# Supplementary material for: The kinesin motor KIF11 coordinates NLR localization and activation in the innate immune response
Source: Research Square preprint supplement (doi:10.21203/rs.3.rs-8293641/v1), 2026-01-06
Supplement: Supplementary file 1 [file 1425e6d0e5cda9a0132e2f86.xlsx]

## Sheet: TOP10
	Gene Symbol	Module	max z-Score	Full Gene Name	Description
1	PYCARD	1	54.4163	PYD And CARD Domain Containing	adaptor protein that is composed of two protein-protein interaction domains: a PYRIN-domain and a CARD
2	KIF11	1/2/3	36.034	Kinesin Family Member 11	motor protein that belongs to the kinesin-like protein family
3	PLK1	1/2/3	23.8527	Polo Like Kinase 1	Ser/Thr protein kinase belongs to the CDC5/Polo subfamily
4	NUF2	3	23.1457	NUF2 Component of NDC80 Kinetochore Complex	highly similar to yeast Nuf2, a component of a conserved protein complex associated with the centromere.
5	CKAP5	2	19.0221	Cytoskeleton Associated Protein 5	cytoskeleton-associated protein which belongs to the TOG/XMAP215 family
6	RRM1	1	12.9531	Ribonucleotide Reductase Catalytic Subunit M1	large and catalytic subunit of ribonucleotide reductase, an enzyme essential for the conversion of ribonucleotides into deoxyribonucleotides
7	NDC80	2	12.8853	NDC80 Kinetochore Complex Component	component of the NDC80 kinetochore complex that is required for proper chromosome segregation
8	KPNB1	1	12.148	Karyopherin Subunit Beta 1	member of the importin beta family that is reqired for the import of proteins containing a nuclear localization signal
9	SON	3	12.0344	SON DNA And RNA Binding Protein	protein that contains multiple simple repeats and binds RNA and promotes pre-mRNA splicing
10	TFRC	1	10.9827	Transferrin Receptor	cell surface receptor necessary for cellular iron uptake by the process of receptor-mediated endocytosis
