# Supplementary material for: The kinesin motor KIF11 coordinates NLR localization and activation in the innate immune response
Source: Research Square preprint supplement (doi:10.21203/rs.3.rs-8293641/v1), 2026-01-06
Supplement: Supplementary file 2 [file 1b6097ac4d62a6f5faba95d6.xlsx]

## Sheet: z-Score>2,p<0.05
No	Barcode Sequence	Target Sequence	Gene Symbol	Definition	Redundancy	ave-fc	sd-fc	T-test	z-Score
21827	TGCACAACACTGCAGTAC	CGGAAGCTCTTCAGTTTCACA	PYCARD	Homo sapiens PYD and CARD domain containing (PYCARD), transcript variant 1, mRNA.	3	20.3	0.290995	0.000167122	54.4163
21828	GTCACAACACTGCAGTGT	GCTCAAGAAGTTCAAGCTGAA	PYCARD	Homo sapiens PYD and CARD domain containing (PYCARD), transcript variant 1, mRNA.	3	9.39606	0.199275	0.000642615	23.6456
15170	CAGTACACCAGTCACACA	GGATCCCTTGGCTGGTATAAT	KIF11	Homo sapiens kinesin family member 11 (KIF11), mRNA.	5	9.07811	0.0266931	1.08577e-05	22.7483
20261	GTTGACACGTGTCACAAC	CGATACTACCTACGGCAAATT	PLK1	Homo sapiens polo-like kinase 1 (Drosophila) (PLK1), mRNA.	3	7.61927	0.145053	0.00140121	18.6315
15158	TGACCAGTGTGTCACACA	CCGATAAGATAGAAGATCAAA	KIF11	Homo sapiens kinesin family member 11 (KIF11), mRNA.	5	6.45013	0.86406	0.0125492	15.3322
15161	GTTGCAGTGTGTCACAGT	GCGTACAAGAACATCTATAAT	KIF11	Homo sapiens kinesin family member 11 (KIF11), mRNA.	5	5.99795	0.611115	0.00739398	14.0562
22831	CACATGGTACCATGGTAC	CCCACAACTTTCTAGCTGTTT	RRM1	Homo sapiens ribonucleotide reductase M1 polypeptide (RRM1), mRNA.	2	5.60704	0.277251	0.00740798	12.9531
13049	GTACACGTCAGTCAGTGT	CTGCTCCTCTAACATGTATTT	HOXA11	Homo sapiens homeobox A11 (HOXA11), mRNA.	1	5.49575	1.37619	0.0447835	12.639
15320	CACAGTTGTGTGACCAGT	CGACGAGAAGTCAAGAACTAT	KPNB1	Homo sapiens karyopherin (importin) beta 1 (KPNB1), mRNA.	2	5.32177	0.778671	0.0177069	12.148
25409	ACACGTTGTGACTGCACA	GCTGGTCAGTTCGTGATTAAA	TFRC	Homo sapiens transferrin receptor (p90, CD71) (TFRC), mRNA.	2	4.90883	0.341772	0.0045987	10.9827
26313	ACCAACGTGTGTACCACA	CCACAAGTTTGACCTGATGTA	TUBA1C	Homo sapiens tubulin, alpha 1c (TUBA1C), mRNA.	2	4.86139	0.377309	0.00480282	10.8488
21830	GTTGTGGTGTGTTGCAGT	CCCACCAAATCATCCTGAATC	PYCARD	Homo sapiens PYD and CARD domain containing (PYCARD), transcript variant 1, mRNA.	3	4.26552	0.591368	0.0174691	9.16731
8329	TGACTGTGCACAACGTTG	GCAGCTGAAGTCAGTCACAAT	DNAJB2	Homo sapiens DnaJ (Hsp40) homolog, subfamily B, member 2 (DNAJB2), transcript variant 2, mRNA.	1	3.87397	0.00630923	3.61325e-05	8.06237
20605	TGGTCAGTACACTGCAGT	GGAAGGAACCATCCAGTAAAG	POLR2L	Homo sapiens polymerase (RNA) II (DNA directed) polypeptide L, 7.6kDa (POLR2L), mRNA.	1	3.70658	0.198963	0.00331105	7.59
25204	GTACCAGTGTGTACGTCA	CCTGTTGTGGTCCAAGTTTAA	TBX21	Homo sapiens T-box 21 (TBX21), mRNA.	1	3.70187	0.53559	0.0217249	7.57671
2792	CATGGTACACACTGCAGT	AGGATATATGTGGCAATATTA	ATP5L	Homo sapiens ATP synthase, H+ transporting, mitochondrial F0 complex, subunit G (ATP5L), nuclear gene encoding mitochondrial protein, mRNA.	2	3.63948	0.550658	0.0283186	7.40066
7593	TGCAGTACGTGTCAGTTG	GCCTTAACATAGCCCACTTTA	CYP51A1	Homo sapiens cytochrome P450, family 51, subfamily A, polypeptide 1 (CYP51A1), mRNA.	1	3.61596	0.420717	0.0141311	7.33428
15755	CAGTCAGTTGACACGTAC	CGTACTTTGTCTGACTACAAT	LOC388720	PREDICTED: Homo sapiens similar to ubiquitin and ribosomal protein S27a precursor (LOC388720), mRNA.	1	3.57915	0.171221	0.0117574	7.23041
19424	ACTGCACACACAACGTGT	CCAGCTCATAACAGTCACAAT	PDHX	Homo sapiens pyruvate dehydrogenase complex, component X (PDHX), nuclear gene encoding mitochondrial protein, mRNA.	2	3.33801	0.138055	0.00211832	6.54991
25410	TGTGACTGTGTGTGCAAC	CCCATAGCTTCCATGAGAACA	TFRC	Homo sapiens transferrin receptor (p90, CD71) (TFRC), mRNA.	2	3.30391	0.217297	0.00444753	6.45368
14087	CATGTGCATGTGGTGTTG	AGGAATCACAATCCCACGAAA	IL17A	Homo sapiens interleukin 17A (IL17A), mRNA.	1	3.24304	0.643322	0.0421753	6.2819
6923	GTCAACTGCATGCAGTGT	GCATGGAATTACACAAGCAAA	CSE1L	Homo sapiens CSE1 chromosome segregation 1-like (yeast) (CSE1L), mRNA.	1	3.20557	0.150369	0.00241273	6.17618
22108	GTCACAACTGTGGTGTAC	ACGTCATTTGACTGGTGAATT	RAN	Homo sapiens RAN, member RAS oncogene family (RAN), mRNA.	1	3.05001	0.31981	0.0119985	5.73719
13070	CAACGTTGTGGTACGTCA	CCCACACTTTATATACGAATA	HOXB4	Homo sapiens homeo box B4 (HOXB4), mRNA.	1	3.01248	0.598884	0.0415466	5.6313
16754	ACCAGTTGGTTGACGTTG	CCATCCTTCAAGTGAACAATT	MEIS1	Homo sapiens Meis homeobox 1 (MEIS1), mRNA.	1	2.97958	0.555358	0.0371908	5.53844
16971	TGCAACGTACACACCACA	GCTCTGGAATTAGTCACAGAA	MMAB	Homo sapiens methylmalonic aciduria (cobalamin deficiency) cblB type (MMAB), nuclear gene encoding mitochondrial protein, mRNA.	1	2.96059	0.0422865	0.00477552	5.48485
24160	CAGTACACCACAACCACA	TGCTCACACAGTCAGTCAAGA	SNRPD2	Homo sapiens small nuclear ribonucleoprotein D2 polypeptide 16.5kDa (SNRPD2), transcript variant 2, mRNA.	2	2.94441	0.537358	0.0361315	5.43918
13361	TGACACCAACTGACGTTG	GCTGTATTGTCACAAGCACAT	HSP90AA1	Homo sapiens heat shock protein 90kDa alpha (cytosolic), class A member 1 (HSP90AA1), transcript variant 2, mRNA.	1	2.90367	0.0308415	0.00447093	5.32423
15173	ACACTGACCAGTCACAGT	GAAGTACATAAGACCTTATTT	KIF11	Homo sapiens kinesin family member 11 (KIF11), mRNA.	5	2.86569	0.233358	0.00774617	5.21705
24148	ACGTTGTGGTGTGTGTAC	GCAGCAGAGTATGAGAACATT	SNRNP200	Homo sapiens small nuclear ribonucleoprotein 200kDa (U5) (SNRNP200), mRNA.	2	2.85366	0.0729454	0.00696765	5.18309
8849	CATGACCATGCAACCACA	CACACACACACACACACACAA	EFNB1	Homo sapiens ephrin-B1 (EFNB1), mRNA.	1	2.81544	0.554139	0.0437476	5.07525
22272	TGGTACGTACCATGGTCA	CGAGAGCATTCACAAACTGAA	RBM8A	Homo sapiens RNA binding motif protein 8A (RBM8A), mRNA.	2	2.80621	0.111641	0.00233456	5.04921
15318	TGCAGTTGTGTGACCATG	CCAGTGTAGTTGTTCGAGATA	KPNB1	Homo sapiens karyopherin (importin) beta 1 (KPNB1), mRNA.	2	2.78958	0.0134135	3.97021e-05	5.00228
21490	CAACTGGTACCACATGTG	GAGTACAGATTGAACACATAT	PSMD11	Homo sapiens proteasome (prosome, macropain) 26S subunit, non-ATPase, 11 (PSMD11), mRNA.	1	2.76393	0.224715	0.00969579	4.92988
26277	GTGTACACGTTGCAGTCA	CTTCTTTGGTGCCCGACAAAT	TSPO	Homo sapiens translocator protein (18kDa) (TSPO), transcript variant PBR-S, mRNA.	1	2.75228	0.135461	0.00820796	4.89701
11762	ACCATGCAGTACTGCAAC	GCTGGGAAATTGTGTCACAAT	GPAM	Homo sapiens glycerol-3-phosphate acyltransferase, mitochondrial (GPAM), nuclear gene encoding mitochondrial protein, mRNA.	1	2.70826	0.28788	0.0284559	4.77278
24931	GTACTGGTACCATGCACA	CCTGTCCTTGTACATGTACCT	SULT2A1	Homo sapiens sulfotransferase family, cytosolic, 2A, dehydroepiandrosterone (DHEA)-preferring, member 1 (SULT2A1), mRNA.	1	2.6832	0.0032594	0.00622285	4.70207
21636	GTACGTCACATGACGTCA	GCGGTGTATTGGAGTCACAAA	PTGFR	Homo sapiens prostaglandin F receptor (FP) (PTGFR), transcript variant 2, mRNA.	1	2.652	0.165485	0.00513441	4.61402
10315	ACACTGACACCAACGTCA	GCCTCTGACCTACCCTCAGTA	FOSL1	Homo sapiens FOS-like antigen 1 (FOSL1), mRNA.	1	2.60683	0.407615	0.0378925	4.48655
2350	GTGTACCAACCATGCACA	CAGTCCCTCTGGAAAGAAACA	ARNT	Homo sapiens aryl hydrocarbon receptor nuclear translocator (ARNT), transcript variant 1, mRNA.	1	2.60342	0.0203984	0.00306767	4.47693
902	CAGTCATGACACTGGTAC	CCGGAAATTCTTATTCGATCT	ADHFE1	Homo sapiens alcohol dehydrogenase, iron containing, 1 (ADHFE1), nuclear gene encoding mitochondrial protein, mRNA.	1	2.60132	0.296326	0.0215555	4.47101
10708	CAACGTGTACTGACGTCA	CCCGCGTGAAACTCTTTGAAA	GABBR1	Homo sapiens gamma-aminobutyric acid (GABA) B receptor, 1 (GABBR1), transcript variant 4, mRNA.	1	2.56387	0.168601	0.00715651	4.36532
2171	TGGTTGCACAGTCATGAC	CCTGCTAATCAAGTCACACAT	AR	Homo sapiens androgen receptor (AR), transcript variant 2, mRNA.	1	2.53895	0.231948	0.0145603	4.29498
24983	TGACTGACCAACACCAAC	GCTACTTATATCCAAACCATT	SVIL	Homo sapiens supervillin (SVIL), transcript variant 2, mRNA.	1	2.52419	0.228959	0.0110979	4.25333
14671	TGACCAGTACACCAGTTG	CGGTCCTTCAAGTGAACAGTT	ITGA2	Homo sapiens integrin, alpha 2 (CD49B, alpha 2 subunit of VLA-2 receptor) (ITGA2), mRNA.	1	2.52026	0.0189231	0.00449006	4.24227
7943	GTTGCAACGTGTGTGTTG	GCACTCAAGGAGCTGATATTA	DDX56	Homo sapiens DEAD (Asp-Glu-Ala-Asp) box polypeptide 56 (DDX56), mRNA.	1	2.51842	0.37687	0.0294529	4.23706
27011	TGCACACAACTGACCAGT	GACAAGTACTACCGAGTCAAT	VTN	Homo sapiens vitronectin (VTN), mRNA.	1	2.51251	0.22251	0.0256439	4.22038
11298	TGACCAACCAGTCAGTAC	GCAGCCAATAAGCTCATCAAA	GGA1	Homo sapiens golgi associated, gamma adaptin ear containing, ARF binding protein 1 (GGA1), transcript variant 1, mRNA.	1	2.48479	0.0553667	0.00170879	4.14216
22401	TGACACGTACGTACGTTG	CGGATTGAGGAGAAACGTAAA	RELA	Homo sapiens v-rel reticuloendotheliosis viral oncogene homolog A (avian) (RELA), mRNA.	1	2.47236	0.0518368	0.00352569	4.10709
17673	ACTGGTCACACAACCAAC	AGGAGGAAGAAGCTAACTATT	NDE1	Homo sapiens nudE nuclear distribution gene E homolog 1 (A. nidulans) (NDE1), mRNA.	1	2.46391	0.189544	0.00839822	4.08324
25910	GTTGGTACGTCATGGTAC	CGACTCTTAGAGGCATCTAAA	TNKS	Homo sapiens tankyrase, TRF1-interacting ankyrin-related ADP-ribose polymerase (TNKS), mRNA.	1	2.46227	0.031105	0.00285518	4.07861
12131	ACGTCATGTGTGACGTTG	CCGTGTTCACACACACACAAT	GRM5	Homo sapiens glutamate receptor, metabotropic 5 (GRM5), mRNA.	1	2.45779	0.148195	0.00610224	4.06597
15164	CAGTCAGTGTGTCACAGT	GCCAATGTTGTGAGGCTTCAA	KIF11	Homo sapiens kinesin family member 11 (KIF11), mRNA.	5	2.44313	0.226192	0.0132789	4.02459
5254	GTACCAACGTACACGTAC	GCCCAGTGTTACATCAAATAT	CDC23	Homo sapiens cell division cycle 23 homolog (S. cerevisiae) (CDC23), mRNA.	1	2.43739	0.0010239	0.0244138	4.0084
4328	CACATGGTACCAGTGTCA	GCTGCCCACAAAGAATGACAA	CAPN11	Homo sapiens calpain 11 (CAPN11), mRNA.	1	2.43529	0.179617	0.0110904	4.00247
26104	TGACGTACGTACACGTCA	CCTGGATTCTACACTGGCAAA	TRAF6	Homo sapiens TNF receptor-associated factor 6 (TRAF6), transcript variant 2, mRNA.	1	2.434	0.0331529	0.0292003	3.99882
25571	ACACCAACTGGTACCAGT	GTGAAGGATCTGATCCGCTAT	TIMELESS	Homo sapiens timeless homolog (Drosophila) (TIMELESS), mRNA.	2	2.43026	0.356118	0.0317626	3.98829
24149	TGGTTGTGGTGTGTGTTG	GCAGATGAAGTATTGGAGATT	SNRNP200	Homo sapiens small nuclear ribonucleoprotein 200kDa (U5) (SNRNP200), mRNA.	2	2.42359	0.0257931	0.00189096	3.96946
5880	GTGTACGTGTTGCAGTAC	CGTGCAAATGCACATGCAAGA	CHRNA4	Homo sapiens cholinergic receptor, nicotinic, alpha 4 (CHRNA4), mRNA.	1	2.41533	0.0966944	0.00232573	3.94614
25564	ACTGGTACGTCAGTGTAC	CCTACACAAGTAGAAAGAATT	TICAM2	Homo sapiens toll-like receptor adaptor molecule 2 (TICAM2), mRNA.	1	2.39141	0.0242716	0.00697012	3.87864
25803	GTGTACCACAACCAGTCA	CTAGGCTATTTGTCATGTAAA	TNFRSF19	Homo sapiens tumor necrosis factor receptor superfamily, member 19 (TNFRSF19), transcript variant 2, mRNA.	1	2.37514	0.102044	0.00860679	3.83274
3133	ACTGTGTGCATGTGGTGT	GTGGCTTAACAGTGGAACAAT	B4GALT5	Homo sapiens UDP-Gal:betaGlcNAc beta 1,4- galactosyltransferase, polypeptide 5 (B4GALT5), mRNA.	1	2.36332	0.195648	0.0116626	3.79938
7447	ACCAGTGTTGGTCAGTCA	CCAGCACTTCCTGGATAAGAA	CYP2A13	Homo sapiens cytochrome P450, family 2, subfamily A, polypeptide 13 (CYP2A13), mRNA.	1	2.3496	0.391244	0.0431763	3.76065
3928	TGTGTGACCACAGTGTTG	CCTGTGAATGTAAGTGACAAA	C4BPB	Homo sapiens complement component 4 binding protein, beta (C4BPB), transcript variant 5, mRNA.	1	2.33556	0.307474	0.0259702	3.72104
23553	TGGTCAGTGTCAACGTAC	CCGCTATAGCAGCAGTTCATA	SIN3A	Homo sapiens SIN3 homolog A, transcription regulator (yeast) (SIN3A), mRNA.	1	2.32683	0.291652	0.0284789	3.69639
17594	TGCAACGTACCATGGTAC	GTTCTGTCAGATGAAAGCAAA	NCF1	Homo sapiens neutrophil cytosolic factor 1 (NCF1), mRNA.	1	2.32472	0.0295627	0.0043376	3.69044
26311	GTGTACGTGTGTACCATG	GCTGCCCTTGAGAAGGATTAT	TUBA1C	Homo sapiens tubulin, alpha 1c (TUBA1C), mRNA.	2	2.31868	0.120447	0.00442567	3.6734
16629	ACGTACACACCAACGTGT	GCACAAGGTACGTGGTGATAT	MCM2	Homo sapiens minichromosome maintenance complex component 2 (MCM2), mRNA.	1	2.3176	0.187824	0.0101487	3.67036
21379	GTGTTGTGACCACATGGT	GATGCTAATGTTCTGACTAAT	PSMA4	Homo sapiens proteasome (prosome, macropain) subunit, alpha type, 4 (PSMA4), mRNA.	1	2.31111	0.15703	0.00743123	3.65204
6879	GTTGTGCAGTTGACCACA	CGAAGCAAATCCTCAGTATTT	CRTAM	Homo sapiens cytotoxic and regulatory T cell molecule (CRTAM), mRNA.	1	2.30367	0.171807	0.00870327	3.63104
25519	CACAGTCATGACTGCACA	GGAGTCTCAGACGCCGATATT	THOC4	PREDICTED: Homo sapiens THO complex 4 (THOC4), mRNA.	1	2.29487	0.190619	0.0203275	3.6062
10159	GTTGACCAACGTTGCATG	CCAGCCATCATGACAAATCCT	FKBP1A	Homo sapiens FK506 binding protein 1A, 12kDa (FKBP1A), transcript variant 12B, mRNA.	1	2.28829	0.0273775	0.00170543	3.58765
1095	ACCATGACCATGTGGTTG	CTATCAAGTATGACCCTCAAT	AGPAT6	Homo sapiens 1-acylglycerol-3-phosphate O-acyltransferase 6 (lysophosphatidic acid acyltransferase, zeta) (AGPAT6), mRNA.	1	2.2877	0.193782	0.0162804	3.58597
22022	TGCACACAGTGTACGTTG	CGGTCAGAGATCATACAGATT	RAD51	Homo sapiens RAD51 homolog (RecA homolog, E. coli) (S. cerevisiae) (RAD51), transcript variant 1, mRNA.	1	2.26927	0.386976	0.044037	3.53397
25373	ACGTCATGACCAACGTGT	GCTCTTGTGGTACACACAGAT	TFCP2	Homo sapiens transcription factor CP2 (TFCP2), mRNA.	1	2.26057	0.239339	0.0337792	3.50943
15595	ACACGTGTTGCACAGTTG	GCCTGTAATCCCAGCACTTTA	LIAS	Homo sapiens lipoic acid synthetase (LIAS), nuclear gene encoding mitochondrial protein, transcript variant 2, mRNA.	1	2.25228	0.163421	0.00966232	3.48602
2940	CATGCAACGTACGTCACA	CGCTGGTTTCTGTGCAGTGTT	ATXN1	Homo sapiens ataxin 1 (ATXN1), mRNA.	2	2.25216	0.0386113	0.035078	3.48568
11450	TGACCAGTGTACTGCACA	CGAAGGAACAACCCTTGTCAA	GLI3	Homo sapiens GLI-Kruppel family member GLI3 (Greig cephalopolysyndactyly syndrome) (GLI3), mRNA.	1	2.23947	0.0746417	0.00291665	3.44987
3445	GTACCATGTGGTACCAAC	CCATCCAGTTTGGCAACTACA	BGN	Homo sapiens biglycan (BGN), mRNA.	1	2.23745	0.161971	0.00925062	3.44417
21311	CAACGTTGTGTGGTCATG	GCGGATCTTTGGACAGAAGCA	PRTN3	Homo sapiens proteinase 3 (PRTN3), mRNA.	1	2.23303	0.0129231	0.00112188	3.4317
150	GTGTACACTGTGCAGTTG	CCGGATCTTCACCTTCATGAA	ABCA7	Homo sapiens ATP-binding cassette, sub-family A (ABC1), member 7 (ABCA7), mRNA.	1	2.22956	0.0879893	0.00970016	3.42191
4931	ACGTCATGACTGTGCAAC	CGGGTTTGAGATGGACACACT	CD22	Homo sapiens CD22 molecule (CD22), mRNA.	1	2.22025	0.210498	0.0254295	3.39563
19897	ACCAGTACTGGTCATGAC	CGAGCAGTAGATCAAGTAATT	PIK3C2A	Homo sapiens phosphoinositide-3-kinase, class 2, alpha polypeptide (PIK3C2A), mRNA.	1	2.20167	0.264671	0.0259209	3.34319
7665	ACTGGTTGCAACGTGTCA	GCTGGATATGTTCCCAGATTA	DAO	Homo sapiens D-amino-acid oxidase (DAO), mRNA.	1	2.19717	0.0639336	0.00157652	3.33051
5866	GTCACATGGTTGCAGTAC	CGTTCCTAGCTGGAATGATCT	CHRNA2	Homo sapiens cholinergic receptor, nicotinic, alpha 2 (neuronal) (CHRNA2), mRNA.	1	2.19535	0.0304548	0.00194514	3.32536
15350	CAACCACACATGCAGTGT	CGAGAAGCTAACCATGCAGAA	KRT19	Homo sapiens keratin 19 (KRT19), mRNA.	1	2.19438	0.152569	0.0179491	3.32264
17300	GTGTTGACTGGTCATGCA	CCAGGACTCTACACATGCATA	MUSK	Homo sapiens muscle, skeletal, receptor tyrosine kinase (MUSK), mRNA.	1	2.19239	0.238803	0.0194721	3.31701
17938	GTCAACACTGCATGGTGT	CCTGACACTTACAACAGTCAA	NF1	Homo sapiens neurofibromin 1 (NF1), transcript variant 1, mRNA.	1	2.18282	0.047881	0.00786064	3.29001
5182	CAGTCACACACAGTGTCA	GCTGGAGGACTGAGTAAGAAA	CD8B	Homo sapiens CD8b molecule (CD8B), transcript variant 1, mRNA.	1	2.18	0.0260781	0.000270712	3.28205
8772	ACGTACTGACTGACGTCA	CTGTTGGTATTGGACTATATT	EDNRB	Homo sapiens endothelin receptor type B (EDNRB), transcript variant 1, mRNA.	1	2.17586	0.362076	0.0462455	3.27036
4507	CAGTCAACGTACACCAGT	GCTTCCTGATTGAGATTCAGT	CAV1	Homo sapiens caveolin 1, caveolae protein, 22kDa (CAV1), mRNA.	1	2.17253	0.113556	0.0187518	3.26097
7847	GTTGGTCATGACACGTGT	GCCAATGATGTGACCCTCAAT	DDIT3	Homo sapiens DNA-damage-inducible transcript 3 (DDIT3), mRNA.	1	2.159	0.327714	0.0431761	3.2228
20217	GTCAACTGTGGTGTGTCA	GCCAAGTACAAGACTCCCATA	PLD2	Homo sapiens phospholipase D2 (PLD2), mRNA.	1	2.14331	0.251204	0.0309699	3.17851
24166	GTACGTACTGCACAGTCA	CAGAAAGATCAAGCCAAAGAA	SNRPN	Homo sapiens small nuclear ribonucleoprotein polypeptide N (SNRPN), transcript variant 3, mRNA.	2	2.14283	0.0788464	0.00882836	3.17717
22683	ACTGACTGCAGTTGCATG	GAGGGCATATTAGCTACACTA	RPE	Homo sapiens ribulose-5-phosphate-3-epimerase (RPE), transcript variant 2, mRNA.	1	2.14	0.160078	0.0114853	3.16916
7283	GTCAACTGTGACCAGTAC	CTGGAAGAAGAACAAGTCAAT	CXCL13	Homo sapiens chemokine (C-X-C motif) ligand 13 (B-cell chemoattractant) (CXCL13), mRNA.	1	2.13627	0.283786	0.0435441	3.15866
21488	ACTGGTGTTGACCAGTCA	GCATCATCATTCTGAAGGATA	PSMD1	Homo sapiens proteasome (prosome, macropain) 26S subunit, non-ATPase, 1 (PSMD1), mRNA.	1	2.11597	0.120617	0.00859281	3.10137
8763	ACACACTGACTGACGTTG	CCAGACAGATTGCTGATAATA	EDNRA	Homo sapiens endothelin receptor type A (EDNRA), mRNA.	1	2.10953	0.363429	0.0497264	3.08319
20646	CAGTACCACAGTGTGTTG	CGAGCCCTCATCTGTATCATA	POLS	Homo sapiens polymerase (DNA directed) sigma (POLS), mRNA.	1	2.10269	0.157832	0.0188537	3.06389
24158	ACACACCAACCACAGTCA	GCTCACACAGTCAGTCAAGAA	SNRPD2	Homo sapiens small nuclear ribonucleoprotein D2 polypeptide 16.5kDa (SNRPD2), transcript variant 2, mRNA.	2	2.07702	0.0645157	0.0198658	2.99145
20255	GTACCAACACACACGTTG	CGCCTCATCCTCTACAATGAT	PLK1	Homo sapiens polo-like kinase 1 (Drosophila) (PLK1), mRNA.	3	2.07698	0.0347255	0.0140212	2.99134
3318	GTCATGCATGCATGGTCA	GTGATGAAGTACATCCATTAT	BCL2	Homo sapiens B-cell CLL/lymphoma 2 (BCL2), nuclear gene encoding mitochondrial protein, transcript variant alpha, mRNA.	1	2.0707	0.0124464	0.0368065	2.9736
1777	CAGTGTTGCAGTACCACA	GACGAACCAAGGCAACTACAA	ANGPTL2	Homo sapiens angiopoietin-like 2 (ANGPTL2), mRNA.	1	2.06863	0.0886139	0.00443354	2.96777
20436	GTTGGTGTCAGTGTGTGT	GCTGACCAGTTGGACAACATT	POLE	Homo sapiens polymerase (DNA directed), epsilon (POLE), mRNA.	1	2.06844	0.201447	0.0347227	2.96722
20743	ACCATGTGACGTCATGCA	CAGCATTTCTACTCCACATTA	PPARG	Homo sapiens peroxisome proliferator-activated receptor gamma (PPARG), transcript variant 2, mRNA.	1	2.06504	0.226738	0.0296025	2.95763
19138	CAACACGTTGGTACGTCA	CAGGCATCAGAGCACATCAAA	PAX2	Homo sapiens paired box 2 (PAX2), transcript variant c, mRNA.	1	2.0585	0.263441	0.0349713	2.93918
18573	GTTGGTCATGTGGTGTTG	CCCAGTTATGACCCTCTCAAA	NT5E	Homo sapiens 5'-nucleotidase, ecto (CD73) (NT5E), mRNA.	1	2.05165	0.0721083	0.0188762	2.91984
4725	CAACTGGTACACACGTCA	GCATGTTAACAGGGTATATTT	CCNB3	Homo sapiens cyclin B3 (CCNB3), transcript variant 3, mRNA.	1	2.04957	0.164966	0.0129561	2.91399
1407	TGTGTGACTGACTGGTGT	GCTGTATTAGAACCCTCAGAT	ALDH1A3	Homo sapiens aldehyde dehydrogenase 1 family, member A3 (ALDH1A3), mRNA.	1	2.04693	0.0855042	0.0264877	2.90654
3825	CAGTGTTGGTTGTGGTTG	GCTTTCGAGTATACTGTATTA	C1GALT1C1	Homo sapiens C1GALT1-specific chaperone 1 (C1GALT1C1), transcript variant 1, mRNA.	1	2.04469	0.0929919	0.0039384	2.9002
594	ACACCATGGTGTCACAAC	CGAGAAGATGACCCAGATCAT	ACTA1	Homo sapiens actin, alpha 1, skeletal muscle (ACTA1), mRNA.	2	2.0431	0.188762	0.0165139	2.89571
23982	CATGACCAGTCAGTGTGT	CCTGGAAAGTTCTTTGGAATT	SMAD5	Homo sapiens SMAD family member 5 (SMAD5), transcript variant 1, mRNA.	1	2.04241	0.082092	0.00342951	2.89378
18708	GTTGACGTTGTGGTGTGT	GCGGAAGCTCTTTGTACCAAA	OCRL	Homo sapiens oculocerebrorenal syndrome of Lowe (OCRL), transcript variant b, mRNA.	1	2.03775	0.0420191	0.0207024	2.88062
21371	GTTGTGTGACCACATGTG	AGAACCAATTACCAAGCATAT	PSMA2	Homo sapiens proteasome (prosome, macropain) subunit, alpha type, 2 (PSMA2), mRNA.	1	2.03541	0.0491925	0.00559373	2.87402
3755	TGACCACACATGACCATG	GATTGCCTCTACTCATCACTA	BTLA	Homo sapiens B and T lymphocyte associated (BTLA), transcript variant 1, mRNA.	1	2.03282	0.285498	0.0378021	2.8667
19543	GTTGTGACCAGTACGTAC	CGTGCCCACAAACTGAGTATT	PER3	Homo sapiens period homolog 3 (Drosophila) (PER3), mRNA.	1	2.03188	0.258992	0.0301564	2.86407
9999	CACACAACTGTGGTCAAC	GCTCTTCTGTATGTGACAACA	FGB	Homo sapiens fibrinogen beta chain (FGB), mRNA.	1	2.02884	0.0156065	0.00803677	2.85549
5621	ACACCACAGTGTTGGTAC	TCCAGATTTGTCCTTGTCTTT	CERK	Homo sapiens ceramide kinase (CERK), transcript variant 2, mRNA.	1	2.02621	0.121129	0.00766772	2.84807
5168	ACTGACGTGTCAGTGTCA	ACAGAGTATCTTCCCAGATTT	CD83	Homo sapiens CD83 molecule (CD83), transcript variant 1, mRNA.	1	2.02083	0.12309	0.0115703	2.83288
21297	ACCATGGTGTACGTGTTG	CGTGTGGCTATCCTTGTAGAT	PRPS1L1	Homo sapiens phosphoribosyl pyrophosphate synthetase 1-like 1 (PRPS1L1), mRNA.	1	2.01602	0.187386	0.0168959	2.81929
12736	GTTGACCAGTGTCATGCA	TGTCTGAAGCACCCACCAATA	HGF	Homo sapiens hepatocyte growth factor (hepapoietin A; scatter factor) (HGF), transcript variant 1, mRNA.	1	2.01141	0.0929426	0.00603871	2.80631
12466	CAGTGTACACACTGGTGT	GCCCAGCCCATCCTTAAATAA	HADH	Homo sapiens hydroxyacyl-Coenzyme A dehydrogenase (HADH), nuclear gene encoding mitochondrial protein, mRNA.	1	2.01038	0.0036745	0.0269095	2.80338
13931	ACCACAGTCAGTCAGTCA	GAGCACAGATACCCAGAACTT	IGFBP3	Homo sapiens insulin-like growth factor binding protein 3 (IGFBP3), transcript variant 2, mRNA.	1	2.00911	0.205281	0.0338754	2.7998
26268	TGACTGACACCAACCATG	CGTCTCTACTAGAAATACAAA	TSNAX	Homo sapiens translin-associated factor X (TSNAX), mRNA.	1	2.00122	0.0315792	0.0203533	2.77755
13029	GTGTGTACACGTTGCAGT	CAGCAGCAGAGTGAGTGGATT	HNRPK	Homo sapiens heterogeneous nuclear ribonucleoprotein K (HNRPK), transcript variant 3, mRNA.	1	2.00021	0.03219	0.00351596	2.77468
22835	GTACTGGTTGACTGCATG	CCAATCCAGTTCACTCTAAAT	RRM1	Homo sapiens ribonucleotide reductase M1 polypeptide (RRM1), mRNA.	2	1.99857	0.213873	0.0326445	2.77006
20591	ACACCAACGTGTACGTCA	TGGACGAACTGACCCAGATTA	POLR2I	Homo sapiens polymerase (RNA) II (DNA directed) polypeptide I, 14.5kDa (POLR2I), mRNA.	1	1.99005	0.163988	0.0141279	2.74603
3790	CACAGTTGGTCAACCAGT	CTCTTCTATGAATCCAGAATA	C10ORF110	Homo sapiens chromosome 10 open reading frame 110 (C10orf110), mRNA.	1	1.98912	0.0659455	0.00358636	2.74341
16350	TGGTACGTCAGTACCAGT	GAAGCTGACTTACAGGAATAT	MAP3K8	Homo sapiens mitogen-activated protein kinase kinase kinase 8 (MAP3K8), mRNA.	1	1.98781	0.105092	0.00571382	2.73971
10035	TGTGGTGTACTGTGCACA	CACGCAAAGGGACTGTAGTCA	FGF18	Homo sapiens fibroblast growth factor 18 (FGF18), mRNA.	1	1.98775	0.208914	0.0222472	2.73952
12751	ACACTGTGACACTGCACA	CTTGGTAAAGAACATCCATAA	HGSNAT	Homo sapiens heparan-alpha-glucosaminide N-acetyltransferase (HGSNAT), mRNA.	1	1.98206	0.115293	0.00979244	2.72348
7115	ACCAACTGACGTCAGTGT	GCTGGCAATGAACAAGACTTA	CTNNA1	Homo sapiens catenin (cadherin-associated protein), alpha 1, 102kDa (CTNNA1), mRNA.	1	1.9806	0.141677	0.0230493	2.71936
19894	CACAACGTACCAACCACA	CCATTCTCATTGCTGATAATG	PIK3AP1	Homo sapiens phosphoinositide-3-kinase adaptor protein 1 (PIK3AP1), mRNA.	1	1.97549	0.233436	0.0378411	2.70494
16628	TGGTACCACACAACCAAC	AGATGCAGGAGCGCTACTTTG	MCM10	Homo sapiens minichromosome maintenance complex component 10 (MCM10), transcript variant 2, mRNA.	1	1.97151	0.197474	0.0216781	2.69369
6772	ACACGTTGCAACTGGTCA	CGTGTGCTATTTCCAGTAAAT	CR1	Homo sapiens complement component (3b/4b) receptor 1 (Knops blood group) (CR1), transcript variant S, mRNA.	1	1.97004	0.171461	0.0189261	2.68956
17686	GTACGTGTACCATGCAGT	GAGACCCAAAGGCACAGTTTA	NDNL2	Homo sapiens necdin-like 2 (NDNL2), mRNA.	1	1.966	0.279703	0.0405074	2.67814
21303	GTTGCAGTACACTGCACA	CCAGCTATTTCCAGAATAAAT	PRPS2	Homo sapiens phosphoribosyl pyrophosphate synthetase 2 (PRPS2), transcript variant 1, mRNA.	1	1.96472	0.149495	0.0447355	2.67454
16639	CAGTGTGTACCACAGTAC	CGTCTCTAGTAAAGATAACAA	MCM4	Homo sapiens minichromosome maintenance complex component 4 (MCM4), transcript variant 1, mRNA.	1	1.96267	0.232533	0.0399496	2.66874
15671	TGTGCATGGTGTTGCAAC	GTCTCATACTTGCACATTGTA	LIPT1	Homo sapiens lipoyltransferase 1 (LIPT1), transcript variant 1, mRNA.	1	1.95324	0.0482764	0.00144219	2.64215
5172	CATGTGGTGTACACGTCA	CCAGACCACATTCCTTGGATT	CD86	Homo sapiens CD86 antigen (CD28 antigen ligand 2, B7-2 antigen) (CD86), transcript variant 1, mRNA.	1	1.9531	0.0406319	0.00687392	2.64175
26052	CATGCAGTTGGTGTGTCA	GCTGGATTCTAGTGACATTTA	TPP2	Homo sapiens tripeptidyl peptidase II (TPP2), mRNA.	1	1.94971	0.0340572	0.00286143	2.63217
22667	CAGTCATGCACACATGTG	CAATCAAGCAAGCTGTGGATT	RPA2	Homo sapiens replication protein A2, 32kDa (RPA2), mRNA.	1	1.94329	0.0227665	0.00607551	2.61407
22631	TGACCAACGTGTACGTAC	CGGGCTTCTGACTGCTCCATA	RNF4	Homo sapiens ring finger protein 4 (RNF4), mRNA.	1	1.93658	0.0193257	0.00206787	2.59514
12991	CAGTCATGTGACGTCATG	GAGTCAGTCCTGCATTTAATG	HMGN1	Homo sapiens high-mobility group nucleosome binding domain 1 (HMGN1), mRNA.	1	1.93574	0.265188	0.0421667	2.59275
22273	GTGTACGTACCATGGTTG	CGCTCTGTTGAAGGCTGGATT	RBM8A	Homo sapiens RNA binding motif protein 8A (RBM8A), mRNA.	2	1.93021	0.120225	0.0119633	2.57714
11601	TGTGTGACACACTGCAGT	GGTAACCAAGGTGCATCTTAG	GNAT3	PREDICTED: Homo sapiens guanine nucleotide binding protein, alpha transducing 3 (GNAT3), mRNA.	1	1.92857	0.115809	0.00775643	2.57253
23456	CAGTACGTCAGTTGGTTG	CACAACACAAATTCCATCCAA	SH3KBP1	Homo sapiens SH3-domain kinase binding protein 1 (SH3KBP1), transcript variant 1, mRNA.	1	1.92857	0.00459372	0.0112312	2.57252
18660	CAACCAGTGTCACATGGT	CCATAGAATCTCACACCAAAT	NUP214	Homo sapiens nucleoporin 214kDa (NUP214), mRNA.	1	1.91681	0.0516791	0.0137707	2.53933
24153	CATGCAGTCAGTCAGTCA	GCTACGTTAGACCAGTTTGAT	SNRPA1	Homo sapiens small nuclear ribonucleoprotein polypeptide A' (SNRPA1), mRNA.	1	1.9162	0.0993097	0.0142841	2.53762
17646	GTTGTGTGACCAACGTGT	CGTGAGGTATGGCTGTATGAA	NCOA4	Homo sapiens nuclear receptor coactivator 4 (NCOA4), mRNA.	1	1.91412	0.108183	0.00896063	2.53174
5669	TGTGACACCACAGTGTGT	GCCAGTAATGTAACATGCATT	CFH	Homo sapiens complement factor H (CFH), transcript variant 1, mRNA.	1	1.90728	0.0433786	0.00117356	2.51245
15558	ACCAACCACACAGTGTTG	GCTGCCAGATGGATACGAATT	LGALS1	Homo sapiens lectin, galactoside-binding, soluble, 1 (LGALS1), mRNA.	1	1.90723	0.285551	0.0461353	2.51231
677	TGGTTGACTGCAGTGTTG	GCCACACTATCGGACATCAAA	ACTN4	Homo sapiens actinin, alpha 4 (ACTN4), mRNA.	1	1.90429	0.251582	0.0484976	2.50402
7676	ACGTGTTGCATGCATGGT	CTGTCCTGAGAAGCATGTAAT	DAPK1	Homo sapiens death-associated protein kinase 1 (DAPK1), mRNA.	1	1.90417	0.194518	0.0225908	2.50366
5808	TGTGTGGTACCAGTGTAC	CGCATGATGGTCGGAGTAAAT	CHP	Homo sapiens calcium binding protein P22 (CHP), mRNA.	1	1.89836	0.142996	0.0133872	2.48728
8257	CATGACGTCATGTGGTCA	CGCTCTTTGGAACACCCATTA	DLST	Homo sapiens dihydrolipoamide S-succinyltransferase (E2 component of 2-oxo-glutarate complex) (DLST), mRNA.	1	1.89797	0.204468	0.0250433	2.48617
1075	TGCAGTGTGTTGTGGTCA	CGGCACTCCATGCTCACTGTT	AGPAT1	Homo sapiens 1-acylglycerol-3-phosphate O-acyltransferase 1 (lysophosphatidic acid acyltransferase, alpha) (AGPAT1), transcript variant 2, mRNA.	1	1.89337	0.175813	0.0202365	2.47318
13121	ACACACACCAGTCAGTGT	CCCTCCACGTACTACAAACAA	HPD	Homo sapiens 4-hydroxyphenylpyruvate dioxygenase (HPD), mRNA.	1	1.89083	0.174615	0.0203882	2.46602
10394	GTGTTGTGTGGTACGTCA	CGCAGAAGTTAGACCACCATT	FOXP1	Homo sapiens forkhead box P1 (FOXP1), transcript variant 1, mRNA.	1	1.88986	0.172735	0.0184635	2.46327
4043	TGACACTGACCAACCATG	GTGAACAACTATCGCCCACTT	CA5A	Homo sapiens carbonic anhydrase VA, mitochondrial (CA5A), nuclear gene encoding mitochondrial protein, mRNA.	1	1.88758	0.0641795	0.00356657	2.45684
22051	TGGTTGGTTGGTGTGTTG	GCTTTATCGAAAGCTGTTAAA	RAD54B	Homo sapiens RAD54 homolog B (S. cerevisiae) (RAD54B), mRNA.	1	1.88548	0.0467698	0.0022981	2.45092
9589	CACAACTGGTACTGCAAC	CAGCGACAAGACGAATGAATT	F10	Homo sapiens coagulation factor X (F10), mRNA.	1	1.88109	0.222616	0.0400323	2.43854
24165	TGACGTACTGCACAGTTG	GTTCAGAAAGATCAAGCCAAA	SNRPN	Homo sapiens small nuclear ribonucleoprotein polypeptide N (SNRPN), transcript variant 3, mRNA.	2	1.86891	0.169512	0.025589	2.40415
14760	TGGTACCAACACCAGTCA	CGAGGTCACATGGTGGGCTTT	ITGB4	Homo sapiens integrin, beta 4 (ITGB4), transcript variant 2, mRNA.	1	1.86463	0.175275	0.020685	2.3921
3479	GTGTACCATGGTTGCACA	CTCCTGCTGTGGTTAAGCACT	BHMT2	Homo sapiens betaine-homocysteine methyltransferase 2 (BHMT2), mRNA.	1	1.86408	0.156864	0.0174722	2.39054
1357	TGACACGTTGCATGGTGT	CCAGAGGTGTTAGAAGATAAT	AKT3	Homo sapiens v-akt murine thymoma viral oncogene homolog 3 (protein kinase B, gamma) (AKT3), transcript variant 2, mRNA.	1	1.86181	0.205896	0.0364798	2.38414
26626	ACGTCAACCAGTTGGTCA	GCAAACTGAGACTGGTGGAAA	UGP2	Homo sapiens UDP-glucose pyrophosphorylase 2 (UGP2), transcript variant 1, mRNA.	1	1.86078	0.247052	0.044173	2.38122
16528	TGCAGTTGTGCATGGTTG	CCACAGAATATATCCAGTATA	MAX	Homo sapiens MYC associated factor X (MAX), transcript variant 3, mRNA.	1	1.86072	0.0642858	0.0308643	2.38106
11547	CAGTACGTGTGTTGGTGT	GTCTCCATAATTCTGTTCTTA	GNA13	Homo sapiens guanine nucleotide binding protein (G protein), alpha 13 (GNA13), mRNA.	1	1.86009	0.184623	0.0392788	2.37926
26978	TGCAACTGGTCAACCACA	CCTCAGAATGTGACTGTATTT	VNN1	Homo sapiens vanin 1 (VNN1), mRNA.	1	1.85974	0.139815	0.0194919	2.37827
11270	GTGTCAACACACACCAAC	CCCTTCTTACTCACACACAAA	GFAP	Homo sapiens glial fibrillary acidic protein (GFAP), mRNA.	1	1.85941	0.0963501	0.0219011	2.37736
13800	GTACGTACCACACATGGT	GACAGACATGACTTTGGATTT	IFNA2	Homo sapiens interferon, alpha 2 (IFNA2), mRNA.	1	1.85519	0.0449403	0.00154991	2.36545
8626	TGACACTGCACAACCACA	TCTAATCCAAAGGGTATATTT	DUSP6	Homo sapiens dual specificity phosphatase 6 (DUSP6), transcript variant 1, mRNA.	1	1.85497	0.162401	0.0432776	2.36483
25037	GTGTTGGTGTCACATGCA	GCATAAGTATGAGCCTCGAAT	T	Homo sapiens T, brachyury homolog (mouse) (T), mRNA.	1	1.84787	0.163754	0.0198737	2.34479
2904	CACACAGTGTCATGGTTG	CTAGGGAAGATACAAGAACTT	ATP6V1G3	Homo sapiens ATPase, H+ transporting, lysosomal 13kDa, V1 subunit G3 (ATP6V1G3), transcript variant 1, mRNA.	1	1.84477	0.138863	0.0132428	2.33603
23663	ACGTCATGCAGTCAGTAC	CTGTGGATTATAGGAACAATA	SLC10A2	Homo sapiens solute carrier family 10 (sodium/bile acid cotransporter family), member 2 (SLC10A2), mRNA.	1	1.84259	0.116914	0.0261934	2.32988
11623	TGCATGCAACACTGCAGT	CCAGGGATGAGACCAACTATG	GNB2L1	Homo sapiens guanine nucleotide binding protein (G protein), beta polypeptide 2-like 1 (GNB2L1), mRNA.	1	1.84206	0.0237938	0.0166046	2.3284
26188	ACCAGTTGGTACACCATG	CGAGTCAATCTGAAAGAAATT	TRO	Homo sapiens trophinin (TRO), transcript variant 6, mRNA.	1	1.84013	0.210227	0.0306239	2.32295
3452	CACAGTGTGTTGACGTTG	GCACTAACAAACCTAATTGAT	BHLHB2	Homo sapiens basic helix-loop-helix domain containing, class B, 2 (BHLHB2), mRNA.	1	1.83998	0.197332	0.0461199	2.32251
208	TGTGACCATGTGCAGTAC	GATGGCATCGTCATCCAGAAA	ABCB9	Homo sapiens ATP-binding cassette, sub-family B (MDR/TAP), member 9 (ABCB9), transcript variant 4, mRNA.	1	1.83763	0.00877629	0.0110141	2.31588
22013	TGTGCACATGCATGGTTG	CGGGTCTTGATTCAGTCACAT	RAD50	Homo sapiens RAD50 homolog (S. cerevisiae) (RAD50), transcript variant 2, mRNA.	1	1.83721	0.109702	0.0449684	2.3147
9742	ACGTCATGTGACTGCAAC	GACTCTAAGCCTCCCGTATAT	FAH	Homo sapiens fumarylacetoacetate hydrolase (fumarylacetoacetase) (FAH), mRNA.	1	1.83679	0.165791	0.0205589	2.31352
18512	TGGTTGCAGTTGCAGTGT	CCTGCAATTATGAGACTAAAT	NSD1	Homo sapiens nuclear receptor binding SET domain protein 1 (NSD1), transcript variant 2, mRNA.	1	1.8348	0.0372458	0.00497514	2.3079
2938	CAACGTCACAGTCATGGT	CAGAACCAGTACGTCCACATT	ATXN1	Homo sapiens ataxin 1 (ATXN1), mRNA.	2	1.83434	0.0786273	0.0292517	2.30661
5897	ACGTTGTGTGACACCACA	CAGATTTGGAAACCAGACATT	CHRNA7	PREDICTED: Homo sapiens cholinergic receptor, nicotinic, alpha 7 (CHRNA7), mRNA.	1	1.83138	0.265864	0.0480462	2.29826
13744	CATGACCAGTGTACCAAC	GACGATGAAATGCCTGATTTA	IFIT1	Homo sapiens interferon-induced protein with tetratricopeptide repeats 1 (IFIT1), transcript variant 2, mRNA.	1	1.8298	0.0691513	0.0284237	2.29379
26385	TGTGCATGTGCAACGTCA	GCTGGACTCCAAGATGGCAAG	TWIST1	Homo sapiens twist homolog 1 (Drosophila) (TWIST1), mRNA.	1	1.82848	0.143698	0.0150526	2.29008
19590	ACACACGTCAGTACCACA	GCTGGCACAATACCGCATCAG	PFKL	Homo sapiens phosphofructokinase, liver (PFKL), transcript variant 2, mRNA.	1	1.82515	0.00145003	0.00460562	2.28067
25088	ACGTACACACCAGTGTAC	CCAGGGTTAAAGACTTGCTTA	TAF13	Homo sapiens TAF13 RNA polymerase II, TATA box binding protein (TBP)-associated factor, 18kDa (TAF13), mRNA.	1	1.82172	0.0275161	0.000776973	2.271
18719	TGTGCATGACACTGGTGT	GAAGCCAACTTCGACATCAAT	OGDH	Homo sapiens oxoglutarate (alpha-ketoglutarate) dehydrogenase (lipoamide) (OGDH), nuclear gene encoding mitochondrial protein, transcript variant 1, mRNA.	1	1.82144	0.25441	0.0473194	2.2702
12607	GTGTACGTTGCACATGGT	CGTGGGTTTCAACGTCAACAT	HDAC4	Homo sapiens histone deacetylase 4 (HDAC4), mRNA.	1	1.8212	0.0494098	0.0134488	2.26954
2790	CACAGTCACAGTTGGTTG	AGAGCTATTCAGAGCCTGAAA	ATP5L	Homo sapiens ATP synthase, H+ transporting, mitochondrial F0 complex, subunit G (ATP5L), nuclear gene encoding mitochondrial protein, mRNA.	2	1.81931	0.0103125	0.00706034	2.26421
7418	GTGTTGACGTGTCAGTCA	GCTTGGCCTGACTCAGAAATT	CYP21A2	Homo sapiens cytochrome P450, family 21, subfamily A, polypeptide 2 (CYP21A2), transcript variant 1, mRNA.	1	1.81817	0.052372	0.0104936	2.26098
25575	ACTGCAACTGGTACCACA	GCCGCATCATCAAGAACAATA	TIMELESS	Homo sapiens timeless homolog (Drosophila) (TIMELESS), mRNA.	2	1.81681	0.169409	0.0217125	2.25714
18703	CAGTCACAACACTGCAAC	ACTGGTATTACTGATCATATT	OCIAD1	Homo sapiens OCIA domain containing 1 (OCIAD1), mRNA.	1	1.81002	0.0844677	0.0380766	2.23797
19426	GTTGCACACACAACGTTG	GCTTACTTACTCCAATCATAA	PDHX	Homo sapiens pyruvate dehydrogenase complex, component X (PDHX), nuclear gene encoding mitochondrial protein, mRNA.	2	1.80944	0.062749	0.0036015	2.23634
21429	ACGTCATGACCACATGTG	TGCGAGTCAACAACAGTACCA	PSMB4	Homo sapiens proteasome (prosome, macropain) subunit, beta type, 4 (PSMB4), mRNA.	1	1.80851	0.0213309	0.0369406	2.23372
18569	CACAGTGTACCAACGTAC	GCCTTGAGGAATACAGAATAT	NT5C3	Homo sapiens 5'-nucleotidase, cytosolic III (NT5C3), transcript variant 1, mRNA.	1	1.80571	0.0869481	0.00577273	2.22583
1889	GTGTTGCACAACGTCAAC	CGTGGTTAGGCACATGTACTT	AOC2	Homo sapiens amine oxidase, copper containing 2 (retina-specific) (AOC2), transcript variant 1, mRNA.	1	1.80241	0.0583293	0.0161756	2.2165
24870	ACTGCAGTTGTGGTGTAC	CCTGCTTCATTTACAAGAATT	SUCLG2	Homo sapiens succinate-CoA ligase, GDP-forming, beta subunit (SUCLG2), mRNA.	1	1.79886	0.0350604	0.00135052	2.20649
7237	ACCACAGTACACACGTGT	GCAAGCTACATCGGATGTATA	CUL2	Homo sapiens cullin 2 (CUL2), mRNA.	1	1.79777	0.00282771	0.00266401	2.20341
14146	TGCAACTGCAACCAGTCA	CAGATCATTAAGCCCTTAGAT	IL19	Homo sapiens interleukin 19 (IL19), transcript variant 2, mRNA.	1	1.79646	0.173186	0.0234636	2.19972
12090	CAACTGTGACACTGCATG	AGAGCCGTTTGATCCTATAAT	GRIP1	Homo sapiens glutamate receptor interacting protein 1 (GRIP1), mRNA. XM_934804 XM_942244 XM_945816 XM_945820 XM_945822 XM_945824 XM_945825	1	1.79627	0.129573	0.0152777	2.19917
4794	TGGTGTACCATGACGTTG	GCAAACATTCAAGCCCACATA	CCNT2	Homo sapiens cyclin T2 (CCNT2), transcript variant a, mRNA.	1	1.79494	0.185167	0.0477338	2.19542
3623	GTGTGTCATGTGCATGCA	GACGAGAGCTTGAACAGAAAT	BMPR1B	Homo sapiens bone morphogenetic protein receptor, type IB (BMPR1B), mRNA.	1	1.79419	0.0204236	0.0015703	2.19331
604	GTTGACCAGTGTCACAGT	ACCCACAACGTGCCCATTTAT	ACTA1	Homo sapiens actin, alpha 1, skeletal muscle (ACTA1), mRNA.	2	1.79397	0.182875	0.0306284	2.19268
17796	TGCAACGTGTGTCAGTAC	GCAGTAGAGGAACCATCCATA	NDUFS1	Homo sapiens NADH dehydrogenase (ubiquinone) Fe-S protein 1, 75kDa (NADH-coenzyme Q reductase) (NDUFS1), nuclear gene encoding mitochondrial protein, mRNA.	2	1.79244	0.128895	0.0402614	2.18836
6654	ACTGACCAGTACGTGTTG	ACACACTTGTTACCTATGATA	COX5A	Homo sapiens cytochrome c oxidase subunit Va (COX5A), nuclear gene encoding mitochondrial protein, mRNA.	1	1.79073	0.0374014	0.00528865	2.18355
14166	CATGCAGTACTGCAGTAC	GCTCTTGTTCAGGATGGAATT	IL1R1	Homo sapiens interleukin 1 receptor, type I (IL1R1), mRNA.	1	1.79035	0.0609549	0.0463503	2.18248
9231	ACTGCAACGTGTGTCACA	CACGATGGAGAGAGCCTTATA	ENPEP	Homo sapiens glutamyl aminopeptidase (aminopeptidase A) (ENPEP), mRNA.	1	1.78897	0.0560443	0.0221217	2.17856
17395	TGCAGTGTTGCAACGTAC	AGGCTTATCTATCATGTGCTA	MYF5	Homo sapiens myogenic factor 5 (MYF5), mRNA.	1	1.78543	0.155504	0.0210215	2.1686
21416	GTCAGTTGACCACATGGT	AGATGCGAAATGGATATGAAT	PSMB2	Homo sapiens proteasome (prosome, macropain) subunit, beta type, 2 (PSMB2), mRNA.	1	1.78522	0.219026	0.0413227	2.16798
776	GTTGCATGACCAGTGTGT	GCGAGAGAATATGTCACATTT	ADAMTS13	Homo sapiens ADAM metallopeptidase with thrombospondin type 1 motif, 13 (ADAMTS13), transcript variant 1, mRNA.	1	1.77953	4.46761e-05	0.0356765	2.15194
12248	ACTGGTACACGTACCACA	GAACCAGGTTATGGATAACCA	GSTM5	Homo sapiens glutathione S-transferase M5 (GSTM5), mRNA.	1	1.77759	0.0169632	0.0445164	2.14645
5814	TGCAGTGTCACAACCAGT	TACAGTGGGAGATCCAGAATA	CHPF	Homo sapiens chondroitin polymerizing factor (CHPF), mRNA.	1	1.77622	0.00939858	0.0205728	2.14259
1730	CACAGTACTGCAACCATG	GCTCCAGTTACGCTGTGTAAA	ANAPC1	PREDICTED: Homo sapiens anaphase promoting complex subunit 1 (ANAPC1), mRNA.	1	1.77431	0.0407931	0.00422274	2.13722
2006	ACCAACCAACTGCAGTAC	CCACAAGGTTTGTGACATATT	API5	Homo sapiens apoptosis inhibitor 5 (API5), mRNA.	1	1.77407	0.0260566	0.000580702	2.13653
20485	GTTGCACACAGTGTGTGT	CCTGAAGCATTACAGTGACTT	POLL	Homo sapiens polymerase (DNA directed), lambda (POLL), mRNA.	1	1.77395	0.192921	0.0377442	2.13618
17187	TGCAACCAGTTGACGTCA	GCGCATCTTGTTGGACATATT	MTA1	Homo sapiens metastasis associated 1 (MTA1), mRNA.	1	1.7726	0.0266887	0.022676	2.13238
23302	TGTGTGACTGACACGTCA	CCGCTTTGCTACCACTTTCTA	SERPINC1	Homo sapiens serpin peptidase inhibitor, clade C (antithrombin), member 1 (SERPINC1), mRNA.	1	1.77252	0.0160968	0.00960076	2.13215
1131	ACTGTGCAGTTGTGGTGT	CAAGGATATGTACCAGATCAT	AGXT	Homo sapiens alanine-glyoxylate aminotransferase (AGXT), mRNA.	1	1.77065	0.0592782	0.0124599	2.12687
4007	CAGTCAGTGTACACCACA	GTGATAACAAGGGAGTCATTT	CA12	Homo sapiens carbonic anhydrase XII (CA12), transcript variant 1, mRNA.	1	1.76983	0.120273	0.0261783	2.12457
1602	CATGACGTGTTGGTCAAC	CCACCACCATACACACACACA	ALOX15B	Homo sapiens arachidonate 15-lipoxygenase, type B (ALOX15B), transcript variant b, mRNA.	1	1.76859	0.046058	0.00399854	2.12107
10484	TGACCAGTACCAGTGTTG	CCTGAAGTTTGTGGAACAGAA	FSTL1	Homo sapiens follistatin-like 1 (FSTL1), mRNA.	1	1.76782	0.0793997	0.00802756	2.1189
6950	TGCAGTCACAACTGCACA	CGCCTGTAATCCCAGCACTTT	CSF2RA	Homo sapiens colony stimulating factor 2 receptor, alpha, low-affinity (granulocyte-macrophage) (CSF2RA), transcript variant 6, mRNA.	1	1.76772	0.0442639	0.0440865	2.11862
13990	ACCAACGTGTGTACGTGT	GCTCTCGTACTGGACAGATTA	IKZF3	Homo sapiens IKAROS family zinc finger 3 (Aiolos) (IKZF3), transcript variant 1, mRNA.	1	1.76417	0.207899	0.0400296	2.10859
24265	TGTGCATGTGTGGTGTCA	CCCACAGTTGAGTGGCATATA	SOS1	Homo sapiens son of sevenless homolog 1 (Drosophila) (SOS1), mRNA.	1	1.76413	0.0248016	0.00304539	2.10847
5650	TGACGTACTGCAGTGTGT	ACTGGCACCATAGATGTTAAA	CETN2	Homo sapiens centrin, EF-hand protein, 2 (CETN2), mRNA.	1	1.76219	0.141973	0.0201905	2.10299
15143	CATGGTCACACACAGTGT	CCATTTCTTGTAGCTGTTGTT	KERA	Homo sapiens keratocan (KERA), mRNA.	1	1.76006	0.0452473	0.00189524	2.09699
8917	ACGTCACAACGTTGGTCA	CGAGTCAATAACGCCAGCTAT	EHMT1	PREDICTED: Homo sapiens euchromatic histone-lysine N-methyltransferase 1, transcript variant 4 (EHMT1), mRNA.	1	1.75748	0.149979	0.0235376	2.08971
8492	CACATGGTACACTGGTTG	CGGCTGCATATTGGTGTCAAA	DPYD	Homo sapiens dihydropyrimidine dehydrogenase (DPYD), transcript variant 1, mRNA.	1	1.75685	0.211055	0.0367943	2.08794
8990	TGACTGGTTGGTACCAGT	GCCAGAGAATAGATCAGTATT	EIF2S1	Homo sapiens eukaryotic translation initiation factor 2, subunit 1 alpha, 35kDa (EIF2S1), mRNA.	1	1.7547	0.0912569	0.0381833	2.08187
27479	TGACGTGTACTGACCACA	GCTGGGTATTACCATGTAAAT	ZMYM2	Homo sapiens zinc finger, MYM-type 2 (ZMYM2), mRNA.	1	1.74937	0.144182	0.0221846	2.06683
16570	CATGACACGTGTACGTTG	GCTCAAGTTCAAGTTTCTGTA	MBTPS2	Homo sapiens membrane-bound transcription factor peptidase, site 2 (MBTPS2), mRNA.	1	1.74904	0.024226	0.0120383	2.06589
22637	TGTGTGACTGGTCATGAC	CCCGATTTAAGTAGTGACATT	ROCK1	Homo sapiens Rho-associated, coiled-coil containing protein kinase 1 (ROCK1), mRNA.	1	1.74841	0.186416	0.0364863	2.06413
11491	CACATGGTTGGTGTGTCA	CGCATCTTTGAGGATGTCAAA	GLS2	Homo sapiens glutaminase 2 (liver, mitochondrial) (GLS2), nuclear gene encoding mitochondrial protein, mRNA.	1	1.74677	0.0352402	0.0106789	2.05949
16313	TGACACCAGTCAACCACA	TGATTGTTCACCGGGACATTA	MAP3K3	Homo sapiens mitogen-activated protein kinase kinase kinase 3 (MAP3K3), transcript variant 1, mRNA.	1	1.74437	0.0332345	0.00166878	2.05271
8336	CATGGTTGCAGTTGCATG	GCTGCTATAGGGCTGGTATCT	DNAJB4	Homo sapiens DnaJ (Hsp40) homolog, subfamily B, member 4 (DNAJB4), mRNA.	1	1.74272	0.118575	0.0181719	2.04806
16507	ACCATGTGACCAGTGTCA	GCTGGCTTTGACAATGACATA	MASP2	Homo sapiens mannan-binding lectin serine peptidase 2 (MASP2), transcript variant 1, mRNA.	1	1.74214	0.109206	0.014641	2.04642
20256	CAACCAACACACACGTAC	CCGGATCAAGAAGAATGAATA	PLK1	Homo sapiens polo-like kinase 1 (Drosophila) (PLK1), mRNA.	3	1.74038	0.201784	0.0400079	2.04147
8014	CACAGTACGTCACATGTG	GCTGACCACCAGGAACTATAT	DGAT2	Homo sapiens diacylglycerol O-acyltransferase homolog 2 (mouse) (DGAT2), mRNA.	1	1.73481	0.0979942	0.0170752	2.02575
9232	ACACCAGTTGGTCATGTG	CGTGCATAGAACCAGAACATA	ENPP1	Homo sapiens ectonucleotide pyrophosphatase/phosphodiesterase 1 (ENPP1), mRNA.	1	1.73464	0.216904	0.0409558	2.02524
11970	GTGTGTGTTGACACCACA	GCCTGTGTACACACACAACTT	GRAP2	Homo sapiens GRB2-related adaptor protein 2 (GRAP2), mRNA.	1	1.73011	0.181146	0.0295115	2.01246
14456	TGTGCAACGTTGCATGCA	CTCTTCAACGTGGGCATCAAT	INPP4A	Homo sapiens inositol polyphosphate-4-phosphatase, type I, 107kDa (INPP4A), transcript variant b, mRNA.	1	1.72967	0.0124442	0.00729946	2.01123
17794	CAGTACGTGTGTCAGTAC	CCATGATGTTTGGAAATGATA	NDUFS1	Homo sapiens NADH dehydrogenase (ubiquinone) Fe-S protein 1, 75kDa (NADH-coenzyme Q reductase) (NDUFS1), nuclear gene encoding mitochondrial protein, mRNA.	2	1.72806	0.112465	0.0164929	2.00668
22122	ACACGTACCAGTCATGGT	GCTTGTCAGAATCCAGGTAAA	RANBP2	Homo sapiens RAN binding protein 2 (RANBP2), mRNA.	1	1.72776	0.0773925	0.00672392	2.00584
4514	CATGACACCACACAGTGT	CGTTCACTTGTACTGTAACAA	CAV3	Homo sapiens caveolin 3 (CAV3), transcript variant 1, mRNA.	1	1.72776	0.13942	0.0250233	2.00584
