# Supplementary material for: The kinesin motor KIF11 coordinates NLR localization and activation in the innate immune response
Source: Research Square preprint supplement (doi:10.21203/rs.3.rs-8293641/v1), 2026-01-06
Supplement: Supplementary file 3 [file 469e302e7669a5e61c2a2338.xlsx]

## Sheet: z-Score>2,p<0.05
#	Barcode Sequence	mRNA Target Sequence	Gene Symbol	Definition	Redundancy	Fc(ave)	stdev	t-test	z-Score
16621	TGCATGACGTTGCACAGT	CGATACTACCTACGGCAAATT	PLK1	Homo sapiens polo-like kinase 1 (Drosophila) (PLK1), mRNA.	2	12.5295	1.09214	0.0174782	23.8527
11056	GTACTGCAGTTGCACACA	GGATCCCTTGGCTGGTATAAT	KIF11	Homo sapiens kinesin family member 11 (KIF11), mRNA.	4	12.2666	0.610178	0.00581548	23.3058
15043	TGTGACGTGTGTCAACTG	GAAGTATCAGAAGTACCAAAT	NUF2	Homo sapiens NUF2, NDC80 kinetochore complex component, homolog (S. cerevisiae) (NUF2), transcript variant 2, mRNA.	4	12.1897	0.150749	0.000363177	23.1457
11044	CATGACGTGTTGCACACA	CCGATAAGATAGAAGATCAAA	KIF11	Homo sapiens kinesin family member 11 (KIF11), mRNA.	4	10.6787	0.143939	0.000443994	20.0022
11046	TGGTACGTGTTGCACACA	GCGTACAAGAACATCTATAAT	KIF11	Homo sapiens kinesin family member 11 (KIF11), mRNA.	4	10.2291	0.930337	0.0197318	19.0668
13104	CATGTGGTGTACACACGT	CAGAACACTAACATCGACAAT	MED29	Homo sapiens mediator complex subunit 29 (MED29), mRNA.	1	8.24681	0.18784	0.00135583	14.9427
14779	CACATGTGGTTGCAACAC	CTACTTGGCCGTAAGGCTAAA	NOL7	Homo sapiens nucleolar protein 7, 27kDa (NOL7), mRNA.	1	7.53425	0.888306	0.0350403	13.4603
15045	CATGACGTGTGTCAACGT	CCAAGCGTTTGAATGAACTAA	NUF2	Homo sapiens NUF2, NDC80 kinetochore complex component, homolog (S. cerevisiae) (NUF2), transcript variant 2, mRNA.	4	7.22091	0.0134807	1.01212e-05	12.8084
24761	CACATGACTGACCAACGT	CGTGGAACTCACATTCAATGA	WBP2	Homo sapiens WW domain binding protein 2 (WBP2), mRNA.	1	6.95915	0.209346	0.00257539	12.2638
20904	CATGTGCACAACGTACAC	GCCTACTACAACACTGGTGTT	SON	Homo sapiens SON DNA binding protein (SON), transcript variant e, mRNA.	4	6.84888	0.821508	0.0372757	12.0344
20681	CACAGTACCACATGACCA	CCGCATAAATGAGGATCAGAA	SNAPIN	Homo sapiens SNAP-associated protein (SNAPIN), mRNA.	1	6.36446	0.132676	0.00124716	11.0266
2572	CAACCAGTACACTGTGGT	TTGATAAACTTCACGAATTTG	C1ORF49	Homo sapiens chromosome 1 open reading frame 49 (C1orf49), mRNA.	1	6.22757	0.425648	0.0131233	10.7418
4198	ACGTACACCACAGTACTG	GAGAGAACCTATTGCCTTAAT	CEP192	Homo sapiens centrosomal protein 192kDa (CEP192), mRNA.	1	6.12201	0.092907	0.000658304	10.5221
12834	CATGACCACATGTGTGGT	CTCCTTCTACCTGCAGTCAAA	MAGMAS	Homo sapiens mitochondria-associated protein involved in granulocyte-macrophage colony-stimulating factor signal transduction (Magmas), nuclear gene encoding mitochondrial protein, mRNA.	1	5.9501	0.102888	0.00101251	10.1645
15046	ACGTACGTGTGTCAACTG	CTACATGAGAGCCTTACAAAT	NUF2	Homo sapiens NUF2, NDC80 kinetochore complex component, homolog (S. cerevisiae) (NUF2), transcript variant 2, mRNA.	4	5.45068	0.100244	0.00101737	9.12548
25493	CAGTGTCAGTGTACACTG	GCAGTGAATGTGGAAAGACAT	ZFP1	Homo sapiens zinc finger protein 1 homolog (mouse) (ZFP1), mRNA.	1	5.2901	0.573178	0.0340427	8.79139
23098	CAACGTCACATGGTTGGT	GCCTGTAATGCCAACACTTTG	TMEM87A	Homo sapiens transmembrane protein 87A (TMEM87A), mRNA.	1	5.28178	0.047491	0.000247265	8.77408
3016	CAGTACGTGTTGCAACGT	GCTGGTTTAACCTGCGATTAT	C5ORF22	Homo sapiens chromosome 5 open reading frame 22 (C5orf22), mRNA.	1	5.06219	0.358943	0.0161026	8.31723
24811	CACATGACTGCATGTGGT	CCTCAGCATGGCTTTGTGTCT	WDR31	Homo sapiens WD repeat domain 31 (WDR31), transcript variant 3, mRNA.	1	5.01927	0.341826	0.0141653	8.22793
839	CAGTACACGTCATGTGAC	CTGGCTGGAAAGACTCCAGAA	ARAP3	Homo sapiens ArfGAP with RhoGAP domain, ankyrin repeat and PH domain 3 (ARAP3), mRNA.	1	5.00391	0.602253	0.0424563	8.19598
19720	CACAACACACACACACTG	CGAGACACTGAAAGGAACAAA	SF3A3	Homo sapiens splicing factor 3a, subunit 3, 60kDa (SF3A3), mRNA.	1	4.99502	0.566732	0.0379745	8.17748
7281	GTCATGTGACTGGTTGGT	GCACGCATACACACACACACA	FAM5B	Homo sapiens family with sequence similarity 5, member B (FAM5B), mRNA.	1	4.88404	0.448977	0.0257086	7.94659
4568	GTTGTGCATGCAGTACCA	GCTGGCATTGAACTGGATGAA	CLIP4	Homo sapiens CAP-GLY domain containing linker protein family, member 4 (CLIP4), mRNA.	1	4.66919	0.432761	0.0267731	7.4996
15101	ACCAGTGTCAACACACAC	GCGGGAATTGGACAAGATAAA	NXF1	Homo sapiens nuclear RNA export factor 1 (NXF1), transcript variant 1, mRNA.	1	4.54656	0.367107	0.0207785	7.24447
25888	CATGCAACTGTGACACGT	CCAGAGTTCCAAACTCCTCAT	ZNF239	Homo sapiens zinc finger protein 239 (ZNF239), transcript variant 4, mRNA.	1	4.36549	0.326467	0.0183183	6.86776
6602	CAGTTGCACATGGTACGT	GCTACTTGTGTCCTAGGGTTT	EML2	Homo sapiens echinoderm microtubule associated protein like 2 (EML2), mRNA.	1	4.36262	0.477399	0.0380512	6.86179
12043	CAACACCAACGTGTTGCA	CAGGGTGGAAGTAGTGTGTAC	LOC283143	PREDICTED: Homo sapiens hypothetical protein LOC283143 (LOC283143), miscRNA.	1	4.2696	0.075872	0.00118814	6.66826
4414	TGGTACGTACACTGACCA	CGACCTGATGCGCTCTATCTT	CHST5	Homo sapiens carbohydrate (N-acetylglucosamine 6-O) sulfotransferase 5 (CHST5), mRNA.	1	4.14141	0.206436	0.00879409	6.40157
8301	CAGTTGCAGTACCAACTG	CAACCACGTCAAGACAACAAT	GFRAL	Homo sapiens GDNF family receptor alpha like (GFRAL), mRNA.	1	4.11794	0.00472519	5.77996e-05	6.35273
2000	GTGTACGTGTACACTGAC	GCAAACTGAATTTGCTCCAGA	C11ORF46	Homo sapiens chromosome 11 open reading frame 46 (C11orf46), mRNA.	1	4.08715	0.139419	0.00413988	6.28868
17055	CACAACACTGACTGACTG	CCGGCTATGTAGTGTATAAGT	PRODH2	Homo sapiens proline dehydrogenase (oxidase) 2 (PRODH2), mRNA.	1	4.01668	0.345408	0.0252752	6.14206
26483	GTGTGTTGGTGTACTGGT	GCGAGATCTTTAGTAGCAATT	ZNF534	PREDICTED: Homo sapiens zinc finger protein 534 (ZNF534), mRNA.	1	3.99734	0.0458254	0.000469351	6.10184
19878	CATGTGTGTGCATGTGCA	GCTCTAGGCCAAACCACAGTT	SGSM3	Homo sapiens small G protein signaling modulator 3 (SGSM3), mRNA.	1	3.94442	0.251035	0.0144084	5.99174
6038	TGCAGTTGGTCATGTGTG	CAGGCTCAGAGGATCTTCGTA	DPRX	Homo sapiens divergent-paired related homeobox (DPRX), mRNA.	1	3.94355	0.105741	0.0025849	5.98993
22280	TGGTACACTGACGTACGT	GCAGTGGATTACCTAGAAATA	TDRD3	Homo sapiens tudor domain containing 3 (TDRD3), mRNA.	1	3.72202	0.190269	0.00963566	5.52904
26011	CATGACCAGTGTACTGTG	TGAAGGCTGTGACCGTATATA	ZNF292	Homo sapiens zinc finger protein 292 (ZNF292), mRNA.	2	3.72059	0.382376	0.0373109	5.52606
7654	TGCACAGTGTCATGACCA	CGTCTGTTGAAGATCTTCAAA	FEZ2	Homo sapiens fasciculation and elongation protein zeta 2 (zygin II) (FEZ2), transcript variant 1, mRNA.	2	3.70929	0.419095	0.044721	5.50256
12654	TGTGTGCAACCAGTTGCA	GTGATTGGATCGTGTGGTACA	LYNX1	Homo sapiens Ly6/neurotoxin 1 (LYNX1), transcript variant 4, mRNA.	1	3.64347	0.304201	0.0254775	5.36562
27103	CACAGTACTGGTTGTGAC	GCGTTAAGTGTTCATCTATGT	ZNF804A	Homo sapiens zinc finger protein 804A (ZNF804A), mRNA.	1	3.61736	0.170051	0.00835808	5.31129
11561	ACGTCAGTGTCAACTGTG	TGTACCTGTCTGCTGCTGCAA	KRTAP5-3	Homo sapiens keratin associated protein 5-3 (KRTAP5-3), mRNA.	1	3.61263	0.392346	0.0422673	5.30146
16589	CACAGTACACTGTGACCA	CGCCTGGCATATCAATGACAT	PLEKHG1	Homo sapiens pleckstrin homology domain containing, family G (with RhoGef domain) member 1 (PLEKHG1), mRNA.	1	3.59632	0.411205	0.0466957	5.26753
19840	ACGTCAGTTGGTGTACTG	GCGGTAGGAATGGTGCTTAAA	SFXN3	Homo sapiens sideroflexin 3 (SFXN3), mRNA.	1	3.57136	0.2095	0.0131256	5.2156
23205	CAACGTGTTGCATGTGCA	GAGCTCCTGCTTCATGCTTCT	TNNI1	Homo sapiens troponin I type 1 (skeletal, slow) (TNNI1), mRNA.	1	3.52901	0.130634	0.00529568	5.12748
4182	TGCATGCAGTCAGTACTG	GAGACTCAGATACAAGCATTA	CEP152	Homo sapiens centrosomal protein 152kDa (CEP152), mRNA.	1	3.52317	0.0919508	0.00266316	5.11534
231	CAACGTTGGTTGCACAGT	CGAGAAGATGACCCAGATCAT	ACTB	Homo sapiens actin, beta (ACTB), mRNA.	1	3.50393	0.241507	0.0184014	5.07531
2741	CACACAGTCAGTTGTGTG	CCAAGGAAGAACTTCTCTTCG	C20ORF79	Homo sapiens chromosome 20 open reading frame 79 (C20orf79), mRNA.	1	3.43682	0.124663	0.00521885	4.93569
11578	GTACACGTACGTTGTGAC	GCTATGGGTGCTGTGGATACG	KRTAP6-2	Homo sapiens keratin associated protein 6-2 (KRTAP6-2), mRNA.	1	3.39767	0.216546	0.0159294	4.85423
11058	ACTGTGCAGTTGCACATG	GAAGTACATAAGACCTTATTT	KIF11	Homo sapiens kinesin family member 11 (KIF11), mRNA.	4	3.38078	0.186142	0.0120502	4.81911
2187	ACGTACCAACACCAACTG	GAAGCCCTACTACACCAAAGT	C14ORF2	Homo sapiens chromosome 14 open reading frame 2 (C14orf2), mRNA.	1	3.37667	0.122925	0.00536326	4.81054
25353	ACGTTGGTACCACAACGT	GCCTTGTTTCTAGTGTGTATA	ZC3H7B	Homo sapiens zinc finger CCCH-type containing 7B (ZC3H7B), mRNA.	1	3.35324	0.341204	0.0411247	4.76179
22325	CAGTCATGGTCATGACTG	CTGTGTCAACAACCCTCCATT	TEX101	Homo sapiens testis expressed 101 (TEX101), mRNA.	1	3.32339	0.089507	0.00299051	4.6997
19188	GTTGGTACACCAGTACCA	GCTGTTCAGATGGTACAAGTA	SAMSN1	Homo sapiens SAM domain, SH3 domain and nuclear localization signals 1 (SAMSN1), mRNA.	1	3.29058	0.299201	0.0331117	4.63145
3629	GTTGTGGTGTACCAACAC	CATGATTTCAGCTTCTACCTT	CCDC109B	Homo sapiens coiled-coil domain containing 109B (CCDC109B), mRNA.	1	3.2379	0.102991	0.00584245	4.52184
20906	TGTGCAGTGTACTGTGTG	ACAGCGCTGGAATCCTATAAT	SON	Homo sapiens SON DNA binding protein (SON), transcript variant e, mRNA.	4	3.22827	0.0722617	0.00212294	4.5018
9956	GTGTTGTGACCAACTGTG	AGCTCCCTCTTTCAAAGTATA	IGF2AS	Homo sapiens insulin-like growth factor 2 antisense (IGF2AS), mRNA.	1	3.19157	0.143903	0.00854399	4.42545
14383	CAACGTTGTGCAACTGGT	GTGCACACGGAAGGAGTATTT	NBEAL2	Homo sapiens neurobeachin-like 2 (NBEAL2), mRNA.	1	3.18083	0.0895124	0.00341189	4.4031
10325	CATGGTCACAGTCAACAC	GTTATTCAAGATGGAGTCAGA	ISCA1	Homo sapiens iron-sulfur cluster assembly 1 homolog (S. cerevisiae) (ISCA1), mRNA.	1	3.15818	0.292505	0.0348494	4.35598
15875	CACAACGTCATGTGACAC	GCACCATTTGAAGAGTCACTA	PARP14	Homo sapiens poly (ADP-ribose) polymerase family, member 14 (PARP14), mRNA.	1	3.14233	0.103851	0.00475613	4.323
1618	CATGGTCAGTGTGTACGT	CCACCACACTTCTGAAGAATA	BEND6	Homo sapiens BEN domain containing 6 (BEND6), mRNA.	1	3.13786	0.0761629	0.00253291	4.31371
19313	TGGTGTTGCATGCAACAC	GTTGCCAAACTTAATCCACCT	SCGB1D4	Homo sapiens secretoglobin, family 1D, member 4 (SCGB1D4), mRNA.	1	3.12201	0.343267	0.0486556	4.28074
5467	TGTGACCAGTTGTGACCA	GCGGAGTTTCAGTAAAGCATT	DDX21	Homo sapiens DEAD (Asp-Glu-Ala-Asp) box polypeptide 21 (DDX21), mRNA.	1	3.08776	0.248786	0.0272451	4.20947
4175	ACACACGTTGACACTGTG	CGAATCATTGTTGGCTACAAA	CEP135	Homo sapiens centrosomal protein 135kDa (CEP135), mRNA.	1	3.08084	0.10946	0.00552823	4.19508
25557	TGACCAGTCACAACACAC	GTGTATGATACGCGGGATGAT	ZFPL1	Homo sapiens zinc finger protein-like 1 (ZFPL1), mRNA.	1	3.07325	0.0862862	0.00370642	4.17928
25750	CATGTGTGCAGTTGTGCA	GCAGGATGCTCATAGTGGTTT	ZNF167	Homo sapiens zinc finger protein 167 (ZNF167), transcript variant 2, mRNA.	1	3.07238	0.0995883	0.00556046	4.17749
12707	TGTGGTACTGCAACTGCA	TCAAGGAGGGTCAGTACAATT	MACC1	Homo sapiens metastasis associated in colon cancer 1 (MACC1), mRNA.	1	3.06848	0.301855	0.040215	4.16937
3328	ACTGCACAACGTACTGTG	CCTCCAGAATTAGGCATCATT	C9ORF47	Homo sapiens chromosome 9 open reading frame 47 (C9orf47), mRNA.	1	3.06788	0.297087	0.0388977	4.16812
22254	CACAGTGTGTTGCAACTG	GCAGATACTAACAGAAAGTCT	TCTE3	Homo sapiens t-complex-associated-testis-expressed 3 (TCTE3), mRNA.	1	3.06643	0.205834	0.0194382	4.16511
12853	CAGTGTGTGTCAGTACCA	GAGGTAGATGAGAGTGACATA	MAK16	Homo sapiens MAK16 homolog (S. cerevisiae) (MAK16), mRNA.	1	3.06319	0.220263	0.0220461	4.15836
16108	CAGTTGACCACATGTGGT	CTCTGTGGGACACTGTCAACA	PDCD11	Homo sapiens programmed cell death 11 (PDCD11), mRNA.	1	3.05129	0.000230214	0.00022744	4.13361
24590	TGTGACTGGTACTGACCA	CCCAGAAAGTTCCAGATCAAA	VPS13D	Homo sapiens vacuolar protein sorting 13 homolog D (S. cerevisiae) (VPS13D), transcript variant 1, mRNA.	1	3.02438	0.0304983	0.000467035	4.07762
23114	CAACTGGTCATGGTACCA	AGCGTGATTAAACCCACACAA	TMOD1	Homo sapiens tropomodulin 1 (TMOD1), mRNA.	1	3.01809	0.115445	0.00705008	4.06452
3802	ACGTACACTGACTGTGTG	CGAGCCTAAATCGCCAGTTAG	CCDC88C	Homo sapiens coiled-coil domain containing 88C (CCDC88C), mRNA.	1	2.98849	0.255491	0.0315411	4.00294
9996	TGACACTGGTGTGTACCA	CCACCTCATCTTTCCTTCGTT	IGSF9	Homo sapiens immunoglobulin superfamily, member 9 (IGSF9), mRNA.	1	2.97261	0.0121182	0.000218715	3.96992
11197	TGGTTGCATGTGACTGTG	GAGACACAGCTATCACACTGA	KIRREL2	Homo sapiens kin of IRRE like 2 (Drosophila) (KIRREL2), transcript variant 1, mRNA.	1	2.9685	0.0507972	0.00134639	3.96136
20905	ACGTTGCACAACGTACCA	GCCAGAATCTTCAATTACGTT	SON	Homo sapiens SON DNA binding protein (SON), transcript variant e, mRNA.	4	2.95904	0.0692073	0.00250345	3.94168
21045	ACACTGGTTGGTTGTGTG	CTGGTGAGCTAATAAACACCA	SPATA21	Homo sapiens spermatogenesis associated 21 (SPATA21), mRNA.	1	2.95386	0.0144883	0.000234929	3.9309
8041	TGACACCAACACTGTGTG	CGACTTACGGTGTCCATTATT	FRMD4B	PREDICTED: Homo sapiens FERM domain containing 4B, transcript variant 2 (FRMD4B), mRNA.	2	2.9517	0.0826829	0.00357475	3.92641
18830	TGCACACAACGTGTACCA	GCAGGTTTAATGGCCAGTTTA	RPS21	Homo sapiens ribosomal protein S21 (RPS21), mRNA.	1	2.9512	0.0541665	0.00166076	3.92537
19737	CAACTGACACACACACTG	AGACAGATGAAGATATGGTTA	SF3B3	Homo sapiens splicing factor 3b, subunit 3, 130kDa (SF3B3), mRNA.	1	2.94775	0.300118	0.044386	3.91819
12728	ACGTGTACGTCAGTACAC	CGACGTGATGAACGAGAACAA	MAEA	Homo sapiens macrophage erythroblast attacher (MAEA), transcript variant 1, mRNA.	1	2.94735	0.286338	0.0407244	3.91735
15071	TGCAACTGCAGTTGACGT	CCTGGAGTCATAGATAAGTTT	NUP93	Homo sapiens nucleoporin 93kDa (NUP93), mRNA.	2	2.94567	0.0418923	0.00101458	3.91386
10940	TGTGGTACACGTACTGTG	GCTTCTTGAATAACCTTGATA	KIAA1467	Homo sapiens KIAA1467 (KIAA1467), mRNA.	1	2.93889	0.312663	0.0485289	3.89977
13435	CAACTGTGGTACACACCA	CCCTCCTGTTTACAAGATTCT	MOGAT2	Homo sapiens monoacylglycerol O-acyltransferase 2 (MOGAT2), mRNA.	1	2.90405	0.253913	0.0337764	3.82727
17179	GTACGTACTGCAACACTG	GCACAGAGGAACGAACTAAAT	PSMC5	Homo sapiens proteasome (prosome, macropain) 26S subunit, ATPase, 5 (PSMC5), mRNA.	1	2.90057	0.185674	0.0185604	3.82004
3257	CATGACGTCATGCAACAC	GCTCTGTAACTTGCATGACAT	C9ORF103	Homo sapiens chromosome 9 open reading frame 103 (C9orf103), mRNA.	1	2.88762	0.243651	0.0319729	3.7931
5888	GTACTGTGACTGACTGTG	CCCAGTTTACATTTGGTCTTA	DNAJC9	Homo sapiens DnaJ (Hsp40) homolog, subfamily C, member 9 (DNAJC9), mRNA.	1	2.87886	0.0562022	0.00179285	3.77487
19435	CACATGACTGGTTGACGT	CCGGAGGAAGCTGATGGTCAT	SDF4	Homo sapiens stromal cell derived factor 4 (SDF4), mRNA.	1	2.87793	0.273439	0.0398891	3.77292
2823	GTTGGTGTGTCAGTACCA	CTTTCATCAGTGTGCCGGAAA	C2CD2	Homo sapiens C2 calcium-dependent domain containing 2 (C2CD2), transcript variant 1, mRNA.	1	2.87498	0.0575469	0.00204988	3.76679
8155	CACAACACCAACACACCA	GCAAGCTACAACACAGGATAA	GAPVD1	Homo sapiens GTPase activating protein and VPS9 domains 1 (GAPVD1), mRNA.	1	2.87143	0.137629	0.0109576	3.75942
3382	TGACCAGTACACACTGGT	CCCAACATGTGGAACAATAAA	C9ORF95	Homo sapiens chromosome 9 open reading frame 95 (C9orf95), mRNA.	1	2.86758	0.166674	0.0158818	3.75141
5615	CAGTCAACACCAACTGCA	TGAGAGGACAGAGGCTATATG	DEPDC6	Homo sapiens DEP domain containing 6 (DEPDC6), mRNA.	1	2.85883	0.23183	0.0298112	3.7332
7390	ACGTTGGTTGACTGACGT	CCGGCATATAAGCTGAGCATA	FAT1	Homo sapiens FAT tumor suppressor homolog 1 (Drosophila) (FAT1), mRNA.	1	2.85865	0.113367	0.0073673	3.73283
6694	CACATGCACAGTTGACTG	GCCTCTGCAGATGATTGTGAA	EPS8L1	Homo sapiens EPS8-like 1 (EPS8L1), transcript variant 1, mRNA.	1	2.8547	0.00215296	1.11331e-05	3.72461
3814	CATGGTTGCAGTCAACTG	GCTGCGAATGTGAAGCTATTA	CCDC99	Homo sapiens coiled-coil domain containing 99 (CCDC99), mRNA.	1	2.84824	0.255531	0.0361845	3.71117
22172	GTCACAACACACTGTGTG	CAACACCCATGAGAACTAAAT	TCEANC	Homo sapiens transcription elongation factor A (SII) N-terminal and central domain containing (TCEANC), mRNA.	1	2.80968	0.118775	0.00864719	3.63094
4591	GTACACACACTGTGACCA	GCCCATCCACATGTACATCAA	CLPP	Homo sapiens ClpP caseinolytic peptidase, ATP-dependent, proteolytic subunit homolog (E. coli) (CLPP), nuclear gene encoding mitochondrial protein, mRNA.	1	2.79977	0.212495	0.0267675	3.61033
19034	CACACAACACCATGACAC	GCTGCTCACAGAGCACGTGTT	RTN4RL2	Homo sapiens reticulon 4 receptor-like 2 (RTN4RL2), mRNA.	1	2.79373	0.00224577	9.06745e-05	3.59775
19731	GTGTCAACCAACACACAC	GCTGATGTTGAGATTGAGTAT	SF3B2	Homo sapiens splicing factor 3b, subunit 2, 145kDa (SF3B2), mRNA.	1	2.78532	0.0359995	0.00102578	3.58026
13898	GTCAACGTCAACGTTGGT	CAGCTCTTCTCCCAGATGTTA	MT1M	Homo sapiens metallothionein 1M (MT1M), mRNA.	1	2.77324	0.173784	0.0189836	3.55513
4843	TGACGTACCACATGACCA	CCATCGGACTGACAGTGAAAT	COPZ1	Homo sapiens coatomer protein complex, subunit zeta 1 (COPZ1), mRNA.	1	2.76693	0.0387674	0.00097018	3.54201
12311	GTCAGTGTTGCAACTGAC	CGAGTAGCAGAGATTACTAAA	LRCH3	Homo sapiens leucine-rich repeats and calponin homology (CH) domain containing 3 (LRCH3), mRNA.	1	2.76034	0.286401	0.0491144	3.52828
24001	CAGTGTCACAACACACGT	CCGTTGGAACAAGATTGTCCT	UBL5	Homo sapiens ubiquitin-like 5 (UBL5), transcript variant 2, mRNA.	1	2.75014	0.187554	0.023014	3.50706
23505	GTACTGCAACACTGACCA	CGCAGAGATCTCACTATAAAT	TRNT1	Homo sapiens tRNA nucleotidyl transferase, CCA-adding, 1 (TRNT1), mRNA.	1	2.74864	0.0189203	0.000322458	3.50395
14969	GTGTTGGTTGTGACTGGT	CCACTTGCTTTAGCCCATTAT	NTM	Homo sapiens neurotrimin (NTM), transcript variant 2, mRNA.	1	2.74841	0.0433221	0.00137774	3.50347
20633	CAGTCAACTGACACTGTG	GACTGCAAGCATCATGTTGAT	SMYD5	Homo sapiens SMYD family member 5 (SMYD5), mRNA.	1	2.74268	0.202459	0.0259589	3.49154
10753	CATGTGCAACTGGTTGGT	CGCAGGATCTGTGAACTTTGC	KIAA0146	Homo sapiens KIAA0146 (KIAA0146), mRNA.	1	2.74234	0.0102203	0.000115893	3.49084
8086	TGACTGGTTGTGACACCA	GCGCACCAAACTGCTACTTAT	FXR2	Homo sapiens fragile X mental retardation, autosomal homolog 2 (FXR2), mRNA.	1	2.72773	0.275673	0.0473316	3.46044
3607	GTGTGTTGACACTGACTG	CCACCAAACCATCATTTGAAA	CCBL2	Homo sapiens cysteine conjugate-beta lyase 2 (CCBL2), transcript variant 1, mRNA.	1	2.72155	0.0469784	0.00154005	3.44758
802	ACTGTGTGACACTGTGTG	ACGGCCAGAAGAACAAGTACC	AQP12B	Homo sapiens aquaporin 12B (AQP12B), mRNA.	1	2.70882	0.144963	0.014205	3.42109
1086	CATGTGGTCACACAACTG	GATTGGTCTGACGTTCCGAAA	ARR3	Homo sapiens arrestin 3, retinal (X-arrestin) (ARR3), mRNA.	1	2.70323	0.104888	0.00774011	3.40948
10105	CAGTTGACGTGTCAACTG	GCATATCTCAAGACAATCAGA	IL31	Homo sapiens interleukin 31 (IL31), mRNA.	1	2.70032	0.072683	0.00386799	3.40341
23856	ACTGCATGACACACACTG	TGCAGATTAACCAGGACAAGA	U2AF2	Homo sapiens U2 small nuclear RNA auxiliary factor 2 (U2AF2), transcript variant 1, mRNA.	1	2.69984	0.259216	0.0435323	3.40243
4905	CAACGTCACAACTGACCA	AGGGATTAAAGCCTGTGGTTT	COX7A2L	Homo sapiens cytochrome c oxidase subunit VIIa polypeptide 2 like (COX7A2L), nuclear gene encoding mitochondrial protein, mRNA.	1	2.69359	0.0939094	0.00610952	3.38943
6437	GTCACACAACCATGACCA	GCAATCAAGCAGATCATCAAA	EIF4A3	Homo sapiens eukaryotic translation initiation factor 4A, isoform 3 (EIF4A3), mRNA.	2	2.67434	0.0727915	0.00393619	3.34937
13605	CATGTGGTGTACACTGTG	CTGAAGGATCTATATTCCCTT	MRPL15	Homo sapiens mitochondrial ribosomal protein L15 (MRPL15), nuclear gene encoding mitochondrial protein, mRNA.	1	2.67125	0.0792572	0.00446793	3.34295
18811	ACGTGTGTCAACTGTGTG	GCGCACGCTACAGTACAAGCT	RPS16	Homo sapiens ribosomal protein S16 (RPS16), mRNA.	1	2.65319	0.224815	0.0350542	3.30536
2623	TGACCATGTGACTGTGAC	CTGCCAGACAACCTATGTAAA	C1ORF68	Homo sapiens chromosome 1 open reading frame 68 (C1orf68), mRNA.	1	2.65083	0.09082	0.00599979	3.30045
2584	TGGTGTCATGACTGTGGT	AGAGCTTGACATGGCAATAAA	C1ORF52	Homo sapiens chromosome 1 open reading frame 52 (C1orf52), mRNA.	1	2.64525	0.260558	0.0466919	3.28886
1684	CACAGTCAACACTGTGCA	GCCTCTGGCAGTTCCATTTAT	BLID	Homo sapiens BH3-like motif containing, cell death inducer (BLID), mRNA.	1	2.6439	0.242938	0.0419145	3.28604
24412	CAGTTGGTCATGCAACAC	GCTGGATTAGATAATGCTGTA	UTP18	Homo sapiens UTP18, small subunit (SSU) processome component, homolog (yeast) (UTP18), mRNA.	1	2.64286	0.00201658	5.33344e-06	3.28387
6724	ACGTACGTGTGTTGACCA	CGAAGTACAATCCAGCGACAA	ERBB2IP	Homo sapiens erbb2 interacting protein (ERBB2IP), transcript variant 7, mRNA.	1	2.6323	0.155067	0.0175811	3.2619
21289	GTTGCAACACACACACTG	CCCAAAGTGAAGGCAATAATA	SRRM2	Homo sapiens serine/arginine repetitive matrix 2 (SRRM2), mRNA.	1	2.63132	0.125356	0.0117987	3.25986
6514	CAGTGTGTCATGTGACTG	GCAGGACTTTGAGACAGATTA	ELL3	Homo sapiens elongation factor RNA polymerase II-like 3 (ELL3), mRNA.	1	2.62766	0.0395826	0.00118673	3.25225
5015	GTACCATGTGCACAACAC	GCACAACTAACATCCAGTAAT	CRISP1	Homo sapiens cysteine-rich secretory protein 1 (CRISP1), transcript variant 1, mRNA.	1	2.62568	0.231629	0.0383029	3.24813
10082	CAGTCAACACGTTGTGTG	CCCTTTGATCCCAGCCATAAA	IL20RA	Homo sapiens interleukin 20 receptor, alpha (IL20RA), mRNA.	1	2.62517	0.0147412	0.000614739	3.24708
22695	CACAGTACCACAGTACGT	CCTGACAGGATACAAGATGAA	TMCO4	Homo sapiens transmembrane and coiled-coil domains 4 (TMCO4), mRNA.	1	2.61518	0.227622	0.0375351	3.22628
13142	CAGTCATGACTGTGTGCA	GCTGCCTGTGATGCCGTGAAT	MEGF6	Homo sapiens multiple EGF-like-domains 6 (MEGF6), mRNA.	1	2.59367	0.0385938	0.00117528	3.18154
11855	CAACCAGTTGGTTGACGT	GCGGTATCACTGTCAGTACTA	LILRA2	Homo sapiens leukocyte immunoglobulin-like receptor, subfamily A (with TM domain), member 2 (LILRA2), mRNA.	1	2.59283	0.0823456	0.0053121	3.17978
25326	CAACTGCACACAGTACGT	GCGTAAGAAGCCACTCACTTT	ZC3H12A	Homo sapiens zinc finger CCCH-type containing 12A (ZC3H12A), mRNA.	1	2.57506	0.164477	0.021188	3.14283
5372	CACAACACTGGTTGACCA	GCTCGACATCAGCTTGTAGTA	DCHS1	Homo sapiens dachsous 1 (Drosophila) (DCHS1), mRNA.	1	2.57385	0.0596126	0.00286723	3.14031
25247	CAGTACTGACCAGTACAC	GCCCTCAGATCATTGAACCAA	ZBTB37	Homo sapiens zinc finger and BTB domain containing 37 (ZBTB37), mRNA.	1	2.56328	0.0471997	0.00212053	3.11831
11707	CAACGTGTGTGTTGACTG	GCTGTCCACTGACTACAGCTA	LCN10	Homo sapiens lipocalin 10 (LCN10), mRNA.	1	2.5613	0.0349728	0.00100441	3.1142
1244	CAACACGTTGCACAACAC	GATGCCTTGAATCTTGGTTTA	ASTE1	Homo sapiens asteroid homolog 1 (Drosophila) (ASTE1), mRNA.	1	2.56109	0.0997885	0.00808148	3.11376
3836	TGCAGTACGTGTTGACGT	CCGAGTGGTCAGCTACCAGCT	CCL24	Homo sapiens chemokine (C-C motif) ligand 24 (CCL24), mRNA.	1	2.55966	0.145113	0.0172071	3.11078
4687	CACATGTGGTGTCAACTG	CCTGAAGGATGGAACTATCTT	CNN2	Homo sapiens calponin 2 (CNN2), transcript variant 2, mRNA.	1	2.5527	0.00201414	5.34301e-06	3.0963
16431	CAACACCAGTGTTGACAC	GCCGAAATTCTCCATTCATAT	PITPNC1	Homo sapiens phosphatidylinositol transfer protein, cytoplasmic 1 (PITPNC1), transcript variant 2, mRNA.	1	2.54801	0.177074	0.0261104	3.08655
21654	ACGTCAGTGTACGTACTG	GCGGAATGAAGCTCGTAAATT	SYF2	Homo sapiens SYF2 homolog, RNA splicing factor (S. cerevisiae) (SYF2), transcript variant 1, mRNA.	1	2.54619	0.129983	0.0139984	3.08276
3112	GTGTACCACATGCAACCA	CGAGTAAATGTAGAGTCATTA	C6ORF173	Homo sapiens chromosome 6 open reading frame 173 (C6orf173), mRNA.	1	2.54227	0.158988	0.0205998	3.0746
25123	ACGTGTTGGTCAACTGAC	TATGGGCTCTGGGATACAAAT	YLPM1	Homo sapiens YLP motif containing 1 (YLPM1), mRNA.	1	2.54129	0.214096	0.0390304	3.07257
479	ACGTACGTACCACAACCA	GAAACCCAGTAACAGAAACTT	ALS2CR8	Homo sapiens amyotrophic lateral sclerosis 2 (juvenile) chromosome region, candidate 8 (ALS2CR8), mRNA.	1	2.53789	0.233347	0.0430963	3.06548
26806	TGACTGCAGTGTACACCA	GTAACCTATGTGAGCATGAAA	ZNF670	Homo sapiens zinc finger protein 670 (ZNF670), mRNA.	1	2.53612	0.0328211	0.000953645	3.06181
25539	ACGTCAACACGTACACTG	CGAGGACAACTTACTCTGCAT	ZFP82	Homo sapiens zinc finger protein 82 homolog (mouse) (ZFP82), mRNA.	1	2.5208	0.214522	0.0382842	3.02992
17911	CAACCAACCAGTACTGGT	TCTACTCTACGACGAATATAT	RFX3	Homo sapiens regulatory factor X, 3 (influences HLA class II expression) (RFX3), transcript variant 2, mRNA.	1	2.51528	0.239621	0.0468106	3.01846
19597	CACAGTTGACCATGACAC	CCTGAGAACAATGGTCAGATA	SEMA6A	Homo sapiens sema domain, transmembrane domain (TM), and cytoplasmic domain, (semaphorin) 6A (SEMA6A), mRNA.	1	2.50655	0.18278	0.0283434	3.00028
25669	TGTGACCAACCAACACCA	GCATCATATACGTGATGAAAT	ZNF114	Homo sapiens zinc finger protein 114 (ZNF114), mRNA.	1	2.50462	0.20467	0.0350851	2.99627
16130	GTACTGGTTGTGGTACCA	CCAAGGAAAGTCTGAAAGAAT	PDCL3	Homo sapiens phosducin-like 3 (PDCL3), mRNA.	1	2.48667	0.0447638	0.00241858	2.95892
10002	ACCACAGTTGACGTACAC	GCAATGTTTACCGAATGCTTT	IK	Homo sapiens IK cytokine, down-regulator of HLA II (IK), mRNA.	1	2.48405	0.0164444	0.000247712	2.95347
24578	ACTGCAGTACACGTACTG	GCTGTTTAAGAAGAACCTATT	VPS11	Homo sapiens vacuolar protein sorting 11 homolog (S. cerevisiae) (VPS11), mRNA.	1	2.4735	0.139711	0.0175091	2.93154
948	CATGTGGTACTGTGACCA	GCCTAGTAATAAACGGGTCAA	ARHGEF3	Homo sapiens Rho guanine nucleotide exchange factor (GEF) 3 (ARHGEF3), mRNA.	1	2.47212	0.118273	0.0126687	2.92865
15044	GTTGACGTGTGTCAACCA	GAAGTCATGTATCCACATTTA	NUF2	Homo sapiens NUF2, NDC80 kinetochore complex component, homolog (S. cerevisiae) (NUF2), transcript variant 2, mRNA.	4	2.46889	0.144634	0.0193561	2.92194
31	TGCAGTCAGTACTGTGTG	GAGACCACAAAGCGAAAGTAT	AAMP	Homo sapiens angio-associated, migratory cell protein (AAMP), mRNA.	1	2.46284	0.0934203	0.00809494	2.90936
3550	CAGTTGCACACAGTACAC	CGAGTACCTGAAGTCAACCTT	CASZ1	Homo sapiens castor zinc finger 1 (CASZ1), transcript variant 1, mRNA.	1	2.45867	0.134168	0.0169599	2.90068
10861	CAGTGTTGACACTGTGCA	TCGGCAGAAGATACGCTTAAA	KIAA1009	Homo sapiens KIAA1009 (KIAA1009), mRNA.	1	2.45426	0.0148122	0.000270806	2.89151
18061	GTTGACGTACACGTACCA	AGTACAGCATTCTGCCCTATT	RHEBL1	Homo sapiens Ras homolog enriched in brain like 1 (RHEBL1), mRNA.	1	2.45299	0.164591	0.024822	2.88887
8599	CAGTTGCAGTACCATGAC	GTGGAATGGTTACAGAATTCA	GOLGA3	Homo sapiens golgi autoantigen, golgin subfamily a, 3 (GOLGA3), mRNA.	1	2.44887	0.232042	0.0476731	2.88028
1839	TGACCATGTGGTCAACTG	GCAGTCTTTGTCGTTGTTCAT	BTBD3	Homo sapiens BTB (POZ) domain containing 3 (BTBD3), transcript variant 2, mRNA.	1	2.43994	0.0151865	0.000897819	2.86171
1851	CAACCAGTTGTGGTACAC	GCTGGAGTAATGGGTAACATA	BTF3L4	Homo sapiens basic transcription factor 3-like 4 (BTF3L4), mRNA.	1	2.43908	0.0249802	0.000715468	2.85992
306	ACGTGTTGTGTGTGTGCA	CAGGACCCTTCATCCTGAACT	ADAT1	Homo sapiens adenosine deaminase, tRNA-specific 1 (ADAT1), mRNA.	1	2.43701	0.13037	0.0161769	2.8556
23385	CAACTGGTGTACTGTGCA	GTTTGTCATGGTGGTAGATTC	TRAPPC2L	Homo sapiens trafficking protein particle complex 2-like (TRAPPC2L), mRNA.	1	2.43	0.177155	0.029957	2.84103
483	CACAACGTACTGACTGGT	GCAAAGGTTCTTCCACCGTAT	AMAC1L2	Homo sapiens acyl-malonyl condensing enzyme 1-like 2 (AMAC1L2), mRNA.	1	2.42861	0.123427	0.014641	2.83813
16349	ACGTTGGTGTACGTACCA	TGTGTGATTTGTGACTCCTAT	PHF5A	Homo sapiens PHD finger protein 5A (PHF5A), mRNA.	1	2.41352	0.154191	0.0229893	2.80674
16861	TGACTGTGCAACTGTGCA	GAAGTCCACCCTCCCGTTCAT	PPDPF	Homo sapiens pancreatic progenitor cell differentiation and proliferation factor homolog (zebrafish) (PPDPF), mRNA.	1	2.41236	0.027869	0.000792673	2.80434
20115	GTACCAACCAACACACGT	CCAAACAATCTGTGACTATTA	SKP1A	Homo sapiens S-phase kinase-associated protein 1A (p19A) (SKP1A), transcript variant 1, mRNA.	1	2.41046	0.194944	0.0362342	2.80037
20779	TGCAACCATGACGTACTG	AGTGGACAACAGAACAATATT	SNRPG	Homo sapiens small nuclear ribonucleoprotein polypeptide G (SNRPG), mRNA.	1	2.40857	0.0578923	0.00339082	2.79644
23087	TGACGTTGGTCAGTTGTG	CTCCATGACTGGCCTATTTAC	TMEM79	Homo sapiens transmembrane protein 79 (TMEM79), mRNA.	1	2.4014	0.133935	0.0177827	2.78152
7040	CAGTACTGCATGCAACCA	GCTGTGGTTTACTCCTGTCTA	FAM119B	Homo sapiens family with sequence similarity 119, member B (FAM119B), transcript variant 1, mRNA.	1	2.39862	0.00286296	0.000388702	2.77574
20398	TGACCAGTGTACTGACTG	GCTGCACTTCAACCAGTGTTT	SLC39A8	Homo sapiens solute carrier family 39 (zinc transporter), member 8 (SLC39A8), transcript variant 1, mRNA.	1	2.39766	0.0718077	0.00526039	2.77375
20733	GTTGTGACCATGTGACTG	GCAGATGAAGTATTGGAGATT	SNRNP200	Homo sapiens small nuclear ribonucleoprotein 200kDa (U5) (SNRNP200), mRNA.	1	2.38503	0.2178	0.046111	2.74747
15722	GTGTGTCAGTCAGTACTG	GATTGTAAGAACGACGTCCAT	PACS2	Homo sapiens phosphofurin acidic cluster sorting protein 2 (PACS2), mRNA.	1	2.37486	0.209464	0.0434429	2.72631
9744	CATGACACACTGTGTGGT	CCGCAGCTACCCGGACTACAT	HOXC9	Homo sapiens homeobox C9 (HOXC9), mRNA.	1	2.37105	0.0836994	0.00753197	2.71839
10899	CACAACTGACTGCAACGT	GCAGTGAACAGGCATTTGATT	KIAA1267	Homo sapiens KIAA1267 (KIAA1267), mRNA.	1	2.36391	0.0262196	0.000744737	2.70353
6063	CATGTGGTACCAACACGT	AGGAGGATGAATCTGAGGACA	DRAP1	Homo sapiens DR1-associated protein 1 (negative cofactor 2 alpha) (DRAP1), mRNA.	1	2.36132	0.151226	0.0244157	2.69815
20993	CACAGTGTACCAACTGGT	CTGGTCCGGTCATCAACAAAG	SPACA4	Homo sapiens sperm acrosome associated 4 (SPACA4), mRNA.	1	2.36068	0.123076	0.0170032	2.69681
27027	GTACGTTGCAACGTTGCA	CCTCCCAAAGAAATTCCTTCT	ZNF777	Homo sapiens zinc finger protein 777 (ZNF777), mRNA.	1	2.35507	0.00100224	0.000257878	2.68513
12455	CATGGTACACTGACTGTG	GCTTTCACATTGCACCAGATT	LRRC4	Homo sapiens leucine rich repeat containing 4 (LRRC4), mRNA.	1	2.3537	0.0706134	0.00606757	2.68228
13036	CATGTGACACCATGTGCA	CCTCCTGTCAGACACTTCTAG	MED15	Homo sapiens mediator complex subunit 15 (MED15), transcript variant 1, mRNA.	1	2.35213	0.149482	0.0268817	2.67901
20745	ACTGTGTGTGACTGTGGT	GTTTCCCTTTCTATGACAAAC	SNRPA	Homo sapiens small nuclear ribonucleoprotein polypeptide A (SNRPA), mRNA.	1	2.34494	0.0140094	0.000539589	2.66405
11444	TGCAACACGTACTGACGT	CGGCAGAACAATGAATACCAA	KRT23	Homo sapiens keratin 23 (histone deacetylase inducible) (KRT23), mRNA.	1	2.33706	0.103905	0.0120082	2.64767
12840	GTACACTGCAACACACAC	CCAGAAGGCTTACGAGTATTT	MAGOH	Homo sapiens mago-nashi homolog, proliferation-associated (Drosophila) (MAGOH), mRNA.	1	2.33371	0.191963	0.0392135	2.64069
10780	ACGTACGTGTGTGTACGT	GCTGAGATGGTAGCATAGAAA	KIAA0319L	Homo sapiens KIAA0319-like (KIAA0319L), transcript variant 2, mRNA.	1	2.33031	0.0517929	0.00301826	2.63363
18505	TGGTTGGTACTGCAACTG	CGCTGCCATAGCCAGTAACAT	ROBLD3	Homo sapiens roadblock domain containing 3 (ROBLD3), mRNA.	1	2.32801	0.107402	0.0128822	2.62885
16417	GTACTGGTTGTGTGACAC	GTCAGACACATTCTATGTGAA	PIN4	Homo sapiens protein (peptidylprolyl cis/trans isomerase) NIMA-interacting, 4 (parvulin) (PIN4), mRNA.	1	2.32403	0.00687703	5.81167e-05	2.62056
23913	GTGTCATGCAGTACTGAC	GAGCCCTATTCCAGTACAAAC	UBASH3A	Homo sapiens ubiquitin associated and SH3 domain containing, A (UBASH3A), transcript variant 1, mRNA.	1	2.32316	0.139041	0.0214426	2.61874
24111	GTACGTACGTGTACTGTG	CCACTACCTCTACTACCACTA	UFSP1	Homo sapiens UFM1-specific peptidase 1 (non-functional) (UFSP1), mRNA.	1	2.31661	0.140603	0.0221484	2.60511
15661	CAGTTGACCACAACACAC	CCTTCCGTTTACCTGCTCTAT	OTUB2	Homo sapiens OTU domain, ubiquitin aldehyde binding 2 (OTUB2), mRNA.	1	2.31368	0.142966	0.023435	2.59902
4341	TGACGTACGTCATGTGCA	GCAGTGGGAAATATGCCCTAT	CHCHD7	Homo sapiens coiled-coil-helix-coiled-coil-helix domain containing 7 (CHCHD7), transcript variant 5, mRNA.	1	2.31323	0.20264	0.0447597	2.5981
16279	GTCAACGTTGTGTGACAC	CGCTGGGATAAGAATCCCAAA	PGM2L1	Homo sapiens phosphoglucomutase 2-like 1 (PGM2L1), mRNA.	1	2.31312	0.0674215	0.00533298	2.59786
2653	CATGACCAACTGGTTGCA	GCTTTGGGCACAAGGACCTTT	C1ORF95	Homo sapiens chromosome 1 open reading frame 95 (C1orf95), mRNA.	1	2.30947	0.0183667	0.000702798	2.59026
2054	TGACGTGTACACTGTGGT	CAAGGTCATGGGCTCGCTTAT	C11ORF9	Homo sapiens chromosome 11 open reading frame 9 (C11orf9), transcript variant 1, mRNA.	1	2.30381	0.0453813	0.00258553	2.57849
25154	TGTGCACAGTCAACTGGT	CACCAGAGACCAGGGTATTTA	YTHDC1	Homo sapiens YTH domain containing 1 (YTHDC1), transcript variant 1, mRNA.	1	2.30024	0.180726	0.0367544	2.57107
23343	GTCACAACCAACTGTGCA	CTCTGCAACAAGGACCCATTT	TPST2	Homo sapiens tyrosylprotein sulfotransferase 2 (TPST2), transcript variant 1, mRNA.	1	2.29686	0.00921265	0.000343222	2.56402
1732	ACACGTACCAACGTACGT	CGCCACAAGATGCACGTACCT	BOP1	Homo sapiens block of proliferation 1 (BOP1), mRNA.	1	2.29585	0.0829632	0.00812503	2.56192
18978	CACAACACACACTGACAC	GCCAGAAGTAAGCCTCACATA	RSPRY1	Homo sapiens ring finger and SPRY domain containing 1 (RSPRY1), mRNA.	1	2.29193	0.0163277	0.000325344	2.55378
13077	CAGTCACACAGTACACCA	GCCTGCTTATTACCAGCCTAT	MED23	Homo sapiens mediator complex subunit 23 (MED23), transcript variant 2, mRNA.	1	2.28904	0.205558	0.0472815	2.54776
10356	ACCATGACGTACACTGAC	CCCGGAAATGCAAATGAGACT	ISOC2	Homo sapiens isochorismatase domain containing 2 (ISOC2), mRNA.	1	2.28489	0.198367	0.044816	2.53912
6819	TGTGTGACTGTGGTTGAC	CTGCTCAGAGCCTATGTGCAT	EVI2B	Homo sapiens ecotropic viral integration site 2B (EVI2B), mRNA.	1	2.28376	0.0874268	0.00976114	2.53677
6790	CAGTGTCACATGCAACAC	CCCTCTGATGTTGATTTGAAT	ESF1	Homo sapiens ESF1, nucleolar pre-rRNA processing protein, homolog (S. cerevisiae) (ESF1), mRNA.	1	2.27891	0.190643	0.0421034	2.52668
3388	CAACCAGTTGCAGTTGTG	GCTGCACTTAGTGCATTGGAA	CA5BP	Homo sapiens carbonic anhydrase VB pseudogene (CA5BP), non-coding RNA.	1	2.27491	0.164492	0.0317219	2.51836
21036	GTGTTGTGCAACTGTGCA	CTCCAGAGGAACTGCTGAATG	SPANXC	Homo sapiens SPANX family, member C (SPANXC), mRNA.	1	2.27201	0.0123243	0.000234264	2.51234
7575	TGGTTGTGGTACCATGAC	CCATGGGAGAAGGACCAAGAT	FCAMR	Homo sapiens Fc receptor, IgA, IgM, high affinity (FCAMR), mRNA.	1	2.27186	0.0730888	0.00663998	2.51202
10396	TGTGGTTGTGGTACTGTG	GAGAACGATGAGCCCTTAAAT	IWS1	Homo sapiens IWS1 homolog (S. cerevisiae) (IWS1), mRNA.	1	2.27075	0.0132147	0.000253296	2.50971
713	ACCACATGCACATGACCA	CTCCAAGAAGAGTGTGCTGAA	AP1S1	Homo sapiens adaptor-related protein complex 1, sigma 1 subunit (AP1S1), transcript variant 2, mRNA.	1	2.26775	0.121207	0.0178276	2.50346
14434	CAGTTGACGTACCATGGT	CGAGATCTACGAGTTCCATAA	NCF1C	Homo sapiens neutrophil cytosolic factor 1C pseudogene (NCF1C), non-coding RNA.	1	2.26651	0.151983	0.0278126	2.50088
16633	TGACGTGTGTTGCACACA	CGAGCTGCTTAATGACGAGTT	PLK1	Homo sapiens polo-like kinase 1 (Drosophila) (PLK1), mRNA.	2	2.25872	0.0320646	0.00144201	2.48468
1507	ACACGTCATGACGTACCA	GAAGAAGAACTGCCCGCATAT	BAT1	Homo sapiens HLA-B associated transcript 1 (BAT1), transcript variant 1, mRNA.	1	2.25802	0.123438	0.0187552	2.48324
16834	CACAACACACTGTGTGAC	GCCCAGAAACTTTCGAACAAA	POU3F1	Homo sapiens POU class 3 homeobox 1 (POU3F1), mRNA.	1	2.25519	0.199971	0.0471984	2.47734
26941	GTGTCATGTGCAACACTG	GAAAGGACTATATGTGTCATT	ZNF709	Homo sapiens zinc finger protein 709 (ZNF709), mRNA.	1	2.25162	0.0795998	0.0080866	2.4699
25537	ACACACGTCACATGTGAC	CCTTCCTGGCATCTCAGAAGT	ZFP41	Homo sapiens zinc finger protein 41 homolog (mouse) (ZFP41), mRNA.	1	2.24475	0.00343147	0.000108314	2.45561
15616	ACACACTGCATGTGTGAC	CTCGGGATACACACACACACA	OSBPL9	Homo sapiens oxysterol binding protein-like 9 (OSBPL9), transcript variant 7, mRNA.	1	2.24097	0.18196	0.040545	2.44776
13985	ACACTGGTCAACGTACAC	CCGTAATGTTTGACACACTTA	MTMR12	Homo sapiens myotubularin related protein 12 (MTMR12), mRNA.	1	2.24092	0.154898	0.0302803	2.44765
15834	TGTGCAACTGGTGTTGCA	GAGGGTTGGCTTAATGATGAG	PAR5	Homo sapiens Prader-Willi/Angelman syndrome-5 (PAR5), non-coding RNA.	1	2.23896	0.161474	0.0393345	2.44357
13219	CACAACTGGTTGGTTGTG	CAGGCCTATTTCCATAGATAG	MFAP3L	Homo sapiens microfibrillar-associated protein 3-like (MFAP3L), transcript variant 1, mRNA.	1	2.23657	0.0255736	0.000857685	2.43861
19496	CAACGTTGGTCAACTGAC	CCGATCCTGTCGAACGTATAT	SEC24B	PREDICTED: Homo sapiens SEC24 related gene family, member B (S. cerevisiae), transcript variant 2 (SEC24B), mRNA.	1	2.2293	0.099224	0.0127809	2.42347
15070	ACCAACTGCAGTTGACTG	GCGTACCTTGAGCAGAGTTAT	NUP93	Homo sapiens nucleoporin 93kDa (NUP93), mRNA.	2	2.22882	0.127912	0.0214533	2.42247
12684	GTGTACGTCAGTCAACCA	GTGGAAAGCAAGTTCAACATA	LYZL6	Homo sapiens lysozyme-like 6 (LYZL6), mRNA.	1	2.22826	0.0592837	0.00468219	2.42131
25868	CACATGTGGTCAACACTG	GCCCAAGGACAAAGGATCATT	ZNF232	Homo sapiens zinc finger protein 232 (ZNF232), mRNA.	1	2.22416	0.175192	0.0394177	2.41278
16840	TGGTGTCAGTACACACGT	CGCGCAGGAGATCACCAACCT	POU3F3	Homo sapiens POU class 3 homeobox 3 (POU3F3), mRNA.	1	2.22147	0.0678769	0.00615014	2.40718
24649	CATGTGTGACACTGACAC	GCACACATTATGGCAAGGTTT	VPS41	Homo sapiens vacuolar protein sorting 41 (yeast) (VPS41), transcript variant 1, mRNA.	2	2.22115	0.0289253	0.00188553	2.40651
6706	TGACTGTGCACAGTACGT	CGGAGAAATGAGATACAAAGA	EPSTI1	Homo sapiens epithelial stromal interaction 1 (breast) (EPSTI1), transcript variant 2, mRNA.	1	2.21623	1.34522e-05	3.34048e-05	2.39628
12704	CAGTTGGTGTCATGACTG	GCTCAATAAGTACTACACTGA	MAB21L2	Homo sapiens mab-21-like 2 (C. elegans) (MAB21L2), mRNA.	1	2.21523	0.0787278	0.00881997	2.39421
7085	CACATGCAACTGTGACGT	GCAGCTTCTATGCCTGAATTA	FAM13B	Homo sapiens family with sequence similarity 13, member B (FAM13B), transcript variant 2, mRNA.	1	2.21208	0.122896	0.020215	2.38764
14237	GTCAGTTGTGACTGACCA	ACTCACCTGTATAGGGACTTT	NAGK	Homo sapiens N-acetylglucosamine kinase (NAGK), mRNA.	1	2.21108	0.101373	0.0137329	2.38557
749	CAACACGTCACATGACCA	GCTACCCTCTACTTTGTATTT	AP3S2	Homo sapiens adaptor-related protein complex 3, sigma 2 subunit (AP3S2), mRNA.	1	2.20977	0.0182774	0.000559708	2.38283
14463	TGCATGACTGCAGTACTG	GCTCTTCTGGAACATGTACAA	NDRG4	Homo sapiens NDRG family member 4 (NDRG4), mRNA.	1	2.20671	0.0713365	0.00693528	2.37648
15443	ACACTGTGCATGGTTGGT	CCTCCCATCACATGATGCTCA	OR52J3	Homo sapiens olfactory receptor, family 52, subfamily J, member 3 (OR52J3), mRNA.	1	2.20668	0.021516	0.000966777	2.37642
19926	TGCATGCACAACACTGGT	CTTACCCATTAGTCTCAGAAA	SH3BGRL3	Homo sapiens SH3 domain binding glutamic acid-rich protein like 3 (SH3BGRL3), mRNA.	1	2.20318	0.00674271	0.000219474	2.36912
24752	TGCACACATGACGTACGT	GCTTCCATTGTCAGGGTATTT	WBP11	Homo sapiens WW domain binding protein 11 (WBP11), mRNA.	2	2.2021	0.030123	0.0012778	2.36688
18057	CAGTACTGTGTGTGACAC	AGGCATGAAGTGCCAGTTCAA	RHBDL3	Homo sapiens rhomboid, veinlet-like 3 (Drosophila) (RHBDL3), mRNA.	1	2.19894	0.140242	0.0264306	2.36031
6648	ACGTCAGTGTGTGTACCA	GTGCCACAATAGAGTGATATT	ENOSF1	Homo sapiens enolase superfamily member 1 (ENOSF1), mRNA.	1	2.19675	0.149995	0.0306168	2.35575
11008	GTTGTGTGGTACTGTGCA	ATGGGATGTTCATGAGTATTT	KIAA1841	Homo sapiens KIAA1841 (KIAA1841), mRNA.	1	2.18888	0.0513606	0.0042992	2.33937
12696	ACGTGTCAGTTGACACGT	GCAGCTTATCGAAACATGAAA	LZTFL1	Homo sapiens leucine zipper transcription factor-like 1 (LZTFL1), mRNA.	1	2.1851	0.162358	0.0375507	2.33151
6586	ACCATGCACAACCAACCA	GAGGCTATTATGATCCAGAGA	EMILIN1	Homo sapiens elastin microfibril interfacer 1 (EMILIN1), mRNA.	1	2.18332	0.113229	0.0182548	2.32781
4749	GTTGTGGTTGTGCAACCA	CCATCAAACTCTGAGGCACAT	COBLL1	Homo sapiens COBL-like 1 (COBLL1), mRNA.	1	2.18249	0.0634826	0.00630244	2.32609
26625	ACTGCACAACACCATGAC	GTGAGCCTGTGCAAGTGACAT	ZNF580	Homo sapiens zinc finger protein 580 (ZNF580), transcript variant 2, mRNA.	1	2.17583	0.0675198	0.00657293	2.31223
24651	CACATGCAGTACTGTGCA	CTGATTGCTTGGGCCAATAAT	VPS41	Homo sapiens vacuolar protein sorting 41 (yeast) (VPS41), transcript variant 1, mRNA.	2	2.17536	0.0527282	0.00402114	2.31125
21453	CAGTGTTGGTGTCAACCA	GCTATTTACATCCTGGACTAT	STIM2	Homo sapiens stromal interaction molecule 2 (STIM2), mRNA.	1	2.17229	0.106778	0.0162581	2.30488
5387	ACGTCAGTGTACACACCA	CAGGCAGAAGAGCACAGATGT	DCPS	Homo sapiens decapping enzyme, scavenger (DCPS), mRNA.	1	2.16837	0.106533	0.0169744	2.29672
23842	TGCAACGTACTGCAACCA	GAATCACTGAGCTGTAACAAA	TWSG1	Homo sapiens twisted gastrulation homolog 1 (Drosophila) (TWSG1), mRNA.	1	2.1656	0.147902	0.030728	2.29094
6439	ACACACACTGCATGACCA	GCAGTACTATTCCACTCAGAT	EIF4A3	Homo sapiens eukaryotic translation initiation factor 4A, isoform 3 (EIF4A3), mRNA.	2	2.16367	0.0162525	0.000474756	2.28693
9649	CACATGGTACACACACTG	ACAAGCATAGTCTGAGCGGAA	HNRPM	Homo sapiens heterogeneous nuclear ribonucleoprotein M (HNRPM), transcript variant 1, mRNA.	1	2.16349	0.180749	0.045257	2.28657
16940	ACACGTCAACCAACTGGT	TCCTCACTTCGTTAGGTTATG	PQLC3	Homo sapiens PQ loop repeat containing 3 (PQLC3), mRNA.	1	2.1596	0.124801	0.0224003	2.27846
19259	CAACTGTGGTCATGACTG	CCAGTCTATTTATGACAAGAA	SCARA3	Homo sapiens scavenger receptor class A, member 3 (SCARA3), transcript variant 2, mRNA.	1	2.15917	0.0823805	0.011608	2.27756
19030	TGTGTGCATGCATGTGTG	GAGGCAGCAAGAGTCACTTTG	RTN4RL1	Homo sapiens reticulon 4 receptor-like 1 (RTN4RL1), mRNA.	1	2.15809	0.136027	0.0265691	2.27533
3299	CAACTGTGTGACGTACCA	GCTGGTATTACTATGTAACTA	C9ORF3	Homo sapiens chromosome 9 open reading frame 3 (C9orf3), mRNA.	1	2.1567	0.0110363	0.000496522	2.27243
9334	GTACACACACTGGTACGT	GCTCGAAGAAAGCCGTGACTA	HIST1H2BK	Homo sapiens histone cluster 1, H2bk (HIST1H2BK), mRNA.	1	2.15617	0.0475364	0.00378211	2.27132
17749	ACACCACAGTTGCACAGT	TGGGATATTGTGGTTGATAAC	RBX1	Homo sapiens ring-box 1 (RBX1), mRNA.	1	2.15155	0.071951	0.00778023	2.26173
5527	CATGACACACGTTGACAC	AGAAGAACTATCGGGCAGATA	DEF6	Homo sapiens differentially expressed in FDCP 6 homolog (mouse) (DEF6), mRNA.	1	2.15118	0.12452	0.0226577	2.26095
21936	GTGTTGACGTTGACACAC	CTACCCTGTATATCAAGAATT	TAS2R41	Homo sapiens taste receptor, type 2, member 41 (TAS2R41), mRNA.	1	2.15017	0.158643	0.0361894	2.25885
1385	ACTGACCACATGTGTGAC	GAGTGGAGGGAAGAGTGATCT	ATXN2L	Homo sapiens ataxin 2-like (ATXN2L), transcript variant A, mRNA.	1	2.14967	0.0374775	0.00215416	2.2578
20520	TGCATGCACAACGTTGAC	CCTGGGATTGACTGAGATGCT	SLN	Homo sapiens sarcolipin (SLN), mRNA.	1	2.14873	0.13904	0.0282383	2.25585
24754	CACACACATGACGTACCA	GCCACCCTCTATCCTAAAGAA	WBP11	Homo sapiens WW domain binding protein 11 (WBP11), mRNA.	2	2.14686	0.103642	0.0162127	2.25195
5781	CAGTCAGTGTGTACACCA	CCACTGTCATTAGTTTACAAA	DMTF1	Homo sapiens cyclin D binding myb-like transcription factor 1 (DMTF1), mRNA.	1	2.14581	0.106051	0.0174753	2.24978
18723	TGCATGCAGTTGACTGAC	GAGACCCACCTTGCTCATAAA	RPL41	Homo sapiens ribosomal protein L41 (RPL41), transcript variant 2, mRNA.	1	2.14457	0.00595967	6.14625e-05	2.2472
17925	GTCACACAACTGTGACTG	CTGGGCAACACGCATTAACAA	RGL4	Homo sapiens ral guanine nucleotide dissociation stimulator-like 4 (RGL4), mRNA.	1	2.14388	0.142929	0.0308871	2.24575
23388	GTGTGTCAGTGTTGACTG	GCATCACTCCAAGCATTACTA	TRAPPC3	Homo sapiens trafficking protein particle complex 3 (TRAPPC3), mRNA.	1	2.14305	0.119805	0.0214245	2.24404
7500	CAGTCAACCATGTGTGGT	GCTGGGAATATGGCATTTGGA	FBXO32	Homo sapiens F-box protein 32 (FBXO32), transcript variant 2, mRNA.	1	2.1423	0.0114867	0.000938566	2.24247
18600	ACTGGTACTGGTGTACAC	GTGCATCTCTTGCTGATATAA	RPL24	Homo sapiens ribosomal protein L24 (RPL24), mRNA.	1	2.14094	0.110261	0.0181718	2.23965
24369	TGTGCAGTTGACACACTG	CTCAGTCAGGTCACATGTATA	USP49	Homo sapiens ubiquitin specific peptidase 49 (USP49), mRNA.	1	2.14	0.0302139	0.00179026	2.23769
1092	CAACACGTGTCAGTACCA	CTGAACAGCATCCCAGACATT	ARRDC1	Homo sapiens arrestin domain containing 1 (ARRDC1), mRNA.	1	2.13936	0.110922	0.0186081	2.23636
10916	CAACCATGTGGTACTGAC	CTAAAGTGTTTAGGAGTTCAT	KIAA1370	Homo sapiens KIAA1370 (KIAA1370), mRNA.	1	2.13864	0.128627	0.0247655	2.23486
14927	TGCACATGTGGTGTACTG	GCCAGTTCAGTCCAGTATGAT	NRG4	Homo sapiens neuregulin 4 (NRG4), mRNA.	1	2.13828	0.0743692	0.00843351	2.2341
13030	CATGCAACTGACTGTGCA	GTGTCCGTTTGCCAGTAATAA	MED14	Homo sapiens mediator complex subunit 14 (MED14), mRNA. XM_942921	1	2.13676	0.146928	0.0319339	2.23095
4043	CACAACCACAGTGTACTG	CGAGAAACAGAAACGTAAGAA	CDCA5	Homo sapiens cell division cycle associated 5 (CDCA5), mRNA.	1	2.13511	0.149908	0.0331749	2.22752
26915	TGACGTGTTGGTCAACAC	GAGTGACCAGAACATTGAATA	ZNF700	Homo sapiens zinc finger protein 700 (ZNF700), mRNA.	1	2.13468	0.185439	0.0494931	2.22663
1349	TGGTGTACCAACTGTGTG	CAGAGAAACATTCACACACAA	ATP6V0E2	Homo sapiens ATPase, H+ transporting V0 subunit e2 (ATP6V0E2), transcript variant 1, mRNA.	1	2.12988	0.10672	0.0179375	2.21664
18089	GTGTTGACACCAACACCA	CCTGAGTGTATACCAGGTAAA	RHOXF1	Homo sapiens Rhox homeobox family, member 1 (RHOXF1), mRNA.	1	2.1285	0.0300889	0.00142365	2.21377
13370	CATGCAGTCATGACACAC	GCCTACAAGGAGTCCTACAAA	MLX	Homo sapiens MAX-like protein X (MLX), transcript variant 1, mRNA.	1	2.12513	0.0599694	0.00573645	2.20676
21544	GTACGTACGTACACTGCA	CCTGTGAAGTTATTATTGGTT	STXBP3	Homo sapiens syntaxin binding protein 3 (STXBP3), mRNA.	1	2.1248	0.106868	0.0181213	2.20606
25620	GTACGTACGTGTACACGT	GCCTGACATCAAGCCAAATAT	ZMIZ1	Homo sapiens zinc finger, MIZ-type containing 1 (ZMIZ1), mRNA.	1	2.1248	0.030149	0.00148551	2.20606
25961	CATGCATGGTTGTGTGTG	GACCCTGCAATATAACATGCA	ZNF274	Homo sapiens zinc finger protein 274 (ZNF274), transcript variant ZNF274c, mRNA.	1	2.12455	0.118745	0.0218169	2.20555
26014	GTGTACCAGTGTACTGCA	CAGCGAGAGGTAGAGGTTATT	ZNF292	Homo sapiens zinc finger protein 292 (ZNF292), mRNA.	2	2.12367	0.150284	0.0343778	2.20372
199	GTTGTGGTACACACTGCA	CCATGGAACGAGGATGCAAAT	ACRV1	Homo sapiens acrosomal vesicle protein 1 (ACRV1), transcript variant 11, mRNA.	1	2.1169	0.0520698	0.00442561	2.18964
5119	TGTGGTCACAACGTTGTG	CTGAAGTCTCCTGGCATATGT	CT45-2	Homo sapiens cancer/testis antigen CT45-2 (CT45-2), mRNA.	1	2.11684	0.169231	0.0430527	2.1895
20374	GTCACAGTTGCAGTTGTG	GCATGAGCTCCTGGAAAGAGT	SLC38A2	Homo sapiens solute carrier family 38, member 2 (SLC38A2), mRNA.	1	2.11404	0.127574	0.0252664	2.18367
23704	ACGTACACCAACCAACTG	CGATGACTTTGGGAAATTGCT	TTC7A	Homo sapiens tetratricopeptide repeat domain 7A (TTC7A), mRNA.	1	2.11379	0.111634	0.0195104	2.18315
20247	ACTGGTTGCAACTGACCA	CCTTCGCATCTCAGAATAATT	SLC26A11	PREDICTED: Homo sapiens solute carrier family 26, member 11 (SLC26A11), mRNA.	1	2.11093	0.022457	0.000817945	2.17722
20617	CACAACGTGTACGTACCA	TCCTGGTATGACCATAGATTT	SMU1	Homo sapiens smu-1 suppressor of mec-8 and unc-52 homolog (C. elegans) (SMU1), mRNA.	1	2.10915	0.109463	0.0189646	2.1735
16746	TGTGGTTGCATGTGACTG	GCTGGTGAGAAGTATAAATAT	POLA1	Homo sapiens polymerase (DNA directed), alpha 1, catalytic subunit (POLA1), mRNA.	1	2.10902	0.0749838	0.0090206	2.17324
12108	CAACACGTACACGTTGAC	CCATCCAGCTTGCCATGTTCT	LOC346887	PREDICTED: Homo sapiens similar to solute carrier family 16 (monocarboxylic acid transporters), member 14 (LOC346887), mRNA.	1	2.107	0.062973	0.00664528	2.16904
3755	TGGTGTACTGCAGTACCA	GCACATCACAACCTGTCACAT	CCDC77	Homo sapiens coiled-coil domain containing 77 (CCDC77), mRNA.	1	2.10265	0.0926247	0.0229532	2.15999
13614	GTCAACGTGTCAGTACCA	GAGCATCAGAATGGCAAGGTT	MRPL18	Homo sapiens mitochondrial ribosomal protein L18 (MRPL18), nuclear gene encoding mitochondrial protein, mRNA.	1	2.10123	0.000595156	9.31076e-05	2.15703
23255	GTTGTGCAGTACACTGCA	GCAGTACACAGAAGCAGTGAA	TOMM34	Homo sapiens translocase of outer mitochondrial membrane 34 (TOMM34), nuclear gene encoding mitochondrial protein, mRNA.	1	2.10101	0.0145875	0.00054123	2.15658
11385	CATGGTCATGTGACTGAC	GTTCAGAGTTACATCATTCAA	KLHL6	Homo sapiens kelch-like 6 (Drosophila) (KLHL6), mRNA.	1	2.09479	0.021474	0.000860547	2.14364
20902	TGTGTGCACAACGTACCA	CGCTCTATGATGTCAGCTTAT	SON	Homo sapiens SON DNA binding protein (SON), transcript variant e, mRNA.	4	2.09477	0.0189611	0.000599493	2.14359
1474	TGACGTGTGTACCAACAC	GACGATGTATCCCTGGTAGAA	BAIAP3	Homo sapiens BAI1-associated protein 3 (BAIAP3), mRNA.	1	2.08972	0.0622216	0.00645752	2.13308
26511	TGGTTGTGCAGTACACTG	GCGTTCTACCAGAACAGACAT	ZNF554	Homo sapiens zinc finger protein 554 (ZNF554), mRNA.	1	2.08896	0.071142	0.00967561	2.1315
18468	GTTGACACGTACACACCA	CGGCAAGAGTGTCCAGTATGT	RNF5	Homo sapiens ring finger protein 5 (RNF5), mRNA.	1	2.08774	0.128633	0.0272904	2.12897
2727	CAGTACTGCACACAACTG	CGAGGCATTTGAGCATTGGAA	C20ORF4	Homo sapiens chromosome 20 open reading frame 4 (C20orf4), mRNA.	1	2.08754	0.102877	0.0175522	2.12854
20673	GTGTCACAACACGTTGTG	CAGGACAAGCACTTTCTCAGA	SNAPC4	Homo sapiens small nuclear RNA activating complex, polypeptide 4, 190kDa (SNAPC4), mRNA.	1	2.08659	0.123891	0.0250763	2.12658
12488	TGTGACTGCACAACTGTG	ACTGTGCCTGCTGGAACAATT	LRRC56	Homo sapiens leucine rich repeat containing 56 (LRRC56), mRNA.	1	2.07919	0.0162756	0.000556495	2.11117
596	ACTGCAGTTGCAACTGGT	GGGCCGAGTGAAGCATTTAAT	ANKRD39	Homo sapiens ankyrin repeat domain 39 (ANKRD39), mRNA.	1	2.07902	0.0297527	0.00163339	2.11082
18848	GTGTTGTGTGGTGTACAC	GCCATTAAGAAATTCGTCATT	RPS26	Homo sapiens ribosomal protein S26 (RPS26), mRNA.	1	2.07548	0.0654752	0.00742402	2.10346
27250	CACAGTACGTCAACACTG	CAATTCAGAAAGACGGGACAT	ZSCAN16	Homo sapiens zinc finger and SCAN domain containing 16 (ZSCAN16), mRNA.	1	2.07518	0.126118	0.0267306	2.10284
8269	CACAGTTGACTGTGACGT	CAGAGGACATTCCCATAATTT	GEM	Homo sapiens GTP binding protein overexpressed in skeletal muscle (GEM), transcript variant 1, mRNA.	1	2.07376	0.050841	0.0047158	2.09988
5645	CACAACTGACTGTGTGCA	CTGTGTTTAGTCCCGCACTTA	DHPS	Homo sapiens deoxyhypusine synthase (DHPS), transcript variant 1, mRNA.	1	2.06912	0.00947965	0.000347164	2.09022
26367	GTCAACCAACTGGTACCA	CCCACGTACTTACGGAGTCAT	ZNF490	Homo sapiens zinc finger protein 490 (ZNF490), mRNA.	1	2.06431	0.00927643	0.000159137	2.08022
20478	ACACCATGGTACTGACGT	GCTGCTTTCTTCACCGCCGTT	SLCO4A1	Homo sapiens solute carrier organic anion transporter family, member 4A1 (SLCO4A1), mRNA.	1	2.06428	0.130912	0.0292363	2.08015
170	TGCAGTGTGTCAACTGAC	TGATGGCTCTGGCTTACTATA	ACOT1	Homo sapiens acyl-CoA thioesterase 1 (ACOT1), mRNA.	1	2.06423	0.022088	0.00184102	2.08006
20551	TGTGTGACACCACAACTG	CCAAGTAGAACAGGAACTTAA	SMC3	Homo sapiens structural maintenance of chromosomes 3 (SMC3), mRNA.	1	2.06283	0.164707	0.04493	2.07714
7657	CAGTCACATGACGTTGTG	CCGACAGCATTATTCTGAGAG	FEZ2	Homo sapiens fasciculation and elongation protein zeta 2 (zygin II) (FEZ2), transcript variant 1, mRNA.	2	2.06213	0.164812	0.045296	2.07567
11265	GTACCACAACCAACTGAC	GAGGTACAACCGGCTATATTT	KLHDC10	Homo sapiens kelch domain containing 10 (KLHDC10), mRNA.	1	2.05809	0.130096	0.0290135	2.06729
6388	ACACACGTGTTGCACAAC	GCGCCTTGAGAGTCTGAATAT	EIF3A	Homo sapiens eukaryotic translation initiation factor 3, subunit A (EIF3A), mRNA.	1	2.05562	0.144192	0.0353639	2.06215
11515	CAACGTACGTTGTGTGGT	CCTCCCTATCTTGGAAACTGA	KRT38	Homo sapiens keratin 38 (KRT38), mRNA.	1	2.05347	0.0676418	0.00817226	2.05766
15318	ACCACATGACCATGTGAC	GAGTTCCTCCTACTGGGATTT	OR2A1	Homo sapiens olfactory receptor, family 2, subfamily A, member 1 (OR2A1), mRNA.	1	2.05298	0.144019	0.0356205	2.05664
16438	ACGTCATGCACAACACCA	GCCTATAAGCTGTGCAAGGTT	PITPNM1	Homo sapiens phosphatidylinositol transfer protein, membrane-associated 1 (PITPNM1), mRNA.	1	2.05033	0.162454	0.0452707	2.05113
4814	CATGCACACACACAACAC	GAATCTGAGTTCATGCTGAAT	COPB1	Homo sapiens coatomer protein complex, subunit beta 1 (COPB1), mRNA.	1	2.04861	0.0418334	0.00356105	2.04756
6944	CAGTTGACTGCACAACAC	CGGAATCTTAGTTCTTCCATT	FAIM2	Homo sapiens Fas apoptotic inhibitory molecule 2 (FAIM2), mRNA.	1	2.0483	0.0775439	0.0109113	2.0469
5954	ACACCAACGTACTGACCA	CCAGCACTACTCCTTCTACAT	DOCK2	Homo sapiens dedicator of cytokinesis 2 (DOCK2), mRNA.	1	2.04785	0.0702414	0.00902945	2.04597
17665	GTCAACTGCAGTACTGAC	GCTTCGAGTGCTAGTTCATTT	RBM39	Homo sapiens RNA binding motif protein 39 (RBM39), transcript variant 2, mRNA.	1	2.04719	0.170554	0.0491729	2.04461
19570	GTGTCAACACCATGACAC	GATGGGACCTACGATGTCATT	SEMA3G	Homo sapiens sema domain, immunoglobulin domain (Ig), short basic domain, secreted, (semaphorin) 3G (SEMA3G), mRNA.	1	2.04505	0.0192856	0.000681115	2.04015
10955	CATGACACCAGTGTACTG	GCTAGTAGACAGAGAACATAA	KIAA1524	Homo sapiens KIAA1524 (KIAA1524), mRNA.	1	2.04411	0.148973	0.0385732	2.03819
8031	GTGTGTTGTGTGACTGCA	GCTGTCAACAGGTGTTCCTTA	FRMD3	Homo sapiens FERM domain containing 3 (FRMD3), mRNA.	1	2.04252	0.00396115	0.000123167	2.03488
8043	CAACACCAACACTGTGGT	TCCGAGATGGACAGCGATAAG	FRMD4B	PREDICTED: Homo sapiens FERM domain containing 4B, transcript variant 2 (FRMD4B), mRNA.	2	2.04233	0.0828468	0.013268	2.03448
8594	TGACACTGTGACCAACGT	GAAGAGACTAGAACAGAACTT	GOLGA1	Homo sapiens golgi autoantigen, golgin subfamily a, 1 (GOLGA1), mRNA.	1	2.04161	0.0067198	0.000206856	2.03299
3085	GTACGTGTTGACTGTGTG	GCGAGAACTCTTCCAGTATAT	C6ORF134	Homo sapiens chromosome 6 open reading frame 134 (C6orf134), transcript variant 1, mRNA.	1	2.04	0.057928	0.00615216	2.02965
15814	ACGTGTACACCATGTGTG	GTCCCATCCAGTGCTTCATAC	PAQR7	Homo sapiens progestin and adipoQ receptor family member VII (PAQR7), mRNA.	1	2.03828	0.155626	0.0421938	2.02606
22111	GTTGTGACACACACTGGT	CCAGGACAACAGCCCTTATAT	TBPL2	Homo sapiens TATA box binding protein like 2 (TBPL2), mRNA.	1	2.03531	0.120508	0.0265049	2.01989
6876	TGTGCACATGCATGTGCA	CGCTTCAGTATGAGATATAGC	EXOC8	Homo sapiens exocyst complex component 8 (EXOC8), mRNA.	1	2.03432	0.0819944	0.012337	2.01782
3245	CAGTACACACACGTTGTG	GCAGTCTCAGCCATACTCTGT	C8ORF55	Homo sapiens chromosome 8 open reading frame 55 (C8orf55), mRNA.	1	2.03202	0.0101483	0.000193485	2.01305
5966	GTTGCATGACCAACTGGT	CAGGCGCCATTGCATGGATCA	DOHH	Homo sapiens deoxyhypusine hydroxylase/monooxygenase (DOHH), mRNA.	1	2.03022	0.102227	0.0191746	2.00929
26599	CACATGACGTTGGTACGT	CACAGCTATGTCCTAATAGAA	ZNF572	Homo sapiens zinc finger protein 572 (ZNF572), mRNA.	1	2.02965	0.0734912	0.0100775	2.00811
10675	ACCAGTTGGTTGACACAC	CCAGACTTACAGGGACACTTA	KDM5A	Homo sapiens lysine (K)-specific demethylase 5A (KDM5A), transcript variant 2, mRNA.	1	2.02927	0.117259	0.024989	2.00732
27280	TGTGGTGTCAGTACTGAC	AGGTTCAAGAACAGGTTAAAC	ZSWIM6	PREDICTED: Homo sapiens zinc finger, SWIM-type containing 6 (ZSWIM6), mRNA.	1	2.02799	0.12994	0.0306016	2.00466
9840	CAACCAGTTGTGACTGTG	CCTATGGTTGTAACTTGGTAT	HSPBAP1	Homo sapiens HSPB (heat shock 27kDa) associated protein 1 (HSPBAP1), mRNA.	1	2.02619	0.133296	0.0322808	2.00092
