# Supplementary material for: The kinesin motor KIF11 coordinates NLR localization and activation in the innate immune response
Source: Research Square preprint supplement (doi:10.21203/rs.3.rs-8293641/v1), 2026-01-06
Supplement: Supplementary file 4 [file 8a03c0f3998453eadc4e9f88.xlsx]

## Sheet: Fig. 1d
siCtrl	siKIF11#1	siKIF11#2
8.42697	38.0282	43.125
7.47126	35.2113	36.5269

## Sheet: Fig. 1f
siCtrl		siKIF11#1
NT	Peudomonas	NT	Peudomonas
37.9204	4692.65	18.9602	2806.11
28.4403	4474.6	94.8009	2720.79

## Sheet: Fig. 1g
siCtrl		siKIF11#1
NT	Peudomonas	NT	Peudomonas
0	24.8834	0	20.5592
0	23.3281	0	18.9145
0	22.8616	0	17.5987

## Sheet: Fig. 1i
	Pseudomonas
NT	Ctrl	monastrol	TR24	VII
0	1800.06	873.074	986.301	385.605
0	1721.8	908.197	935.167	388.425

## Sheet: Fig. 1j
	Pseudomonas
NT	Ctrl	monastrol	TR24	VII
0	13.7368	5.85975	8.30932	4.70701
0	11.8657	5.38642	6.44028	3.39578

## Sheet: Fig. 1k
	Salmonella
NT	Crrl	monastrol	TR24
0	1458.04	586.684	379.011
0	1630.56	689.713	640.768

## Sheet: Fig. 4a
	+MDP
	MDP
no MDP	Ctrl	monastrol	TR24
0.170566	3.71194	2.30926	0.808912
0.206819	3.82536	2.25652	0.799276

## Sheet: Fig. 4b
	+LPS
	LPS
no MDP	Ctrl	monastrol	TR24
0.170566	4.62512	4.11533	3.98529
0.206819	4.58799	4.10975	4.04847

## Sheet: Fig. 4c
	+MDP
no MDP	Ctrl	monastrol	TR24
0.30068	7.94515	2.38536	1.23946
0.277207	7.10603	3.08941	1.52148

## Sheet: Fig. 4d
	+LPS
no MDP	Ctrl	monastrol	TR24
0.30068	3.51127	2.66069	2.68984
0.277207	2.95855	2.76181	2.70484

[truncated: 16 more sheets: Fig. 4e, Fig. 4f, Fig. 4g, Fig. 4h, Fig. 4i, Fig. 4k, Fig. 4l, Fig. 4m, Fig. 6a, Fig. 6b, Fig. 6c, Fig. 6D, Fig. 6e, Fig. 6f, Supple Fig. 1, Supple Fig. 2]
