# Supplementary material for: The kinesin motor KIF11 coordinates NLR localization and activation in the innate immune response
Source: Research Square preprint supplement (doi:10.21203/rs.3.rs-8293641/v1), 2026-01-06
Supplement: Supplementary file 5 [file ac7834474a612d89b4957204.xlsx]

## Sheet: Module2Analyzed
#	Barcode Sequence	mRNA Target Sequence	shRNA Sequence	Cellecta ID	Gene Symbol	Definition	Synonyms	Entrez Gene ID	RefSeq ID	GI	Protein Product	Chromosome	Cytoband	2A	2B	aveAB	sdAB	sd%	2C	2D	aveCD	sdCD	sd%	fcC	fcD	ave-fc	sd-fc	t-test	除外	average	z-Score
300	CATGTGGTTGTGGTTGGT	GCAGGAGGAAGAGAGATTTGG	TAGAAGACGCACCGGGCAGGAGGAGGAGAGGTTTGGGTTAATATTCATAGCCCAAATCTCTCTTCCTCCTGCTTTTTTGGCAAGCAAAAGACGGCATACGAGATCCACCAACCACAACCACATGTTCGCCGTCTTCGT	CLL-H-027774	ADAMTS12	Homo sapiens ADAM metallopeptidase with thrombospondin type 1 motif, 12 (ADAMTS12), mRNA.	PRO4389	81792	NM_030955.2	51558723	NP_112217.2	5	5p13.3a	7.52406	7.54833	7.5362	0.0171612	0.227717	-	0.380198	0.380198	#DIV/0!	#DIV/0!	#VALUE!	0.0504495	#VALUE!	#VALUE!	#DIV/0!	1
1873	GTTGTGGTACCAACTGGT	GTTGCATCAAGAAACTTCAAA	TAGAAGACGCACCGGGTTGCATCAAGAAACTTCAAAGTTAATATTCATAGCTTTGAAGTTTCTTGATGCAACTTTTTTGGCAAGCAAAAGACGGCATACGAGATCCACCAGTTGGTACCACAACTTCGCCGTCTTCGT	CLL-H-029347	BTN2A2	Homo sapiens butyrophilin, subfamily 2, member A2 (BTN2A2), transcript variant 1, mRNA.	BTF2; BT2.2; FLJ41908	10385	NM_006995.3	31881700	NP_008926.2	6	6p22.1d	15.9037	24.815	20.3594	6.30123	30.95	-	11.4915	11.4915	#DIV/0!	#DIV/0!	#VALUE!	0.564432	#VALUE!	#VALUE!	#DIV/0!	1
2051	CAGTGTACACTGTGTGTG	CCATATGCTTCAGGATGGGAT	TAGAAGACGCACCGGCCATATGTTTAAGGATGGGATGTTAATATTCATAGCATCCCATCCTGAAGCATATGGTTTTTTGGCAAGCAAAAGACGGCATACGAGATCCCACACACAGTGTACACTGTTCGCCGTCTTCGT	CLL-H-029525	C14ORF169	Homo sapiens chromosome 14 open reading frame 169 (C14orf169), mRNA.	FLJ21802	79697	NM_024644.2	106879205	NP_078920.2	14	14q24.3a	5.58351	32.9863	19.2849	19.3767	100.476	-	3.97307	3.97307	#DIV/0!	#DIV/0!	#VALUE!	0.206019	#VALUE!	#VALUE!	#DIV/0!	1
2412	TGACGTTGGTACCACAAC	GAGCTCTTCCAAGGAATGGAT	TAGAAGACGCACCGGGAGCTCTTCTAAGGAATGGGTGTTAATATTCATAGCATCCATTCCTTGGAAGAGCTCTTTTTTGGCAAGCAAAAGACGGCATACGAGATCCGTTGTGGTACCAACGTCATTCGCCGTCTTCGT	CLL-H-029886	C6ORF138	Homo sapiens chromosome 6 open reading frame 138 (C6orf138), mRNA.	dJ402H5.2; FLJ41841	442213	NM_001013732.3	148277105	NP_001013754.2	6	6p12.3d	19.1498	4.89032	12.02	10.0829	83.8844	-	3.14614	3.14614	#DIV/0!	#DIV/0!	#VALUE!	0.261741	#VALUE!	#VALUE!	#DIV/0!	1
3251	GTGTGTGTCAGTGTCAAC	CAGGCTGCAATGACAGAATGT	TAGAAGACGCACCGGCAGGCTGTAATGATAGAATGTGTTAATATTCATAGCACATTCTGTCATTGCAGCCTGTTTTTTGGCAAGCAAAAGACGGCATACGAGATCCGTTGACACTGACACACACTTCGCCGTCTTCGT	CLL-H-030725	CEP55	Homo sapiens centrosomal protein 55kDa (CEP55), mRNA.	URCC6; C10orf3; FLJ10540	55165	NM_001127182.1	34147683	NP_060601.2	10	10q23.33b	10.2144	6.81115	8.51276	2.40645	28.2687	-	13.5731	13.5731	#DIV/0!	#DIV/0!	#VALUE!	1.59444	#VALUE!	#VALUE!	#DIV/0!	1
6227	ACGTCACACACAGTTGCA	GCGTAGTGCTTGCCTTTGTTC	TAGAAGACGCACCGGGCGTAGTGCTTGTCTTTGTTTGTTAATATTCATAGCGAACAAAGGCAAGCACTACGCTTTTTTGGCAAGCAAAAGACGGCATACGAGATCCTGCAACTGTGTGTGACGTTTCGCCGTCTTCGT	CLL-H-033701	FAM127C	Homo sapiens family with sequence similarity 127, member C (FAM127C), mRNA.	CXX1c; FLJ25577; MAR8B	441518	NM_001078173.1	118200336	NP_001071641.1	X	Xq26.3a	26.9737	32.6333	29.8035	4.00193	13.4277	20.1147	-	20.1147	#DIV/0!	#DIV/0!	0.674911	#VALUE!	#VALUE!	#VALUE!	#DIV/0!	1
8324	CATGTGACACTGACTGGT	GAAATAGAAGATTCTGGTCCT	TAGAAGACGCACCGGGAAATAGAAGATTCTGGTTCTGTTAATATTCATAGCAGGACCAGAATCTTCTATTTCTTTTTTGGCAAGCAAAAGACGGCATACGAGATCCACCAGTCAGTGTCACATGTTCGCCGTCTTCGT	CLL-H-035798	GTF3C6	Homo sapiens general transcription factor IIIC, polypeptide 6, alpha 35kDa (GTF3C6), mRNA.	C6orf51; TFIIIC35; bA397G5.3	112495	NM_138408.3	50355976	NP_612417.1	6	6q21h	3.71352	16.1349	9.92423	8.78328	88.5033	-	8.60197	8.60197	#DIV/0!	#DIV/0!	#VALUE!	0.866765	#VALUE!	#VALUE!	#DIV/0!	1
10626	ACGTACACGTGTCAACAC	GCCCTGCAATTGTAACTCCAA	TAGAAGACGCACCGGGCCCTGTAATTGTAACTCTAAGTTAATATTCATAGCTTGGAGTTACAATTGCAGGGCTTTTTTGGCAAGCAAAAGACGGCATACGAGATCCGTGTTGACACGTGTACGTTTCGCCGTCTTCGT	CLL-H-038100	LAMC2	Homo sapiens laminin, gamma 2 (LAMC2), transcript variant 2, mRNA.	BM600; EBR2; MGC141938; MGC138491; LAMB2T; LAMNB2; EBR2A; B2T	3918	NM_005562.2	9845499	NP_061486.1	1	1q25.3d	7.12713	13.7157	10.4214	4.65885	44.7045	-	8.29782	8.29782	#DIV/0!	#DIV/0!	#VALUE!	0.796226	#VALUE!	#VALUE!	#DIV/0!	1
10896	GTTGTGTGTGCACAACCA	TGGAAGCATCTTTGCTAAGTT	TAGAAGACGCACCGGTGGAAGCATCTTTGTTAAGTTGTTAATATTCATAGCAACTTAGCAAAGATGCTTCCATTTTTTGGCAAGCAAAAGACGGCATACGAGATCCTGGTTGTGCACACACAACTTCGCCGTCTTCGT	CLL-H-038370	LIN52	Homo sapiens lin-52 homolog (C. elegans) (LIN52), mRNA.	C14orf46; c14_5549	91750	NM_001024674.2	67003577	NP_001019845.1	14	14q24.3a	27.3795	7.24723	17.3134	14.2356	82.2235	8.55329	-	8.55329	#DIV/0!	#DIV/0!	0.494028	#VALUE!	#VALUE!	#VALUE!	#DIV/0!	1
12290	CAACACACACCAGTTGGT	GCTAGGCCAAGATTTCCCAAT	TAGAAGACGCACCGGGCTAGGCTAAGATTTCCTAATGTTAATATTCATAGCATTGGGAAATCTTGGCCTAGCTTTTTTGGCAAGCAAAAGACGGCATACGAGATCCACCAACTGGTGTGTGTTGTTCGCCGTCTTCGT	CLL-H-039764	MMP28	Homo sapiens matrix metallopeptidase 28 (MMP28), transcript variant 1, mRNA.	MMP25; MM28	79148	NM_001032278.1	73808269	NP_077278.1	17	17q12b	11.7756	6.55158	9.16361	3.69397	40.3113	-	6.27326	6.27326	#DIV/0!	#DIV/0!	#VALUE!	0.684584	#VALUE!	#VALUE!	#DIV/0!	1
13682	CAGTCAACTGGTGTTGTG	GCTGGTCATCGCTATCTCCTA	TAGAAGACGCACCGGGCTGGTCATCGTTATCTCTTAGTTAATATTCATAGCTAGGAGATAGCGATGACCAGCTTTTTTGGCAAGCAAAAGACGGCATACGAGATCCCACAACACCAGTTGACTGTTCGCCGTCTTCGT	CLL-H-041156	NPBWR1	Homo sapiens neuropeptides B/W receptor 1 (NPBWR1), mRNA.	GPR7; MGC129755	2831	NM_005285.3	53850800	NP_005276.2	8	8q11.23b	7.57699	11.0993	9.33813	2.49063	26.6716	9.7493	-	9.7493	#DIV/0!	#DIV/0!	1.04403	#VALUE!	#VALUE!	#VALUE!	#DIV/0!	1
14291	GTTGTGGTGTTGGTTGTG	GCTCAGGTACACCAGCATGAT	TAGAAGACGCACCGGGCTCAGGTATACCAGTATGATGTTAATATTCATAGCATCATGCTGGTGTACCTGAGCTTTTTTGGCAAGCAAAAGACGGCATACGAGATCCCACAACCAACACCACAACTTCGCCGTCTTCGT	CLL-H-041765	OR10G4	Homo sapiens olfactory receptor, family 10, subfamily G, member 4 (OR10G4), mRNA.	OR11-278	390264	NM_001004462.1	52317171	NP_001004462.1	11	11q24.1c	0.0352828	2.62686	1.33107	1.83252	137.673	-	0.0285148	0.0285148	#DIV/0!	#DIV/0!	#VALUE!	0.0214225	#VALUE!	#VALUE!	#DIV/0!	1
15325	CATGTGCAACTGGTTGGT	GAGGTGGTGACCTTCATAGTC	TAGAAGACGCACCGGGAGGTGGTGACCTTTATAGTTGTTAATATTCATAGCGACTATGAAGGTCACCACCTCTTTTTTGGCAAGCAAAAGACGGCATACGAGATCCACCAACCAGTTGCACATGTTCGCCGTCTTCGT	CLL-H-042799	OR5A2	Homo sapiens olfactory receptor, family 5, subfamily A, member 2 (OR5A2), mRNA.		219981	NM_001001954.1	50080194	NP_001001954.1	11	11q12.1d	3.65177	9.09538	6.37357	3.84921	60.3933	0.0120809	-	0.0120809	#DIV/0!	#DIV/0!	0.00189547	#VALUE!	#VALUE!	#VALUE!	#DIV/0!	1
15551	TGTGTGACACGTGTTGAC	GTGGCCTTTGTGATTGCTGTT	TAGAAGACGCACCGGGTGGTCTTTGTGATTGTTGTTGTTAATATTCATAGCAACAGCAATCACAAAGGCCACTTTTTTGGCAAGCAAAAGACGGCATACGAGATCCGTCAACACGTGTCACACATTCGCCGTCTTCGT	CLL-H-043025	OR6F1	Homo sapiens olfactory receptor, family 6, subfamily F, member 1 (OR6F1), mRNA.	OR1-38; OR1-34; OST731	343169	NM_001005286.1	52627163	NP_001005286.1	1	1q44e	8.33557	0.0103828	4.17298	5.88679	141.069	-	0.00950494	0.00950494	#DIV/0!	#DIV/0!	#VALUE!	0.00227774	#VALUE!	#VALUE!	#DIV/0!	1
15663	CAACGTCAACTGGTTGAC	CACCCACTGAGGTACAATGTC	TAGAAGACGCACCGGCACCCACTGAGGTATAATGTTGTTAATATTCATAGCGACATTGTACCTCAGTGGGTGTTTTTTGGCAAGCAAAAGACGGCATACGAGATCCGTCAACCAGTTGACGTTGTTCGCCGTCTTCGT	CLL-H-043137	OR7G3	Homo sapiens olfactory receptor, family 7, subfamily G, member 3 (OR7G3), mRNA.	OST085	390883	NM_001001958.1	50080200	NP_001001958.1	19	19p13.2d	0.0176414	0.0103828	0.0140121	0.00513258	36.6295	-	3.93505	3.93505	#DIV/0!	#DIV/0!	#VALUE!	280.831	#VALUE!	#VALUE!	#DIV/0!	1
18301	CAGTGTCAGTTGTGTGGT	TGTCTGGTCCATGCCAGCTGT	TAGAAGACGCACCGGTGTCTGGTCTATGCCAGTTGTGTTAATATTCATAGCACAGCTGGCATGGACCAGACATTTTTTGGCAAGCAAAAGACGGCATACGAGATCCACCACACAACTGACACTGTTCGCCGTCTTCGT	CLL-H-045775	PSPN	Homo sapiens persephin (PSPN), mRNA.	PSP	5623	NM_004158.2	21614546	NP_004149.1	19	19p13.3a	20.3317	5.13951	12.7356	10.7425	84.3502	-	0.00950494	0.00950494	#DIV/0!	#DIV/0!	#VALUE!	0.000746328	#VALUE!	#VALUE!	#DIV/0!	1
19672	CAACTGACCACAGTCAGT	GCAAGGCAGTCCTATGTTTAC	TAGAAGACGCACCGGGCAAGGCAGTCTTATGTTTATGTTAATATTCATAGCGTAAACATAGGACTGCCTTGCTTTTTTGGCAAGCAAAAGACGGCATACGAGATCCACTGACTGTGGTCAGTTGTTCGCCGTCTTCGT	CLL-H-047146	RICS	Homo sapiens Rho GTPase-activating protein (RICS), mRNA.	KIAA0712; MGC1892; GRIT; GC-GAP; p250GAP; p200RhoGAP	9743	NM_001142685.1	29469070	NP_055530.2	11	11q24.3a-q24.3b	5.91869	8.46202	7.19036	1.79841	25.0113	8.93988	-	8.93988	#DIV/0!	#DIV/0!	1.24331	#VALUE!	#VALUE!	#VALUE!	#DIV/0!	1
26360	GTGTTGTGTGCACAACAC	AGCTACTATCAGAGCTTCTTT	TAGAAGACGCACCGGAGCTACTATCAGAGTTTCTTTGTTAATATTCATAGCAAAGAAGCTCTGATAGTAGCTTTTTTTGGCAAGCAAAAGACGGCATACGAGATCCGTGTTGTGCACACAACACTTCGCCGTCTTCGT	CLL-H-053834	YIPF2	Homo sapiens Yip1 domain family, member 2 (YIPF2), mRNA.	FinGER2; MGC3262	78992	NM_024029.3	34147591	NP_076934.1	19	19p13.2b	8.76778	13.207	10.9874	3.13899	28.569	-	8.74455	8.74455	#DIV/0!	#DIV/0!	#VALUE!	0.795872	#VALUE!	#VALUE!	#DIV/0!	1
27254	CATGGTTGTGACCATGTG	CCTCTGGTGTGGTAAATTGAC	TAGAAGACGCACCGGCCTCTGGTGTGGTAGATTGATGTTAATATTCATAGCGTCAATTTACCACACCAGAGGTTTTTTGGCAAGCAAAAGACGGCATACGAGATCCCACATGGTCACAACCATGTTCGCCGTCTTCGT	CLL-H-054728	ZNF645	Homo sapiens zinc finger protein 645 (ZNF645), mRNA.	HAKAIL; FLJ25735	158506	NM_152577.2	142371555	NP_689790.1	X	Xp22.11b	6.59789	12.2933	9.44559	4.02726	42.6364	6.40288	-	6.40288	#DIV/0!	#DIV/0!	0.67787	#VALUE!	#VALUE!	#VALUE!	#DIV/0!	1
27436	CAGTACTGACGTTGTGCA	CCTATCGGGAACCTGATTATT	TAGAAGACGCACCGGCCTATCGGGAACTTGATTATTGTTAATATTCATAGCAATAATCAGGTTCCCGATAGGTTTTTTGGCAAGCAAAAGACGGCATACGAGATCCTGCACAACGTCAGTACTGTTCGCCGTCTTCGT	CLL-H-054910	ZPBP2	Homo sapiens zona pellucida binding protein 2 (ZPBP2), transcript variant 1, mRNA.	ZPBPL; MGC41930	124626	NM_198844.2	84875534	NP_942141.2	17	17q12c	14.4395	0.0519142	7.2457	10.1736	140.408	-	9.06772	9.06772	#DIV/0!	#DIV/0!	#VALUE!	1.25146	#VALUE!	#VALUE!	#DIV/0!	1
22597	CAGTACACGTGTTGTGCA	TATTTGAAGGGCTTAACATAA	TAGAAGACGCACCGGTATTTGAAGGGCTTAACATAAGTTAATATTCATAGCTTATGTTAAGCCCTTCAAATATTTTTTGGCAAGCAAAAGACGGCATACGAGATCCTGCACAACACGTGTACTGTTCGCCGTCTTCGT	CLL-H-050071	SPINK8	Homo sapiens serine peptidase inhibitor, Kazal type 8 (putative) (SPINK8), mRNA.		646424	NM_001080525.1	122937481	NP_001073994.1	3	3p21.31f	0.0176414	-	0.0176414	#DIV/0!	#DIV/0!	9.556	27.3932	18.4746	12.6128	68.2711	541.68	1552.78	1047.23	714.956	#DIV/0!	1
10159	GTACTGCAGTTGCACACA	GGATCCCTTGGCTGGTATAAT	TAGAAGACGCACCGGGGATCTCTTGGTTGGTATAATGTTAATATTCATAGCATTATACCAGCCAAGGGATCCTTTTTTGGCAAGCAAAAGACGGCATACGAGATCCTGTGTGCAACTGCAGTACTTCGCCGTCTTCGT	CLL-H-037633	KIF11	Homo sapiens kinesin family member 11 (KIF11), mRNA.	KNSL1; EG5; HKSP; TRIP5	3832	NM_004523.3	13699823	NP_004514.2	10	10q23.33a	19.2644	4.39195	11.8282	10.5164	88.9099	366.704	361.321	364.012	3.80644	1.04569	31.0026	30.5475	30.775	0.321811	0.000503854	0	1.08532	36.034
10466	GTACTGACTGCATGTGAC	GCTGGTGGCTTTGTTGACTTT	TAGAAGACGCACCGGGCTGGTGGCTTTGTTGGCTTTGTTAATATTCATAGCAAAGTCAACAAAGCCACCAGCTTTTTTGGCAAGCAAAAGACGGCATACGAGATCCGTCACATGCAGTCAGTACTTCGCCGTCTTCGT	CLL-H-037940	KRT13	Homo sapiens keratin 13 (KRT13), transcript variant 2, mRNA.	MGC161462; CK13; K13; MGC3781	3860	NM_002274.3	131412227	NP_002265.2	17	17q21.2b	0.0882071	0.0415314	0.0648692	0.0330047	50.8788	3.34641	0.00950494	1.67796	2.35955	140.62	51.5871	0.146525	25.8668	36.374	0.435673	0	stdev.p	30.077
10139	TGACTGCATGCACAACCA	GCGTACAAGAACATCTATAAT	TAGAAGACGCACCGGGCGTACAAGAACATCTATAATGTTAATATTCATAGCATTATAGATGTTCTTGTACGCTTTTTTGGCAAGCAAAAGACGGCATACGAGATCCTGGTTGTGCATGCAGTCATTCGCCGTCTTCGT	CLL-H-037613	KIF11	Homo sapiens kinesin family member 11 (KIF11), mRNA.	KNSL1; EG5; HKSP; TRIP5	3832	NM_004523.3	13699823	NP_004514.2	10	10q23.33a	8.91773	8.45164	8.68469	0.329578	3.79494	256.707	155.444	206.076	71.6041	34.7465	29.5586	17.8986	23.7286	8.24487	0.0599412	0	0.823935	27.4819
27165	CAACTGGTACCACAACGT	GCTCACAATCACTTGATTGAT	TAGAAGACGCACCGGGCTCACAATCATTTGATTGATGTTAATATTCATAGCATCAATCAAGTGATTGTGAGCTTTTTTGGCAAGCAAAAGACGGCATACGAGATCCACGTTGTGGTACCAGTTGTTCGCCGTCTTCGT	CLL-H-054639	ZNF578	Homo sapiens zinc finger protein 578 (ZNF578), mRNA.	FLJ31384	147660	NM_001099694.1	22748994	NP_689685.1	19	19q13.41a	5.72464	16.976	11.3503	7.95589	70.0941	520.603	6.10217	263.352	363.807	138.144	45.8669	0.537622	23.2023	32.0526	0.430674	0		26.843
10146	GTTGACGTGTTGCACAAC	CCGATAAGATAGAAGATCAAA	TAGAAGACGCACCGGCCGATAAGATAGAAGATCAAAGTTAATATTCATAGCTTTGATCTTCTATCTTATCGGTTTTTTGGCAAGCAAAAGACGGCATACGAGATCCGTTGTGCAACACGTCAACTTCGCCGTCTTCGT	CLL-H-037620	KIF11	Homo sapiens kinesin family member 11 (KIF11), mRNA.	KNSL1; EG5; HKSP; TRIP5	3832	NM_004523.3	13699823	NP_004514.2	10	10q23.33a	14.7747	20.7449	17.7598	4.22161	23.7706	481.521	336.561	409.041	102.503	25.0592	27.113	18.9507	23.0318	5.7716	0.0326951	0		26.6362
10138	ACACTGCATGCACAACGT	CCGATAAGATAGAAGATCAAA	TAGAAGACGCACCGGCCGATAAGATAGAAGATCAAAGTTAATATTCATAGCTTTGATCTTCTATCTTATCGGTTTTTTGGCAAGCAAAAGACGGCATACGAGATCCACGTTGTGCATGCAGTGTTTCGCCGTCTTCGT	CLL-H-037612	KIF11	Homo sapiens kinesin family member 11 (KIF11), mRNA.	KNSL1; EG5; HKSP; TRIP5	3832	NM_004523.3	13699823	NP_004514.2	10	10q23.33a	9.74688	21.3264	15.5366	8.18794	52.7009	367.368	333.49	350.429	23.9554	6.83601	23.6453	21.4648	22.5551	1.54187	0.00284508	0		26.0576
25291	ACTGCAACCATGTGTGCA	CCCTACGGTTGTTCGTGTATG	TAGAAGACGCACCGGCCCTATGGTTGTTTGTGTATGGTTAATATTCATAGCCATACACGAACAACCGTAGGGTTTTTTGGCAAGCAAAAGACGGCATACGAGATCCTGCACACATGGTTGCAGTTTCGCCGTCTTCGT	CLL-H-052765	TTLL12	Homo sapiens tubulin tyrosine ligase-like family, member 12 (TTLL12), mRNA.	FLJ41795; KIAA0153; dJ526I14.2	23170	NM_015140.2	57617038	NP_055955.1	22	22q13.2c	14.7306	7.92211	11.3263	4.81431	42.5054	22.8571	449.413	236.135	301.62	127.732	2.01805	39.6785	20.8483	26.63	0.402445	0		23.9861
17218	TGCATGACGTTGCACAGT	CGATACTACCTACGGCAAATT	TAGAAGACGCACCGGCGATACTACCTACGGTAAATTGTTAATATTCATAGCAATTTGCCGTAGGTAGTATCGTTTTTTGGCAAGCAAAAGACGGCATACGAGATCCACTGTGCAACGTCATGCATTCGCCGTCTTCGT	CLL-H-044692	PLK1	Homo sapiens polo-like kinase 1 (Drosophila) (PLK1), mRNA.	PLK; STPK13	5347	NM_005030.3	34147632	NP_005021.2	16	16p12.1c	20.1289	34.3984	27.2636	10.0901	37.0093	620.874	491.215	556.045	91.6827	16.4884	22.773	18.0173	20.3951	3.36282	0.0148746	0		23.4361
10149	TGGTACGTGTTGCACACA	GCGTACAAGAACATCTATAAT	TAGAAGACGCACCGGGCGTACAAGAACATCTATAATGTTAATATTCATAGCATTATAGATGTTCTTGTACGCTTTTTTGGCAAGCAAAAGACGGCATACGAGATCCTGTGTGCAACACGTACCATTCGCCGTCTTCGT	CLL-H-037623	KIF11	Homo sapiens kinesin family member 11 (KIF11), mRNA.	KNSL1; EG5; HKSP; TRIP5	3832	NM_004523.3	13699823	NP_004514.2	10	10q23.33a	6.35973	15.1174	10.7386	6.19263	57.6671	227.991	200.982	214.487	19.0982	8.90416	21.231	18.7159	19.9735	1.77847	0.0048199	0		22.9243
10150	GTGTACGTGTTGCACATG	GCGTACAAGAACATCTATAAT	TAGAAGACGCACCGGGCGTACAAGAACATCTATAATGTTAATATTCATAGCATTATAGATGTTCTTGTACGCTTTTTTGGCAAGCAAAAGACGGCATACGAGATCCCATGTGCAACACGTACACTTCGCCGTCTTCGT	CLL-H-037624	KIF11	Homo sapiens kinesin family member 11 (KIF11), mRNA.	KNSL1; EG5; HKSP; TRIP5	3832	NM_004523.3	13699823	NP_004514.2	10	10q23.33a	15.5421	3.08371	9.3129	8.8094	94.5936	211.078	154.142	182.61	40.2599	22.0469	22.6651	16.5514	19.6083	4.32302	0.0271322	0		22.4811
17217	ACCATGACGTTGCACATG	CGATACTACCTACGGCAAATT	TAGAAGACGCACCGGCGATACTACCTACGGTAAATTGTTAATATTCATAGCAATTTGCCGTAGGTAGTATCGTTTTTTGGCAAGCAAAAGACGGCATACGAGATCCCATGTGCAACGTCATGGTTTCGCCGTCTTCGT	CLL-H-044691	PLK1	Homo sapiens polo-like kinase 1 (Drosophila) (PLK1), mRNA.	PLK; STPK13	5347	NM_005030.3	34147632	NP_005021.2	16	16p12.1c	29.8228	26.0506	27.9367	2.66737	9.54793	488.262	513.486	500.874	17.8356	3.5609	17.4775	18.3803	17.9289	0.63843	0.000726227	0		20.4428
3455	CATGCAACGTACTGACGT	AGATTGGAAGTGGTGCAACAA	TAGAAGACGCACCGGAGATTGGAAGTGGTGTAACAAGTTAATATTCATAGCTTGTTGCACCACTTCCAATCTTTTTTTGGCAAGCAAAAGACGGCATACGAGATCCACGTCAGTACGTTGCATGTTCGCCGTCTTCGT	CLL-H-030929	CIC	Homo sapiens capicua homolog (Drosophila) (CIC), mRNA.	KIAA0306	23152	NM_015125.3	112421107	NP_055940.3	19	19q13.2c	4.23394	0.238806	2.23637	2.82499	126.32	37.4267	41.8883	39.6575	3.15484	7.95522	16.7354	18.7305	17.7329	1.4107	0.00634244	0		20.205
10158	TGACTGCAGTTGCACATG	GGATCCCTTGGCTGGTATAAT	TAGAAGACGCACCGGGGATCTCTTGGTTGGTATAATGTTAATATTCATAGCATTATACCAGCCAAGGGATCCTTTTTTGGCAAGCAAAAGACGGCATACGAGATCCCATGTGCAACTGCAGTCATTCGCCGTCTTCGT	CLL-H-037632	KIF11	Homo sapiens kinesin family member 11 (KIF11), mRNA.	KNSL1; EG5; HKSP; TRIP5	3832	NM_004523.3	13699823	NP_004514.2	10	10q23.33a	46.785	11.8261	29.3055	24.7197	84.3517	481.134	544.918	513.026	45.1021	8.79137	16.4179	18.5944	17.5061	1.53903	0.00560513	0		19.9297
10145	TGTGACGTGTTGCACAGT	CCGATAAGATAGAAGATCAAA	TAGAAGACGCACCGGCCGATAAGATAGAAGATCAAAGTTAATATTCATAGCTTTGATCTTCTATCTTATCGGTTTTTTGGCAAGCAAAAGACGGCATACGAGATCCACTGTGCAACACGTCACATTCGCCGTCTTCGT	CLL-H-037619	KIF11	Homo sapiens kinesin family member 11 (KIF11), mRNA.	KNSL1; EG5; HKSP; TRIP5	3832	NM_004523.3	13699823	NP_004514.2	10	10q23.33a	34.2949	13.29	23.7925	14.8527	62.4259	490.147	331	410.573	112.534	27.4089	20.6009	13.912	17.2564	4.7298	0.0404671	0		19.6267
3501	CAACTGACTGCACAACGT	GCTAACATAGACGACTTGAAA	TAGAAGACGCACCGGGCTAACATAGACGATTTGAAAGTTAATATTCATAGCTTTCAAGTCGTCTATGTTAGCTTTTTTGGCAAGCAAAAGACGGCATACGAGATCCACGTTGTGCAGTCAGTTGTTCGCCGTCTTCGT	CLL-H-030975	CKAP5	Homo sapiens cytoskeleton associated protein 5 (CKAP5), transcript variant 1, mRNA.	KIAA0097; TOGp; FLJ35359; TOG; ch-TOG	9793	NM_001008938.1	57164941	NP_001008938.1	11	11p11.2b	27.3442	47.1797	37.2619	14.0258	37.6411	621.672	627.222	624.447	3.92444	0.628467	16.6838	16.8328	16.7583	0.10532	0.000307476	0		19.0221
21973	CAGTCAACCAGTTGACAC	GCCTTTCTCGTGTCTGTGATA	TAGAAGACGCACCGGGCCTTTCTTGTGTTTGTGATAGTTAATATTCATAGCTATCACAGACACGAGAAAGGCTTTTTTGGCAAGCAAAAGACGGCATACGAGATCCGTGTCAACTGGTTGACTGTTCGCCGTCTTCGT	CLL-H-049447	SLC6A16	Homo sapiens solute carrier family 6, member 16 (SLC6A16), mRNA.	NTT5	28968	NM_014037.2	55749588	NP_054756.2	19	19q13.33a	4.35743	17.0383	10.6978	8.9667	83.8178	168.275	187.095	177.685	13.3079	7.48962	15.7298	17.4891	16.6094	1.24398	0.00458553	0		18.8414
10157	ACACTGCAGTTGCACAAC	GGATCCCTTGGCTGGTATAAT	TAGAAGACGCACCGGGGATCTCTTGGTTGGTATAATGTTAATATTCATAGCATTATACCAGCCAAGGGATCCTTTTTTGGCAAGCAAAAGACGGCATACGAGATCCGTTGTGCAACTGCAGTGTTTCGCCGTCTTCGT	CLL-H-037631	KIF11	Homo sapiens kinesin family member 11 (KIF11), mRNA.	KNSL1; EG5; HKSP; TRIP5	3832	NM_004523.3	13699823	NP_004514.2	10	10q23.33a	48.2228	56.9188	52.5708	6.14899	11.6966	900.439	811.485	855.962	62.9001	7.34848	17.1281	15.436	16.2821	1.19648	0.00307993	0		18.4441
10148	ACGTACGTGTTGCACAGT	GCGTACAAGAACATCTATAAT	TAGAAGACGCACCGGGCGTACAAGAACATCTATAATGTTAATATTCATAGCATTATAGATGTTCTTGTACGCTTTTTTGGCAAGCAAAAGACGGCATACGAGATCCACTGTGCAACACGTACGTTTCGCCGTCTTCGT	CLL-H-037622	KIF11	Homo sapiens kinesin family member 11 (KIF11), mRNA.	KNSL1; EG5; HKSP; TRIP5	3832	NM_004523.3	13699823	NP_004514.2	10	10q23.33a	7.56817	14.4529	11.0105	4.86826	44.2145	117.741	212.911	165.326	67.2955	40.7048	10.6934	19.337	15.0152	6.11191	0.0837521	0		16.9065
23896	CACATGACACTGGTACCA	GACTGCTCTTTGACCAGTTTA	TAGAAGACGCACCGGGACTGCTCTTTGACTAGTTTAGTTAATATTCATAGCTAAACTGGTCAAAGAGCAGTCTTTTTTGGCAAGCAAAAGACGGCATACGAGATCCTGGTACCAGTGTCATGTGTTCGCCGTCTTCGT	CLL-H-051370	THEM4	Homo sapiens thioesterase superfamily member 4 (THEM4), mRNA.	CTMP; MGC29636	117145	NM_053055.3	76159292	NP_444283.2	1	1q21.3a	2.79616	3.634	3.21508	0.592438	18.4268	32.0144	47.9144	39.9644	11.243	28.1325	9.95758	14.903	12.4303	3.49696	0.0438641	0		13.7693
20623	GTGTACTGGTACACTGGT	CACTCAGATGTGCAGGTGTTA	TAGAAGACGCACCGGCACTTAGATGTGTAGGTGTTAGTTAATATTCATAGCTAACACCTGCACATCTGAGTGTTTTTTGGCAAGCAAAAGACGGCATACGAGATCCACCAGTGTACCAGTACACTTCGCCGTCTTCGT	CLL-H-048097	SECISBP2	Homo sapiens SECIS binding protein 2 (SECISBP2), mRNA.	DKFZp686C09169; SBP2	79048	NM_024077.3	83779009	NP_076982.3	9	9q22.2a	3.05196	0.0622971	1.55713	2.11401	135.763	21.7698	16.3295	19.0496	3.84688	20.194	13.9807	10.4869	12.2338	2.47049	0.0300712	0		13.5308
10147	CATGACGTGTTGCACACA	CCGATAAGATAGAAGATCAAA	TAGAAGACGCACCGGCCGATAAGATAGAAGATCAAAGTTAATATTCATAGCTTTGATCTTCTATCTTATCGGTTTTTTGGCAAGCAAAAGACGGCATACGAGATCCTGTGTGCAACACGTCATGTTCGCCGTCTTCGT	CLL-H-037621	KIF11	Homo sapiens kinesin family member 11 (KIF11), mRNA.	KNSL1; EG5; HKSP; TRIP5	3832	NM_004523.3	13699823	NP_004514.2	10	10q23.33a	29.9816	17.464	23.7228	8.8513	37.3114	323.37	255.103	289.236	48.2718	16.6894	13.6312	10.7535	12.1924	2.03483	0.0166566	0		13.4805
13126	CACACAACACCACAACGT	GCAGACATTGAGCGAATAAAT	TAGAAGACGCACCGGGCAGACATTGAGTGAATAAATGTTAATATTCATAGCATTTATTCGCTCAATGTCTGCTTTTTTGGCAAGCAAAAGACGGCATACGAGATCCACGTTGTGGTGTTGTGTGTTCGCCGTCTTCGT	CLL-H-040600	NDC80	Homo sapiens NDC80 homolog, kinetochore complex component (S. cerevisiae) (NDC80), mRNA.	HEC; hsNDC80; TID3; KNTC2; HEC1	10403	NM_006101.2	5174456	NP_006092.1	18	18p11.32a	39.5344	35.9247	37.7295	2.55247	6.76519	479.842	403.181	441.511	54.2076	12.2777	12.7179	10.6861	11.702	1.43674	0.00891094	0		12.8853
3502	ACTGTGACTGCACAACTG	CCAGAGGAATTTCCAAGCATA	TAGAAGACGCACCGGCCAGAGGAATTTCCAAGTATAGTTAATATTCATAGCTATGCTTGGAAATTCCTCTGGTTTTTTGGCAAGCAAAAGACGGCATACGAGATCCCAGTTGTGCAGTCACAGTTTCGCCGTCTTCGT	CLL-H-030976	CKAP5	Homo sapiens cytoskeleton associated protein 5 (CKAP5), transcript variant 1, mRNA.	KIAA0097; TOGp; FLJ35359; TOG; ch-TOG	9793	NM_001008938.1	57164941	NP_001008938.1	11	11p11.2b	37.9643	44.9681	41.4662	4.95244	11.9433	512.098	429.11	470.604	58.6811	12.4693	12.3498	10.3484	11.3491	1.41516	0.00928484	0		12.457
10096	CAGTGTTGGTGTTGTGAC	GGTTTAGCAATAATGGGTTTA	TAGAAGACGCACCGGGGTTTAGCAATAATGGGTTTAGTTAATATTCATAGCTAAACCCATTATTGCTAAACCTTTTTTGGCAAGCAAAAGACGGCATACGAGATCCGTCACAACACCAACACTGTTCGCCGTCTTCGT	CLL-H-037570	KIAA1409	Homo sapiens KIAA1409 (KIAA1409), mRNA.	FLJ43337	57578	NM_020818.3	150456443	NP_065869.3	14	14q32.13a	0.0352828	3.00064	1.51796	2.09683	138.134	12.7333	18.3921	15.5627	4.00136	25.7113	8.3884	12.1163	10.2523	2.63601	0.0480328	0		11.1259
21240	GTACCACACACAACACCA	CCCTGCAAGAGCGAGTCTGAT	TAGAAGACGCACCGGCCCTGTAAGAGCGAGTTTGATGTTAATATTCATAGCATCAGACTCGCTCTTGCAGGGTTTTTTGGCAAGCAAAAGACGGCATACGAGATCCTGGTGTTGTGTGTGGTACTTCGCCGTCTTCGT	CLL-H-048714	SIX5	Homo sapiens SIX homeobox 5 (SIX5), mRNA.	DMAHP; BOR2	147912	NM_175875.4	40354215	NP_787071.2	19	19q13.32a	0.396932	9.44839	4.92266	6.40035	130.018	16.2126	83.1968	49.7047	47.365	95.2928	3.29346	16.9008	10.0971	9.62182	0.316272	0		10.9375
3498	ACACTGACTGCACAACAC	CCTGCAGCTTTAGTTTACTAA	TAGAAGACGCACCGGCCTGCAGCTTTAGTTTATTAAGTTAATATTCATAGCTTAGTAAACTAAAGCTGCAGGTTTTTTGGCAAGCAAAAGACGGCATACGAGATCCGTGTTGTGCAGTCAGTGTTTCGCCGTCTTCGT	CLL-H-030972	CKAP5	Homo sapiens cytoskeleton associated protein 5 (CKAP5), transcript variant 1, mRNA.	KIAA0097; TOGp; FLJ35359; TOG; ch-TOG	9793	NM_001008938.1	57164941	NP_001008938.1	11	11p11.2b	64.7263	65.4327	65.0795	0.499485	0.7675	744.982	565.848	655.415	126.666	19.3261	11.4472	8.69472	10.071	1.94633	0.0222543	0		10.9058
5990	GTGTTGCAACTGCAACAC	GCTGCCTGAGTACAAGGCTGT	TAGAAGACGCACCGGGCTGCTTGAGTACAAGGTTGTGTTAATATTCATAGCACAGCCTTGTACTCAGGCAGCTTTTTTGGCAAGCAAAAGACGGCATACGAGATCCGTGTTGCAGTTGCAACACTTCGCCGTCTTCGT	CLL-H-033464	ERAS	Homo sapiens ES cell expressed Ras (ERAS), mRNA.	MGC126693; HRASP; MGC126691; HRAS2	3266	NM_181532.2	31581555	NP_853510.1	X	Xp11.23c	0.0793864	2.38806	1.23372	1.63248	132.321	6.19751	18.6012	12.3993	8.77072	70.7353	5.02343	15.0773	10.0504	7.10916	0.218751	0		10.8808
17219	GTCATGACGTTGCACAAC	CGATACTACCTACGGCAAATT	TAGAAGACGCACCGGCGATACTACCTACGGTAAATTGTTAATATTCATAGCAATTTGCCGTAGGTAGTATCGTTTTTTGGCAAGCAAAAGACGGCATACGAGATCCGTTGTGCAACGTCATGACTTCGCCGTCTTCGT	CLL-H-044693	PLK1	Homo sapiens polo-like kinase 1 (Drosophila) (PLK1), mRNA.	PLK; STPK13	5347	NM_005030.3	34147632	NP_005021.2	16	16p12.1c	47.9935	44.9474	46.4704	2.15392	4.63504	413.626	483.203	448.415	49.198	10.9715	8.90085	10.3981	9.64946	1.0587	0.0074218	0		10.3942
16629	CAGTACTGTGCAGTCACA	CCCACGATTTAGGGTAACTGT	TAGAAGACGCACCGGCCCATGATTTAGGGTAATTGTGTTAATATTCATAGCACAGTTACCCTAAATCGTGGGTTTTTTGGCAAGCAAAAGACGGCATACGAGATCCTGTGACTGCACAGTACTGTTCGCCGTCTTCGT	CLL-H-044103	PEX5	Homo sapiens peroxisomal biogenesis factor 5 (PEX5), mRNA.	PTS1R; PXR1	5830	NM_000319.4	37059745	NP_000310.2	12	12p13.31c	14.7129	6.16741	10.4402	6.0426	57.8783	19.1966	179.786	99.4913	113.554	114.134	1.83872	17.2206	9.52966	10.8766	0.383446	0		10.2488
10161	ACTGTGCAGTTGCACATG	GAAGTACATAAGACCTTATTT	TAGAAGACGCACCGGGAAGTACATAAGACCTTATTTGTTAATATTCATAGCAAATAAGGTCTTATGTACTTCTTTTTTGGCAAGCAAAAGACGGCATACGAGATCCCATGTGCAACTGCACAGTTTCGCCGTCTTCGT	CLL-H-037635	KIF11	Homo sapiens kinesin family member 11 (KIF11), mRNA.	KNSL1; EG5; HKSP; TRIP5	3832	NM_004523.3	13699823	NP_004514.2	10	10q23.33a	36.0943	30.3387	33.2165	4.06985	12.2525	357.68	273.704	315.692	59.3795	18.8093	10.7681	8.24001	9.50407	1.78765	0.0214853	0		10.2177
26541	CAGTACGTACTGTGACTG	GCTTTGAGTGTGGAAAGGCTT	TAGAAGACGCACCGGGCTTTGGGTGTGGAAAGGTTTGTTAATATTCATAGCAAGCCTTTCCACACTCAAAGCTTTTTTGGCAAGCAAAAGACGGCATACGAGATCCCAGTCACAGTACGTACTGTTCGCCGTCTTCGT	CLL-H-054015	ZFP3	Homo sapiens zinc finger protein 3 homolog (mouse) (ZFP3), mRNA.	FLJ30726; ZNF752	124961	NM_153018.2	87116670	NP_694563.1	17	17p13.2b	11.8197	3.18753	7.50364	6.1039	81.3458	125.871	13.2499	69.5605	79.6352	114.483	16.7747	1.76579	9.27023	10.6129	0.38645	0		9.93392
20899	GTCATGACACACACACTG	CCCTGAGATTGATGAGAAGTT	TAGAAGACGCACCGGCCCTGAGATTGGTGAGAGGTTGTTAATATTCATAGCAACTTCTCATCAATCTCAGGGTTTTTTGGCAAGCAAAAGACGGCATACGAGATCCCAGTGTGTGTGTCATGACTTCGCCGTCTTCGT	CLL-H-048373	SF3B4	Homo sapiens splicing factor 3b, subunit 4, 49kDa (SF3B4), mRNA.	SF3b49; SAP49; MGC10828	10262	NM_005850.3	23111059	NP_005841.1	1	1q21.2a	6.97718	22.6035	14.7903	11.0495	74.7073	171.984	85.5635	128.774	61.1084	47.4541	11.6281	5.7851	8.70662	4.13165	0.121867	0		9.24987
24095	CAGTCAGTACTGACTGGT	GCTGGGCTATCAGTAGTAAGT	TAGAAGACGCACCGGGCTGGGTTATTAGTAGTAAGTGTTAATATTCATAGCACTTACTACTGATAGCCCAGCTTTTTTGGCAAGCAAAAGACGGCATACGAGATCCACCAGTCAGTACTGACTGTTCGCCGTCTTCGT	CLL-H-051569	TMEM144	Homo sapiens transmembrane protein 144 (TMEM144), mRNA.	FLJ11155	55314	NM_018342.4	141801688	NP_060812.2	4	4q32.1d-q32.1e	2.95494	0.0622971	1.50862	2.0454	135.581	14.9924	11.0352	13.0138	2.79814	21.5013	9.93785	7.31481	8.62633	1.85477	0.0425055	0		9.15243
3499	TGACTGACTGCACAACTG	GCACAGAACATAAGCTCCAAT	TAGAAGACGCACCGGGCACAGAACATAAGCTTCAATGTTAATATTCATAGCATTGGAGCTTATGTTCTGTGCTTTTTTGGCAAGCAAAAGACGGCATACGAGATCCCAGTTGTGCAGTCAGTCATTCGCCGTCTTCGT	CLL-H-030973	CKAP5	Homo sapiens cytoskeleton associated protein 5 (CKAP5), transcript variant 1, mRNA.	KIAA0097; TOGp; FLJ35359; TOG; ch-TOG	9793	NM_001008938.1	57164941	NP_001008938.1	11	11p11.2b	25.4036	50.035	37.7193	17.417	46.1752	236.134	410.699	323.416	123.436	38.1664	6.26028	10.8883	8.57429	3.2725	0.0834505	0		9.08927
10162	TGTGTGCAGTTGCACAGT	GAAGTACATAAGACCTTATTT	TAGAAGACGCACCGGGAAGTACATAAGACCTTATTTGTTAATATTCATAGCAAATAAGGTCTTATGTACTTCTTTTTTGGCAAGCAAAAGACGGCATACGAGATCCACTGTGCAACTGCACACATTCGCCGTCTTCGT	CLL-H-037636	KIF11	Homo sapiens kinesin family member 11 (KIF11), mRNA.	KNSL1; EG5; HKSP; TRIP5	3832	NM_004523.3	13699823	NP_004514.2	10	10q23.33a	22.5016	25.3134	23.9075	1.98822	8.3163	212.431	195.792	204.112	11.7652	5.76408	8.88553	8.18958	8.53755	0.492112	0.00218494	0		9.04468
2826	TGTGCAGTTGGTCAACAC	GCCCAGGTCCTCTACTGTGAA	TAGAAGACGCACCGGGCCCAGGTTCTCTATTGTGAAGTTAATATTCATAGCTTCACAGTAGAGGACCTGGGCTTTTTTGGCAAGCAAAAGACGGCATACGAGATCCGTGTTGACCAACTGCACATTCGCCGTCTTCGT	CLL-H-030300	CCM2	Homo sapiens cerebral cavernous malformation 2 (CCM2), transcript variant 2, mRNA.	MGC4067; MGC4607; C7orf22; PP10187; MGC74868	83605	NM_001029835.2	71067339	NP_113631.1	7	7p13c	40.9457	30.8371	35.8914	7.1479	19.9154	355.831	255.141	305.486	71.1986	23.3066	9.91411	7.1087	8.51141	1.98372	0.0334663	0		9.01295
8922	GTGTCATGCAACACACCA	GCGATAAGTACCGTTGAGTTT	TAGAAGACGCACCGGGCGATAAGTACTGTTGAGTTTGTTAATATTCATAGCAAACTCAACGGTACTTATCGCTTTTTTGGCAAGCAAAAGACGGCATACGAGATCCTGGTGTGTTGCATGACACTTCGCCGTCTTCGT	CLL-H-036396	HRASLS	Homo sapiens HRAS-like suppressor (HRASLS), mRNA.	HSD28; A-C1; H-REV107; HRASLS1	57110	NM_020386.3	38455407	NP_065119.1	3	3q29b	12.1638	12.6982	12.431	0.377929	3.04021	6.82572	201.952	104.389	137.975	132.174	0.549089	16.2458	8.39745	11.0993	0.445408	0		8.87464
26051	CATGACCACAGTGTTGGT	GTGCTGGATCGTGTGCATGTT	TAGAAGACGCACCGGGTGCTGGATTGTGTGTATGTTGTTAATATTCATAGCAACATGCACACGATCCAGCACTTTTTTGGCAAGCAAAAGACGGCATACGAGATCCACCAACACTGTGGTCATGTTCGCCGTCTTCGT	CLL-H-053525	VN1R4	Homo sapiens vomeronasal 1 receptor 4 (VN1R4), mRNA.	V1RL4	317703	NM_173857.2	71361646	NP_776256.2	19	19q13.41b	1.90527	1.33939	1.62233	0.400141	24.6646	17.614	9.05821	13.3361	6.04984	45.3644	10.8572	5.58346	8.22033	3.7291	0.111913	0		8.65967
1152	ACTGGTACTGTGGTACCA	CTTGTCTACTTTACATCAGAT	TAGAAGACGCACCGGCTTGTCTACTTTACATCAGATGTTAATATTCATAGCATCTGATGTAAAGTAGACAAGTTTTTTGGCAAGCAAAAGACGGCATACGAGATCCTGGTACCACAGTACCAGTTTCGCCGTCTTCGT	CLL-H-028626	ARSF	Homo sapiens arylsulfatase F (ARSF), mRNA.	ASF	416	NM_004042.3	31742481	NP_004033.2	X	Xp22.33b	3.63413	2.52303	3.07858	0.785665	25.5204	26.9646	23.097	25.0308	2.7348	10.9257	8.75877	7.50248	8.13063	0.88833	0.00829608	0		8.5508
137	CACACACACAACGTACAC	CGGGATTAACTTGCATGGTTT	TAGAAGACGCACCGGCGGGATTAACTTGTATGGTTTGTTAATATTCATAGCAAACCATGCAAGTTAATCCCGTTTTTTGGCAAGCAAAAGACGGCATACGAGATCCGTGTACGTTGTGTGTGTGTTCGCCGTCTTCGT	CLL-H-027611	ACSM2B	Homo sapiens acyl-CoA synthetase medium-chain family member 2B (ACSM2B), nuclear gene encoding mitochondrial protein, mRNA.	HYST1046; HXMA; ACSM2	348158	NM_001105069.1	52138579	NP_872423.2	16	16p12.3a	24.0982	7.11225	15.6052	12.0109	76.967	216.212	28.6764	122.444	132.608	108.301	13.8551	1.83762	7.84637	8.49766	0.374168	0		8.2058
6782	ACACTGCAGTCACAACAC	CGTGGATTGCTACAAGAACTT	TAGAAGACGCACCGGCGTGGATTGCTACAAGAATTTGTTAATATTCATAGCAAGTTCTTGTAGCAATCCACGTTTTTTGGCAAGCAAAAGACGGCATACGAGATCCGTGTTGTGACTGCAGTGTTTCGCCGTCTTCGT	CLL-H-034256	FHL1	Homo sapiens four and a half LIM domains 1 (FHL1), mRNA.	KYO-T; SLIM1; MGC111107; XMPMA; FHL1B; bA535K18.1	2273	NM_001159699.1	34147646	NP_001440.2	X	Xq26.3b	60.7835	61.7053	61.2444	0.651805	1.06427	835.745	121.606	478.676	504.973	105.494	13.6461	1.98559	7.81583	8.24521	0.362865	0		8.16874
17365	CAGTGTACTGTGTGACCA	GATCGCAGTGCTCCGTAGGAT	TAGAAGACGCACCGGGATCGTAGTGCTCTGTAGGATGTTAATATTCATAGCATCCTACGGAGCACTGCGATCTTTTTTGGCAAGCAAAAGACGGCATACGAGATCCTGGTCACACAGTACACTGTTCGCCGTCTTCGT	CLL-H-044839	PNCK	Homo sapiens pregnancy upregulated non-ubiquitously expressed CaM kinase (PNCK), mRNA.	MGC45419; CaMK1b; BSTK3	139728	NM_001039582.3	88759330	NP_001034671.1	X	Xq28f	6.85369	21.316	14.0848	10.2264	72.6057	201.051	16.1109	108.581	130.772	120.438	14.2743	1.14385	7.70905	9.2846	0.415481	0		8.03914
22587	CAACACGTTGTGCAACGT	GCCAGACATATGGCAATAAAT	TAGAAGACGCACCGGGCCAGACATATGGTAATAAATGTTAATATTCATAGCATTTATTGCCATATGTCTGGCTTTTTTGGCAAGCAAAAGACGGCATACGAGATCCACGTTGCACAACGTGTTGTTCGCCGTCTTCGT	CLL-H-050061	SPINK6	Homo sapiens serine peptidase inhibitor, Kazal type 6 (SPINK6), mRNA.	MGC21394; UNQ844; BUSI2	404203	NM_205841.2	68299792	NP_995313.2	5	5q33.1a	7.26826	7.43412	7.35119	0.11728	1.59539	69.8639	43.295	56.5795	18.7871	33.2047	9.50375	5.88952	7.69664	2.55565	0.0657258	0		8.02407
5682	CAGTTGTGTGGTGTACCA	GCACACTAACAGGCAATATAT	TAGAAGACGCACCGGGCACACTAACAGGTAATATATGTTAATATTCATAGCATATATTGCCTGTTAGTGTGCTTTTTTGGCAAGCAAAAGACGGCATACGAGATCCTGGTACACCACACAACTGTTCGCCGTCTTCGT	CLL-H-033156	EGFLAM	Homo sapiens EGF-like, fibronectin type III and laminin G domains (EGFLAM), transcript variant 1, mRNA.	AGRINL; AGRNL; FLJ39155	133584	NM_152403.2	33469928	NP_689616.2	5	5p13.2a-p13.1c	23.1896	10.2583	16.7239	9.14387	54.6753	130.981	126.14	128.561	3.42321	2.66272	7.83196	7.54248	7.68722	0.204689	0.00378923	0		8.01264
24365	CATGTGTGACCAGTACGT	CGTCATCGACTTTGTGGCTTT	TAGAAGACGCACCGGCGTCATTGACTTTGTGGCTTTGTTAATATTCATAGCAAAGCCACAAAGTCGATGACGTTTTTTGGCAAGCAAAAGACGGCATACGAGATCCACGTACTGGTCACACATGTTCGCCGTCTTCGT	CLL-H-051839	TNFRSF6B	Homo sapiens tumor necrosis factor receptor superfamily, member 6b, decoy (TNFRSF6B), transcript variant M68C, mRNA.	DJ583P15.1.1; M68; TR6; DCR3	8771	NM_003823.2	29893809	NP_116563.1	20	20q13.33e	0.141131	13.0305	6.5858	9.11414	138.391	0.0604046	101.057	50.5585	71.4151	141.252	0.00917193	15.3446	7.67689	10.8438	0.478756	0		8.0001
5624	GTGTGTGTGTGTTGTGCA	GTCTACCTTACAGGGTATAAC	TAGAAGACGCACCGGGTCTACCTTACAGGGTATAATGTTAATATTCATAGCGTTATACCCTGTAAGGTAGACTTTTTTGGCAAGCAAAAGACGGCATACGAGATCCTGCACAACACACACACACTTCGCCGTCTTCGT	CLL-H-033098	EEF1E1	Homo sapiens eukaryotic translation elongation factor 1 epsilon 1 (EEF1E1), mRNA.	AIMP3; P18	9521	NM_001135650.1	142383866	NP_004271.1	6	6p24.3c	5.90105	15.6262	10.7636	6.87671	63.8884	97.6621	66.5441	82.1031	22.0037	26.8001	9.07335	6.18232	7.62783	2.04427	0.0484495	0		7.94057
6035	ACGTGTACCACACAACGT	CCACCATACCTGGACAAATAT	TAGAAGACGCACCGGCCACCATACCTGGATAAATATGTTAATATTCATAGCATATTTGTCCAGGTATGGTGGTTTTTTGGCAAGCAAAAGACGGCATACGAGATCCACGTTGTGTGGTACACGTTTCGCCGTCTTCGT	CLL-H-033509	ERRFI1	Homo sapiens ERBB receptor feedback inhibitor 1 (ERRFI1), mRNA.	GENE-33; MIG-6; RALT; MIG6	54206	NM_018948.3	21314673	NP_061821.1	1	1p36.23b	19.6437	18.8449	19.2443	0.564865	2.93523	11.8635	279.911	145.887	189.538	129.921	0.616466	14.5451	7.58081	9.84906	0.444439	0		7.88349
8288	CACAGTACACACTGTGTG	CTTCGCCAAGAAGAATGGCAT	TAGAAGACGCACCGGCTTCGCTAAGAAGAATGGTATGTTAATATTCATAGCATGCCATTCTTCTTGGCGAAGTTTTTTGGCAAGCAAAAGACGGCATACGAGATCCCACACAGTGTGTACTGTGTTCGCCGTCTTCGT	CLL-H-035762	GSTT2	Homo sapiens glutathione S-transferase theta 2 (GSTT2), mRNA.		653689	NM_000854.3	124249393	NP_001074312.1		22q11.23a-q11.23b	0.0352828	3.34328	1.68928	2.33911	138.468	19.6436	5.67445	12.659	9.87765	78.0287	11.6284	3.35909	7.49373	5.84726	0.266029	0		7.7778
4208	GTTGTGGTTGGTACTGGT	GTTTATGAAAGGCCCAACTTT	TAGAAGACGCACCGGGTTTATGAAAGGCCTAACTTTGTTAATATTCATAGCAAAGTTGGGCCTTTCATAAACTTTTTTGGCAAGCAAAAGACGGCATACGAGATCCACCAGTACCAACCACAACTTCGCCGTCTTCGT	CLL-H-031682	CRYGS	Homo sapiens crystallin, gamma S (CRYGS), mRNA.	CRYG8	1427	NM_017541.2	13377003	NP_060011.1	3	3q27.3a	2.2581	4.25697	3.25753	1.41341	43.389	18.7375	28.5624	23.6499	6.94722	29.3752	5.75205	8.76809	7.26007	2.13266	0.0554535	0		7.49421
1787	GTACTGGTGTTGACACCA	CCCGCTATCCTGCCAACTCTA	TAGAAGACGCACCGGCCCGCTATCCTGTCAACTTTAGTTAATATTCATAGCTAGAGTTGGCAGGATAGCGGGTTTTTTGGCAAGCAAAAGACGGCATACGAGATCCTGGTGTCAACACCAGTACTTCGCCGTCTTCGT	CLL-H-029261	BRI3	Homo sapiens brain protein I3 (BRI3), mRNA.	I3	25798	NM_001159491.1	48928020	NP_056194.1	7	7q21.3d	4.38389	0.0830628	2.23348	3.04114	136.162	7.90092	23.8859	15.8934	11.3031	71.1181	3.5375	10.6945	7.116	5.06077	0.240649	0		7.31936
10121	GTTGGTTGGTGTTGTGAC	TAACACCTGGGTCCAGTAATA	TAGAAGACGCACCGGTAACACCTGGGTCTAGTAATAGTTAATATTCATAGCTATTACTGGACCCAGGTGTTATTTTTTGGCAAGCAAAAGACGGCATACGAGATCCGTCACAACACCAACCAACTTCGCCGTCTTCGT	CLL-H-037595	KIAA1737	Homo sapiens KIAA1737 (KIAA1737), mRNA.		85457	NM_033426.2	32307174	NP_219494.2	14	14q24.3c	4.80728	11.4211	8.11421	4.6767	57.6359	47.4417	67.6657	57.5537	14.3005	24.8472	5.84675	8.33916	7.09295	1.7624	0.0433206	0		7.29139
25329	ACCACACATGCAACTGTG	CCACAAGTTTGACCTGATGTA	TAGAAGACGCACCGGCCACAAGTTTGACTTGATGTAGTTAATATTCATAGCTACATCAGGTCAAACTTGTGGTTTTTTGGCAAGCAAAAGACGGCATACGAGATCCCACAGTTGCATGTGTGGTTTCGCCGTCTTCGT	CLL-H-052803	TUBA1B	Homo sapiens tubulin, alpha 1b (TUBA1B), mRNA.	K-ALPHA-1	10376	NM_006082.2	57013275	NP_006073.2	12	12q13.12b	79.4481	86.7072	83.0776	5.13294	6.17849	582.215	582.415	582.315	0.141391	0.0242809	7.00809	7.0105	7.00929	0.00170192	5.28912e-05	0		7.18985
3790	TGACTGTGTGTGCAACGT	CTGAAATTATAGCTTCGCTAT	TAGAAGACGCACCGGCTGAAATTATAGCTTCGCTATGTTAATATTCATAGCATAGCGAAGCTATAATTTCAGTTTTTTGGCAAGCAAAAGACGGCATACGAGATCCACGTTGCACACACAGTCATTCGCCGTCTTCGT	CLL-H-031264	CNTN5	Homo sapiens contactin 5 (CNTN5), transcript variant 1, mRNA.	HNB-2s; MGC163491; NB-2	53942	NM_014361.2	28373127	NP_055176.1	11	11q22.1b-q22.1c	18.2236	22.1259	20.1747	2.75932	13.6771	229.815	48.114	138.965	128.482	92.4567	11.3912	2.38487	6.88806	6.36847	0.321215	0		7.04271
6049	CAGTTGCAACACCAACGT	CTGAGGTGTCAGCCTTCTAAT	TAGAAGACGCACCGGCTGAGGTGTTAGCTTTCTAATGTTAATATTCATAGCATTAGAAGGCTGACACCTCAGTTTTTTGGCAAGCAAAAGACGGCATACGAGATCCACGTTGGTGTTGCAACTGTTCGCCGTCTTCGT	CLL-H-033523	ESM1	Homo sapiens endothelial cell-specific molecule 1 (ESM1), mRNA.		11082	NM_001135604.1	13259505	NP_008967.1	5	5q11.2d	26.4533	12.9059	19.6796	9.57947	48.6772	26.9163	243.517	135.216	153.16	113.27	1.36773	12.3741	6.8709	7.78266	0.398526	0		7.02188
5630	CAGTACGTCAACACACCA	GCGAGCTTTGCACAGACCCTA	TAGAAGACGCACCGGGCGAGCTTTGCATAGACCTTAGTTAATATTCATAGCTAGGGTCTGTGCAAAGCTCGCTTTTTTGGCAAGCAAAAGACGGCATACGAGATCCTGGTGTGTTGACGTACTGTTCGCCGTCTTCGT	CLL-H-033104	EEPD1	Homo sapiens endonuclease/exonuclease/phosphatase family domain containing 1 (EEPD1), mRNA.		80820	NM_030636.2	71043965	NP_085139.2	7	7p14.2a	0.582167	6.57234	3.57726	4.2357	118.406	17.9522	31.1952	24.5737	9.36421	38.1066	5.01844	8.72044	6.86944	2.61771	0.10183	0		7.02011
17006	ACGTACGTCATGGTACAC	GCACGTTTGATGACTGCCAAA	TAGAAGACGCACCGGGCACGTTTGATGATTGCTAAAGTTAATATTCATAGCTTTGGCAGTCATCAAACGTGCTTTTTTGGCAAGCAAAAGACGGCATACGAGATCCGTGTACCATGACGTACGTTTCGCCGTCTTCGT	CLL-H-044480	PITRM1	Homo sapiens pitrilysin metallopeptidase 1 (PITRM1), mRNA.	MGC141929; KIAA1104; MP1; MGC138192; hMP1	10531	NM_014889.2	41352060	NP_055704.2	10	10p15.2b	10.6378	14.401	12.5194	2.66101	21.2551	134.642	36.3184	85.4801	69.5251	81.3349	10.7547	2.90097	6.82781	5.5534	0.276306	0		6.96959
6985	CATGTGGTACCAGTTGCA	CAGGCTGGATGTCTAGTTCCA	TAGAAGACGCACCGGCAGGCTGGATGTTTAGTTTCAGTTAATATTCATAGCTGGAACTAGACATCCAGCCTGTTTTTTGGCAAGCAAAAGACGGCATACGAGATCCTGCAACTGGTACCACATGTTCGCCGTCTTCGT	CLL-H-034459	FMO6P	Homo sapiens flavin containing monooxygenase 6 pseudogene (FMO6P), non-coding RNA.	FMO6; FLJ27001	388714	NR_002601.1	83281198		1	1q24.3a	0.62627	5.92861	3.27744	3.74932	114.398	35.1313	9.31484	22.2231	18.255	82.1443	10.7191	2.84211	6.78062	5.56989	0.287092	0		6.91231
27106	GTTGACGTACCACAACTG	AGCCTCAAAGAACTCCCAATT	TAGAAGACGCACCGGAGCCTCAAAGAACTCCTAATTGTTAATATTCATAGCAATTGGGAGTTCTTTGAGGCTTTTTTTGGCAAGCAAAAGACGGCATACGAGATCCCAGTTGTGGTACGTCAACTTCGCCGTCTTCGT	CLL-H-054580	ZNF543	Homo sapiens zinc finger protein 543 (ZNF543), mRNA.	MGC119384; DKFZp434H055; MGC119382	125919	NM_213598.2	47106062	NP_998763.1	19	19q13.43b	16.3095	18.0869	17.1982	1.25684	7.30797	140.803	87.4075	114.105	37.7564	33.0891	8.18708	5.08236	6.63472	2.19537	0.0682919	0		6.73523
14728	CATGCAGTGTTGGTTGGT	CCCAAGATGGCCTTCAACTAC	TAGAAGACGCACCGGCCCAAGATGGCTTTCAATTACGTTAATATTCATAGCGTAGTTGAAGGCCATCTTGGGTTTTTTGGCAAGCAAAAGACGGCATACGAGATCCACCAACCAACACTGCATGTTCGCCGTCTTCGT	CLL-H-042202	OR2M2	Homo sapiens olfactory receptor, family 2, subfamily M, member 2 (OR2M2), mRNA.	OST423; OR2M2Q	391194	NM_001004688.1	52317203	NP_001004688.1	1	1q44f	6.67727	14.2037	10.4405	5.32201	50.9747	128.154	9.28633	68.7203	84.0524	122.311	12.2747	0.889452	6.58209	8.0506	0.430967	0		6.67136
4089	TGGTCAACGTGTGTACCA	GCAGATGTTCTTTGGCATCAT	TAGAAGACGCACCGGGCAGATGTTCTTTGGTATCATGTTAATATTCATAGCATGATGCCAAAGAACATCTGCTTTTTTGGCAAGCAAAAGACGGCATACGAGATCCTGGTACACACGTTGACCATTCGCCGTCTTCGT	CLL-H-031563	CRELD1	Homo sapiens cysteine-rich with EGF-like domains 1 (CRELD1), transcript variant 2, mRNA.	AVSD2; CIRRIN; DKFZP566D213	78987	NM_001031717.2	116875822	NP_056328.2	3	3p25.3c	31.6928	25.8741	28.7834	4.11447	14.2946	29.2116	346.93	188.071	224.661	119.455	1.01488	12.0531	6.534	7.80522	0.421678	0		6.613
26396	CATGACGTTGCAGTACGT	CAACGTGTTTAATGTGGACAT	TAGAAGACGCACCGGCAACGTGTTTAATGTGGATATGTTAATATTCATAGCATGTCCACATTAAACACGTTGTTTTTTGGCAAGCAAAAGACGGCATACGAGATCCACGTACTGCAACGTCATGTTCGCCGTCTTCGT	CLL-H-053870	ZACN	Homo sapiens zinc activated ligand-gated ion channel (ZACN), mRNA.	ZAC; LGICZ; L2; MGC129841	353174	NM_180990.3	31340935	NP_851321.1	17	17q25.1d	7.5417	19.1979	13.3698	8.24217	61.6477	2.66988	170.31	86.4897	118.539	137.056	0.199695	12.7384	6.46904	8.86619	0.47592	0		6.53415
21695	CAGTACTGACCATGACTG	GCCTGGGCTTCATCTATTTAT	TAGAAGACGCACCGGGCCTGGGCTTCATTTATTTATGTTAATATTCATAGCATAAATAGATGAAGCCCAGGCTTTTTTGGCAAGCAAAAGACGGCATACGAGATCCCAGTCATGGTCAGTACTGTTCGCCGTCTTCGT	CLL-H-049169	SLC2A10	Homo sapiens solute carrier family 2 (facilitated glucose transporter), member 10 (SLC2A10), mRNA.	MGC126706; ATS; GLUT10	81031	NM_030777.3	39777591	NP_110404.1	20	20q13.12c	17.1475	17.329	17.2382	0.128357	0.744606	199.021	22.2796	110.65	124.975	112.946	11.5453	1.29245	6.41889	7.24988	0.40131	0		6.47329
10160	CAACTGCAGTTGCACAGT	GAAGTACATAAGACCTTATTT	TAGAAGACGCACCGGGAAGTACATAAGACCTTATTTGTTAATATTCATAGCAAATAAGGTCTTATGTACTTCTTTTTTGGCAAGCAAAAGACGGCATACGAGATCCACTGTGCAACTGCAGTTGTTCGCCGTCTTCGT	CLL-H-037634	KIF11	Homo sapiens kinesin family member 11 (KIF11), mRNA.	KNSL1; EG5; HKSP; TRIP5	3832	NM_004523.3	13699823	NP_004514.2	10	10q23.33a	41.9601	21.9597	31.9599	14.1424	44.2504	240.591	166.802	203.697	52.1768	25.6149	7.52791	5.21911	6.37351	1.63257	0.0461414	0		6.41821
8078	CAGTACCAGTGTACACCA	GCAGTGGCTCATACCTCGGAT	TAGAAGACGCACCGGGCAGTGGCTTATACCTTGGATGTTAATATTCATAGCATCCGAGGTATGAGCCACTGCTTTTTTGGCAAGCAAAAGACGGCATACGAGATCCTGGTGTACACTGGTACTGTTCGCCGTCTTCGT	CLL-H-035552	GPR31	Homo sapiens G protein-coupled receptor 31 (GPR31), mRNA.		2853	NM_005299.2	153792267	NP_005290.2	6	6q27c	0.105848	3.51979	1.81282	2.41402	133.164	4.95317	18.0309	11.492	9.24733	80.4674	2.73231	9.94633	6.33932	5.10108	0.288424	0		6.37671
21552	CAACCAACCACATGACCA	GCGGTACGTCAGGCATCGTGT	TAGAAGACGCACCGGGCGGTACGTTAGGCATTGTGTGTTAATATTCATAGCACACGATGCCTGACGTACCGCTTTTTTGGCAAGCAAAAGACGGCATACGAGATCCTGGTCATGTGGTTGGTTGTTCGCCGTCTTCGT	CLL-H-049026	SLC25A29	Homo sapiens solute carrier family 25, member 29 (SLC25A29), nuclear gene encoding mitochondrial protein, mRNA.	CACL; C14orf69; FLJ38975	123096	NM_001039355.1	86198309	NP_001034444.1	14	14q32.2b	26.9384	10.1233	18.5309	11.8901	64.1639	212.829	21.4622	117.146	135.317	115.512	11.4851	1.15819	6.32166	7.30226	0.412517	0		6.35528
15295	TGACCACACAACCACATG	GCAGCGAAGTAGAGAAATGTC	TAGAAGACGCACCGGGCAGTGAAGTAGAGAAATGTTGTTAATATTCATAGCGACATTTCTCTACTTCGCTGCTTTTTTGGCAAGCAAAAGACGGCATACGAGATCCCATGTGGTTGTGTGGTCATTCGCCGTCTTCGT	CLL-H-042769	OR56A1	Homo sapiens olfactory receptor, family 56, subfamily A, member 1 (OR56A1), mRNA.	OR11-75	120796	NM_001001917.2	50054465	NP_001001917.1	11	11p15.4c	20.7992	23.5898	22.1945	1.97326	8.89075	222.905	50.8895	136.897	121.633	88.8501	10.0432	2.29288	6.16806	5.48033	0.313972	0		6.16886
1965	GTCAGTACACTGACTGAC	GATGAAGAGTGACGAGGATAA	TAGAAGACGCACCGGGATGAAGAGTGATGAGGATAAGTTAATATTCATAGCTTATCCTCGTCACTCTTCATCTTTTTTGGCAAGCAAAAGACGGCATACGAGATCCGTCAGTCAGTGTACTGACTTCGCCGTCTTCGT	CLL-H-029439	C13ORF16	Homo sapiens chromosome 13 open reading frame 16 (C13orf16), mRNA.	MGC35169; bA474D23.1	121793	NM_152324.1	22748708	NP_689537.1	13	13q34b	20.1112	11.8157	15.9634	5.86582	36.7453	163.503	32.3168	97.9099	92.7627	94.7429	10.2423	2.02443	6.13338	5.81094	0.33868	0		6.12677
20000	TGGTGTGTACCATGTGCA	CGCGGTGCACATGCGGGTCAA	TAGAAGACGCACCGGCGCGGTGCATATGCGGGTTAAGTTAATATTCATAGCTTGACCCGCATGTGCACCGCGTTTTTTGGCAAGCAAAAGACGGCATACGAGATCCTGCACATGGTACACACCATTCGCCGTCTTCGT	CLL-H-047474	RPP25	Homo sapiens ribonuclease P/MRP 25kDa subunit (RPP25), mRNA.	FLJ20374	54913	NM_017793.2	93277073	NP_060263.2	15	15q24.1b	9.2	14.8059	12.003	3.964	33.0252	12.8783	133.849	73.3634	85.539	116.596	1.07292	11.1513	6.11211	7.12648	0.417533	0		6.10095
13129	GTACACTGACCACAACGT	GCCATTCTTGACCAGAAATTA	TAGAAGACGCACCGGGCCATTCTTGACTAGAAATTAGTTAATATTCATAGCTAATTTCTGGTCAAGAATGGCTTTTTTGGCAAGCAAAAGACGGCATACGAGATCCACGTTGTGGTCAGTGTACTTCGCCGTCTTCGT	CLL-H-040603	NDC80	Homo sapiens NDC80 homolog, kinetochore complex component (S. cerevisiae) (NDC80), mRNA.	HEC; hsNDC80; TID3; KNTC2; HEC1	10403	NM_006101.2	5174456	NP_006092.1	18	18p11.32a	37.8761	30.4425	34.1593	5.25635	15.3877	203.672	212.036	207.854	5.91436	2.84543	5.96242	6.20728	6.08485	0.17314	0.00103599	0		6.06786
5896	CATGACTGGTGTCAACAC	GCTGAGAATGTAGTATTGTTT	TAGAAGACGCACCGGGCTGAGAATGTAGTATTGTTTGTTAATATTCATAGCAAACAATACTACATTCTCAGCTTTTTTGGCAAGCAAAAGACGGCATACGAGATCCGTGTTGACACCAGTCATGTTCGCCGTCTTCGT	CLL-H-033370	EPB41	Homo sapiens erythrocyte membrane protein band 4.1 (elliptocytosis 1, RH-linked) (EPB41), transcript variant 1, mRNA.	HE; EL1; 4.1R	2035	NM_001166005.1	42716288	NP_976218.1	1	1p35.3a	4.33097	14.401	9.36599	7.1206	76.0261	87.1034	26.7849	56.9442	42.6516	74.9007	9.29997	2.85981	6.07989	4.55388	0.259975	0		6.06184
25421	CAGTGTACTGTGGTTGTG	CCTCCTACTAGGAGGCTTGTC	TAGAAGACGCACCGGCCTCCTATTAGGAGGCTTGTTGTTAATATTCATAGCGACAAGCCTCCTAGTAGGAGGTTTTTTGGCAAGCAAAAGACGGCATACGAGATCCCACAACCACAGTACACTGTTCGCCGTCTTCGT	CLL-H-052895	TUSC4	Homo sapiens tumor suppressor candidate 4 (TUSC4), mRNA.	NPR2L; NPRL2	10641	NM_006545.4	50592991	NP_006536.3	3	3p21.31b	2.87555	3.43672	3.15614	0.396809	12.5726	9.83386	28.4673	19.1506	13.1758	68.8012	3.11579	9.01967	6.06773	4.17467	0.228304	0		6.04709
22729	TGACGTTGCAGTGTACAC	CCAAGCCCTGTCTTTCCTTCT	TAGAAGACGCACCGGCCAAGCCTTGTCTTTCTTTCTGTTAATATTCATAGCAGAAGGAAAGACAGGGCTTGGTTTTTTGGCAAGCAAAAGACGGCATACGAGATCCGTGTACACTGCAACGTCATTCGCCGTCTTCGT	CLL-H-050203	SRCRB4D	Homo sapiens scavenger receptor cysteine rich domain containing, group B (4 domains) (SRCRB4D), mRNA.	SRCRB-S4D; S4D-SRCRB	136853	NM_080744.1	18152778	NP_542782.1	7	7q11.23f	35.0799	28.9785	32.0292	4.31435	13.47	61.806	326.143	193.975	186.915	96.3604	1.92967	10.1827	6.05617	5.83575	0.345278	0		6.03306
11459	GTACTGTGTGCACAACGT	CCGTTTGGAAACCTCTAAGAT	TAGAAGACGCACCGGCCGTTTGGAAACCTTTAAGATGTTAATATTCATAGCATCTTAGAGGTTTCCAAACGGTTTTTTGGCAAGCAAAAGACGGCATACGAGATCCACGTTGTGCACACAGTACTTCGCCGTCTTCGT	CLL-H-038933	MAGEE1	Homo sapiens melanoma antigen family E, 1 (MAGEE1), mRNA.	KIAA1587; HCA1; DAMAGE	57692	NM_020932.2	20143481	NP_065983.1	X	Xq13.3c	4.0487	10.902	7.47535	4.84601	64.8265	44.1557	45.9754	45.0656	1.2867	2.85518	5.90685	6.15027	6.02856	0.172126	0.00877863	0		5.99954
21102	CATGACTGCAACACTGCA	CGGTAGAGAAAGCAACAGAAT	TAGAAGACGCACCGGCGGTAGAGAAAGCAATAGAATGTTAATATTCATAGCATTCTGTTGCTTTCTCTACCGTTTTTTGGCAAGCAAAAGACGGCATACGAGATCCTGCAGTGTTGCAGTCATGTTCGCCGTCTTCGT	CLL-H-048576	SH3PXD2A	Homo sapiens SH3 and PX domains 2A (SH3PXD2A), mRNA.	SH3MD1; FISH	9644	NM_014631.2	55749543	NP_055446.2	10	10q24.33a	7.36529	6.27124	6.81827	0.773609	11.3461	43.3342	38.5425	40.9384	3.38824	8.27643	6.35561	5.65284	6.00422	0.496935	0.00514757	0		5.97001
13662	TGCAACACCAGTGTACGT	GCTGCCAGAATGGTGGGACTT	TAGAAGACGCACCGGGCTGCTAGAATGGTGGGATTTGTTAATATTCATAGCAAGTCCCACCATTCTGGCAGCTTTTTTGGCAAGCAAAAGACGGCATACGAGATCCACGTACACTGGTGTTGCATTCGCCGTCTTCGT	CLL-H-041136	NOTCH2NL	Homo sapiens Notch homolog 2 (Drosophila) N-terminal like (NOTCH2NL), mRNA.	N2N	388677	NM_203458.3	131889436	NP_982283.2	1	1q21.1b	1.17315	3.60285	2.388	1.71805	71.9453	5.67803	22.5172	14.0976	11.9071	84.4618	2.37773	9.42931	5.90352	4.98622	0.302512	0		5.84779
20356	CACAGTTGCAACGTACGT	CGTGAGATATTTGGGCTTTAT	TAGAAGACGCACCGGCGTGAGATGTTTGGGCTTTGTGTTAATATTCATAGCATAAAGCCCAAATATCTCACGTTTTTTGGCAAGCAAAAGACGGCATACGAGATCCACGTACGTTGCAACTGTGTTCGCCGTCTTCGT	CLL-H-047830	SAR1A	Homo sapiens SAR1 gene homolog A (S. cerevisiae) (SAR1A), mRNA.	masra2; SARA1; SAR1; Sara	56681	NM_001142648.1	21361614	NP_064535.1	10	10q22.1a	13.6192	18.8449	16.232	3.69513	22.7644	22.6396	168.76	95.6999	103.323	107.965	1.39475	10.3967	5.89575	6.36537	0.390588	0		5.83836
11708	CAGTGTGTACACTGTGTG	CAACACCGTAACCGTTTGTAT	TAGAAGACGCACCGGCAACACCGTAACTGTTTGTATGTTAATATTCATAGCATACAAACGGTTACGGTGTTGTTTTTTGGCAAGCAAAAGACGGCATACGAGATCCCACACAGTGTACACACTGTTCGCCGTCTTCGT	CLL-H-039182	MBNL2	Homo sapiens muscleblind-like 2 (Drosophila) (MBNL2), transcript variant 1, mRNA.	MGC120628; MBLL39; MGC120626; MBLL; RP11-128N14.1; DKFZp781H1296; PRO2032; MGC120625	10150	NM_144778.2	46411178	NP_659002.1	13	13q32.1c	0.352828	3.35366	1.85324	2.12191	114.497	5.36393	16.4816	10.9227	7.86136	71.9724	2.89434	8.89336	5.89385	4.24195	0.255896	0		5.83605
18743	GTTGCATGCAACGTACAC	CCTGTTTGAGACCCTCTTTGA	TAGAAGACGCACCGGCCTGTTTGAGACCTTCTTTGGGTTAATATTCATAGCTCAAAGAGGGTCTCAAACAGGTTTTTTGGCAAGCAAAAGACGGCATACGAGATCCGTGTACGTTGCATGCAACTTCGCCGTCTTCGT	CLL-H-046217	RAB20	Homo sapiens RAB20, member RAS oncogene family (RAB20), mRNA.	FLJ20429	55647	NM_017817.1	8923400	NP_060287.1	13	13q34a	5.47766	10.6528	8.06523	3.65938	45.3723	56.3091	38.5996	47.4544	12.5226	26.3886	6.98171	4.78592	5.88382	1.55266	0.0507152	0		5.82388
17346	CACATGACGTTGCAACTG	CCTGAGCTTGAAGCAAGAATT	TAGAAGACGCACCGGCCTGAGCTTGAAGTAAGAATTGTTAATATTCATAGCAATTCTTGCTTCAAGCTCAGGTTTTTTGGCAAGCAAAAGACGGCATACGAGATCCCAGTTGCAACGTCATGTGTTCGCCGTCTTCGT	CLL-H-044820	PMPCB	Homo sapiens peptidase (mitochondrial processing) beta (PMPCB), nuclear gene encoding mitochondrial protein, mRNA.	Beta-MPP; MPP11; MPPP52; MPPB	9512	NM_004279.2	94538353	NP_004270.2	7	7q22.1f	31.7634	28.5528	30.1581	2.27018	7.52761	46.137	307.485	176.811	184.801	104.519	1.52984	10.1958	5.8628	6.12774	0.378409	0		5.79837
9866	CACACATGCACATGACTG	GCGCCTGTACTCCACCGATAT	TAGAAGACGCACCGGGCGCCTGTATTCCACTGATATGTTAATATTCATAGCATATCGGTGGAGTACAGGCGCTTTTTTGGCAAGCAAAAGACGGCATACGAGATCCCAGTCATGTGCATGTGTGTTCGCCGTCTTCGT	CLL-H-037340	KCNQ4	Homo sapiens potassium voltage-gated channel, KQT-like subfamily, member 4 (KCNQ4), transcript variant 2, mRNA.	KV7.4; DFNA2	9132	NM_004700.2	26638654	NP_751895.1	1	1p34.2c	21.9018	31.7923	26.847	6.99362	26.0499	42.1986	271.727	156.963	162.301	103.401	1.57182	10.1213	5.84656	6.04541	0.374853	0		5.77866
5575	CAACTGGTGTACGTACCA	CCAGCAATGATAAGCATGTAA	TAGAAGACGCACCGGCCAGCAATGATAAGTATGTAAGTTAATATTCATAGCTTACATGCTTATCATTGCTGGTTTTTTGGCAAGCAAAAGACGGCATACGAGATCCTGGTACGTACACCAGTTGTTCGCCGTCTTCGT	CLL-H-033049	ECT2	Homo sapiens epithelial cell transforming sequence 2 oncogene (ECT2), mRNA.	FLJ10461; MGC138291	1894	NM_018098.4	21735571	NP_060568.3	3	3q26.31b	12.8518	41.6041	27.2279	20.331	74.6695	185.611	132.594	159.103	37.4888	23.5627	6.81694	4.86978	5.84336	1.37685	0.0485166	0		5.77477
13706	TGTGTGCACAGTTGTGTG	CCGTGGTTTCCAAGAAGCTTT	TAGAAGACGCACCGGCCGTGGTTTCTAAGAGGCTTTGTTAATATTCATAGCAAAGCTTCTTGGAAACCACGGTTTTTTGGCAAGCAAAAGACGGCATACGAGATCCCACACAACTGTGCACACATTCGCCGTCTTCGT	CLL-H-041180	NPFFR2	Homo sapiens neuropeptide FF receptor 2 (NPFFR2), transcript variant 1, mRNA.	NPFF2; NPGPR; GPR74	10886	NM_001144756.1	4758819	NP_004876.1	4	4q13.3c	3.27248	2.69954	2.98601	0.40513	13.5676	14.2917	20.5972	17.4445	4.45866	25.5591	4.78622	6.8979	5.84206	1.49318	0.0447475	0		5.7732
10340	GTCACACAACCAACTGCA	GAACCCAAAGTCGGTGGTATA	TAGAAGACGCACCGGGAACCTAAAGTTGGTGGTATAGTTAATATTCATAGCTATACCACCGACTTTGGGTTCTTTTTTGGCAAGCAAAAGACGGCATACGAGATCCTGCAGTTGGTTGTGTGACTTCGCCGTCTTCGT	CLL-H-037814	KLHL26	Homo sapiens kelch-like 26 (Drosophila) (KLHL26), mRNA.	FLJ11078	55295	NM_018316.1	8922853	NP_060786.1	19	19p13.11b	12.0226	23.0292	17.5259	7.7828	44.4074	162.694	39.9303	101.312	86.8068	85.6827	9.28305	2.27836	5.7807	4.95306	0.306964	0		5.69872
15562	TGCACACAGTCAGTACCA	CCAACCATCATGATTCCCAAA	TAGAAGACGCACCGGCCAACCATCATGATTCTCAAAGTTAATATTCATAGCTTTGGGAATCATGATGGTTGGTTTTTTGGCAAGCAAAAGACGGCATACGAGATCCTGGTACTGACTGTGTGCATTCGCCGTCTTCGT	CLL-H-043036	OR6K6	Homo sapiens olfactory receptor, family 6, subfamily K, member 6 (OR6K6), mRNA.	OR1-21	128371	NM_001005184.1	52353341	NP_001005184.1	1	1q23.1g	16.6976	22.5204	19.609	4.11734	20.9972	44.3007	181.991	113.146	97.3618	86.0498	2.2592	9.281	5.7701	4.96516	0.307522	0		5.68586
23793	GTCAACACGTGTTGACGT	CCTACCAAGATTTCCAAGAAT	TAGAAGACGCACCGGCCTACCAAGATTTCTAAGAATGTTAATATTCATAGCATTCTTGGAAATCTTGGTAGGTTTTTTGGCAAGCAAAAGACGGCATACGAGATCCACGTCAACACGTGTTGACTTCGCCGTCTTCGT	CLL-H-051267	TEX14	Homo sapiens testis expressed 14 (TEX14), transcript variant 1, mRNA.		56155	NM_031272.3	57863262	NP_938207.2	17	17q22d	4.60441	1.01752	2.81096	2.53631	90.2293	17.0462	14.9418	15.994	1.48803	9.30372	6.06417	5.31553	5.68985	0.529368	0.0239864	0		5.58846
18125	CAGTCAACGTGTACTGTG	GCTGGTCTCTTATCAAGAATA	TAGAAGACGCACCGGGCTGGTCTCTTATTAAGAATAGTTAATATTCATAGCTATTCTTGATAAGAGACCAGCTTTTTTGGCAAGCAAAAGACGGCATACGAGATCCCACAGTACACGTTGACTGTTCGCCGTCTTCGT	CLL-H-045599	PRR3	Homo sapiens proline rich 3 (PRR3), transcript variant 2, mRNA.	MGC161733; CAT56; MGC161735	80742	NM_001077497.2	117320542	NP_001070965.1	6	6p21.33b	6.89779	17.2978	12.0978	7.35394	60.7873	68.4263	67.0194	67.7228	0.994854	1.46901	5.65609	5.53979	5.59794	0.0822342	0.00878204	0		5.47691
17224	CAACGTACGTTGCACACA	CCGGATCAAGAAGAATGAATA	TAGAAGACGCACCGGCCGGATTAAGAAGAATGAATAGTTAATATTCATAGCTATTCATTCTTCTTGATCCGGTTTTTTGGCAAGCAAAAGACGGCATACGAGATCCTGTGTGCAACGTACGTTGTTCGCCGTCTTCGT	CLL-H-044698	PLK1	Homo sapiens polo-like kinase 1 (Drosophila) (PLK1), mRNA.	PLK; STPK13	5347	NM_005030.3	34147632	NP_005021.2	16	16p12.1c	8.59137	20.0389	14.3151	8.09463	56.5459	10.4258	147.564	78.995	96.9715	122.756	0.728308	10.3083	5.51829	6.77405	0.446442	0		5.38024
14149	TGACACACACACCAACGT	CCGATATTCATCAACTTTCTT	TAGAAGACGCACCGGCCGATATTCATCAACTTTCTTGTTAATATTCATAGCAAGAAAGTTGATGAATATCGGTTTTTTGGCAAGCAAAAGACGGCATACGAGATCCACGTTGGTGTGTGTGTCATTCGCCGTCTTCGT	CLL-H-041623	OMA1	Homo sapiens OMA1 homolog, zinc metallopeptidase (S. cerevisiae) (OMA1), mRNA.	DAB1; ZMPOMA1; 2010001O09Rik; YKR087C; FLJ33782; MPRP-1	115209	NM_145243.3	52851455	NP_660286.1	1	1p32.1f	37.5321	52.6307	45.0814	10.6763	23.6823	50.0512	446.523	248.287	280.348	112.913	1.11024	9.90482	5.50753	6.21871	0.413399	0		5.36718
25207	CACAGTGTACTGACACTG	ACGGCTCCATCATCAAGACTT	TAGAAGACGCACCGGACGGCTCCATTATCAAGATTTGTTAATATTCATAGCAAGTCTTGATGATGGAGCCGTTTTTTTGGCAAGCAAAAGACGGCATACGAGATCCCAGTGTCAGTACACTGTGTTCGCCGTCTTCGT	CLL-H-052681	TSSK2	Homo sapiens testis-specific serine kinase 2 (TSSK2), mRNA.	FLJ38613; SPOGA2; STK22B; DGS-G	23617	NM_053006.4	34222349	NP_443732.2	22	22q11.21b	18.3735	3.09409	10.7338	10.8042	100.656	48.4928	69.3196	58.9062	14.7267	25.0003	4.51776	6.45806	5.48791	1.372	0.0649552	0		5.34336
10134	GTACTGGTACGTTGTGCA	ATGAGCACTTTAGGCAATAAC	TAGAAGACGCACCGGATGAGCACTTTAGGTAATAACGTTAATATTCATAGCGTTATTGCCTAAAGTGCTCATTTTTTTGGCAAGCAAAAGACGGCATACGAGATCCTGCACAACGTACCAGTACTTCGCCGTCTTCGT	CLL-H-037608	KIAA2022	Homo sapiens KIAA2022 (KIAA2022), mRNA.	RP11-130N24.1; bA130N24.1	340533	NM_001008537.2	56711285	NP_001008537.1	X	Xq13.3a	8.32675	35.935	22.1309	19.522	88.2116	65.3577	175.984	120.671	78.2246	64.8247	2.95324	7.95196	5.4526	3.53463	0.226043	0		5.30051
2098	ACACCACAGTCAGTTGGT	GTGCTCCCTTTCTCTGTCAGT	TAGAAGACGCACCGGGTGCTCTCTTTCTCTGTTAGTGTTAATATTCATAGCACTGACAGAGAAAGGGAGCACTTTTTTGGCAAGCAAAAGACGGCATACGAGATCCACCAACTGACTGTGGTGTTTCGCCGTCTTCGT	CLL-H-029572	C15ORF2	Homo sapiens chromosome 15 open reading frame 2 (C15orf2), mRNA.		23742	NM_018958.2	112421133	NP_061831.2	15	15q11.2e	40.3812	58.2893	49.3353	12.663	25.6672	212.334	322.683	267.509	78.0287	29.1686	4.3039	6.54062	5.42226	1.5816	0.0598109	0		5.26369
16848	ACGTTGTGACGTACACGT	ACGAGACTATCGTGGACGAAA	TAGAAGACGCACCGGACGAGACTATTGTGGATGAAAGTTAATATTCATAGCTTTCGTCCACGATAGTCTCGTTTTTTTGGCAAGCAAAAGACGGCATACGAGATCCACGTGTACGTCACAACGTTTCGCCGTCTTCGT	CLL-H-044322	PHOSPHO1	Homo sapiens phosphatase, orphan 1 (PHOSPHO1), mRNA.		162466	NM_001143804.1	31341911	NP_848595.1	17	17q21.32c	6.20978	7.61063	6.9102	0.990552	14.3346	60.0301	14.4475	37.2388	32.2317	86.5542	8.68716	2.09075	5.38896	4.66437	0.314893	0		5.22327
14825	ACGTCAACTGGTGTTGCA	CCTGAGCCAACTTTCCCTCAT	TAGAAGACGCACCGGCCTGAGCTAACTTTCCCTTATGTTAATATTCATAGCATGAGGGAAAGTTGGCTCAGGTTTTTTGGCAAGCAAAAGACGGCATACGAGATCCTGCAACACCAGTTGACGTTTCGCCGTCTTCGT	CLL-H-042299	OR2T8	Homo sapiens olfactory receptor, family 2, subfamily T, member 8 (OR2T8), mRNA.	OR2T8P	343172	NM_001005522.1	53850669	NP_001005522.1	1	1q44e	6.7302	9.48992	8.11006	1.95142	24.0617	64.9711	21.6523	43.3117	30.6311	70.7224	8.01118	2.6698	5.34049	3.77692	0.246276	0		5.16444
5	GTACCAGTCATGCACACA	CCAGGGATTTCAGTCGATGTA	TAGAAGACGCACCGGCCAGGGATTTCAGTTGATGTGGTTAATATTCATAGCTACATCGACTGAAATCCCTGGTTTTTTGGCAAGCAAAAGACGGCATACGAGATCCTGTGTGCATGACTGGTACTTCGCCGTCTTCGT	CLL-H-000005-H-M2	Luc	Luciferase as negative control	NA	NA	Luc	NA	NA	NA	NA	39.4815	41.521	40.5012	1.44217	3.5608	396.93	34.4839	215.707	256.288	118.813	9.80045	0.851429	5.32594	6.32791	0.43565	0		5.14679
18801	GTACCAGTGTACGTACGT	CAGGTGGACCAATTCTGCAAA	TAGAAGACGCACCGGCAGGTGGACTAATTCTGTAAAGTTAATATTCATAGCTTTGCAGAATTGGTCCACCTGTTTTTTGGCAAGCAAAAGACGGCATACGAGATCCACGTACGTACACTGGTACTTCGCCGTCTTCGT	CLL-H-046275	RAB32	Homo sapiens RAB32, member RAS oncogene family (RAB32), mRNA.		10981	NM_006834.3	20127508	NP_006825.1	6	6q24.3b	32.5484	32.1972	32.3728	0.248327	0.767086	61.8905	279.94	170.915	154.184	90.2109	1.91181	8.64737	5.27959	4.76276	0.331631	0		5.09053
17281	CAACGTCAGTGTACTGGT	GAAATCTTAGCTGTGAGAGAT	TAGAAGACGCACCGGGAAATCTTAGTTGTGAGAGATGTTAATATTCATAGCATCTCTCACAGCTAAGATTTCTTTTTTGGCAAGCAAAAGACGGCATACGAGATCCACCAGTACACTGACGTTGTTCGCCGTCTTCGT	CLL-H-044755	PLUNC	Homo sapiens palate, lung and nasal epithelium carcinoma associated (PLUNC), transcript variant 2, mRNA.	SPLUNC1; SPURT; NASG; bA49G10.5; LUNX	51297	NM_016583.3	18765704	NP_570913.1	20	20q11.21c	12.4637	11.2758	11.8697	0.83996	7.0765	11.9239	113.289	62.6066	71.6763	114.487	1.00456	9.54441	5.27448	6.03858	0.422265	0		5.08434
14219	GTTGTGTGGTCAACACAC	GCTGGAAATGAAACTGACAAA	TAGAAGACGCACCGGGCTGGAAATGAAACTGATAAAGTTAATATTCATAGCTTTGTCAGTTTCATTTCCAGCTTTTTTGGCAAGCAAAAGACGGCATACGAGATCCGTGTGTTGACCACACAACTTCGCCGTCTTCGT	CLL-H-041693	OPN5	Homo sapiens opsin 5 (OPN5), transcript variant 1, mRNA.	PGR12; TMEM13; GPR136	221391	NM_001030051.1	71999144	NP_859528.1	6	6p12.3d	11.2111	5.23296	8.22204	4.2272	51.413	29.6707	56.3833	43.027	18.8887	43.8995	3.60868	6.85759	5.23313	2.29732	0.126054	0		5.03415
8118	CACACACAGTGTACACTG	TGGTGGTCTTTGCTGTCCTTT	TAGAAGACGCACCGGTGGTGGTCTTTGTTGTTCTTTGTTAATATTCATAGCAAAGGACAGCAAAGACCACCATTTTTTGGCAAGCAAAAGACGGCATACGAGATCCCAGTGTACACTGTGTGTGTTCGCCGTCTTCGT	CLL-H-035592	GPR61	Homo sapiens G protein-coupled receptor 61 (GPR61), mRNA.	GPCR3; BALGR	83873	NM_031936.4	149773489	NP_114142.3	1	1p13.3b	21.0727	19.8001	20.4364	0.899844	4.40315	198.139	15.2174	106.678	129.345	121.248	9.69541	0.744624	5.22002	6.32916	0.445257	0		5.01823
24215	CATGTGGTGTCATGTGCA	CCGCATGATGCTGTACAGTAC	TAGAAGACGCACCGGCCGCATGATGTTGTACAGTATGTTAATATTCATAGCGTACTGTACAGCATCATGCGGTTTTTTGGCAAGCAAAAGACGGCATACGAGATCCTGCACATGACACCACATGTTCGCCGTCTTCGT	CLL-H-051689	TMEM90B	Homo sapiens transmembrane protein 90B (TMEM90B), mRNA.	FLJ14220	79953	NM_024893.1	13376346	NP_079169.1	20	20p11.21b-p11.21a	4.12809	3.15639	3.64224	0.687099	18.8647	24.8142	13.0978	18.956	8.28473	43.7051	6.8129	3.59609	5.20449	2.27463	0.121146	0		4.99939
22623	ACCAGTCAACGTGTACCA	GCTTTCGAGACGATGATTATT	TAGAAGACGCACCGGGCTTTCGAGATGATGATTATTGTTAATATTCATAGCAATAATCATCGTCTCGAAAGCTTTTTTGGCAAGCAAAAGACGGCATACGAGATCCTGGTACACGTTGACTGGTTTCGCCGTCTTCGT	CLL-H-050097	SPOCK1	Homo sapiens sparc/osteonectin, cwcv and kazal-like domains proteoglycan (testican) 1 (SPOCK1), mRNA.	SPOCK; TESTICAN; TIC1; FLJ37170	6695	NM_004598.3	82659117	NP_004589.1	5	5q31.2b	28.2174	25.8637	27.0406	1.66436	6.15505	9.07277	271.528	140.3	185.584	132.276	0.335524	10.0415	5.18851	6.86316	0.479076	0		4.97999
11501	ACGTCAGTACTGGTACCA	GCAGAAATTCAGACAGAGAAA	TAGAAGACGCACCGGGCAGAAATTCAGATAGAGAAAGTTAATATTCATAGCTTTCTCTGTCTGAATTTCTGCTTTTTTGGCAAGCAAAAGACGGCATACGAGATCCTGGTACCAGTACTGACGTTTCGCCGTCTTCGT	CLL-H-038975	MAN1A2	Homo sapiens mannosidase, alpha, class 1A, member 2 (MAN1A2), mRNA.	MAN1B	10905	NM_006699.3	46852167	NP_006690.1	1	1p12c	10.1967	18.4503	14.3235	5.83617	40.7453	129.689	18.6487	74.1686	78.5171	105.863	9.05423	1.30196	5.1781	5.48168	0.394868	0		4.96735
13776	CAGTACTGTGTGTGACAC	GCTCCTTTGTGATATGTTCAA	TAGAAGACGCACCGGGCTCCTTTGTGATATGTTTAAGTTAATATTCATAGCTTGAACATATCACAAAGGAGCTTTTTTGGCAAGCAAAAGACGGCATACGAGATCCGTGTCACACACAGTACTGTTCGCCGTCTTCGT	CLL-H-041250	NR2E3	Homo sapiens nuclear receptor subfamily 2, group E, member 3 (NR2E3), transcript variant 1, mRNA.	rd7; ESCS; PNR; RNR; MGC49976	10002	NM_014249.2	30581148	NP_057430.1	15	15q23b	3.4489	0.0207657	1.73483	2.42405	139.729	15.0287	2.86099	8.94482	8.60384	96.1879	8.66289	1.64915	5.15602	4.95947	0.37218	0		4.94055
9996	CAGTGTCACAACTGTGAC	CCATCAGGTCTTATCTCACTT	TAGAAGACGCACCGGCCATCAGGTCTTATCTTACTTGTTAATATTCATAGCAAGTGAGATAAGACCTGATGGTTTTTTGGCAAGCAAAAGACGGCATACGAGATCCGTCACAGTTGTGACACTGTTCGCCGTCTTCGT	CLL-H-037470	KIAA0319	Homo sapiens KIAA0319 (KIAA0319), transcript variant 1, mRNA.	DLX2; DYLX2; MGC176717; DYX2	9856	NM_001168374.1	134304839	NP_055624.2	6	6p22.2b	0.0264621	4.81764	2.42205	3.38788	139.876	15.5361	9.36237	12.4492	4.36545	35.0661	6.41442	3.86547	5.13994	1.80238	0.124186	0		4.92104
7298	GTGTACACGTGTACACGT	CGCCACTTATGCGCTTCGCAT	TAGAAGACGCACCGGCGCCACTTATGTGCTTCGTATGTTAATATTCATAGCATGCGAAGCGCATAAGTGGCGTTTTTTGGCAAGCAAAAGACGGCATACGAGATCCACGTGTACACGTGTACACTTCGCCGTCTTCGT	CLL-H-034772	GALR2	Homo sapiens galanin receptor 2 (GALR2), mRNA.	MGC125983; MGC125984; GALNR2	8811	NM_003857.2	8051600	NP_003848.1	17	17q25.1d	0.105848	2.0558	1.08083	1.37883	127.572	7.82843	3.22218	5.5253	3.25711	58.9491	7.24301	2.98121	5.11211	3.01354	0.217533	0		4.88726
6849	GTTGTGACGTACCAACCA	GAAGTGGAATTAGTGGATATT	TAGAAGACGCACCGGGAAGTGGAATTAGTGGATATTGTTAATATTCATAGCAATATCCACTAATTCCACTTCTTTTTTGGCAAGCAAAAGACGGCATACGAGATCCTGGTTGGTACGTCACAACTTCGCCGTCTTCGT	CLL-H-034323	FKBP3	Homo sapiens FK506 binding protein 3, 25kDa (FKBP3), mRNA.	PPIase; FKBP-25	2287	NM_002013.3	17149845	NP_002004.1	14	14q21.3b	15.4274	20.2777	17.8526	3.42967	19.2111	158.526	23.7814	91.1536	95.2787	104.525	8.87972	1.3321	5.10591	5.33697	0.390486	0		4.87974
18704	TGTGGTACCAGTGTACGT	GAGGCAGTACATGGACAAGAT	TAGAAGACGCACCGGGAGGCAGTATATGGATAAGATGTTAATATTCATAGCATCTTGTCCATGTACTGCCTCTTTTTTGGCAAGCAAAAGACGGCATACGAGATCCACGTACACTGGTACCACATTCGCCGTCTTCGT	CLL-H-046178	RAB11FIP4	Homo sapiens RAB11 family interacting protein 4 (class II) (RAB11FIP4), mRNA.	FLJ00131; KIAA1821; MGC126566; MGC11316; RAB11-FIP4	84440	NM_032932.3	54111426	NP_116321.2	17	17q11.2d	19.3438	47.7403	33.5421	20.0794	59.8633	271.929	69.3956	170.662	143.213	83.9159	8.10711	2.06891	5.08801	4.26965	0.311944	0		4.85801
25630	GTGTCATGTGTGGTTGAC	GCCTCAGCTTGAAGATGATGC	TAGAAGACGCACCGGGCCTCAGTTTGAAGATGATGTGTTAATATTCATAGCGCATCATCTTCAAGCTGAGGCTTTTTTGGCAAGCAAAAGACGGCATACGAGATCCGTCAACCACACATGACACTTCGCCGTCTTCGT	CLL-H-053104	UCRC	Homo sapiens ubiquinol-cytochrome c reductase complex (7.2 kD) (UCRC), transcript variant 2, mRNA.	HSPC151; HSPC051; HSPC119	29796	NM_001003684.1	51173875	NP_001003684.1	22	22q12.2a	24.5833	18.2427	21.413	4.48351	20.9383	128.166	89.4415	108.804	27.3826	25.1669	5.98545	4.17698	5.08121	1.27879	0.0468886	0		4.84976
7230	ACGTGTCAGTGTACACCA	CCATCAGACAATGCGGTGAAT	TAGAAGACGCACCGGCCATTAGACAATGTGGTGAATGTTAATATTCATAGCATTCACCGCATTGTCTGATGGTTTTTTGGCAAGCAAAAGACGGCATACGAGATCCTGGTGTACACTGACACGTTTCGCCGTCTTCGT	CLL-H-034704	GABBR2	Homo sapiens gamma-aminobutyric acid (GABA) B receptor, 2 (GABBR2), mRNA.	HRIHFB2099; HG20; GPR51; FLJ36928; GPRC3B; GABABR2	9568	NM_005458.7	40255244	NP_005449.5	9	9q22.33b-q22.33c	9.88801	1.85853	5.87327	5.6777	96.6702	12.5762	46.7358	29.656	24.1545	81.4488	2.14127	7.95737	5.04932	4.11261	0.308037	0		4.81105
3926	GTGTACCAACACGTACTG	GACCGCTAAAGGAGGCGATAT	TAGAAGACGCACCGGGACCGTTAAAGGAGGTGATATGTTAATATTCATAGCATATCGCCTCCTTTAGCGGTCTTTTTTGGCAAGCAAAAGACGGCATACGAGATCCCAGTACGTGTTGGTACACTTCGCCGTCTTCGT	CLL-H-031400	COX6B1	Homo sapiens cytochrome c oxidase subunit Vib polypeptide 1 (ubiquitous) (COX6B1), nuclear gene encoding mitochondrial protein, mRNA.	COXG; COX6B	1340	NM_001863.4	17999530	NP_001854.1	19	19q13.12a	21.5049	22.2297	21.8673	0.512511	2.34374	16.3576	203.434	109.896	132.283	120.371	0.748038	9.30314	5.02559	6.04937	0.446001	0		4.78225
25116	CAGTCACACATGACTGTG	GTCCATTAATAAGAAGGCCAA	TAGAAGACGCACCGGGTCCATTAATAAGAAGGTCAAGTTAATATTCATAGCTTGGCCTTCTTATTAATGGACTTTTTTGGCAAGCAAAAGACGGCATACGAGATCCCACAGTCATGTGTGACTGTTCGCCGTCTTCGT	CLL-H-052590	TSEN54	Homo sapiens tRNA splicing endonuclease 54 homolog (S. cerevisiae) (TSEN54), mRNA.	FLJ37147; SEN54L; sen54	283989	NM_207346.2	108389175	NP_997229.2	17	17q25.1c	6.64199	13.4666	10.0543	4.8257	47.9965	88.1786	12.8602	50.5194	53.2581	105.421	8.77026	1.27908	5.02467	5.29707	0.39659	0		4.78113
18687	TGGTACCAACGTTGACGT	GCTTCATGAATTGGCCTCATA	TAGAAGACGCACCGGGCTTCATGAATTGGCCTTATAGTTAATATTCATAGCTATGAGGCCAATTCATGAAGCTTTTTTGGCAAGCAAAAGACGGCATACGAGATCCACGTCAACGTTGGTACCATTCGCCGTCTTCGT	CLL-H-046161	QTRT1	Homo sapiens queuine tRNA-ribosyltransferase 1 (QTRT1), mRNA.	FP3235; TGT	81890	NM_031209.2	13654275	NP_112486.1	19	19p13.2b	6.20978	8.99155	7.60066	1.96701	25.8794	28.6076	47.6768	38.1422	13.484	35.3518	3.76383	6.27272	5.01827	1.77405	0.0867737	0		4.77337
14300	GTACACCACAGTACACTG	GATGTTCTTCTCCTTCAGCTT	TAGAAGACGCACCGGGATGTTCTTCTCCTTTAGCTTGTTAATATTCATAGCAAGCTGAAGGAGAAGAACATCTTTTTTGGCAAGCAAAAGACGGCATACGAGATCCCAGTGTACTGTGGTGTACTTCGCCGTCTTCGT	CLL-H-041774	OR10H1	Homo sapiens olfactory receptor, family 10, subfamily H, member 1 (OR10H1), mRNA.		26539	NM_013940.2	7363438	NP_039228.1	19	19p13.12a	31.34	29.8092	30.5746	1.08244	3.54034	282.222	24.2566	153.239	182.409	119.035	9.23062	0.793359	5.01199	5.96604	0.441977	0		4.76575
10477	CATGGTCAACCACAACCA	GCCTCTTTGCATTGCCCATTT	TAGAAGACGCACCGGGCCTCTTTGTATTGCCTATTTGTTAATATTCATAGCAAATGGGCAATGCAAAGAGGCTTTTTTGGCAAGCAAAAGACGGCATACGAGATCCTGGTTGTGGTTGACCATGTTCGCCGTCTTCGT	CLL-H-037951	KRT2	Homo sapiens keratin 2 (KRT2), mRNA.	MGC116967; KRT2E; MGC116968; KRTE; KRT2A	3849	NM_000423.2	47132619	NP_000414.2	12	12q13.13d	10.3732	7.1434	8.75828	2.28378	26.0757	43.8658	42.9623	43.4141	0.638837	1.4715	5.0085	4.90534	4.95692	0.0729409	0.00233304	0		4.69891
8165	ACGTACACGTTGACACGT	CAACTTGAATGACAAGGCTTT	TAGAAGACGCACCGGCAACTTGAATGATAAGGCTTTGTTAATATTCATAGCAAAGCCTTGTCATTCAAGTTGTTTTTTGGCAAGCAAAAGACGGCATACGAGATCCACGTGTCAACGTGTACGTTTCGCCGTCTTCGT	CLL-H-035639	GPR97	Homo sapiens G protein-coupled receptor 97 (GPR97), mRNA.	GPR-97; PGR26; Pb99	222487	NM_170776.4	40538803	NP_740746.3	16	16q13d	14.757	3.70668	9.23186	7.81379	84.6394	8.74658	82.3793	45.563	52.0662	114.273	0.947434	8.92337	4.9354	5.63984	0.432042	0		4.6728
8170	CAGTACACGTCAACACGT	GCCAAGAGATAGCAATGAATT	TAGAAGACGCACCGGGCCAAGAGATAGTAATGAATTGTTAATATTCATAGCAATTCATTGCTATCTCTTGGCTTTTTTGGCAAGCAAAAGACGGCATACGAGATCCACGTGTTGACGTGTACTGTTCGCCGTCTTCGT	CLL-H-035644	GPR98	Homo sapiens G protein-coupled receptor 98 (GPR98), transcript variant 1, mRNA.	FEB4; USH2B; USH2C; KIAA0686; MASS1; DKFZp761P0710; VLGR1b; VLGR1	84059	NM_032119.3	113722119	NP_115495.3	5	5q14.3h	0.141131	5.93899	3.04006	4.09971	134.856	3.37057	26.5473	14.9589	16.3884	109.556	1.10872	8.73249	4.92061	5.39082	0.423507	0		4.65484
10026	CACAACACACGTACTGGT	CAAATCATTACCAACGCGAAA	TAGAAGACGCACCGGCAAATCATTACCAACGTGAAAGTTAATATTCATAGCTTTCGCGTTGGTAATGATTTGTTTTTTGGCAAGCAAAAGACGGCATACGAGATCCACCAGTACGTGTGTTGTGTTCGCCGTCTTCGT	CLL-H-037500	KIAA0556	Homo sapiens KIAA0556 (KIAA0556), mRNA.		23247	NM_015202.2	54792777	NP_056017.1	16	16p12.1a-p11.2e	12.5783	19.7066	16.1425	5.04048	31.225	126.233	32.5924	79.413	66.2142	83.3796	7.81995	2.01905	4.9195	4.10186	0.310191	0		4.65349
24262	CATGTGTGTGGTTGTGGT	AGCTTACAATGACGCCATAAC	TAGAAGACGCACCGGAGCTTACAATGACGCTATAACGTTAATATTCATAGCGTTATGGCGTCATTGTAAGCTTTTTTTGGCAAGCAAAAGACGGCATACGAGATCCACCACAACCACACACATGTTCGCCGTCTTCGT	CLL-H-051736	TMPRSS11E2	Homo sapiens transmembrane protease, serine 11E2 (TMPRSS11E2), mRNA.		729884	NM_001099662.1	153791780	NP_001093132.1	4	4q13.2c	0.0264621	8.20245	4.11446	5.7813	140.512	27.6774	12.6511	20.1642	10.6252	52.6933	6.72686	3.07479	4.90082	2.5824	0.201408	0		4.63083
23234	GTCAACTGTGACTGACTG	CGTAGGTTAATGAGTGGTAAA	TAGAAGACGCACCGGCGTAGGTTAATGGGTGGTGAAGTTAATATTCATAGCTTTACCACTCATTAACCTACGTTTTTTGGCAAGCAAAAGACGGCATACGAGATCCCAGTCAGTCACAGTTGACTTCGCCGTCTTCGT	CLL-H-050708	SYNCRIP	Homo sapiens synaptotagmin binding, cytoplasmic RNA interacting protein (SYNCRIP), mRNA.	dJ3J17.2; pp68; RP1-3J17.2; HNRPQ1; hnRNP-Q; NSAP1; GRY-RBP	10492	NM_001159673.1	23397426	NP_006363.3	6	6q14.3c	21.8224	21.804	21.8132	0.0130405	0.0597825	173.76	39.2459	106.503	95.1157	89.3081	7.96581	1.79918	4.88249	4.36046	0.335012	0		4.60858
24626	GTTGGTCAGTTGCAACTG	CGTGAACTTGATCCCAGAATA	TAGAAGACGCACCGGCGTGAACTTGATCCTAGAATAGTTAATATTCATAGCTATTCTGGGATCAAGTTCACGTTTTTTGGCAAGCAAAAGACGGCATACGAGATCCCAGTTGCAACTGACCAACTTCGCCGTCTTCGT	CLL-H-052100	TPX2	Homo sapiens TPX2, microtubule-associated, homolog (Xenopus laevis) (TPX2), mRNA.	GD:C20orf1; HCTP4; C20orf1; FLS353; DIL-2; HCA519; DIL2; p100; REPP86; C20orf2	22974	NM_012112.4	40354199	NP_036244.2	20	20q11.21b	9.97622	11.8572	10.9167	1.33007	12.1837	50.909	54.8055	52.8572	2.75527	5.21266	4.6634	5.02033	4.84186	0.25239	0.00265018	0		4.55927
8414	GTTGCATGACTGCAACGT	CCGTATTCATCGACACCTAAA	TAGAAGACGCACCGGCCGTATTCATCGACACTTAAAGTTAATATTCATAGCTTTAGGTGTCGATGAATACGGTTTTTTGGCAAGCAAAAGACGGCATACGAGATCCACGTTGCAGTCATGCAACTTCGCCGTCTTCGT	CLL-H-035888	H2AFZ	Homo sapiens H2A histone family, member Z (H2AFZ), mRNA.	H2A/z; H2AZ; H2A.z; MGC117173	3015	NM_002106.3	53759146	NP_002097.1	4	4q23b	15.4627	23.0395	19.2511	5.35764	27.8303	29.0546	156.451	92.753	90.0831	97.1215	1.50924	8.12687	4.81806	4.67937	0.368476	0		4.53037
5095	GTCATGGTACACACACGT	CCTGGTCATGGAGTATTACGT	TAGAAGACGCACCGGCCTGGTTATGGAGTATTATGTGTTAATATTCATAGCACGTAATACTCCATGACCAGGTTTTTTGGCAAGCAAAAGACGGCATACGAGATCCACGTGTGTGTACCATGACTTCGCCGTCTTCGT	CLL-H-032569	DMPK	Homo sapiens dystrophia myotonica-protein kinase (DMPK), transcript variant 4, mRNA.	MDPK; MT-PK; DM1; DM; DMK; DM1PK	1760	NM_001081560.1	126091039	NP_001075031.1	19	19q13.32a	11.908	52.4022	32.1551	28.6338	89.049	22.2893	287.439	154.864	187.489	121.067	0.69318	8.93914	4.81616	5.83078	0.456793	0		4.52807
4949	ACTGCATGTGTGTGTGTG	CTATCAAGGATCTAACCTAAA	TAGAAGACGCACCGGCTATCAAGGATCTAACCTAAAGTTAATATTCATAGCTTTAGGTTAGATCCTTGATAGTTTTTTGGCAAGCAAAAGACGGCATACGAGATCCCACACACACACATGCAGTTTCGCCGTCTTCGT	CLL-H-032423	DHX32	Homo sapiens DEAH (Asp-Glu-Ala-His) box polypeptide 32 (DHX32), mRNA.	FLJ10694; DDX32; FLJ10889; DHLP1	55760	NM_018180.2	20336299	NP_060650.2	10	10q26.2a	33.2893	31.5846	32.437	1.20542	3.71618	269.803	42.4681	156.136	160.75	102.955	8.31776	1.30925	4.8135	4.95576	0.390162	0		4.52485
23912	CAACGTCAACGTACTGCA	GCCAGTAACCACAAATTCTTA	TAGAAGACGCACCGGGCCAGTAACCATAAATTCTTAGTTAATATTCATAGCTAAGAATTTGTGGTTACTGGCTTTTTTGGCAAGCAAAAGACGGCATACGAGATCCTGCAGTACGTTGACGTTGTTCGCCGTCTTCGT	CLL-H-051386	THUMPD2	Homo sapiens THUMP domain containing 2 (THUMPD2), mRNA.	C2orf8; MGC2454	80745	NM_025264.4	142367052	NP_079540.1	2	2p22.1b	18.7264	28.449	23.5877	6.87495	29.1464	201.836	24.1426	112.989	125.648	111.204	8.55683	1.02352	4.79018	5.32685	0.420829	0		4.49654
13489	CAACACACTGACTGACGT	CCGCCTACCAGCACTTAGCAT	TAGAAGACGCACCGGCCGCCTACCAGTACTTAGTATGTTAATATTCATAGCATGCTAAGTGCTGGTAGGCGGTTTTTTGGCAAGCAAAAGACGGCATACGAGATCCACGTCAGTCAGTGTGTTGTTCGCCGTCTTCGT	CLL-H-040963	NKX2-8	Homo sapiens NK2 homeobox 8 (NKX2-8), mRNA.	NKX2H; NKX2.8; Nkx2-9	26257	NM_014360.2	31377776	NP_055175.2	14	14q13.3a	31.7634	52.3088	42.0361	14.5278	34.5604	182.18	219.517	200.848	26.4009	13.1447	4.3339	5.2221	4.778	0.628053	0.0175299	0		4.48176
5822	ACGTGTACTGACACACTG	GCGTTACCAGTTATTACCCAA	TAGAAGACGCACCGGGCGTTACCAGTTATTATCCAAGTTAATATTCATAGCTTGGGTAATAACTGGTAACGCTTTTTTGGCAAGCAAAAGACGGCATACGAGATCCCAGTGTGTCAGTACACGTTTCGCCGTCTTCGT	CLL-H-033296	ELP4	Homo sapiens elongation protein 4 homolog (S. cerevisiae) (ELP4), mRNA.	C11orf19; PAX6NEB; FLJ20498; dJ68P15A.1; PAXNEB	26610	NM_019040.3	91208434	NP_061913.3	11	11p13f	9.74688	19.3329	14.5399	6.77832	46.6188	122.053	16.7382	69.3958	74.4691	107.311	8.3944	1.15119	4.77279	5.12172	0.4085	0		4.47544
21048	CAGTACTGTGTGGTACCA	CCTCTTATATATGGACTGATT	TAGAAGACGCACCGGCCTCTTATATATGGACTGATTGTTAATATTCATAGCAATCAGTCCATATATAAGAGGTTTTTTGGCAAGCAAAAGACGGCATACGAGATCCTGGTACCACACAGTACTGTTCGCCGTCTTCGT	CLL-H-048522	SGPP1	Homo sapiens sphingosine-1-phosphate phosphatase 1 (SGPP1), mRNA.	SPPase1	81537	NM_030791.2	40254975	NP_110418.1	14	14q23.2b	26.8326	9.90524	18.3689	11.9694	65.1614	161.449	13.2594	87.3544	104.786	119.955	8.78927	0.721839	4.75555	5.70453	0.452607	0		4.45451
1410	GTGTCATGTGACCAACCA	GCCCTAATAGATATTTCACAA	TAGAAGACGCACCGGGCCCTAATAGATATTTCACAAGTTAATATTCATAGCTTGTGAAATATCTATTAGGGCTTTTTTGGCAAGCAAAAGACGGCATACGAGATCCTGGTTGGTCACATGACACTTCGCCGTCTTCGT	CLL-H-028884	ATRNL1	Homo sapiens attractin-like 1 (ATRNL1), mRNA.	bA338L11.1; bA454H24.1; KIAA0534; FLJ45344; ALP	26033	NM_207303.2	109715850	NP_997186.1	10	10q25.3a-q25.3b	10.726	27.5665	19.1462	11.908	62.1952	145.732	35.1968	90.4644	78.1602	86.3988	7.61153	1.83832	4.72492	4.08228	0.330194	0		4.41734
26568	ACACGTCATGACTGACAC	CGCTATTTGCAGCACCACATT	TAGAAGACGCACCGGCGCTATTTGTAGCACCATATTGTTAATATTCATAGCAATGTGGTGCTGCAAATAGCGTTTTTTGGCAAGCAAAAGACGGCATACGAGATCCGTGTCAGTCATGACGTGTTTCGCCGTCTTCGT	CLL-H-054042	ZFP91	Homo sapiens zinc finger protein 91 homolog (mouse) (ZFP91), mRNA.	PZF; FKSG11; ZNF757	80829	NM_053023.3	153285405	NP_444251.1	11	11q12.1c	29.9463	18.5542	24.2502	8.05546	33.2181	90.631	137.527	114.079	33.1605	29.068	3.73733	5.67116	4.70425	1.36743	0.0651817	0		4.39224
5328	ACGTGTGTTGGTCAACTG	CGAGGGTAATACAAGTGAAAT	TAGAAGACGCACCGGCGAGGGTAATATAAGTGAAATGTTAATATTCATAGCATTTCACTTGTATTACCCTCGTTTTTTGGCAAGCAAAAGACGGCATACGAGATCCCAGTTGACCAACACACGTTTCGCCGTCTTCGT	CLL-H-032802	DSPP	Homo sapiens dentin sialophosphoprotein (DSPP), mRNA.	DTDP2; DMP3; DGI1; DPP; DSP; DFNA39	1834	NM_014208.3	111119006	NP_055023.2	4	4q22.1a	8.18562	3.11485	5.65024	3.58557	63.4588	31.2775	21.3766	26.3271	7.00097	26.5923	5.53561	3.78331	4.65946	1.23906	0.0653448	0		4.33789
876	TGTGGTGTACCATGTGGT	CCATCAGGATTCAAACTGTAA	TAGAAGACGCACCGGCCATCAGGATTCAAATTGTAAGTTAATATTCATAGCTTACAGTTTGAATCCTGATGGTTTTTTGGCAAGCAAAAGACGGCATACGAGATCCACCACATGGTACACCACATTCGCCGTCTTCGT	CLL-H-028350	AOAH	Homo sapiens acyloxyacyl hydrolase (neutrophil) (AOAH), mRNA.		313	NM_001637.2	4502114	NP_001628.1	7	7p14.2a	12.1461	16.3322	14.2392	2.96003	20.7879	114.056	16.7097	65.3828	68.8342	105.279	8.01001	1.1735	4.59176	4.83414	0.403958	0		4.25572
13856	TGCAACCAGTACTGTGCA	GAGTGGATTCAGCCTGGATAA	TAGAAGACGCACCGGGAGTGGATTTAGCTTGGATAAGTTAATATTCATAGCTTATCCAGGCTGAATCCACTCTTTTTTGGCAAGCAAAAGACGGCATACGAGATCCTGCACAGTACTGGTTGCATTCGCCGTCTTCGT	CLL-H-041330	NSFL1C	Homo sapiens NSFL1 (p97) cofactor (p47) (NSFL1C), transcript variant 3, mRNA.	UBXD10; p47; MGC3347; dJ776F14.1; UBX1	55968	NM_016143.3	33286433	NP_872289.1	20	20p13e	4.35743	6.09473	5.22608	1.22846	23.5063	15.7777	32.1837	23.9807	11.6008	48.3757	3.01903	6.15829	4.58866	2.2198	0.150865	0		4.25196
27370	TGTGGTACACCACAACAC	CCGGAGAGACAATGGAGAGAA	TAGAAGACGCACCGGCCGGAGAGATAATGGAGAGAGGTTAATATTCATAGCTTCTCTCCATTGTCTCTCCGGTTTTTTGGCAAGCAAAAGACGGCATACGAGATCCGTGTTGTGGTGTACCACATTCGCCGTCTTCGT	CLL-H-054844	ZNF787	Homo sapiens zinc finger protein 787 (ZNF787), mRNA.	TIP20	126208	NM_001002836.2	152963636	NP_001002836.2	19	19q13.42c	2.71678	7.40297	5.05987	3.31364	65.4886	18.5563	27.7354	23.1459	6.49063	28.0423	3.66734	5.48144	4.57439	1.28277	0.0724665	0		4.23464
802	ACACACCACATGACTGAC	CCGTATTGAAATGGAGTCAAA	TAGAAGACGCACCGGCCGTATTGAAATGGAGTTAAAGTTAATATTCATAGCTTTGACTCCATTTCAATACGGTTTTTTGGCAAGCAAAAGACGGCATACGAGATCCGTCAGTCATGTGGTGTGTTTCGCCGTCTTCGT	CLL-H-028276	ANKRD11	Homo sapiens ankyrin repeat domain 11 (ANKRD11), mRNA.	LZ16; T13; ANCO-1	29123	NM_013275.4	56676396	NP_037407.4	16	16q24.3a-q24.3b	16.7417	24.4412	20.5915	5.44439	26.44	68.6921	119.667	94.1797	36.0449	38.2725	3.33595	5.8115	4.57372	1.75048	0.103921	0		4.23383
24201	CAGTTGCAACTGACTGTG	GAGTCTGATTGGCCTTACATT	TAGAAGACGCACCGGGAGTCTGATTGGCCTTATATTGTTAATATTCATAGCAATGTAAGGCCAATCAGACTCTTTTTTGGCAAGCAAAAGACGGCATACGAGATCCCACAGTCAGTTGCAACTGTTCGCCGTCTTCGT	CLL-H-051675	TMEM70	Homo sapiens transmembrane protein 70 (TMEM70), transcript variant 1, mRNA.	FLJ20533	54968	NM_001040613.2	95007018	NP_060336.3	8	8q21.11a	11.4757	15.024	13.2499	2.50899	18.936	58.0609	63.0748	60.5678	3.54539	5.85358	4.382	4.76041	4.57121	0.267579	0.00418635	0		4.23077
18262	CAGTGTGTACTGACACAC	CGGGTTAGCCATCGTTACATT	TAGAAGACGCACCGGCGGGTTAGCTATCGTTATATTGTTAATATTCATAGCAATGTAACGATGGCTAACCCGTTTTTTGGCAAGCAAAAGACGGCATACGAGATCCGTGTGTCAGTACACACTGTTCGCCGTCTTCGT	CLL-H-045736	PSKH2	Homo sapiens protein serine kinase H2 (PSKH2), mRNA.		85481	NM_033126.1	14916454	NP_149117.1	8	8q21.2b	2.52272	3.11485	2.81879	0.418701	14.8539	4.94109	20.7588	12.8499	11.1848	87.0417	1.75291	7.36444	4.55868	3.96795	0.332589	0		4.21557
22489	CACAGTTGCACACAACAC	GTGAAGCATCCCAACTGACTA	TAGAAGACGCACCGGGTGAAGCATCCTAACTGATTAGTTAATATTCATAGCTAGTCAGTTGGGATGCTTCACTTTTTTGGCAAGCAAAAGACGGCATACGAGATCCGTGTTGTGTGCAACTGTGTTCGCCGTCTTCGT	CLL-H-049963	SPATA20	Homo sapiens spermatogenesis associated 20 (SPATA20), mRNA.	MGC111032; FLJ21347; Tisp78; DKFZp686H1839; SSP411; FLJ21969	64847	NM_022827.2	31542722	NP_073738.2	17	17q21.33b	4.84257	4.52692	4.68475	0.223195	4.76429	19.5228	23.135	21.3289	2.55427	11.9756	4.1673	4.93838	4.55284	0.54523	0.0116583	0		4.20848
26889	TGGTGTTGACCACAACAC	AGGAGAAATCAGCTCTTATTA	TAGAAGACGCACCGGAGGAGAAATCAGCTCTTATTAGTTAATATTCATAGCTAATAAGAGCTGATTTCTCCTTTTTTTGGCAAGCAAAAGACGGCATACGAGATCCGTGTTGTGGTCAACACCATTCGCCGTCTTCGT	CLL-H-054363	ZNF304	Homo sapiens zinc finger protein 304 (ZNF304), mRNA.	MGC129703; MGC129704	57343	NM_020657.2	10190695	NP_065708.1	19	19q13.43b	13.5751	19.3225	16.4488	4.06404	24.7072	82.8751	66.8293	74.8522	11.3461	15.158	5.03837	4.06287	4.55062	0.689784	0.020635	0		4.20579
5332	GTTGACCAGTCAGTTGTG	CTGCAGAGACAGACTCTGAAT	TAGAAGACGCACCGGCTGCAGAGATAGACTTTGAATGTTAATATTCATAGCATTCAGAGTCTGTCTCTGCAGTTTTTTGGCAAGCAAAAGACGGCATACGAGATCCCACAACTGACTGGTCAACTTCGCCGTCTTCGT	CLL-H-032806	DSPP	Homo sapiens dentin sialophosphoprotein (DSPP), mRNA.	DTDP2; DMP3; DGI1; DPP; DSP; DFNA39	1834	NM_014208.3	111119006	NP_055023.2	4	4q22.1a	16.8123	20.1635	18.4879	2.36968	12.8175	40.7731	127.338	84.0554	61.2104	72.8215	2.2054	6.88763	4.54651	3.31084	0.269278	0		4.20081
24993	GTGTTGTGGTTGTGTGTG	GCAGATCCTCTACTCCACAGA	TAGAAGACGCACCGGGCAGATCCTTTACTCCATAGAGTTAATATTCATAGCTCTGTGGAGTAGAGGATCTGCTTTTTTGGCAAGCAAAAGACGGCATACGAGATCCCACACACAACCACAACACTTCGCCGTCTTCGT	CLL-H-052467	TRMT61A	Homo sapiens tRNA methyltransferase 61 homolog A (S. cerevisiae) (TRMT61A), mRNA.	TRM61; FLJ40452; GCD14; Gcd14p	115708	NM_152307.2	123173771	NP_689520.2	14	14q32.33a	0.176414	20.8176	10.497	14.5955	139.045	64.7295	30.6154	47.6725	24.1223	50.6001	6.16647	2.91658	4.54153	2.29802	0.203228	0		4.19475
26466	CATGACACACGTTGACAC	GAAGAATCTAGCCGAGAAGAA	TAGAAGACGCACCGGGAAGAATCTAGCTGAGAAGAAGTTAATATTCATAGCTTCTTCTCGGCTAGATTCTTCTTTTTTGGCAAGCAAAAGACGGCATACGAGATCCGTGTCAACGTGTGTCATGTTCGCCGTCTTCGT	CLL-H-053940	ZCCHC3	Homo sapiens zinc finger, CCHC domain containing 3 (ZCCHC3), mRNA.	MGC104290; C20orf99	85364	NM_033089.6	55769555	NP_149080.2	20	20p13f	5.94516	3.32251	4.63383	1.85449	40.0206	18.8341	23.1731	21.0036	3.06807	14.6074	4.06448	5.00084	4.53266	0.662102	0.0231512	0		4.18399
22339	CAGTACGTGTGTACTGTG	GCACAAGTACAGCCTGATGAA	TAGAAGACGCACCGGGCACAAGTATAGCTTGATGAAGTTAATATTCATAGCTTCATCAGGCTGTACTTGTGCTTTTTTGGCAAGCAAAAGACGGCATACGAGATCCCACAGTACACACGTACTGTTCGCCGTCTTCGT	CLL-H-049813	SNX8	Homo sapiens sorting nexin 8 (SNX8), mRNA.	Mvp1	29886	NM_013321.1	23943857	NP_037453.1	7	7p22.2c	8.07095	23.4445	15.7577	10.8707	68.9867	76.9675	65.8598	71.4136	7.85436	10.9984	4.88443	4.17953	4.53198	0.498446	0.0278268	0		4.18317
14770	CATGACACTGTGGTTGGT	CCGTGACTGCAAATTTGGTCA	TAGAAGACGCACCGGCCGTGACTGTAAATTTGGTTAGTTAATATTCATAGCTGACCAAATTTGCAGTCACGGTTTTTTGGCAAGCAAAAGACGGCATACGAGATCCACCAACCACAGTGTCATGTTCGCCGTCTTCGT	CLL-H-042244	OR2T11	Homo sapiens olfactory receptor, family 2, subfamily T, member 11 (OR2T11), mRNA.	OR2T11Q	127077	NM_001001964.1	50233857	NP_001001964.1	1	1q44f	18.7969	22.8423	20.8196	2.86049	13.7394	173.615	15.0653	94.3401	112.111	118.838	8.33901	0.723613	4.53131	5.3849	0.451743	0		4.18235
5979	GTGTGTACTGGTGTACAC	CCTTGGGAAGATATGGGACTT	TAGAAGACGCACCGGCCTTGGGAAGATGTGGGATTTGTTAATATTCATAGCAAGTCCCATATCTTCCCAAGGTTTTTTGGCAAGCAAAAGACGGCATACGAGATCCGTGTACACCAGTACACACTTCGCCGTCTTCGT	CLL-H-033453	EPS15L1	Homo sapiens epidermal growth factor receptor pathway substrate 15-like 1 (EPS15L1), mRNA.	EPS15R	58513	NM_021235.1	10864046	NP_067058.1	19	19p13.11f	0.0176414	5.12913	2.57338	3.61437	140.452	6.76531	16.5006	11.6329	6.88388	59.1757	2.62895	6.41202	4.52048	2.67503	0.241145	0		4.16921
14759	GTCAGTGTTGACCAACCA	CCGGGAGATTAACCACTTCTT	TAGAAGACGCACCGGCCGGGAGATTAATCATTTCTTGTTAATATTCATAGCAAGAAGTGGTTAATCTCCCGGTTTTTTGGCAAGCAAAAGACGGCATACGAGATCCTGGTTGGTCAACACTGACTTCGCCGTCTTCGT	CLL-H-042233	OR2T1	Homo sapiens olfactory receptor, family 2, subfamily T, member 1 (OR2T1), mRNA.	OR1-25	26696	NM_030904.1	53793654	NP_112166.1	1	1q44f	30.9519	29.2485	30.1002	1.20446	4.00152	17.2636	253.858	135.561	167.298	123.411	0.573539	8.43377	4.50366	5.55802	0.466743	0		4.14879
21637	CAACTGGTCAACTGACCA	GCAATGCAACTACTTTGGGAT	TAGAAGACGCACCGGGCAATGCAATTACTTTGGGATGTTAATATTCATAGCATCCCAAAGTAGTTGCATTGCTTTTTTGGCAAGCAAAAGACGGCATACGAGATCCTGGTCAGTTGACCAGTTGTTCGCCGTCTTCGT	CLL-H-049111	SLC26A3	Homo sapiens solute carrier family 26, member 3 (SLC26A3), mRNA.	CLD; DRA	1811	NM_000111.2	4557534	NP_000102.1	7	7q22.3c-q31.1a	8.89127	3.49902	6.19515	3.8129	61.5465	25.5753	30.2257	27.9005	3.28835	11.786	4.12828	4.87894	4.50361	0.530794	0.025866	0		4.14873
11054	CACAACGTTGACCACAGT	GCAGTCTGGCTTTCAGAATTC	TAGAAGACGCACCGGGCAGTTTGGCTTTCAGAATTTGTTAATATTCATAGCGAATTCTGAAAGCCAGACTGCTTTTTTGGCAAGCAAAAGACGGCATACGAGATCCACTGTGGTCAACGTTGTGTTCGCCGTCTTCGT	CLL-H-038528	LOC644623	PREDICTED: Homo sapiens similar to transmembrane phosphatase with tensin homology isoform beta (LOC644623), mRNA.		644623	XR_042296.2	113424176		13	13q14.3d	6.13921	6.21933	6.17927	0.0566503	0.91678	21.9873	33.562	27.7746	8.18454	29.4677	3.55823	5.43138	4.4948	1.32452	0.0649078	0		4.13805
1480	CATGGTCATGACTGTGGT	GAGGGATCATTGCCAGAGATT	TAGAAGACGCACCGGGAGGGATTATTGCTAGAGATTGTTAATATTCATAGCAATCTCTGGCAATGATCCCTCTTTTTTGGCAAGCAAAAGACGGCATACGAGATCCACCACAGTCATGACCATGTTCGCCGTCTTCGT	CLL-H-028954	BAGE	Homo sapiens B melanoma antigen (BAGE), mRNA.	BAGE1	574	NM_001187.1	4557346	NP_001178.1	21	21p11.1d	22.8103	19.499	21.1547	2.34148	11.0684	176.055	13.9723	95.0137	114.61	120.625	8.32228	0.660481	4.49138	5.41771	0.458382	0		4.13389
20513	CATGGTGTGTGTTGTGTG	TCTCGCATAGGAGCCTATATA	TAGAAGACGCACCGGTCTCGCATAGGAGCTTATATAGTTAATATTCATAGCTATATAGGCTCCTATGCGAGATTTTTTGGCAAGCAAAAGACGGCATACGAGATCCCACACAACACACACCATGTTCGCCGTCTTCGT	CLL-H-047987	SCO1	Homo sapiens SCO cytochrome oxidase deficient homolog 1 (yeast) (SCO1), nuclear gene encoding mitochondrial protein, mRNA.	SCOD1	6341	NM_004589.2	4759067	NP_004580.1	17	17p13.1a	12.0314	26.2998	19.1656	10.0892	52.6424	140.912	30.739	85.8254	77.9039	90.7703	7.35233	1.60386	4.47809	4.06478	0.35298	0		4.11777
22162	GTTGACTGCAACTGTGCA	CGGATCCATAAGAATGACTTT	TAGAAGACGCACCGGCGGATCTATAAGAATGACTTTGTTAATATTCATAGCAAAGTCATTCTTATGGATCCGTTTTTTGGCAAGCAAAAGACGGCATACGAGATCCTGCACAGTTGCAGTCAACTTCGCCGTCTTCGT	CLL-H-049636	SLIT1	Homo sapiens slit homolog 1 (Drosophila) (SLIT1), mRNA.	SLIL1; MEGF4; Slit-1; SLIT3	6585	NM_003061.2	4507060	NP_003052.1	10	10q24.1b	14.5806	24.7008	19.6407	7.15604	36.4347	111.446	63.5976	87.522	33.8342	38.658	5.67426	3.23805	4.45615	1.72266	0.10897	0		4.09113
2765	GTGTGTCAGTGTTGTGAC	CCCACAGGTTGTCATATCCTT	TAGAAGACGCACCGGCCCACAGGTTGTTATATCTTTGTTAATATTCATAGCAAGGATATGACAACCTGTGGGTTTTTTGGCAAGCAAAAGACGGCATACGAGATCCGTCACAACACTGACACACTTCGCCGTCTTCGT	CLL-H-030239	CBX1	Homo sapiens chromobox homolog 1 (HP1 beta homolog Drosophila ) (CBX1), mRNA.	M31; HP1Hs-beta; CBX; HP1-BETA; MOD1	10951	NM_001127228.1	34147635	NP_006798.1	17	17q21.32b	18.3647	39.3718	28.8682	14.8542	51.4553	75.9648	176.697	126.331	71.2284	56.3824	2.63143	6.12081	4.37612	2.46736	0.198675	0		3.994
13835	CATGACCAGTACTGTGGT	GCTACCTATGATCCTGGATTT	TAGAAGACGCACCGGGCTACCTATGATCTTGGATTTGTTAATATTCATAGCAAATCCAGGATCATAGGTAGCTTTTTTGGCAAGCAAAAGACGGCATACGAGATCCACCACAGTACTGGTCATGTTCGCCGTCTTCGT	CLL-H-041309	NRXN1	Homo sapiens neurexin 1 (NRXN1), transcript variant alpha, mRNA.	FLJ35941; DKFZp313P2036; Hs.22998; KIAA0578	9378	NM_001135659.1	154330995	NP_004792.1	2	2p16.3c-p16.3b	9.90565	3.9974	6.95153	4.17777	60.0986	36.0615	24.7509	30.4062	7.99784	26.3033	5.18757	3.5605	4.37403	1.15052	0.0666841	0		3.99147
19803	GTGTGTGTCATGTGACGT	CCACACGATATGTTTATCTTT	TAGAAGACGCACCGGCCACACGATATGTTTATCTTTGTTAATATTCATAGCAAAGATAAACATATCGTGTGGTTTTTTGGCAAGCAAAAGACGGCATACGAGATCCACGTCACATGACACACACTTCGCCGTCTTCGT	CLL-H-047277	RNF139	Homo sapiens ring finger protein 139 (RNF139), mRNA.	HRCA1; MGC31961; RCA1; TRC8	11236	NM_007218.3	38045935	NP_009149.2	8	8q24.13d	25.1478	22.0532	23.6005	2.18825	9.27207	174.944	31.1192	103.031	101.699	98.707	7.41271	1.31858	4.36565	4.3092	0.384549	0		3.98129
17160	CATGTGTGACGTCAACAC	GCTGAAAGACATCTATGGAAA	TAGAAGACGCACCGGGCTGAAAGACATTTATGGAAAGTTAATATTCATAGCTTTCCATAGATGTCTTTCAGCTTTTTTGGCAAGCAAAAGACGGCATACGAGATCCGTGTTGACGTCACACATGTTCGCCGTCTTCGT	CLL-H-044634	PLCXD3	Homo sapiens phosphatidylinositol-specific phospholipase C, X domain containing 3 (PLCXD3), mRNA.		345557	NM_001005473.2	53828919	NP_001005473.1	5	5p13.1a	11.8727	2.82414	7.3484	6.39828	87.0704	31.8453	32.0602	31.9527	0.151948	0.47554	4.33363	4.36288	4.34826	0.0206777	0.0322058	0		3.96018
21337	GTACCATGCAGTTGACGT	CCTTTGCATACCAGCCTTCAT	TAGAAGACGCACCGGCCTTTGCATACTAGCCTTTATGTTAATATTCATAGCATGAAGGCTGGTATGCAAAGGTTTTTTGGCAAGCAAAAGACGGCATACGAGATCCACGTCAACTGCATGGTACTTCGCCGTCTTCGT	CLL-H-048811	SLC16A10	Homo sapiens solute carrier family 16, member 10 (aromatic amino acid transporter) (SLC16A10), mRNA.	TAT1; PRO0813	117247	NM_018593.4	45433547	NP_061063.2	6	6q21h	23.3661	24.7839	24.075	1.00254	4.16426	165.726	43.5802	104.653	86.3701	82.53	6.88375	1.81019	4.34697	3.58755	0.31786	0		3.95862
5766	CATGCATGTGTGTGACAC	CCGTGACTTTAACACCAATAA	TAGAAGACGCACCGGCCGTGACTTTAACACTAATAAGTTAATATTCATAGCTTATTGGTGTTAAAGTCACGGTTTTTTGGCAAGCAAAAGACGGCATACGAGATCCGTGTCACACACATGCATGTTCGCCGTCTTCGT	CLL-H-033240	ELAVL2	Homo sapiens ELAV (embryonic lethal, abnormal vision, Drosophila)-like 2 (Hu antigen B) (ELAVL2), mRNA.	HUB; HEL-N1; HELN1	1993	NM_001171195.1	115511031	NP_004423.2	9	9p21.3b	30.0345	29.1758	29.6052	0.60719	2.05096	234.309	22.6978	128.504	149.632	116.442	7.91448	0.766684	4.34058	5.05425	0.448612	0		3.95087
4190	ACTGTGTGGTGTCAACTG	CGTGCGCCGTATCCGCGACAT	TAGAAGACGCACCGGCGTGCGCCGTATTCGCGATATGTTAATATTCATAGCATGTCGCGGATACGGCGCACGTTTTTTGGCAAGCAAAAGACGGCATACGAGATCCCAGTTGACACCACACAGTTTCGCCGTCTTCGT	CLL-H-031664	CRYBB2	Homo sapiens crystallin, beta B2 (CRYBB2), mRNA.	CCA2; D22S665; CRYB2; CRYB2A	1415	NM_000496.2	98986448	NP_000487.1	22	22q11.23c	10.1703	10.8085	10.4894	0.451327	4.30269	12.0084	79.0241	45.5163	47.3872	104.111	1.14481	7.5337	4.33926	4.51763	0.40561	0		3.94926
10844	CAGTTGGTACCAACACCA	CCACAGATGTCTGTTGCCAAA	TAGAAGACGCACCGGCCACAGATGTTTGTTGCTAAAGTTAATATTCATAGCTTTGGCAACAGACATCTGTGGTTTTTTGGCAAGCAAAAGACGGCATACGAGATCCTGGTGTTGGTACCAACTGTTCGCCGTCTTCGT	CLL-H-038318	LHX3	Homo sapiens LIM homeobox 3 (LHX3), transcript variant 1, mRNA.	M2-LHX3; DKFZp762A2013	8022	NM_014564.2	30089941	NP_835258.1	9	9q34.3d	0.114669	20.0597	10.0872	14.1032	139.814	72.111	14.9323	43.5216	40.4314	92.8997	7.14878	1.48032	4.31455	4.00821	0.384575	0		3.91928
14716	GTGTCATGACTGGTTGCA	CACACCCATGTATTTCCTACT	TAGAAGACGCACCGGCACACCCATGTATTTCTTACTGTTAATATTCATAGCAGTAGGAAATACATGGGTGTGTTTTTTGGCAAGCAAAAGACGGCATACGAGATCCTGCAACCAGTCATGACACTTCGCCGTCTTCGT	CLL-H-042190	OR2L1P	Homo sapiens olfactory receptor, family 2, subfamily L, member 1 pseudogene (OR2L1P), non-coding RNA.	HTPCRX02; HSHTPCRX02; OR2L7P; OR2L1	26247	NR_002145.1	48597027		1	1q44e	4.23394	9.24074	6.73734	3.54034	52.5481	33.8749	23.6768	28.7758	7.21112	25.0596	5.02793	3.51427	4.2711	1.07032	0.0604714	0		3.86654
20688	CAGTCAACGTCAACTGGT	GAAAGGATGGACCAATATCAA	TAGAAGACGCACCGGGAAAGGATGGACCAATATTAAGTTAATATTCATAGCTTGATATTGGTCCATCCTTTCTTTTTTGGCAAGCAAAAGACGGCATACGAGATCCACCAGTTGACGTTGACTGTTCGCCGTCTTCGT	CLL-H-048162	SEMG1	Homo sapiens semenogelin I (SEMG1), transcript variant 1, mRNA.	SEMG; SGI; MGC14719	6406	NM_003007.3	38049012	NP_002998.1	20	20q13.12b	7.62991	7.29914	7.46453	0.233888	3.13332	18.0489	45.6903	31.8696	19.5454	61.3294	2.41795	6.12099	4.26947	2.61844	0.219487	0		3.86456
100	GTCAACTGACCAACTGCA	CCATGGTGTCAAGTGGCTAAA	TAGAAGACGCACCGGCCATGGTGTTAAGTGGTTAAAGTTAATATTCATAGCTTTAGCCACTTGACACCATGGTTTTTTGGCAAGCAAAAGACGGCATACGAGATCCTGCAGTTGGTCAGTTGACTTCGCCGTCTTCGT	CLL-H-027574	ABI1	Homo sapiens abl-interactor 1 (ABI1), transcript variant 1, mRNA.	SSH3BP1; SSH3BP; E3B1; ABI-1; NAP1BP	10006	NM_001012750.1	61743941	NP_005461.2	10	10p12.1b	8.10623	16.4049	12.2556	5.86805	47.8807	66.2759	38.2859	52.2809	19.7919	37.8569	5.40782	3.12396	4.26589	1.61493	0.111246	0		3.86022
17005	CAGTACGTGTACCACACA	GCTGAAGCGTTTGGGCAAAGT	TAGAAGACGCACCGGGCTGAAGTGTTTGGGTAAAGTGTTAATATTCATAGCACTTTGCCCAAACGCTTCAGCTTTTTTGGCAAGCAAAAGACGGCATACGAGATCCTGTGTGGTACACGTACTGTTCGCCGTCTTCGT	CLL-H-044479	PITPNM3	Homo sapiens PITPNM family member 3 (PITPNM3), mRNA.	NIR1; MGC157740; MGC157741; RDGBA3	83394	NM_001165966.1	141802227	NP_112497.1	17	17p13.2a	3.57239	5.7521	4.66224	1.54129	33.059	21.3711	18.3636	19.8673	2.12668	10.7044	4.58387	3.93878	4.26133	0.45615	0.0145931	0		3.85468
25256	GTGTGTCAACCAACTGCA	GAGATTCTGTTGCTCGAATTT	TAGAAGACGCACCGGGAGATTCTGTTGCTTGAATTTGTTAATATTCATAGCAAATTCGAGCAACAGAATCTCTTTTTTGGCAAGCAAAAGACGGCATACGAGATCCTGCAGTTGGTTGACACACTTCGCCGTCTTCGT	CLL-H-052730	TTC38	Homo sapiens tetratricopeptide repeat domain 38 (TTC38), mRNA.		55020	NM_017931.2	116812607	NP_060401.2	22	22q13.31d	22.9779	18.5645	20.7712	3.12075	15.0244	83.5395	93.1865	88.363	6.82142	7.71978	4.02188	4.48632	4.2541	0.328407	0.00610207	0		3.84591
3694	GTACTGGTCATGACACGT	GCTGCCAATGCTCAGAAGAAT	TAGAAGACGCACCGGGCTGCTAATGCTTAGAAGAATGTTAATATTCATAGCATTCTTCTGAGCATTGGCAGCTTTTTTGGCAAGCAAAAGACGGCATACGAGATCCACGTGTCATGACCAGTACTTCGCCGTCTTCGT	CLL-H-031168	CMPK1	Homo sapiens cytidine monophosphate (UMP-CMP) kinase 1, cytosolic (CMPK1), mRNA.	RP11-511I2.1; UMK; UMP-CMPK; CMPK; CMK; UMPK	51727	NM_001136140.1	7706496	NP_057392.1	1	1p33d	12.2961	12.3556	12.3258	0.042092	0.341495	34.0078	70.8118	52.4098	26.0244	49.6556	2.75907	5.745	4.25203	2.11137	0.161268	0		3.84339
4031	TGACCACAGTGTGTACCA	TGGGCCAGATTGTGTCACAAA	TAGAAGACGCACCGGTGGGCTAGATTGTGTCATAAAGTTAATATTCATAGCTTTGTGACACAATCTGGCCCATTTTTTGGCAAGCAAAAGACGGCATACGAGATCCTGGTACACACTGTGGTCATTCGCCGTCTTCGT	CLL-H-031505	CPNE6	Homo sapiens copine VI (neuronal) (CPNE6), mRNA.	N-COPINE	9362	NM_006032.2	12545386	NP_006023.1	14	14q12a	4.96606	12.0233	8.4947	4.99025	58.7455	35.4816	36.6986	36.0901	0.86051	2.38434	4.17692	4.32018	4.24855	0.1013	0.0164234	0		3.83916
1121	GTTGGTCACAACACTGTG	CTCTGCTCCTTGTCTTTCTTA	TAGAAGACGCACCGGCTCTGCTCTTTGTCTTTCTTAGTTAATATTCATAGCTAAGAAAGACAAGGAGCAGAGTTTTTTGGCAAGCAAAAGACGGCATACGAGATCCCACAGTGTTGTGACCAACTTCGCCGTCTTCGT	CLL-H-028595	ARMC6	Homo sapiens armadillo repeat containing 6 (ARMC6), mRNA.	R30923_1; MGC19595	93436	NM_033415.2	16445355	NP_219483.1	19	19p13.11b	24.1952	15.4185	19.8069	6.20604	31.3328	139.643	28.6479	84.1456	78.4856	93.2736	7.05025	1.44636	4.2483	3.96254	0.367217	0		3.83887
22307	GTCATGACACTGCAACCA	GCTACAAAGTGTCTCCAACTA	TAGAAGACGCACCGGGCTACAAAGTGTCTCTAACTAGTTAATATTCATAGCTAGTTGGAGACACTTTGTAGCTTTTTTGGCAAGCAAAAGACGGCATACGAGATCCTGGTTGCAGTGTCATGACTTCGCCGTCTTCGT	CLL-H-049781	SNRPE	Homo sapiens small nuclear ribonucleoprotein polypeptide E (SNRPE), mRNA.	B-raf; SME	6635	NM_003094.2	61098048	NP_003085.1	1	1q32.1e	19.6525	31.3977	25.5251	8.30511	32.537	100.042	116.341	108.191	11.5248	10.6522	3.91935	4.55788	4.23862	0.451506	0.0144456	0		3.82711
175	CAACGTTGGTTGCACAGT	CGAGAAGATGACCCAGATCAT	TAGAAGACGCACCGGCGAGAAGATGACTCAGATTATGTTAATATTCATAGCATGATCTGGGTCATCTTCTCGTTTTTTGGCAAGCAAAAGACGGCATACGAGATCCACTGTGCAACCAACGTTGTTCGCCGTCTTCGT	CLL-H-027649	ACTB	Homo sapiens actin, beta (ACTB), mRNA.	PS1TP5BP1; beta-actin	60	NM_001101.3	5016088	NP_001092.1	7	7p22.1c	36.2707	4.92147	20.5961	22.1673	107.629	88.1665	86.2954	87.2309	1.32308	1.51676	4.28074	4.18989	4.23531	0.0642395	0.0512959	0		3.8231
8968	ACGTCAACGTTGTGACGT	CCTACGCTGAAGAGTTAGCAA	TAGAAGACGCACCGGCCTACGTTGAAGAGTTAGTAAGTTAATATTCATAGCTTGCTAACTCTTCAGCGTAGGTTTTTTGGCAAGCAAAAGACGGCATACGAGATCCACGTCACAACGTTGACGTTTCGCCGTCTTCGT	CLL-H-036442	HSDL1	Homo sapiens hydroxysteroid dehydrogenase like 1 (HSDL1), mRNA.	MGC125994; MGC126032; MGC125995	83693	NM_001146051.1	24432036	NP_113651.3	16	16q24.1a	5.55704	12.1998	8.87845	4.69717	52.9053	45.5934	29.5794	37.5864	11.3236	30.1269	5.13529	3.33159	4.23344	1.2754	0.0803428	0		3.82083
4331	TGCACACAACTGGTACGT	CAGCTCCTTCAAGCCAGTGAA	TAGAAGACGCACCGGCAGCTCTTTCAAGCTAGTGAAGTTAATATTCATAGCTTCACTGGCTTGAAGGAGCTGTTTTTTGGCAAGCAAAAGACGGCATACGAGATCCACGTACCAGTTGTGTGCATTCGCCGTCTTCGT	CLL-H-031805	CTDSP1	Homo sapiens CTD (carboxy-terminal domain, RNA polymerase II, polypeptide A) small phosphatase 1 (CTDSP1), transcript variant 1, mRNA.	NLIIF; SCP1	58190	NM_021198.1	10864008	NP_067021.1	2	2q35e	32.5043	32.436	32.4702	0.0482804	0.148692	22.543	250.93	136.737	161.494	118.106	0.694268	7.72803	4.21115	4.97362	0.457592	0		3.79378
6524	ACTGACGTACGTTGACCA	CCTGGACATCTTTGACTACAT	TAGAAGACGCACCGGCCTGGACATCTTTGATTACATGTTAATATTCATAGCATGTAGTCAAAGATGTCCAGGTTTTTTGGCAAGCAAAAGACGGCATACGAGATCCTGGTCAACGTACGTCAGTTTCGCCGTCTTCGT	CLL-H-033998	FBXO21	Homo sapiens F-box protein 21 (FBXO21), transcript variant 1, mRNA.	FBX21; MGC26682; FLJ90233; DKFZp434G058; KIAA0875	23014	NM_015002.2	53692180	NP_296373.1	12	12q24.22b	58.7018	53.6378	56.1698	3.58079	6.37493	407.235	63.7401	235.488	242.888	103.142	7.25008	1.13478	4.19243	4.32417	0.406096	0		3.77106
25944	TGTGTGACTGGTACACAC	CGTCAAACTTACCTGATAGTA	TAGAAGACGCACCGGCGTCAAACTTACTTGATAGTAGTTAATATTCATAGCTACTATCAGGTAAGTTTGACGTTTTTTGGCAAGCAAAAGACGGCATACGAGATCCGTGTGTACCAGTCACACATTCGCCGTCTTCGT	CLL-H-053418	USPL1	Homo sapiens ubiquitin specific peptidase like 1 (USPL1), mRNA.	D13S106E; C13orf22; DKFZp781K2286; RP11-121O19.1; bA121O19.1; FLJ32952	10208	NM_005800.4	34222300	NP_005791.2	13	13q12.3c	12.7547	24.0778	18.4163	8.00663	43.4758	138.81	15.0178	76.9137	87.5341	113.808	7.53733	0.815464	4.1764	4.75308	0.44597	0		3.7516
18939	TGGTGTCACAACGTACCA	GCTGTTATGAAAGAAACAGTT	TAGAAGACGCACCGGGCTGTTATGAAAGAAACAGTTGTTAATATTCATAGCAACTGTTTCTTTCATAACAGCTTTTTTGGCAAGCAAAAGACGGCATACGAGATCCTGGTACGTTGTGACACCATTCGCCGTCTTCGT	CLL-H-046413	RABEP1	Homo sapiens rabaptin, RAB GTPase binding effector protein 1 (RABEP1), transcript variant 2, mRNA.	RABPT5; RAB5EP	9135	NM_001083585.1	134152673	NP_001077054.1	17	17p13.2b	20.6757	31.9273	26.3015	7.95603	30.2493	152.159	67.1619	109.661	60.1021	54.8074	5.78519	2.55354	4.16936	2.28512	0.191271	0		3.74306
6615	CAGTTGGTCAGTGTACGT	GCAGGTGATGTGGTAGAGTTT	TAGAAGACGCACCGGGCAGGTGGTGTGGTAGGGTTTGTTAATATTCATAGCAAACTCTACCACATCACCTGCTTTTTTGGCAAGCAAAAGACGGCATACGAGATCCACGTACACTGACCAACTGTTCGCCGTCTTCGT	CLL-H-034089	FCGBP	Homo sapiens Fc fragment of IgG binding protein (FCGBP), mRNA.	FC(GAMMA)BP	8857	NM_003890.2	4503680	NP_003881.1	19	19q13.2b	0.0617449	5.30564	2.68369	3.70799	138.168	15.5119	6.76752	11.1397	6.18321	55.506	5.78006	2.52172	4.15089	2.30399	0.239047	0		3.72064
3788	CACAACTGTGTGCAACCA	GCTGAAATTATAGCTTCGCTA	TAGAAGACGCACCGGGCTGAAATTATAGCTTTGCTAGTTAATATTCATAGCTAGCGAAGCTATAATTTCAGCTTTTTTGGCAAGCAAAAGACGGCATACGAGATCCTGGTTGCACACAGTTGTGTTCGCCGTCTTCGT	CLL-H-031262	CNTN5	Homo sapiens contactin 5 (CNTN5), transcript variant 1, mRNA.	HNB-2s; MGC163491; NB-2	53942	NM_014361.2	28373127	NP_055176.1	11	11q22.1b-q22.1c	23.7806	28.8851	26.3329	3.6094	13.7068	188.414	30.1782	109.296	111.89	102.373	7.15509	1.14603	4.15056	4.24905	0.404592	0		3.72024
6984	GTTGTGGTACCAGTTGAC	CCAGACTCTGCTACAGGCAAT	TAGAAGACGCACCGGCCAGACTCTGTTACAGGTAATGTTAATATTCATAGCATTGCCTGTAGCAGAGTCTGGTTTTTTGGCAAGCAAAAGACGGCATACGAGATCCGTCAACTGGTACCACAACTTCGCCGTCTTCGT	CLL-H-034458	FMO6P	Homo sapiens flavin containing monooxygenase 6 pseudogene (FMO6P), non-coding RNA.	FMO6; FLJ27001	388714	NR_002601.1	83281198		1	1q24.3a	16.9005	13.0824	14.9914	2.69979	18.0089	101.794	22.023	61.9084	56.4065	91.1129	6.79013	1.46904	4.12958	3.76258	0.36096	0		3.69478
26919	CACAGTCAGTACTGACCA	GCAGGCAGTGTAAGCAAAGTT	TAGAAGACGCACCGGGCAGGTAGTGTAAGTAAAGTTGTTAATATTCATAGCAACTTTGCTTACACTGCCTGCTTTTTTGGCAAGCAAAAGACGGCATACGAGATCCTGGTCAGTACTGACTGTGTTCGCCGTCTTCGT	CLL-H-054393	ZNF337	Homo sapiens zinc finger protein 337 (ZNF337), mRNA.		26152	NM_015655.2	34147336	NP_056470.1	20	20p11.21a	4.34861	8.55547	6.45204	2.9747	46.1048	24.331	28.9426	26.6368	3.26089	12.2421	3.77105	4.4858	4.12842	0.505404	0.0230844	0		3.69338
7210	GTACGTGTACCATGACAC	GAGACACACAAGAGCACCAAA	TAGAAGACGCACCGGGAGACACATAAGAGCACTAAAGTTAATATTCATAGCTTTGGTGCTCTTGTGTGTCTCTTTTTTGGCAAGCAAAAGACGGCATACGAGATCCGTGTCATGGTACACGTACTTCGCCGTCTTCGT	CLL-H-034684	FXYD5	Homo sapiens FXYD domain containing ion transport regulator 5 (FXYD5), transcript variant 2, mRNA.	dysad; OIT2; PRO6241; HSPC113; RIC; IWU1; KCT1; IWU-1	53827	NM_001164605.1	47778936	NP_054883.3	19	19q13.12a	9.31467	24.5139	16.9143	10.7475	63.5409	67.3753	72.114	69.7446	3.3508	4.80439	3.98333	4.2635	4.12342	0.198105	0.021959	0		3.6873
23364	GTTGTGTGACACTGACTG	GCCATCTTGCTGATGTGAATT	TAGAAGACGCACCGGGCCATCTTGTTGATGTGAATTGTTAATATTCATAGCAATTCACATCAGCAAGATGGCTTTTTTGGCAAGCAAAAGACGGCATACGAGATCCCAGTCAGTGTCACACAACTTCGCCGTCTTCGT	CLL-H-050838	TAF5	Homo sapiens TAF5 RNA polymerase II, TATA box binding protein (TBP)-associated factor, 100kDa (TAF5), mRNA.	TAFII100; TAF2D	6877	NM_006951.3	50363367	NP_008882.2	10	10q24.33a	33.845	9.2615	21.5533	17.3832	80.6522	165.726	11.7671	88.7465	108.865	122.67	7.68913	0.545955	4.11754	5.05099	0.479556	0		3.68017
20622	TGGTACTGGTACACTGAC	CGCAGTTTGAATAAGGCAGTT	TAGAAGACGCACCGGCGCAGTTTGAATAAGGTAGTTGTTAATATTCATAGCAACTGCCTTATTCAAACTGCGTTTTTTGGCAAGCAAAAGACGGCATACGAGATCCGTCAGTGTACCAGTACCATTCGCCGTCTTCGT	CLL-H-048096	SECISBP2	Homo sapiens SECIS binding protein 2 (SECISBP2), mRNA.	DKFZp686C09169; SBP2	79048	NM_024077.3	83779009	NP_076982.3	9	9q22.2a	18.3382	25.8325	22.0854	5.29926	23.9944	132.95	47.9429	90.4467	60.1094	66.4584	6.01984	2.1708	4.09532	2.72168	0.250291	0		3.65319
7651	GTTGTGTGTGTGTGTGGT	GCACTATCCTTGGACCCTGGT	TAGAAGACGCACCGGGCACTATCTTTGGACCTTGGTGTTAATATTCATAGCACCAGGGTCCAAGGATAGTGCTTTTTTGGCAAGCAAAAGACGGCATACGAGATCCACCACACACACACACAACTTCGCCGTCTTCGT	CLL-H-035125	GLYCTK	Homo sapiens glycerate kinase (GLYCTK), mRNA.	HBeAgBP4A; HBEBP2; HBEBP4; GLYCTK1	132158	NM_001144951.1	31543062	NP_660305.2	3	3p21.1d	20.0406	22.5515	21.2961	1.77548	8.33711	152.014	22.3651	87.1896	91.6757	105.145	7.13812	1.0502	4.09416	4.30481	0.416427	0		3.65179
9795	CACAGTACCAACTGACAC	CGAGGGCCAAAGTCGGAAGTT	TAGAAGACGCACCGGCGAGGGCTAAAGTTGGAAGTTGTTAATATTCATAGCAACTTCCGACTTTGGCCCTCGTTTTTTGGCAAGCAAAAGACGGCATACGAGATCCGTGTCAGTTGGTACTGTGTTCGCCGTCTTCGT	CLL-H-037269	KCNH6	Homo sapiens potassium voltage-gated channel, subfamily H (eag-related), member 6 (KCNH6), transcript variant 1, mRNA.	HERG2; ERG2; Kv11.2	81033	NM_030779.2	27886649	NP_110406.1	17	17q23.3a	31.9839	24.0467	28.0153	5.61245	20.0335	212.02	17.3085	114.664	137.682	120.074	7.56801	0.617824	4.09292	4.91453	0.467678	0		3.65028
4350	TGTGGTCATGGTCAACGT	GCAGTATTGTTCGTTCTGATA	TAGAAGACGCACCGGGCAGTATTGTTTGTTCTGATAGTTAATATTCATAGCTATCAGAACGAACAATACTGCTTTTTTGGCAAGCAAAAGACGGCATACGAGATCCACGTTGACCATGACCACATTCGCCGTCTTCGT	CLL-H-031824	CTNND2	Homo sapiens catenin (cadherin-associated protein), delta 2 (neural plakophilin-related arm-repeat protein) (CTNND2), mRNA.	NPRAP; GT24	1501	NM_001332.2	36951195	NP_001323.1	5	5p15.2c-p15.2b	24.1776	34.6268	29.4022	7.38873	25.1299	197.595	42.7817	120.189	109.47	91.0817	6.72043	1.45505	4.08774	3.72319	0.362497	0		3.644
9145	GTTGACACCATGCAACAC	GCAGTTGTAAATGTAACCTAT	TAGAAGACGCACCGGGCAGTTGTAAATGTAACCTATGTTAATATTCATAGCATAGGTTACATTTACAACTGCTTTTTTGGCAAGCAAAAGACGGCATACGAGATCCGTGTTGCATGGTGTCAACTTCGCCGTCTTCGT	CLL-H-036619	IGF2BP3	Homo sapiens insulin-like growth factor 2 mRNA binding protein 3 (IGF2BP3), mRNA.	IMP-3; VICKZ3; KOC1; DKFZp686F1078; IMP3	10643	NM_006547.2	30795211	NP_006538.2	7	7p15.3b	8.38849	11.9091	10.1488	2.48947	24.5296	33.1863	49.7584	41.4723	11.7183	28.2556	3.26997	4.90288	4.08642	1.15464	0.0659793	0		3.6424
12796	GTTGGTCACAACTGACTG	CCCAGATCAGAAGTACTCCAT	TAGAAGACGCACCGGCCCAGATTAGAAGTACTCTATGTTAATATTCATAGCATGGAGTACTTCTGATCTGGGTTTTTTGGCAAGCAAAAGACGGCATACGAGATCCCAGTCAGTTGTGACCAACTTCGCCGTCTTCGT	CLL-H-040270	MYBL2	Homo sapiens v-myb myeloblastosis viral oncogene homolog (avian)-like 2 (MYBL2), mRNA.	B-MYB; MGC15600; BMYB	4605	NM_002466.2	31652260	NP_002457.1	20	20q13.12a	56.92	52.4853	54.7027	3.13581	5.73247	212.733	232.976	222.854	14.3139	6.42297	3.88889	4.25895	4.07392	0.261667	0.00377551	0		3.62722
7506	TGTGGTACTGCAGTCAAC	CAGAGGATATCGGCATTTGTT	TAGAAGACGCACCGGCAGAGGATATCGGTATTTGTTGTTAATATTCATAGCAACAAATGCCGATATCCTCTGTTTTTTGGCAAGCAAAAGACGGCATACGAGATCCGTTGACTGCAGTACCACATTCGCCGTCTTCGT	CLL-H-034980	GJB2	Homo sapiens gap junction protein, beta 2, 26kDa (GJB2), mRNA.	DFNB1; NSRD1; HID; DFNA3; PPK; KID; CX26	2706	NM_004004.5	118572604	NP_003995.2	13	13q12.11a	12.9047	30.9201	21.9124	12.7388	58.1353	88.1423	90.0974	89.1198	1.3824	1.55118	4.02249	4.1117	4.06709	0.0630878	0.0176942	0		3.61894
7533	GTGTTGTGCATGTGTGAC	GACAGGACCATACCCTCTTTG	TAGAAGACGCACCGGGACAGGACTATACCTTCTTTGGTTAATATTCATAGCCAAAGAGGGTATGGTCCTGTCTTTTTTGGCAAGCAAAAGACGGCATACGAGATCCGTCACACATGCACAACACTTCGCCGTCTTCGT	CLL-H-035007	GJC2	Homo sapiens gap junction protein, gamma 2, 47kDa (GJC2), mRNA.	MGC105119; PMLDAR; CX46.6; GJA12; Cx47	57165	NM_020435.2	45439366	NP_065168.2	1	1q42.13c	9.80863	4.87994	7.34428	3.48511	47.4533	35.542	23.9334	29.7377	8.20852	27.603	4.83942	3.25879	4.0491	1.11767	0.070957	0		3.5971
14052	GTGTACGTTGCAGTACAC	GCAGAGCAACTTGTGCAAGTA	TAGAAGACGCACCGGGCAGAGCAATTTGTGTAAGTAGTTAATATTCATAGCTACTTGCACAAGTTGCTCTGCTTTTTTGGCAAGCAAAAGACGGCATACGAGATCCGTGTACTGCAACGTACACTTCGCCGTCTTCGT	CLL-H-041526	NXF5	Homo sapiens nuclear RNA export factor 5 (NXF5), mRNA.		55998	NM_032946.2	15487659	NP_116564.1	X	Xq22.1d	3.14017	5.12913	4.13465	1.4064	34.0151	9.61641	23.8479	16.7322	10.0632	60.1428	2.32581	5.76782	4.04681	2.43387	0.221639	0		3.59432
8403	CATGACACACGTACACTG	CCTGGAATCTACACCCTGTTA	TAGAAGACGCACCGGCCTGGAATTTACACCTTGTTAGTTAATATTCATAGCTAACAGGGTGTAGATTCCAGGTTTTTTGGCAAGCAAAAGACGGCATACGAGATCCCAGTGTACGTGTGTCATGTTCGCCGTCTTCGT	CLL-H-035877	GZMK	Homo sapiens granzyme K (granzyme 3; tryptase II) (GZMK), mRNA.	TRYP2	3003	NM_002104.2	73747815	NP_002095.1	5	5q11.2d	8.64429	0.103828	4.37406	6.03902	138.064	9.22982	26.1386	17.6842	11.9563	67.6101	2.11013	5.97582	4.04297	2.73346	0.295141	0		3.58966
4253	CACAGTGTGTGTGTACCA	GAAATAATGGAAGTCCCTAAA	TAGAAGACGCACCGGGAAATAATGGAAGTCCCTAAAGTTAATATTCATAGCTTTAGGGACTTCCATTATTTCTTTTTTGGCAAGCAAAAGACGGCATACGAGATCCTGGTACACACACACTGTGTTCGCCGTCTTCGT	CLL-H-031727	CSN2	Homo sapiens casein beta (CSN2), mRNA.	CASB	1447	NM_001891.2	4503086	NP_001882.1	4	4q13.3a	14.2543	9.96754	12.1109	3.03117	25.0285	54.3279	43.2475	48.7877	7.83501	16.0594	4.48587	3.57096	4.02841	0.646939	0.0252435	0		3.57199
7397	CATGTGCATGACGTACCA	CCATGCTTGATGCAATCAGAA	TAGAAGACGCACCGGCCATGCTTGATGCAATTAGAAGTTAATATTCATAGCTTCTGATTGCATCAAGCATGGTTTTTTGGCAAGCAAAAGACGGCATACGAGATCCTGGTACGTCATGCACATGTTCGCCGTCTTCGT	CLL-H-034871	GDA	Homo sapiens guanine deaminase (GDA), mRNA.	CYPIN; GUANASE; MGC9982; KIAA1258; NEDASIN	9615	NM_004293.3	111125009	NP_004284.1	9	9q21.13a	17.6591	12.2829	14.971	3.80151	25.3925	100.332	20.2455	60.2888	56.6297	93.9307	6.70176	1.35232	4.02704	3.78263	0.376043	0		3.57033
22453	TGACCAGTGTCATGTGCA	GCCACTGACATTGAAGAACCA	TAGAAGACGCACCGGGCCACTGATATTGAAGAATCAGTTAATATTCATAGCTGGTTCTTCAATGTCAGTGGCTTTTTTGGCAAGCAAAAGACGGCATACGAGATCCTGCACATGACACTGGTCATTCGCCGTCTTCGT	CLL-H-049927	SPANXA1	Homo sapiens sperm protein associated with the nucleus, X-linked, family member A1 (SPANXA1), mRNA.	SPAN-Xb; SPANX-C; SPANX; SPANXD; SPANXA2; NAP-X; SPANX-D; SPANXC; SPANX-A2; SPAN-Xa	30014	NM_013453.2	14192936	NP_038481.2	X	Xq27.2a	26.2681	25.0123	25.6402	0.887969	3.46319	39.3355	167.068	103.202	90.3208	87.5186	1.53413	6.51588	4.02501	3.52263	0.34853	0		3.56786
3470	ACCAGTACACTGACACGT	CCGTGATTAACCTGGAGCCTA	TAGAAGACGCACCGGCCGTGATTAACTTGGAGCTTAGTTAATATTCATAGCTAGGCTCCAGGTTAATCACGGTTTTTTGGCAAGCAAAAGACGGCATACGAGATCCACGTGTCAGTGTACTGGTTTCGCCGTCTTCGT	CLL-H-030944	CILP	Homo sapiens cartilage intermediate layer protein, nucleotide pyrophosphohydrolase (CILP), mRNA.	HsT18872	8483	NM_003613.3	51944961	NP_003604.2	15	15q22.31b	0.582167	9.09538	4.83877	6.01975	124.407	27.7861	11.0447	19.4154	11.8379	60.9718	5.74239	2.28255	4.01247	2.44647	0.260794	0		3.55264
20894	ACGTGTACACACACACAC	CTACGAGACCATTGCCTTCAA	TAGAAGACGCACCGGCTACGAGACTATTGCCTTTAAGTTAATATTCATAGCTTGAAGGCAATGGTCTCGTAGTTTTTTGGCAAGCAAAAGACGGCATACGAGATCCGTGTGTGTGTGTACACGTTTCGCCGTCTTCGT	CLL-H-048368	SF3A2	Homo sapiens splicing factor 3a, subunit 2, 66kDa (SF3A2), mRNA.	SF3a66; SAP62; PRPF11; PRP11	8175	NM_007165.4	54112114	NP_009096.2	19	19p13.3g	6.57143	7.70407	7.13775	0.800904	11.2207	35.6508	21.4622	28.5565	10.0329	35.1334	4.99468	3.00685	4.00077	1.40561	0.0949435	0		3.53844
24111	TGGTACTGCATGTGTGCA	ATGGCAAGGTGCCAGGATTTG	TAGAAGACGCACCGGATGGTAAGGTGCTAGGATTTGGTTAATATTCATAGCCAAATCCTGGCACCTTGCCATTTTTTTGGCAAGCAAAAGACGGCATACGAGATCCTGCACACATGCAGTACCATTCGCCGTCTTCGT	CLL-H-051585	TMEM155	Homo sapiens transmembrane protein 155 (TMEM155), mRNA.	FLJ30834	132332	NM_152399.2	112181170	NP_689612.2	4	4q27c	1.68475	13.3108	7.49778	8.22086	109.644	18.5804	41.2705	29.9255	16.0443	53.6141	2.47812	5.50435	3.99124	2.13987	0.220585	0		3.52688
8359	CAGTCAGTCACAACTGGT	CATCATTGGTTCCCACGATGT	TAGAAGACGCACCGGCATCATTGGTTTCCATGATGTGTTAATATTCATAGCACATCGTGGGAACCAATGATGTTTTTTGGCAAGCAAAAGACGGCATACGAGATCCACCAGTTGTGACTGACTGTTCGCCGTCTTCGT	CLL-H-035833	GUCY2D	Homo sapiens guanylate cyclase 2D, membrane (retina-specific) (GUCY2D), mRNA.	LCA1; CYGD; CORD6; ROS-GC1; GUC1A4; GUC2D; retGC; LCA; RETGC-1	3000	NM_000180.3	4504216	NP_000171.1	17	17p13.1d	23.8159	14.7229	19.2694	6.42974	33.3676	45.0618	108.67	76.8659	44.9778	58.5146	2.33852	5.63951	3.98902	2.33416	0.214879	0		3.52418
24391	ACTGACGTTGTGTGTGGT	ACGCAGTCTGGTGGCATATTG	TAGAAGACGCACCGGACGCAGTTTGGTGGTATATTGGTTAATATTCATAGCCAATATGCCACCAGACTGCGTTTTTTTGGCAAGCAAAAGACGGCATACGAGATCCACCACACACAACGTCAGTTTCGCCGTCTTCGT	CLL-H-051865	TNN	Homo sapiens tenascin N (TNN), mRNA.	TN-W	63923	NM_022093.1	62988323	NP_071376.1	1	1q25.1b	18.4617	11.878	15.1699	4.65542	30.6886	40.7972	80.1172	60.4572	27.8034	45.9885	2.68936	5.28134	3.98535	1.8328	0.151041	0		3.51973
5304	TGTGCAACTGCACAACAC	TCATTCATTCAAGATGGCATT	TAGAAGACGCACCGGTCATTCATTCAAGATGGCATTGTTAATATTCATAGCAATGCCATCTTGAATGAATGATTTTTTGGCAAGCAAAAGACGGCATACGAGATCCGTGTTGTGCAGTTGCACATTCGCCGTCTTCGT	CLL-H-032778	DSCR8	Homo sapiens Down syndrome critical region gene 8 (DSCR8), transcript variant 2, mRNA.	MTAG2; C21orf65; MMA-1	84677	NR_026838.1	44680116	NP_982252.1	21	21q22.13b	19.3703	19.5094	19.4398	0.0983617	0.50598	46.137	108.556	77.3465	44.1369	57.0638	2.37332	5.58421	3.97876	2.27044	0.204685	0		3.51174
14283	CACACATGACGTGTTGAC	GACAGGTACCTGGCAATATGT	TAGAAGACGCACCGGGACAGGTATCTGGTAATATGTGTTAATATTCATAGCACATATTGCCAGGTACCTGTCTTTTTTGGCAAGCAAAAGACGGCATACGAGATCCGTCAACACGTCATGTGTGTTCGCCGTCTTCGT	CLL-H-041757	OR10G3	Homo sapiens olfactory receptor, family 10, subfamily G, member 3 (OR10G3), mRNA.	OR14-40	26533	NM_001005465.1	53793668	NP_001005465.1	14	14q11.2d	32.3543	27.743	30.0487	3.26073	10.8515	153.609	84.9552	119.282	48.5454	40.698	5.112	2.82725	3.96963	1.61556	0.12203	0		3.50065
682	TGCAGTACTGCAACACGT	CCTGGCATCTACTCCATCCAT	TAGAAGACGCACCGGCCTGGCATCTATTCCATCTATGTTAATATTCATAGCATGGATGGAGTAGATGCCAGGTTTTTTGGCAAGCAAAAGACGGCATACGAGATCCACGTGTTGCAGTACTGCATTCGCCGTCTTCGT	CLL-H-028156	ALX3	Homo sapiens aristaless-like homeobox 3 (ALX3), mRNA.		257	NM_006492.2	5729727	NP_006483.1	1	1p13.3b	26.2151	32.8306	29.5229	4.67782	15.8447	183.956	50.2051	117.081	94.5762	80.7787	6.23097	1.70055	3.96576	3.20349	0.321093	0		3.49595
174	GTACGTTGGTTGCACACA	CGAGAAGATGACCCAGATCAT	TAGAAGACGCACCGGCGAGAAGATGACTCAGATTATGTTAATATTCATAGCATGATCTGGGTCATCTTCTCGTTTTTTGGCAAGCAAAAGACGGCATACGAGATCCTGTGTGCAACCAACGTACTTCGCCGTCTTCGT	CLL-H-027648	ACTB	Homo sapiens actin, beta (ACTB), mRNA.	PS1TP5BP1; beta-actin	60	NM_001101.3	5016088	NP_001092.1	7	7p22.1c	33.2188	48.4048	40.8118	10.7382	26.3114	182.712	140.949	161.83	29.5308	18.248	4.47693	3.45363	3.96528	0.723586	0.0320953	0		3.49537
25125	ACGTCATGACCAACTGAC	GCAGATAACAATACCCTCAAA	TAGAAGACGCACCGGGCAGATAACAATACCCTTAAAGTTAATATTCATAGCTTTGAGGGTATTGTTATCTGCTTTTTTGGCAAGCAAAAGACGGCATACGAGATCCGTCAGTTGGTCATGACGTTTCGCCGTCTTCGT	CLL-H-052599	TSGA10	Homo sapiens testis specific, 10 (TSGA10), mRNA.	CEP4L	80705	NM_025244.2	13376857	NP_079520.1	2	2q11.2c	20.9404	1.85853	11.3994	13.4929	118.364	52.5157	37.8867	45.2012	10.3443	22.885	4.60687	3.32356	3.96521	0.907438	0.106643	0		3.49529
25679	CAACGTTGCAGTGTACTG	CCTCTTCAATGGACAGAAGTT	TAGAAGACGCACCGGCCTCTTCAATGGATAGAAGTTGTTAATATTCATAGCAACTTCTGTCCATTGAAGAGGTTTTTTGGCAAGCAAAAGACGGCATACGAGATCCCAGTACACTGCAACGTTGTTCGCCGTCTTCGT	CLL-H-053153	ULBP1	Homo sapiens UL16 binding protein 1 (ULBP1), mRNA.	RAET1I	80329	NM_025218.2	56181385	NP_079494.1	6	6q25.1b	5.81285	7.26799	6.54042	1.02895	15.7321	9.72513	42.0879	25.9065	22.8839	88.3327	1.48693	6.43504	3.96099	3.49885	0.354384	0		3.49016
1576	GTTGCACAGTCAACTGAC	CATCTGCTAATAGTCACAGAA	TAGAAGACGCACCGGCATCTGCTAATAGTCATAGAAGTTAATATTCATAGCTTCTGTGACTATTAGCAGATGTTTTTTGGCAAGCAAAAGACGGCATACGAGATCCGTCAGTTGACTGTGCAACTTCGCCGTCTTCGT	CLL-H-029050	BBS9	Homo sapiens Bardet-Biedl syndrome 9 (BBS9), transcript variant 2, mRNA.	B1; PTHB1; D1; C18; MGC118917	27241	NM_001033604.1	75905799	NP_940820.1	7	7p14.3b	31.7722	12.9474	22.3598	13.3111	59.5315	54.3279	122.367	88.3473	48.1107	54.4563	2.42971	5.47262	3.95116	2.15166	0.202487	0		3.47824
22002	GTTGTGTGCAGTTGACTG	GCTAGTGTGTTTCTTCTGCAT	TAGAAGACGCACCGGGCTAGTGTGTTTCTTCTGTATGTTAATATTCATAGCATGCAGAAGAAACACACTAGCTTTTTTGGCAAGCAAAAGACGGCATACGAGATCCCAGTCAACTGCACACAACTTCGCCGTCTTCGT	CLL-H-049476	SLC6A6	Homo sapiens solute carrier family 6 (neurotransmitter transporter, taurine), member 6 (SLC6A6), transcript variant 1, mRNA.	MGC131729; TAUT; MGC10619	6533	NM_001134367.1	110082729	NP_003034.2	3	3p25.1a	14.122	15.3978	14.7599	0.902138	6.11211	72.5942	43.8368	58.2155	20.3346	34.9298	4.91835	2.97	3.94418	1.37769	0.0944188	0		3.46976
22305	ACCATGACACTGCAACAC	GCAGAAGAGATTCATTCTAAA	TAGAAGACGCACCGGGCAGAAGAGATTCATTCTAAAGTTAATATTCATAGCTTTAGAATGAATCTCTTCTGCTTTTTTGGCAAGCAAAAGACGGCATACGAGATCCGTGTTGCAGTGTCATGGTTTCGCCGTCTTCGT	CLL-H-049779	SNRPE	Homo sapiens small nuclear ribonucleoprotein polypeptide E (SNRPE), mRNA.	B-raf; SME	6635	NM_003094.2	61098048	NP_003085.1	1	1q32.1e	15.7185	8.28551	12.002	5.25591	43.792	41.6429	52.4103	47.0266	7.61367	16.1901	3.46966	4.36679	3.91823	0.634366	0.0331611	0		3.43826
20401	ACACGTACACTGTGACGT	CTGCCGAAATTGACCAGAGAT	TAGAAGACGCACCGGCTGCTGAAATTGACTAGAGATGTTAATATTCATAGCATCTCTGGTCAATTTCGGCAGTTTTTTGGCAAGCAAAAGACGGCATACGAGATCCACGTCACAGTGTACGTGTTTCGCCGTCTTCGT	CLL-H-047875	SATB2	Homo sapiens SATB homeobox 2 (SATB2), mRNA.	MGC119474; MGC119477; KIAA1034; FLJ21474; FLJ32076	23314	NM_001172509.1	38016201	NP_056080.1	2	2q33.1c-q33.1d	25.9593	18.2115	22.0854	5.47854	24.8061	69.7914	102.473	86.1321	23.1092	26.83	3.16007	4.63984	3.89995	1.04636	0.0623884	0		3.41608
18068	ACGTCAACCATGCAACCA	GCCTACTCTGAAAGCCAATAT	TAGAAGACGCACCGGGCCTACTCTGAAAGCTAATATGTTAATATTCATAGCATATTGGCTTTCAGAGTAGGCTTTTTTGGCAAGCAAAAGACGGCATACGAGATCCTGGTTGCATGGTTGACGTTTCGCCGTCTTCGT	CLL-H-045542	PRPF3	Homo sapiens PRP3 pre-mRNA processing factor 3 homolog (S. cerevisiae) (PRPF3), mRNA.	HPRP3P; HPRP3; Prp3p; RP18; PRP3	9129	NM_004698.2	4758555	NP_004689.1	1	1q21.2b	13.187	9.03308	11.11	2.93723	26.4377	59.6797	26.7089	43.1943	23.3139	53.9745	5.3717	2.40404	3.88787	2.09846	0.193232	0		3.40142
10155	GTCAACCAGTTGCACACA	TTTGATCTGGCAACCATATTT	TAGAAGACGCACCGGTTTGATCTGGCAACCATATTTGTTAATATTCATAGCAAATATGGTTGCCAGATCAAATTTTTTGGCAAGCAAAAGACGGCATACGAGATCCTGTGTGCAACTGGTTGACTTCGCCGTCTTCGT	CLL-H-037629	KIF11	Homo sapiens kinesin family member 11 (KIF11), mRNA.	KNSL1; EG5; HKSP; TRIP5	3832	NM_004523.3	13699823	NP_004514.2	10	10q23.33a	6.64199	22.8734	14.7577	11.4774	77.7719	53.8205	60.651	57.2358	4.82995	8.43869	3.64694	4.10979	3.87836	0.327283	0.0403822	0		3.38988
4291	CAGTCACACAGTGTACTG	CCAAACCAACCACACCTTGAA	TAGAAGACGCACCGGCCAAACCAATCACACTTTGAAGTTAATATTCATAGCTTCAAGGTGTGGTTGGTTTGGTTTTTTGGCAAGCAAAAGACGGCATACGAGATCCCAGTACACTGTGTGACTGTTCGCCGTCTTCGT	CLL-H-031765	CST7	Homo sapiens cystatin F (leukocystatin) (CST7), mRNA.	CMAP	8530	NM_003650.3	20302138	NP_003641.2	20	20p11.21a	2.52272	15.2109	8.8668	8.97188	101.185	34.6843	33.9897	34.337	0.491173	1.43045	3.91171	3.83337	3.87254	0.0553947	0.0569613	0		3.38281
26860	CACAACGTGTACTGACAC	GAGCCCTGAATGTGATGGTTT	TAGAAGACGCACCGGGAGCCTTGAATGTGGTGGTTTGTTAATATTCATAGCAAACCATCACATTCAGGGCTCTTTTTTGGCAAGCAAAAGACGGCATACGAGATCCGTGTCAGTACACGTTGTGTTCGCCGTCTTCGT	CLL-H-054334	ZNF264	Homo sapiens zinc finger protein 264 (ZNF264), mRNA.		9422	NM_003417.4	108860682	NP_003408.1	19	19q13.43b	0.2558	12.8228	6.53931	8.88622	135.889	37.7408	12.8602	25.3005	17.5932	69.5371	5.77137	1.9666	3.86898	2.69038	0.310544	0		3.37849
13862	CATGACACCAACACTGAC	GCTGTGACCGAAATGCTACAA	TAGAAGACGCACCGGGCTGTGACTGAAATGCTATAAGTTAATATTCATAGCTTGTAGCATTTCGGTCACAGCTTTTTTGGCAAGCAAAAGACGGCATACGAGATCCGTCAGTGTTGGTGTCATGTTCGCCGTCTTCGT	CLL-H-041336	NSL1	Homo sapiens NSL1, MIND kinetochore complex component, homolog (S. cerevisiae) (NSL1), transcript variant 2, mRNA.	MIS14; C1orf48; DKFZP566O1646; DC8	25936	NM_001042549.1	110349760	NP_001036014.1	1	1q32.3c	21.3726	37.8351	29.6038	11.6408	39.3218	123.382	105.676	114.529	12.5203	10.932	4.16778	3.56967	3.86873	0.422929	0.0196659	0		3.37818
20214	TGCAACGTACGTGTACTG	CCGCCTCTTTCATGGACATAT	TAGAAGACGCACCGGCCGCTTCTTTCATGGATATATGTTAATATTCATAGCATATGTCCATGAAAGAGGCGGTTTTTTGGCAAGCAAAAGACGGCATACGAGATCCCAGTACACGTACGTTGCATTCGCCGTCTTCGT	CLL-H-047688	RYR1	Homo sapiens ryanodine receptor 1 (skeletal) (RYR1), transcript variant 2, mRNA.	CCO; SKRR; RYR; MHS1; MHS; RYDR	6261	NM_000540.2	113204616	NP_001036188.1	19	19q13.2a	14.563	53.3159	33.9395	27.4025	80.7393	240.616	20.0554	130.335	155.96	119.66	7.08955	0.590918	3.84023	4.59523	0.480014	0		3.3436
13093	TGTGCATGGTTGTGTGAC	CTAACGTGGATCTCAAGAATG	TAGAAGACGCACCGGCTAACGTGGATCTTAAGAATGGTTAATATTCATAGCCATTCTTGAGATCCACGTTAGTTTTTTGGCAAGCAAAAGACGGCATACGAGATCCGTCACACAACCATGCACATTCGCCGTCTTCGT	CLL-H-040567	NCAPH2	Homo sapiens non-SMC condensin II complex, subunit H2 (NCAPH2), transcript variant 2, mRNA.	MGC18000; CAP-H2; MGC8640; MGC5305; hCAP-H2; MGC2455; 384D8-2; MGC15858; 384D8_6; MGC4133	29781	NM_014551.4	148368977	NP_689512.2	22	22q13.33b	23.4895	28.9785	26.234	3.8813	14.7949	102.205	98.9274	100.566	2.31724	2.3042	3.89587	3.77096	3.83342	0.0883296	0.00184405	0		3.33533
25015	ACGTGTACGTCATGACTG	CCAGCCTTCGTTATGAACTTT	TAGAAGACGCACCGGCCAGCCTTTGTTATGAACTTTGTTAATATTCATAGCAAAGTTCATAACGAAGGCTGGTTTTTTGGCAAGCAAAAGACGGCATACGAGATCCCAGTCATGACGTACACGTTTCGCCGTCTTCGT	CLL-H-052489	TRPC3	Homo sapiens transient receptor potential cation channel, subfamily C, member 3 (TRPC3), mRNA.	TRP3	7222	NM_001130698.1	4507686	NP_003296.1	4	4q27c	17.1739	19.9558	18.5649	1.96712	10.5959	106.372	35.9002	71.1363	49.8314	70.0506	5.72977	1.93377	3.83177	2.68418	0.2745	0		3.33333
13085	GTTGACTGCATGACTGTG	GCTATGCAGAAGCATCTTCTT	TAGAAGACGCACCGGGCTATGCAGAAGTATCTTCTTGTTAATATTCATAGCAAGAAGATGCTTCTGCATAGCTTTTTTGGCAAGCAAAAGACGGCATACGAGATCCCACAGTCATGCAGTCAACTTCGCCGTCTTCGT	CLL-H-040559	NCAPG	Homo sapiens non-SMC condensin I complex, subunit G (NCAPG), mRNA.	NY-MEL-3; FLJ12450; HCAP-G; MGC126525; CHCG; CAPG	64151	NM_022346.3	50658080	NP_071741.2	4	4p15.32b	33.0953	33.7443	33.4198	0.458893	1.37312	52.9506	202.417	127.684	105.689	82.7738	1.58441	6.05681	3.82061	3.16246	0.334384	0		3.31979
18606	TGTGCAACGTACCATGGT	CCCAATTGCACGTGTGGGATT	TAGAAGACGCACCGGCCCAATTGCATGTGTGGGGTTGTTAATATTCATAGCAATCCCACACGTGCAATTGGGTTTTTTGGCAAGCAAAAGACGGCATACGAGATCCACCATGGTACGTTGCACATTCGCCGTCTTCGT	CLL-H-046080	PWWP2B	Homo sapiens PWWP domain containing 2B (PWWP2B), transcript variant 1, mRNA.	pp8607; RP11-273H7.1; FLJ46823; FLJ39621; PWWP2; bA432J24.1	170394	NM_001098637.1	148839375	NP_612508.3	10	10q26.3e	23.6042	21.3991	22.5016	1.55928	6.92963	24.6088	147.175	85.8917	86.6671	100.903	1.09365	6.54062	3.81713	3.85159	0.409703	0		3.31556
10180	CAGTTGCAGTTGCAACGT	GCCATGTGAAACCGTCAGTAA	TAGAAGACGCACCGGGCCATGTGAAATCGTTAGTAAGTTAATATTCATAGCTTACTGACGGTTTCACATGGCTTTTTTGGCAAGCAAAAGACGGCATACGAGATCCACGTTGCAACTGCAACTGTTCGCCGTCTTCGT	CLL-H-037654	KIF16B	Homo sapiens kinesin family member 16B (KIF16B), mRNA.	SNX23; KISC20ORF	55614	NM_024704.3	41327690	NP_078980.3	20	20p12.1b	10.1262	5.24334	7.68475	3.45268	44.929	37.2213	21.3956	29.3085	11.1904	38.1816	4.84352	2.78417	3.81384	1.45619	0.120676	0		3.31157
26604	GTTGGTGTTGACTGACCA	CCGTAGCAAGGAAAGCAACAA	TAGAAGACGCACCGGCCGTAGTAAGGAAAGCAATAAGTTAATATTCATAGCTTGTTGCTTTCCTTGCTACGGTTTTTTGGCAAGCAAAAGACGGCATACGAGATCCTGGTCAGTCAACACCAACTTCGCCGTCTTCGT	CLL-H-054078	ZHX2	Homo sapiens zinc fingers and homeoboxes 2 (ZHX2), mRNA.	KIAA0854	22882	NM_014943.3	63079684	NP_055758.1	8	8q24.13b	41.669	15.8961	28.7826	18.2242	63.3167	65.4423	153.752	109.597	62.4444	56.9763	2.27368	5.34184	3.80776	2.16952	0.221005	0		3.30419
23473	GTCAGTCATGCAACACGT	CCAATTTAGTTATCGCCAGAA	TAGAAGACGCACCGGCCAATTTAGTTATCGCTAGAAGTTAATATTCATAGCTTCTGGCGATAACTAAATTGGTTTTTTGGCAAGCAAAAGACGGCATACGAGATCCACGTGTTGCATGACTGACTTCGCCGTCTTCGT	CLL-H-050947	TAS2R8	Homo sapiens taste receptor, type 2, member 8 (TAS2R8), mRNA.	T2R8; TRB5	50836	NM_023918.1	12965173	NP_076407.1	12	12p13.2c	55.9409	36.1531	46.047	13.9921	30.3866	334.073	15.7592	174.916	225.082	128.68	7.25505	0.342242	3.79865	4.8881	0.503853	0		3.29313
10457	CAGTTGCAGTGTCAACCA	GCCTTCTTTCTGGATCAGAAA	TAGAAGACGCACCGGGCCTTCTTTCTGGATTAGAAAGTTAATATTCATAGCTTTCTGATCCAGAAAGAAGGCTTTTTTGGCAAGCAAAAGACGGCATACGAGATCCTGGTTGACACTGCAACTGTTCGCCGTCTTCGT	CLL-H-037931	KRT12	Homo sapiens keratin 12 (Meesmann corneal dystrophy) (KRT12), mRNA.	K12	3859	NM_000223.3	47132618	NP_000214.1	17	17q21.2a	13.4869	27.7014	20.5942	10.0512	48.8062	138.302	18.1259	78.2141	84.9775	108.647	6.71561	0.880149	3.79788	4.12629	0.441458	0		3.2922
25744	ACGTTGCATGTGTGACAC	GCATCTTATTCTGGGTAATAA	TAGAAGACGCACCGGGCATCTTATTCTGGGTAATAAGTTAATATTCATAGCTTATTACCCAGAATAAGATGCTTTTTTGGCAAGCAAAAGACGGCATACGAGATCCGTGTCACACATGCAACGTTTCGCCGTCTTCGT	CLL-H-053218	UPF1	Homo sapiens UPF1 regulator of nonsense transcripts homolog (yeast) (UPF1), mRNA.	KIAA0221; FLJ46894; HUPF1; FLJ43809; NORF1; pNORF1; RENT1	5976	NM_002911.3	88853067	NP_002902.2	19	19p13.11b	37.2322	17.9519	27.5921	13.6332	49.4098	25.4907	183.436	104.463	111.684	106.912	0.923842	6.64814	3.78599	4.04769	0.435873	0		3.27777
27383	ACGTCATGACCACAACGT	CCAGCTCTCACAAAGCATGAA	TAGAAGACGCACCGGCCAGCTCTTACAAAGTATGAAGTTAATATTCATAGCTTCATGCTTTGTGAGAGCTGGTTTTTTGGCAAGCAAAAGACGGCATACGAGATCCACGTTGTGGTCATGACGTTTCGCCGTCTTCGT	CLL-H-054857	ZNF8	Homo sapiens zinc finger protein 8 (ZNF8), mRNA.	Zfp128; HF.18	7554	NM_021089.2	33438574	NP_066575.1	19	19q13.43c	9.07651	4.35041	6.71346	3.34185	49.7784	25.527	25.2546	25.3908	0.19257	0.758424	3.80236	3.76179	3.78207	0.0286841	0.0156835	0		3.27301
4192	GTACTGCAACCAACTGGT	GATCTTGTACGAACTAGAGAA	TAGAAGACGCACCGGGATCTTGTACGAATTAGAGAAGTTAATATTCATAGCTTCTCTAGTTCGTACAAGATCTTTTTTGGCAAGCAAAAGACGGCATACGAGATCCACCAGTTGGTTGCAGTACTTCGCCGTCTTCGT	CLL-H-031666	CRYBB3	Homo sapiens crystallin, beta B3 (CRYBB3), mRNA.	MGC125774; CRYB3; CATCN2; MGC125772; MGC125773	1417	NM_004076.3	12056466	NP_004067.1	22	22q11.23c	3.06078	19.3952	11.228	11.5501	102.869	40.2053	44.7017	42.4535	3.17948	7.48933	3.58081	3.98128	3.78105	0.283175	0.0663537	0		3.27177
1072	GTACCAGTTGTGTGTGTG	ACCGGGTAGAACCACTTAATA	TAGAAGACGCACCGGACCGGGTAGAACCATTTAATAGTTAATATTCATAGCTATTAAGTGGTTCTACCCGGTTTTTTTGGCAAGCAAAAGACGGCATACGAGATCCCACACACACAACTGGTACTTCGCCGTCTTCGT	CLL-H-028546	ARL13B	Homo sapiens ADP-ribosylation factor-like 13B (ARL13B), transcript variant 1, mRNA.	MGC120612; ARL2L1; DKFZp761H079; MGC120611; DKFZp686M2074; DKFZp686L2472; DKFZp686E2075	200894	NM_144996.2	33598955	NP_878899.1	3	3q11.2a	57.9785	28.3867	43.1826	20.9246	48.456	132.805	192.551	162.678	42.2466	25.9694	3.07544	4.459	3.76722	0.978324	0.0697789	0		3.25498
4823	TGGTACCACAACTGTGTG	CTGAAGGGACTAGGCAATAAA	TAGAAGACGCACCGGCTGAAGGGACTAGGTAATAAAGTTAATATTCATAGCTTTATTGCCTAGTCCCTTCAGTTTTTTGGCAAGCAAAAGACGGCATACGAGATCCCACACAGTTGTGGTACCATTCGCCGTCTTCGT	CLL-H-032297	DENND2A	Homo sapiens DENN/MADD domain containing 2A (DENND2A), mRNA.	KIAA1277; FAM31D	27147	NM_015689.3	58866696	NP_056504.2	7	7q34c	29.5229	44.3763	36.9496	10.5029	28.425	151.458	126.254	138.856	17.8221	12.8349	4.09905	3.41693	3.75799	0.482335	0.0199881	0		3.24379
22796	ACGTTGGTACACACTGTG	GCAGATGTTGCACACAAACTT	TAGAAGACGCACCGGGCAGATGTTGCACACAAATTTGTTAATATTCATAGCAAGTTTGTGTGCAACATCTGCTTTTTTGGCAAGCAAAAGACGGCATACGAGATCCCACAGTGTGTACCAACGTTTCGCCGTCTTCGT	CLL-H-050270	SS18	Homo sapiens synovial sarcoma translocation, chromosome 18 (SS18), transcript variant 2, mRNA.	SYT-SSX2; SYT; SYT-SSX1; MGC116875; SSXT	6760	NM_001007559.1	56117843	NP_005628.2	18	18q11.2d	13.1781	8.98117	11.0796	2.96771	26.7852	21.2141	62.0293	41.6217	28.8607	69.3405	1.91469	5.59849	3.75659	2.60484	0.274976	0		3.24208
13563	ACTGCAGTCAACACTGAC	CGGGTCTCTAAGATGTCTTAT	TAGAAGACGCACCGGCGGGTCTTTAAGATGTCTTATGTTAATATTCATAGCATAAGACATCTTAGAGACCCGTTTTTTGGCAAGCAAAAGACGGCATACGAGATCCGTCAGTGTTGACTGCAGTTTCGCCGTCTTCGT	CLL-H-041037	NLRP7	Homo sapiens NLR family, pyrin domain containing 7 (NLRP7), transcript variant 2, mRNA.	MGC126470; PYPAF3; NALP7; HYDM; CLR19.4; PAN7; MGC126471; NOD12	199713	NM_001127255.1	75709195	NP_996611.2	19	19q13.42b	16.2301	32.571	24.4005	11.5548	47.3545	131.054	52.2392	91.6465	55.7303	60.8101	5.37093	2.1409	3.75592	2.28398	0.236699	0		3.24127
16707	CAGTGTCAGTACTGTGTG	GACGACTTAAGCCGAGTAAAT	TAGAAGACGCACCGGGACGACTTAAGCTGAGTAAATGTTAATATTCATAGCATTTACTCGGCTTAAGTCGTCTTTTTTGGCAAGCAAAAGACGGCATACGAGATCCCACACAGTACTGACACTGTTCGCCGTCTTCGT	CLL-H-044181	PGGT1B	Homo sapiens protein geranylgeranyltransferase type I, beta subunit (PGGT1B), mRNA.	BGGI; GGTI	5229	NM_005023.3	27597101	NP_005014.1	5	5q22.3b	17.906	0.0103828	8.95821	12.6541	141.257	59.4985	7.699	33.5987	36.6278	109.015	6.64179	0.859436	3.75061	4.08874	0.463432	0		3.23483
14423	GTACTGCACAGTACACAC	GCCATCACAATCTGGGTCATT	TAGAAGACGCACCGGGCCATCACAATTTGGGTTATTGTTAATATTCATAGCAATGACCCAGATTGTGATGGCTTTTTTGGCAAGCAAAAGACGGCATACGAGATCCGTGTGTACTGTGCAGTACTTCGCCGTCTTCGT	CLL-H-041897	OR12D2	Homo sapiens olfactory receptor, family 12, subfamily D, member 2 (OR12D2), mRNA.	MGC126791; dJ994E9.8; hs6M1-20; MGC126795	26529	NM_013936.3	21450849	NP_039224.2	6	6p22.1a	13.187	2.76184	7.9744	7.37167	92.4417	24.778	34.8926	29.8353	7.15217	23.9722	3.10719	4.37558	3.74139	0.896892	0.0949198	0		3.22363
20675	CAACGTGTGTCAGTCACA	GCAGGTAACCAGGATGGCTAA	TAGAAGACGCACCGGGCAGGTAACTAGGATGGTTAAGTTAATATTCATAGCTTAGCCATCCTGGTTACCTGCTTTTTTGGCAAGCAAAAGACGGCATACGAGATCCTGTGACTGACACACGTTGTTCGCCGTCTTCGT	CLL-H-048149	SEMA4D	Homo sapiens sema domain, immunoglobulin domain (Ig), transmembrane domain (TM) and short cytoplasmic domain, (semaphorin) 4D (SEMA4D), mRNA.	SEMAJ; M-sema G; M-sema-G; coll-4; CD100	10507	NM_001142287.1	33942063	NP_006369.2	9	9q22.2a	0.0705656	8.86695	4.46876	6.21999	139.188	9.03652	24.3802	16.7084	10.8496	64.9352	2.02215	5.45569	3.73892	2.42788	0.300549	0		3.22064
1715	CAGTCAACTGTGCAACAC	CCCGTATACTATGGTGCCATT	TAGAAGACGCACCGGCCCGTATATTATGGTGCTATTGTTAATATTCATAGCAATGGCACCATAGTATACGGGTTTTTTGGCAAGCAAAAGACGGCATACGAGATCCGTGTTGCACAGTTGACTGTTCGCCGTCTTCGT	CLL-H-029189	BOC	Homo sapiens Boc homolog (mouse) (BOC), mRNA.		91653	NM_033254.2	38372928	NP_150279.1	3	3q13.2b	16.6094	7.41335	12.0114	6.50258	54.1368	47.8283	41.9168	44.8726	4.18009	9.31546	3.98192	3.48976	3.73584	0.348011	0.0265709	0		3.2169
20504	TGACCACAGTCATGACTG	GCACCTAGATAGGTTAGCATA	TAGAAGACGCACCGGGCACCTAGATAGGTTAGTATAGTTAATATTCATAGCTATGCTAACCTATCTAGGTGCTTTTTTGGCAAGCAAAAGACGGCATACGAGATCCCAGTCATGACTGTGGTCATTCGCCGTCTTCGT	CLL-H-047978	SCNN1G	Homo sapiens sodium channel, nonvoltage-gated 1, gamma (SCNN1G), mRNA.	ENaCg; ENaCgamma; PHA1; SCNEG	6340	NM_001039.3	148839327	NP_001030.2	16	16p12.1c	35.7415	16.1972	25.9694	13.8199	53.2161	102.603	91.1334	96.8683	8.11037	8.37258	3.95093	3.50926	3.7301	0.312305	0.0246019	0		3.20993
20376	CAACGTCAACACACACGT	GCGGAAGAAGAAGCCTGACTA	TAGAAGACGCACCGGGCGGAAGAAGAAGTCTGATTAGTTAATATTCATAGCTAGTCAGGCTTCTTCTTCCGCTTTTTTGGCAAGCAAAAGACGGCATACGAGATCCACGTGTGTGTTGACGTTGTTCGCCGTCTTCGT	CLL-H-047850	SART1	Homo sapiens squamous cell carcinoma antigen recognized by T cells (SART1), mRNA.	MGC2038; Snu66; SART1259; Ara1; HOMS1	9092	NM_005146.4	119393884	NP_005137.1	11	11q13.1d	10.4261	26.4451	18.4356	11.3272	61.4419	64.3792	72.979	68.6791	6.08095	8.85416	3.49211	3.95859	3.72535	0.329849	0.0312124	0		3.20417
8710	GTACTGACCACATGTGTG	GCGACAACATCCAGGGTATCA	TAGAAGACGCACCGGGCGACAACATCTAGGGTATTAGTTAATATTCATAGCTGATACCCTGGATGTTGTCGCTTTTTTGGCAAGCAAAAGACGGCATACGAGATCCCACACATGTGGTCAGTACTTCGCCGTCTTCGT	CLL-H-036184	HIST1H4I	Homo sapiens histone cluster 1, H4i (HIST1H4I), mRNA.	H4FM; H4/m; H4M	8294	NM_003495.2	18105065	NP_003486.1	6	6p22.1c	15.3568	13.0097	14.1833	1.65968	11.7016	35.7474	69.7568	52.7521	24.0482	45.5873	2.52039	4.91824	3.71932	1.69553	0.152001	0		3.19685
16644	CAGTTGTGTGGTTGACAC	GTTGCCATTGAAGCCAGTAAT	TAGAAGACGCACCGGGTTGCCATTGAAGCTAGTAATGTTAATATTCATAGCATTACTGGCTTCAATGGCAACTTTTTTGGCAAGCAAAAGACGGCATACGAGATCCGTGTCAACCACACAACTGTTCGCCGTCTTCGT	CLL-H-044118	PFAS	Homo sapiens phosphoribosylformylglycinamidine synthase (FGAR amidotransferase) (PFAS), mRNA.	FGAMS; PURL; KIAA0361; FGARAT	5198	NM_012393.2	31657128	NP_036525.1	17	17p13.1c	7.7534	23.5587	15.656	11.176	71.3847	71.362	45.0249	58.1934	18.6231	32.0021	4.55811	2.87588	3.71699	1.18951	0.109378	0		3.19403
17023	ACGTACTGACACCAACGT	CGAGGAGTTCTGTGTCTACAA	TAGAAGACGCACCGGCGAGGAGTTCTGTGTTTATAAGTTAATATTCATAGCTTGTAGACACAGAACTCCTCGTTTTTTGGCAAGCAAAAGACGGCATACGAGATCCACGTTGGTGTCAGTACGTTTCGCCGTCTTCGT	CLL-H-044497	PKD1	Homo sapiens polycystic kidney disease 1 (autosomal dominant) (PKD1), transcript variant 1, mRNA.	PBP	5310	NM_000296.3	58331145	NP_001009944.1	16	16p13.3e-p13.3d	3.62531	2.40882	3.01707	0.860188	28.5107	6.22167	16.0634	11.1425	6.95912	62.4556	2.06216	5.32416	3.69316	2.30659	0.242931	0		3.1651
21111	GTTGTGACGTGTACACAC	CCTCATCTGAATACAAGGAAA	TAGAAGACGCACCGGCCTCATCTGAATATAAGGAAAGTTAATATTCATAGCTTTCCTTGTATTCAGATGAGGTTTTTTGGCAAGCAAAAGACGGCATACGAGATCCGTGTGTACACGTCACAACTTCGCCGTCTTCGT	CLL-H-048585	SH3TC2	Homo sapiens SH3 domain and tetratricopeptide repeats 2 (SH3TC2), mRNA.	KIAA1985; FLJ13605; CMT4C	79628	NM_024577.3	94538341	NP_078853.2	5	5q33.1b	6.48322	7.17455	6.82888	0.488844	7.15848	9.50768	40.8618	25.1847	22.1707	88.0323	1.39227	5.98366	3.68797	3.2466	0.362366	0		3.1588
21835	TGGTTGGTCAGTTGACGT	TGTGGCAATCATGCTACATAA	TAGAAGACGCACCGGTGTGGCAATCATGCTATATAAGTTAATATTCATAGCTTATGTAGCATGATTGCCACATTTTTTGGCAAGCAAAAGACGGCATACGAGATCCACGTCAACTGACCAACCATTCGCCGTCTTCGT	CLL-H-049309	SLC39A9	Homo sapiens solute carrier family 39 (zinc transporter), member 9 (SLC39A9), mRNA.	FLJ11274; MGC74989	55334	NM_018375.3	40254927	NP_060845.2	14	14q24.1e	25.236	21.1291	23.1826	2.90405	12.5268	133.373	37.1928	85.2831	68.0098	79.746	5.75317	1.60435	3.67876	2.93366	0.326039	0		3.14762
16799	TGTGGTGTTGTGTGACGT	GTCATCATCATTCAGCCTCAA	TAGAAGACGCACCGGGTCATCATCATTCAGCTTCAAGTTAATATTCATAGCTTGAGGCTGAATGATGATGACTTTTTTGGCAAGCAAAAGACGGCATACGAGATCCACGTCACACAACACCACATTCGCCGTCTTCGT	CLL-H-044273	PHF21B	Homo sapiens PHD finger protein 21B (PHF21B), mRNA.	BHC80L; PHF4; FLJ34161	112885	NM_001135862.1	19923936	NP_612424.1	22	22q13.31b	44.6857	34.2946	39.4901	7.34765	18.6063	229.501	61.0122	145.257	119.14	82.0201	5.81161	1.545	3.6783	3.01695	0.336816	0		3.14707
6318	TGCACACATGGTTGTGAC	TTCTGCGGCACCAAGTCATTC	TAGAAGACGCACCGGTTCTGCGGCACTAAGTCATTTGTTAATATTCATAGCGAATGACTTGGTGCCGCAGAATTTTTTGGCAAGCAAAAGACGGCATACGAGATCCGTCACAACCATGTGTGCATTCGCCGTCTTCGT	CLL-H-033792	FAM48B1	Homo sapiens family with sequence similarity 48, member B1 (FAM48B1), mRNA.		100130302	NM_001136234.1	210032508	NP_001129706.1	X	Xp22.11a	48.2934	49.4327	48.8631	0.805665	1.64882	291.222	68.236	179.729	157.675	87.7293	5.95997	1.39647	3.67822	3.22688	0.361348	0		3.14697
5323	GTACGTACGTTGACTGAC	GCTGAGATGAAGGAATACATA	TAGAAGACGCACCGGGCTGAGATGAAGGAATATATAGTTAATATTCATAGCTATGTATTCCTTCATCTCAGCTTTTTTGGCAAGCAAAAGACGGCATACGAGATCCGTCAGTCAACGTACGTACTTCGCCGTCTTCGT	CLL-H-032797	DSN1	Homo sapiens DSN1, MIND kinetochore complex component, homolog (S. cerevisiae) (DSN1), mRNA.	FLJ13346; dJ469A13.2; MIS13; C20orf172; MGC32987	79980	NM_001145315.1	31542256	NP_079194.2	20	20q11.23a	25.9858	49.3912	37.6885	16.5501	43.9129	47.3089	229.763	138.536	129.015	93.1272	1.25526	6.09637	3.67581	3.42318	0.38727	0		3.14405
21640	TGGTTGGTGTCATGACAC	CCAACCTGAAAGGGATGTTTA	TAGAAGACGCACCGGCCAACTTGAAAGGGATGTTTAGTTAATATTCATAGCTAAACATCCCTTTCAGGTTGGTTTTTTGGCAAGCAAAAGACGGCATACGAGATCCGTGTCATGACACCAACCATTCGCCGTCTTCGT	CLL-H-049114	SLC26A4	Homo sapiens solute carrier family 26, member 4 (SLC26A4), mRNA.	PDS; DFNB4	5172	NM_000441.1	4505696	NP_000432.1	7	7q22.3c	17.6238	22.7904	20.2071	3.65333	18.0795	32.5339	115.827	74.1806	58.8973	79.3972	1.61003	5.73202	3.67102	2.91469	0.325087	0		3.13823
12165	TGGTACTGGTTGTGTGAC	GTTCCGCATGATCGTTATAAT	TAGAAGACGCACCGGGTTCCGCATGATTGTTATAATGTTAATATTCATAGCATTATAACGATCATGCGGAACTTTTTTGGCAAGCAAAAGACGGCATACGAGATCCGTCACACAACCAGTACCATTCGCCGTCTTCGT	CLL-H-039639	MLLT10	Homo sapiens myeloid/lymphoid or mixed-lineage leukemia (trithorax homolog, Drosophila); translocated to, 10 (MLLT10), transcript variant 1, mRNA.	AF10; DKFZp686E10210; MGC75086	8028	NM_001009569.1	57546900	NP_004632.1	10	10p12.31b-p12.31a	8.14151	20.6515	14.3965	8.84589	61.4447	17.7952	87.6831	52.7391	49.4182	93.7031	1.23608	6.09058	3.66333	3.43266	0.393034	0		3.1289
6739	GTGTCAACACCAGTACCA	GCCGGGAGTTATTCAAATCTT	TAGAAGACGCACCGGGCCGGGAGTTATTTAAATCTTGTTAATATTCATAGCAAGATTTGAATAACTCCCGGCTTTTTTGGCAAGCAAAAGACGGCATACGAGATCCTGGTACTGGTGTTGACACTTCGCCGTCTTCGT	CLL-H-034213	FGF21	Homo sapiens fibroblast growth factor 21 (FGF21), mRNA.		26291	NM_019113.2	68215584	NP_061986.1	19	19q13.33a	0.141131	3.38481	1.76297	2.29363	130.1	2.94774	9.96118	6.45446	4.95925	76.8344	1.67203	5.65023	3.66113	2.81301	0.348561	0		3.12622
26528	ACACTGACACGTTGTGCA	TCCGAGTCTTGCGGCAATATT	TAGAAGACGCACCGGTCCGAGTCTTGTGGTAATATTGTTAATATTCATAGCAATATTGCCGCAAGACTCGGATTTTTTGGCAAGCAAAAGACGGCATACGAGATCCTGCACAACGTGTCAGTGTTTCGCCGTCTTCGT	CLL-H-054002	ZFHX3	Homo sapiens zinc finger homeobox 3 (ZFHX3), transcript variant A, mRNA.	ATBF1; ZFHX3; ATBT	463	NM_001164766.1	118498344	NP_008816.3	16	16q22.3b	51.2924	40.1712	45.7318	7.86385	17.1956	131.706	203.064	167.385	50.4574	30.1445	2.87997	4.44031	3.66014	1.10333	0.0779427	0		3.12502
24979	TGGTTGTGCAGTACTGAC	CGGCTGACTTAACCTTAGATT	TAGAAGACGCACCGGCGGCTGACTTAACTTTAGATTGTTAATATTCATAGCAATCTAAGGTTAAGTCAGCCGTTTTTTGGCAAGCAAAAGACGGCATACGAGATCCGTCAGTACTGCACAACCATTCGCCGTCTTCGT	CLL-H-052453	TRMT2B	Homo sapiens TRM2 tRNA methyltransferase 2 homolog B (S. cerevisiae) (TRMT2B), mRNA.	dJ341D10.3; FLJ12687	79979	NM_001167970.1	40255252	NP_079193.2	X	Xq22.1c	40.2842	34.1596	37.2219	4.33074	11.6349	242.536	29.8645	136.2	150.382	110.412	6.51597	0.802338	3.65915	4.04014	0.450375	0		3.12382
18579	ACCATGACTGACCAACAC	CAGAGCCCACAGGCTATAATT	TAGAAGACGCACCGGCAGAGCCTACAGGTTATAATTGTTAATATTCATAGCAATTATAGCCTGTGGGCTCTGTTTTTTGGCAAGCAAAAGACGGCATACGAGATCCGTGTTGGTCAGTCATGGTTTCGCCGTCTTCGT	CLL-H-046053	PVR	Homo sapiens poliovirus receptor (PVR), mRNA.	Necl-5; HVED; NECL5; TAGE4; PVS; CD155	5817	NM_001135768.1	19923371	NP_006496.2	19	19q13.31b	45.1797	35.9247	40.5522	6.54427	16.1379	139.16	156.651	147.906	12.368	8.36207	3.43163	3.86295	3.64729	0.304989	0.00838778	0		3.10943
12377	ACACTGGTGTACTGTGTG	GCCATACTGTTGAAAGCAGTA	TAGAAGACGCACCGGGCCATACTGTTGAAAGTAGTAGTTAATATTCATAGCTACTGCTTTCAACAGTATGGCTTTTTTGGCAAGCAAAAGACGGCATACGAGATCCCACACAGTACACCAGTGTTTCGCCGTCTTCGT	CLL-H-039851	MOSPD2	Homo sapiens motile sperm domain containing 2 (MOSPD2), mRNA.	MGC26706	158747	NM_152581.2	141801490	NP_689794.1	X	Xp22.2	22.1223	28.8436	25.4829	4.75262	18.6502	120.217	64.9758	92.5965	39.0615	42.1847	4.71755	2.54978	3.63366	1.53285	0.137342	0		3.09289
10556	ACTGGTACACCAGTTGCA	CTCTCTCGAGGCTACTTCTTT	TAGAAGACGCACCGGCTCTCTTGAGGCTATTTCTTTGTTAATATTCATAGCAAAGAAGTAGCCTCGAGAGAGTTTTTTGGCAAGCAAAAGACGGCATACGAGATCCTGCAACTGGTGTACCAGTTTCGCCGTCTTCGT	CLL-H-038030	KSR1	Homo sapiens kinase suppressor of ras 1 (KSR1), mRNA.	RSU2; KSR	8844	NM_014238.1	75677324	NP_055053.1	17	17q11.1b-q11.1c	7.05656	13.1862	10.1214	4.33432	42.8234	33.899	39.6071	36.7531	4.03621	10.982	3.34925	3.91321	3.63123	0.39878	0.0238476	0		3.08993
20362	GTTGACGTGTACGTACGT	GATGGCACAGTACATTGATTA	TAGAAGACGCACCGGGATGGCACAGTATATTGATTAGTTAATATTCATAGCTAATCAATGTACTGTGCCATCTTTTTTGGCAAGCAAAAGACGGCATACGAGATCCACGTACGTACACGTCAACTTCGCCGTCTTCGT	CLL-H-047836	SAR1B	Homo sapiens SAR1 homolog B (S. cerevisiae) (SAR1B), transcript variant 1, mRNA.	CMRD; SARA2; GTBPB	51128	NM_001033503.2	75709203	NP_001028675.1	5	5q31.1e	35.3093	33.059	34.1841	1.5912	4.65478	79.3958	168.76	124.078	63.1902	50.9278	2.32259	4.9368	3.6297	1.84853	0.181986	0		3.08807
5897	ACGTACTGGTGTCAACCA	GCAGCTAAGAAATTATGGAAA	TAGAAGACGCACCGGGCAGCTAAGAAATTATGGAAAGTTAATATTCATAGCTTTCCATAATTTCTTAGCTGCTTTTTTGGCAAGCAAAAGACGGCATACGAGATCCTGGTTGACACCAGTACGTTTCGCCGTCTTCGT	CLL-H-033371	EPB41	Homo sapiens erythrocyte membrane protein band 4.1 (elliptocytosis 1, RH-linked) (EPB41), transcript variant 1, mRNA.	HE; EL1; 4.1R	2035	NM_001166005.1	42716288	NP_976218.1	1	1p35.3a	3.2372	8.25437	5.74578	3.54767	61.7439	21.8302	19.8558	20.843	1.3961	6.69817	3.79935	3.45572	3.62753	0.242978	0.0304372	0		3.08545
12862	CAGTCAGTCATGTGACAC	CCAGACCAAGTTTGGAGACTA	TAGAAGACGCACCGGCCAGACTAAGTTTGGAGATTAGTTAATATTCATAGCTAGTCTCCAAACTTGGTCTGGTTTTTTGGCAAGCAAAAGACGGCATACGAGATCCGTGTCACATGACTGACTGTTCGCCGTCTTCGT	CLL-H-040336	MYLIP	Homo sapiens myosin regulatory light chain interacting protein (MYLIP), mRNA.	MIR	29116	NM_013262.3	38788242	NP_037394.2	6	6p22.3f	12.6577	5.9909	9.32431	4.71415	50.5576	34.2735	33.3243	33.7989	0.671199	1.98586	3.67572	3.57392	3.62482	0.0719838	0.0184051	0		3.08216
16371	CATGTGTGCAACCACAGT	GCAGCTCAGTAAATCTTCAGA	TAGAAGACGCACCGGGCAGCTCAGTAAATCTTTAGAGTTAATATTCATAGCTCTGAAGATTTACTGAGCTGCTTTTTTGGCAAGCAAAAGACGGCATACGAGATCCACTGTGGTTGCACACATGTTCGCCGTCTTCGT	CLL-H-043845	PCTK2	Homo sapiens PCTAIRE protein kinase 2 (PCTK2), mRNA.	PCTAIRE2	5128	NM_001170464.1	37595544	NP_002586.2	12	12q23.1a	7.26826	5.3887	6.32848	1.32905	21.0011	14.8112	31.0241	22.9177	11.4643	50.0238	2.3404	4.9023	3.62135	1.81154	0.179112	0		3.07795
22176	CAACCAGTACGTCAACCA	GTGGATTACAAGAACCTCATT	TAGAAGACGCACCGGGTGGATTACAAGAACCTTATTGTTAATATTCATAGCAATGAGGTTCTTGTAATCCACTTTTTTGGCAAGCAAAAGACGGCATACGAGATCCTGGTTGACGTACTGGTTGTTCGCCGTCTTCGT	CLL-H-049650	SLITRK1	Homo sapiens SLIT and NTRK-like family, member 1 (SLITRK1), mRNA.	KIAA0918; KIAA1910; RP11-395N17.1; LRRC12	114798	NM_052910.1	40217816	NP_443142.1	13	13q31.1d	11.4052	7.23685	9.32101	2.94745	31.6216	32.099	35.3489	33.7239	2.29802	6.81423	3.44372	3.79239	3.61806	0.246542	0.0115259	0		3.07395
22504	GTCACAACTGACTGTGGT	CTTTACCACCAAGTTAGTAAA	TAGAAGACGCACCGGCTTTACCACCAAGTTAGTAAAGTTAATATTCATAGCTTTACTAACTTGGTGGTAAAGTTTTTTGGCAAGCAAAAGACGGCATACGAGATCCACCACAGTCAGTTGTGACTTCGCCGTCTTCGT	CLL-H-049978	SPC24	Homo sapiens SPC24, NDC80 kinetochore complex component, homolog (S. cerevisiae) (SPC24), mRNA.	SPBC24; FLJ90806	147841	NM_182513.2	32698865	NP_872319.1	19	19p13.2b	23.7453	31.6885	27.7169	5.61663	20.2643	54.6299	145.901	100.265	64.5383	64.3675	1.971	5.26397	3.61748	2.32848	0.254097	0		3.07325
19901	CACACAGTTGTGTGACAC	CCAAACGCATTGATGGATTTA	TAGAAGACGCACCGGCCAAACGTATTGATGGATTTAGTTAATATTCATAGCTAAATCCATCAATGCGTTTGGTTTTTTGGCAAGCAAAAGACGGCATACGAGATCCGTGTCACACAACTGTGTGTTCGCCGTCTTCGT	CLL-H-047375	RORA	Homo sapiens RAR-related orphan receptor A (RORA), transcript variant 1, mRNA.	NR1F1; MGC119326; ROR2; RZRA; ROR1; MGC119329; ROR3	6095	NM_002943.3	19743902	NP_599023.1	15	15q22.2a-q22.2b	48.0464	18.2427	33.1445	21.0744	63.5834	15.077	224.678	119.877	148.21	123.635	0.454886	6.77873	3.61681	4.47163	0.498687	0		3.07243
20937	ACTGTGACTGACACACTG	TGGAACTGTCGAATGGTGAAA	TAGAAGACGCACCGGTGGAACTGTTGAATGGTGAAAGTTAATATTCATAGCTTTCACCATTCGACAGTTCCATTTTTTGGCAAGCAAAAGACGGCATACGAGATCCCAGTGTGTCAGTCACAGTTTCGCCGTCTTCGT	CLL-H-048411	SFRS3	Homo sapiens splicing factor, arginine/serine-rich 3 (SFRS3), mRNA.	SRp20	6428	NM_003017.4	31377552	NP_003008.1	6	6p21.31a	64.2059	86.1777	75.1918	15.5364	20.6623	307.012	236.046	271.529	50.1809	18.4809	4.08306	3.13925	3.61115	0.667372	0.033979	0		3.06557
25136	GTTGGTACACGTCAACTG	GCAAGTGCAATACTGACTATA	TAGAAGACGCACCGGGCAAGTGCAATACTGATTATAGTTAATATTCATAGCTATAGTCAGTATTGCACTTGCTTTTTTGGCAAGCAAAAGACGGCATACGAGATCCCAGTTGACGTGTACCAACTTCGCCGTCTTCGT	CLL-H-052610	TSHB	Homo sapiens thyroid stimulating hormone, beta (TSHB), mRNA.	TSH-BETA	7252	NM_000549.3	115430098	NP_000540.2	1	1p13.2a	23.7983	45.2485	34.5234	15.1676	43.9342	209.362	39.6926	124.527	119.975	96.3438	6.06436	1.14973	3.60705	3.47517	0.402946	0		3.06059
3505	TGGTCAACGTGTTGACAC	CTTCGACGAACACTACGAGTA	TAGAAGACGCACCGGCTTCGATGAACACTATGAGTAGTTAATATTCATAGCTACTCGTAGTGTTCGTCGAAGTTTTTTGGCAAGCAAAAGACGGCATACGAGATCCGTGTCAACACGTTGACCATTCGCCGTCTTCGT	CLL-H-030979	CKS2	Homo sapiens CDC28 protein kinase regulatory subunit 2 (CKS2), mRNA.	CKSHS2	1164	NM_001827.1	4502858	NP_001818.1	9	9q22.2a	10.1879	1.19403	5.69097	6.35964	111.75	17.2032	23.8099	20.5066	4.67162	22.7811	3.0229	4.1838	3.60335	0.820882	0.117386	0		3.0561
8268	TGGTACTGGTACTGTGCA	GTGTGTCAACCTGTCTATCAA	TAGAAGACGCACCGGGTGTGTCAACCTGTCTATTAAGTTAATATTCATAGCTTGATAGACAGGTTGACACACTTTTTTGGCAAGCAAAAGACGGCATACGAGATCCTGCACAGTACCAGTACCATTCGCCGTCTTCGT	CLL-H-035742	GSDMD	Homo sapiens gasdermin D (GSDMD), mRNA.	FLJ12150; FKSG10; DF5L	79792	NM_001166237.1	83320069	NP_079012.3	8	8q24.3g	23.7453	22.9876	23.3665	0.535783	2.29295	91.5854	76.6574	84.1214	10.5557	12.5482	3.91952	3.28065	3.60009	0.451746	0.0147971	0		3.05214
16234	CACACAGTACACACTGGT	GAACATCATCGCGCTGTCTAT	TAGAAGACGCACCGGGAACATCATCGTGCTGTTTATGTTAATATTCATAGCATAGACAGCGCGATGATGTTCTTTTTTGGCAAGCAAAAGACGGCATACGAGATCCACCAGTGTGTACTGTGTGTTCGCCGTCTTCGT	CLL-H-043708	PCDH19	Homo sapiens protocadherin 19 (PCDH19), mRNA.	DKFZp686P1843; KIAA1313	57526	NM_001105243.1	58037112	NP_065817.1	X	Xq22.1b	2.83145	9.41724	6.12435	4.65686	76.0385	16.6233	27.4028	22.013	7.6222	34.6258	2.7143	4.4744	3.59435	1.24457	0.128303	0		3.04518
25953	CAGTCATGGTCAACACGT	CGTCATGAGCAGCGAGCGCTA	TAGAAGACGCACCGGCGTCATGAGCAGTGAGCGTTAGTTAATATTCATAGCTAGCGCTCGCTGCTCATGACGTTTTTTGGCAAGCAAAAGACGGCATACGAGATCCACGTGTTGACCATGACTGTTCGCCGTCTTCGT	CLL-H-053427	UTS2R	Homo sapiens urotensin 2 receptor (UTS2R), mRNA.	UTR; UTR2; GPR14	2837	NM_018949.1	9506744	NP_061822.1	17	17q25.3g	7.77104	5.93899	6.85502	1.29546	18.8979	6.40288	42.8008	24.6018	25.7372	104.615	0.934044	6.24371	3.58888	3.7545	0.432818	0		3.03854
23386	TGGTTGTGACACCACAAC	GCCATGAGGAATGTCACTTGT	TAGAAGACGCACCGGGCCATGAGGAGTGTCATTTGTGTTAATATTCATAGCACAAGTGACATTCCTCATGGCTTTTTTGGCAAGCAAAAGACGGCATACGAGATCCGTTGTGGTGTCACAACCATTCGCCGTCTTCGT	CLL-H-050860	TAL2	Homo sapiens T-cell acute lymphocytic leukemia 2 (TAL2), mRNA.		6887	NM_005421.2	4885618	NP_005412.1	9	9q31.2a	17.5091	15.7196	16.6144	1.26534	7.61596	72.4734	46.7453	59.6094	18.1925	30.5195	4.36209	2.81355	3.58782	1.09499	0.0793886	0		3.03725
26309	CATGGTGTCAACTGTGGT	GATACTGTGTTTGCTGTTGAA	TAGAAGACGCACCGGGATACTGTGTTTGTTGTTGAAGTTAATATTCATAGCTTCAACAGCAAACACAGTATCTTTTTTGGCAAGCAAAAGACGGCATACGAGATCCACCACAGTTGACACCATGTTCGCCGTCTTCGT	CLL-H-053783	XPO5	Homo sapiens exportin 5 (XPO5), mRNA.	FLJ45606; FLJ14239; FLJ32057; KIAA1291	57510	NM_020750.2	22748936	NP_065801.1	6	6p21.1c	49.6606	37.3575	43.509	8.69959	19.9949	29.7795	281.784	155.781	178.194	114.387	0.684443	6.47644	3.58044	4.09556	0.467381	0		3.02829
3936	ACTGTGCAACACGTACAC	CAATGACATCCCGTTGTACCT	TAGAAGACGCACCGGCAATGACATCCTGTTGTATCTGTTAATATTCATAGCAGGTACAACGGGATGTCATTGTTTTTTGGCAAGCAAAAGACGGCATACGAGATCCGTGTACGTGTTGCACAGTTTCGCCGTCTTCGT	CLL-H-031410	COX7A1	Homo sapiens cytochrome c oxidase subunit VIIa polypeptide 1 (muscle) (COX7A1), mRNA.	COX7AH; COX7A; COX7AM	1346	NM_001864.2	18105034	NP_001855.1	19	19q13.12b	29.5317	39.3614	34.4466	6.95062	20.178	14.1588	231.483	122.821	153.672	125.118	0.411038	6.72007	3.56556	4.46116	0.501855	0		3.01023
17067	ACCAGTCACAACACACTG	CACAGACGGAACCTCAGATTT	TAGAAGACGCACCGGCACAGATGGAACCTTAGATTTGTTAATATTCATAGCAAATCTGAGGTTCCGTCTGTGTTTTTTGGCAAGCAAAAGACGGCATACGAGATCCCAGTGTGTTGTGACTGGTTTCGCCGTCTTCGT	CLL-H-044541	PKIB	Homo sapiens protein kinase (cAMP-dependent, catalytic) inhibitor beta (PKIB), transcript variant 3, mRNA.	PRKACN2; FLJ23817	5570	NM_032471.4	32483388	NP_115860.1	6	6q22.31c	58.4019	23.7352	41.0685	24.5131	59.6882	234.019	58.6075	146.313	124.035	84.7734	5.69826	1.42706	3.56266	3.02019	0.360235	0		3.00672
9263	TGACGTACTGTGCAACGT	ACGAGTTGATTTGAACGTCTT	TAGAAGACGCACCGGACGAGTTGATTTGAATGTCTTGTTAATATTCATAGCAAGACGTTCAAATCAACTCGTTTTTTTGGCAAGCAAAAGACGGCATACGAGATCCACGTTGCACAGTACGTCATTCGCCGTCTTCGT	CLL-H-036737	ING1	Homo sapiens inhibitor of growth family, member 1 (ING1), transcript variant 3, mRNA.	p33ING1; p33; p47ING1a; p33ING1b; p47; p24ING1c	3621	NM_005537.3	38201662	NP_937860.1	13	13q34a	12.005	19.852	15.9285	5.54869	34.835	33.3312	80.1552	56.7432	33.1095	58.3498	2.09255	5.03219	3.56237	2.07864	0.22769	0		3.00636
2039	CATGACACGTCAACTGAC	GTATCAATCAGCCGGTTGCTT	TAGAAGACGCACCGGGTATCAATCAGCTGGTTGTTTGTTAATATTCATAGCAAGCAACCGGCTGATTGATACTTTTTTGGCAAGCAAAAGACGGCATACGAGATCCGTCAGTTGACGTGTCATGTTCGCCGTCTTCGT	CLL-H-029513	C14ORF156	Homo sapiens chromosome 14 open reading frame 156 (C14orf156), mRNA.	DC50; SLIRP; PD04872	81892	NM_031210.4	33667026	NP_112487.1	14	14q24.3d	14.0955	13.778	13.9368	0.224469	1.61062	22.253	76.8855	49.5693	38.631	77.9333	1.59671	5.51674	3.55673	2.77188	0.322002	0		2.99951
16621	GTGTCAACGTGTCAACAC	GCCTTCAAACAAGCTAGAAAT	TAGAAGACGCACCGGGCCTTCAAACAAGTTAGAAATGTTAATATTCATAGCATTTCTAGCTTGTTTGAAGGCTTTTTTGGCAAGCAAAAGACGGCATACGAGATCCGTGTTGACACGTTGACACTTCGCCGTCTTCGT	CLL-H-044095	PEX3	Homo sapiens peroxisomal biogenesis factor 3 (PEX3), mRNA.	TRG18	8504	NM_003630.2	4505726	NP_003621.1	6	6q24.2a-q24.2b	16.3271	2.7826	9.55487	9.57742	100.236	42.0174	25.7774	33.8974	11.4834	33.877	4.39749	2.69783	3.54766	1.20184	0.147922	0		2.98851
22408	CAGTACGTGTACTGACCA	CCTGTCTCTTCTGGTGACATT	TAGAAGACGCACCGGCCTGTTTCTTCTGGTGATATTGTTAATATTCATAGCAATGTCACCAGAAGAGACAGGTTTTTTGGCAAGCAAAAGACGGCATACGAGATCCTGGTCAGTACACGTACTGTTCGCCGTCTTCGT	CLL-H-049882	SP110	Homo sapiens SP110 nuclear body protein (SP110), transcript variant c, mRNA.	FLJ22835; IFI75; VODI; IFI41	3431	NM_004509.3	17986253	NP_536349.1	2	2q37.1a	0.149952	9.54184	4.8459	6.64107	137.045	14.2796	20.0839	17.1818	4.10426	23.8873	2.94675	4.14453	3.54564	0.846957	0.155002	0		2.98605
11343	CACAGTGTCACACAACGT	CCTGCTTAAATCCAGGGTAAT	TAGAAGACGCACCGGCCTGCTTAAATCTAGGGTAATGTTAATATTCATAGCATTACCCTGGATTTAAGCAGGTTTTTTGGCAAGCAAAAGACGGCATACGAGATCCACGTTGTGTGACACTGTGTTCGCCGTCTTCGT	CLL-H-038817	LYST	Homo sapiens lysosomal trafficking regulator (LYST), mRNA.	CHS1; CHS	1130	NM_000081.2	54292122	NP_000072.2	1	1q42.3c	22.6869	25.3342	24.0105	1.87192	7.79626	76.0131	94.194	85.1035	12.8558	15.1061	3.16583	3.92303	3.54443	0.535425	0.0218709	0		2.98459
22476	TGTGCATGACACACTGTG	CGAGAACTTCAACCTTCTATA	TAGAAGACGCACCGGCGAGAACTTCAACTTTCTATAGTTAATATTCATAGCTATAGAAGGTTGAAGTTCTCGTTTTTTGGCAAGCAAAAGACGGCATACGAGATCCCACAGTGTGTCATGCACATTCGCCGTCTTCGT	CLL-H-049950	SPAST	Homo sapiens spastin (SPAST), transcript variant 1, mRNA.	FSP2; ADPSP; KIAA1083; SPG4	6683	NM_014946.3	40806168	NP_055761.2	2	2p22.3e	13.2311	30.2764	21.7537	12.0529	55.406	113.331	40.7572	77.0441	51.3175	66.6079	5.20973	1.87357	3.54165	2.35902	0.276231	0		2.98122
14020	GTGTACTGACTGCAACGT	AGAAGGAACTTCTGAGTAATT	TAGAAGACGCACCGGAGAAGGAACTTCTGAGTAATTGTTAATATTCATAGCAATTACTCAGAAGTTCCTTCTTTTTTTGGCAAGCAAAAGACGGCATACGAGATCCACGTTGCAGTCAGTACACTTCGCCGTCTTCGT	CLL-H-041494	NUP85	Homo sapiens nucleoporin 85kDa (NUP85), mRNA.	Nup75; FLJ12549	79902	NM_024844.3	82880675	NP_079120.1	17	17q25.1c	19.6349	30.7955	25.2152	7.89176	31.2976	97.2272	81.3338	89.2805	11.2383	12.5877	3.85589	3.22558	3.54074	0.445696	0.0222106	0		2.98011
25418	ACGTGTACTGTGGTTGCA	CCTACTAGGAGGCTTGTCATA	TAGAAGACGCACCGGCCTATTAGGAGGCTTGTTATAGTTAATATTCATAGCTATGACAAGCCTCCTAGTAGGTTTTTTGGCAAGCAAAAGACGGCATACGAGATCCTGCAACCACAGTACACGTTTCGCCGTCTTCGT	CLL-H-052892	TUSC4	Homo sapiens tumor suppressor candidate 4 (TUSC4), mRNA.	NPR2L; NPRL2	10641	NM_006545.4	50592991	NP_006536.3	3	3p21.31b	8.82953	6.1778	7.50366	1.87506	24.9886	27.0371	25.9675	26.5023	0.756306	2.85374	3.60319	3.46064	3.53192	0.100792	0.00561499	0		2.9694
6732	CAACCACAACCATGTGGT	GCGAGTACCAACTCTACAGCA	TAGAAGACGCACCGGGCGAGTACCAACTTTACAGTAGTTAATATTCATAGCTGCTGTAGAGTTGGTACTCGCTTTTTTGGCAAGCAAAAGACGGCATACGAGATCCACCACATGGTTGTGGTTGTTCGCCGTCTTCGT	CLL-H-034206	FGF17	Homo sapiens fibroblast growth factor 17 (FGF17), mRNA.	FGF-13	8822	NM_003867.2	61743927	NP_003858.1	8	8p21.3b	4.2604	12.1168	8.18859	5.5553	67.842	46.7048	11.1303	28.9175	25.155	86.9886	5.70364	1.35924	3.53144	3.07195	0.373093	0		2.96883
24560	CAACTGTGACTGCAACGT	GCCGAAGCCGACAAGAAGCAA	TAGAAGACGCACCGGGCCGAAGCCGATAAGAAGTAAGTTAATATTCATAGCTTGCTTCTTGTCGGCTTCGGCTTTTTTGGCAAGCAAAAGACGGCATACGAGATCCACGTTGCAGTCACAGTTGTTCGCCGTCTTCGT	CLL-H-052034	TPM2	Homo sapiens tropomyosin 2 (beta) (TPM2), transcript variant 2, mRNA.	AMCD1; TMSB; DA1	7169	NM_003289.3	47519615	NP_998839.1	9	9p13.3a	4.93077	29.3212	17.126	17.2466	100.704	64.8141	56.0506	60.4324	6.19669	10.2539	3.78455	3.27285	3.5287	0.36183	0.0790642	0		2.96549
12434	GTCAGTTGTGCATGTGTG	GAGTCTCGCAAGGATAAGAAA	TAGAAGACGCACCGGGAGTCTCGTAAGGATAAGAAAGTTAATATTCATAGCTTTCTTATCCTTGCGAGACTCTTTTTTGGCAAGCAAAAGACGGCATACGAGATCCCACACATGCACAACTGACTTCGCCGTCTTCGT	CLL-H-039908	MPZ	Homo sapiens myelin protein zero (Charcot-Marie-Tooth neuropathy 1B) (MPZ), mRNA.	CMT1B; CMT1; DSS; CMT2J; HMSNIB; P0; CMT2I; CMT4E; MPP; CMTDI3; CHM	4359	NM_000530.5	39725669	NP_000521.1	1	1q23.3a	42.1806	39.3614	40.771	1.9935	4.8895	67.5806	219.355	143.468	107.321	74.8047	1.65757	5.38017	3.51887	2.63228	0.308691	0		2.95357
16303	ACGTTGTGACACACTGCA	GCGGATAAACTTCAGTGATTT	TAGAAGACGCACCGGGCGGATAAACTTTAGTGATTTGTTAATATTCATAGCAAATCACTGAAGTTTATCCGCTTTTTTGGCAAGCAAAAGACGGCATACGAGATCCTGCAGTGTGTCACAACGTTTCGCCGTCTTCGT	CLL-H-043777	PCM1	Homo sapiens pericentriolar material 1 (PCM1), mRNA.	PTC4	5108	NM_006197.3	134142825	NP_006188.3	8	8p22a	8.51198	4.94224	6.72711	2.52419	37.5227	20.3684	26.9655	23.667	4.66486	19.7104	3.02781	4.00849	3.51815	0.693442	0.0456853	0		2.95269
21183	GTGTTGCAACCAGTTGGT	GCTTATGGCTACTGGTTCAAA	TAGAAGACGCACCGGGCTTATGGCTACTGGTTTAAAGTTAATATTCATAGCTTTGAACCAGTAGCCATAAGCTTTTTTGGCAAGCAAAAGACGGCATACGAGATCCACCAACTGGTTGCAACACTTCGCCGTCTTCGT	CLL-H-048657	SIGLEC16	Homo sapiens sialic acid binding Ig-like lectin 16 (gene/pseudogene) (SIGLEC16), non-coding RNA.	Siglec-P16	400709	NR_002825.1	84872113		19	19q13.33b	3.36951	8.79427	6.08189	3.83589	63.0706	5.44849	37.3449	21.3967	22.5542	105.41	0.895855	6.14035	3.5181	3.70842	0.443722	0		2.95263
27241	CATGGTTGGTTGTGTGGT	TGGGCATCAGAATCCATATAG	TAGAAGACGCACCGGTGGGCATCAGAATCTATATAGGTTAATATTCATAGCCTATATGGATTCTGATGCCCATTTTTTGGCAAGCAAAAGACGGCATACGAGATCCACCACACAACCAACCATGTTCGCCGTCTTCGT	CLL-H-054715	ZNF630	PREDICTED: Homo sapiens zinc finger protein 630, transcript variant 2 (ZNF630), mRNA.		57232	NM_001037735.2	89059576	XP_934569.1	X	Xp11.23e	29.9375	13.778	21.8578	11.4264	52.2764	65.3094	88.3009	76.8052	16.2575	21.1671	2.98793	4.0398	3.51386	0.743784	0.0596057	0		2.94749
11821	TGGTGTGTACTGCACAGT	CTCCTCAGGGATGACATCATC	TAGAAGACGCACCGGCTCCTTAGGGATGACATTATCGTTAATATTCATAGCGATGATGTCATCCCTGAGGAGTTTTTTGGCAAGCAAAAGACGGCATACGAGATCCACTGTGCAGTACACACCATTCGCCGTCTTCGT	CLL-H-039295	MEG3	Homo sapiens maternally expressed 3 (non-protein coding) (MEG3), transcript variant 1, non-coding RNA. XR_001346-XR_001372	PRO2160; FP504; GTL2; prebp1; FLJ31163; FLJ42589; PRO0518	55384	NR_002766.2	84872046		14	14q32.2b	3.40479	9.77026	6.58753	4.50107	68.3271	20.8275	25.4447	23.1361	3.26488	14.1116	3.16166	3.86256	3.51211	0.495616	0.0520806	0		2.94536
25066	TGGTTGCACAACTGACTG	GCGGCCTTAATCCAGAGTTAA	TAGAAGACGCACCGGGCGGCTTTAATCTAGAGTTAAGTTAATATTCATAGCTTAACTCTGGATTAAGGCCGCTTTTTTGGCAAGCAAAAGACGGCATACGAGATCCCAGTCAGTTGTGCAACCATTCGCCGTCTTCGT	CLL-H-052540	TRPS1	Homo sapiens trichorhinophalangeal syndrome I (TRPS1), mRNA.	MGC134928; GC79	7227	NM_014112.2	90652850	NP_054831.2	8	8q23.3e	14.6688	20.8176	17.7432	4.34784	24.5042	98.7011	25.8725	62.2868	51.4976	82.6782	5.56275	1.45816	3.51045	2.90238	0.347135	0		2.94335
9613	CAGTACCATGACCAACAC	CGAAGCTATTACCTGGTTTAA	TAGAAGACGCACCGGCGAAGCTATTACTTGGTTTAAGTTAATATTCATAGCTTAAACCAGGTAATAGCTTCGTTTTTTGGCAAGCAAAAGACGGCATACGAGATCCGTGTTGGTCATGGTACTGTTCGCCGTCTTCGT	CLL-H-037087	JMJD6	Homo sapiens jumonji domain containing 6 (JMJD6), transcript variant 2, mRNA.	PTDSR; PTDSR1; PSR; KIAA0585	23210	NM_001081461.1	125988388	NP_055982.2	17	17q25.2a	6.73902	5.79363	6.26632	0.668491	10.668	5.01358	38.9418	21.9777	23.9908	109.16	0.800083	6.21445	3.50727	3.82853	0.452288	0		2.93948
24596	CATGACGTCAGTGTTGTG	CTGGACCTCATTAAAGTGCAT	TAGAAGACGCACCGGCTGGACCTCATTAAAGTGTATGTTAATATTCATAGCATGCACTTTAATGAGGTCCAGTTTTTTGGCAAGCAAAAGACGGCATACGAGATCCCACAACACTGACGTCATGTTCGCCGTCTTCGT	CLL-H-052070	TPSB2	Homo sapiens tryptase beta 2 (gene/pseudogene) (TPSB2), mRNA.	tryptaseC; TPSB1; TPS2	64499	NM_024164.5	68508969	NP_077078.5	16	16p13.3e	57.9432	22.4062	40.1747	25.1285	62.548	39.0093	242.205	140.607	143.681	102.186	0.970991	6.02879	3.49989	3.57641	0.432887	0		2.93053
2503	GTCATGTGTGACCACAAC	GCTGGGAATCTCGTTGATGAC	TAGAAGACGCACCGGGCTGGGAATCTTGTTGATGATGTTAATATTCATAGCGTCATCAACGAGATTCCCAGCTTTTTTGGCAAGCAAAAGACGGCATACGAGATCCGTTGTGGTCACACATGACTTCGCCGTCTTCGT	CLL-H-029977	C9ORF11	Homo sapiens chromosome 9 open reading frame 11 (C9orf11), mRNA.	Afaf	54586	NM_001161585.1	65287602	NP_065692.1	9	9p21.2a	23.6395	37.1291	30.3843	9.53857	31.3931	171.778	40.5766	106.178	92.7738	87.3761	5.65353	1.33545	3.49449	3.05335	0.369321	0		2.92398
25086	ACACACTGGTACACACGT	CCTGCTCTACATGATCTGCTT	TAGAAGACGCACCGGCCTGCTCTATATGATCTGTTTGTTAATATTCATAGCAAGCAGATCATGTAGAGCAGGTTTTTTGGCAAGCAAAAGACGGCATACGAGATCCACGTGTGTACCAGTGTGTTTCGCCGTCTTCGT	CLL-H-052560	TRPV5	Homo sapiens transient receptor potential cation channel, subfamily V, member 5 (TRPV5), mRNA.	ECAC1; CAT2	56302	NM_019841.4	21361832	NP_062815.2	7	7q34f	58.7194	68.2984	63.5089	6.77334	10.6652	332.914	110.191	221.552	157.489	71.0843	5.242	1.73504	3.48852	2.47979	0.291978	0		2.91673
6179	GTGTTGACGTTGGTACGT	GCAGCACATCAGTTACTACAA	TAGAAGACGCACCGGGCAGCACATCAGTTATTACAAGTTAATATTCATAGCTTGTAGTAACTGATGTGCTGCTTTTTTGGCAAGCAAAAGACGGCATACGAGATCCACGTACCAACGTCAACACTTCGCCGTCTTCGT	CLL-H-033653	EYA4	Homo sapiens eyes absent homolog 4 (Drosophila) (EYA4), transcript variant 1, mRNA.	DFNA10; CMD1J	2070	NM_004100.4	98991759	NP_004091.3	6	6q23.2c	6.19214	11.9195	9.05582	4.04987	44.7211	9.59224	53.5889	31.5906	31.1103	98.4798	1.05923	5.91761	3.48842	3.43539	0.416611	0		2.91662
18465	TGTGACCAGTCAGTCAGT	GAGGAGGTAGCTAGGGTATAG	TAGAAGACGCACCGGGAGGAGGTAGTTAGGGTATGGGTTAATATTCATAGCCTATACCCTAGCTACCTCCTCTTTTTTGGCAAGCAAAAGACGGCATACGAGATCCACTGACTGACTGGTCACATTCGCCGTCTTCGT	CLL-H-045939	PTPN18	Homo sapiens protein tyrosine phosphatase, non-receptor type 18 (brain-derived) (PTPN18), mRNA.	BDP1	26469	NM_001142370.1	18375654	NP_055184.2	2	2q21.1b	22.9956	27.473	25.2343	3.16603	12.5465	100.936	74.975	87.9555	18.3572	20.871	3.99995	2.97115	3.48555	0.727471	0.041386	0		2.91313
20378	TGGTCATGCAGTTGTGTG	CGCTCTATCCTGTCCAAGTAT	TAGAAGACGCACCGGCGCTCTATTCTGTCTAAGTATGTTAATATTCATAGCATACTTGGACAGGATAGAGCGTTTTTTGGCAAGCAAAAGACGGCATACGAGATCCCACACAACTGCATGACCATTCGCCGTCTTCGT	CLL-H-047852	SART1	Homo sapiens squamous cell carcinoma antigen recognized by T cells (SART1), mRNA.	MGC2038; Snu66; SART1259; Ara1; HOMS1	9092	NM_005146.4	119393884	NP_005137.1	11	11q13.1d	35.8738	36.8799	36.3768	0.7114	1.95564	218.954	34.4934	126.724	130.434	102.927	6.01906	0.948225	3.48364	3.58562	0.430596	0		2.91081
2869	GTACCATGCAACCACAAC	CCAGCCAAGAGTATGAGAACA	TAGAAGACGCACCGGCCAGCTAAGAGTATGAGAATAGTTAATATTCATAGCTGTTCTCATACTCTTGGCTGGTTTTTTGGCAAGCAAAAGACGGCATACGAGATCCGTTGTGGTTGCATGGTACTTCGCCGTCTTCGT	CLL-H-030343	CCRK	Homo sapiens cell cycle related kinase (CCRK), transcript variant 2, mRNA.	p42; CDCH	23552	NM_001039803.2	89903016	NP_036251.2	9	9q22.1a	12.7812	13.7884	13.2848	0.712213	5.36111	50.4741	42.0499	46.262	5.9568	12.8762	3.79938	3.16526	3.48232	0.448392	0.0161478	0		2.90921
13318	GTGTCAGTTGGTGTACAC	GCGAGAAAGATATTGATGAAT	TAGAAGACGCACCGGGCGAGAAAGATATTGATGAATGTTAATATTCATAGCATTCATCAATATCTTTCTCGCTTTTTTGGCAAGCAAAAGACGGCATACGAGATCCGTGTACACCAACTGACACTTCGCCGTCTTCGT	CLL-H-040792	NELL1	Homo sapiens NEL-like 1 (chicken) (NELL1), mRNA.	FLJ45906; IDH3GL; NRP1	4745	NM_006157.3	45269146	NP_006148.1	11	11p15.1a	17.0857	24.6385	20.8621	5.34063	25.5997	114.467	30.6534	72.56	59.2649	81.677	5.48682	1.46934	3.47808	2.84079	0.344151	0		2.90406
3016	ACGTGTACCAGTGTACGT	CCTGTCACAATCAAAGTCTTA	TAGAAGACGCACCGGCCTGTCACAATTAAAGTCTTAGTTAATATTCATAGCTAAGACTTTGATTGTGACAGGTTTTTTGGCAAGCAAAAGACGGCATACGAGATCCACGTACACTGGTACACGTTTCGCCGTCTTCGT	CLL-H-030490	CDH20	Homo sapiens cadherin 20, type 2 (CDH20), mRNA.	FLJ37047; Cdh7; CDH7L3	28316	NM_031891.2	16306536	NP_114097.2	18	18q21.33a	10.5143	2.94873	6.73151	5.34965	79.4719	19.1966	27.5833	23.39	5.93035	25.3542	2.85175	4.09765	3.4747	0.880983	0.09828	0		2.89996
8791	CAGTCAGTCAACTGTGGT	GCACTCGGACTTTAAAGAAGA	TAGAAGACGCACCGGGCACTTGGACTTTAAAGAAGAGTTAATATTCATAGCTCTTCTTTAAAGTCCGAGTGCTTTTTTGGCAAGCAAAAGACGGCATACGAGATCCACCACAGTTGACTGACTGTTCGCCGTCTTCGT	CLL-H-036265	HMX2	Homo sapiens H6 family homeobox 2 (HMX2), mRNA.	Nkx5-2; H6L	3167	NM_005519.1	70608169	NP_005510.1	10	10q26.13c	6.9419	2.6061	4.774	3.06587	64.2203	20.9362	12.2043	16.5703	6.17437	37.2617	4.38547	2.55642	3.47095	1.29333	0.136619	0		2.8954
177	TGTGGTTGGTTGCACAGT	CGTGCGTGACATTAAGGAGAA	TAGAAGACGCACCGGCGTGTGTGATATTAAGGAGAAGTTAATATTCATAGCTTCTCCTTAATGTCACGCACGTTTTTTGGCAAGCAAAAGACGGCATACGAGATCCACTGTGCAACCAACCACATTCGCCGTCTTCGT	CLL-H-027651	ACTB	Homo sapiens actin, beta (ACTB), mRNA.	PS1TP5BP1; beta-actin	60	NM_001101.3	5016088	NP_001092.1	7	7p22.1c	6.88897	24.8981	15.8935	12.7344	80.1229	1.71549	108.138	54.9266	75.2519	137.004	0.107936	6.80389	3.45591	4.73475	0.544665	0		2.87716
13131	ACACCAGTGTCAACTGCA	GCAGTTAAGTCCAGTCACATT	TAGAAGACGCACCGGGCAGTTAAGTCCAGTCATATTGTTAATATTCATAGCAATGTGACTGGACTTAACTGCTTTTTTGGCAAGCAAAAGACGGCATACGAGATCCTGCAGTTGACACTGGTGTTTCGCCGTCTTCGT	CLL-H-040605	NDFIP2	Homo sapiens Nedd4 family interacting protein 2 (NDFIP2), mRNA.	FLJ25842; N4wbp5a; KIAA1165	54602	NM_001161407.1	55741474	NP_061953.1	13	13q31.1a	81.4592	67.8415	74.6504	9.62915	12.899	245.46	269.712	257.586	17.149	6.65756	3.28813	3.61301	3.45057	0.229724	0.00572957	0		2.87067
27015	TGGTACGTACACTGACCA	CCGCAAGTGTAGATGAGTATA	TAGAAGACGCACCGGCCGCAAGTGTAGGTGAGTGTAGTTAATATTCATAGCTATACTCATCTACACTTGCGGTTTTTTGGCAAGCAAAAGACGGCATACGAGATCCTGGTCAGTGTACGTACCATTCGCCGTCTTCGT	CLL-H-054489	ZNF431	Homo sapiens zinc finger protein 431 (ZNF431), mRNA.	KIAA1969; DKFZp313E0830	170959	NM_133473.2	32698774	NP_597730.1	19	19p12d	25.0332	18.793	21.9131	4.41249	20.1364	107.967	43.2095	75.5883	45.7906	60.5789	4.92707	1.97186	3.44946	2.08965	0.240711	0		2.86933
11733	GTCATGTGCAGTGTCAAC	CAGCCATCACCACCATTCATC	TAGAAGACGCACCGGCAGCCATCACTACCATTTATCGTTAATATTCATAGCGATGAATGGTGGTGATGGCTGTTTTTTGGCAAGCAAAAGACGGCATACGAGATCCGTTGACACTGCACATGACTTCGCCGTCTTCGT	CLL-H-039207	MCCC2	Homo sapiens methylcrotonoyl-Coenzyme A carboxylase 2 (beta) (MCCC2), mRNA.	MCCB	64087	NM_022132.4	14251210	NP_071415.1	5	5q13.2b	34.7977	14.2453	24.5215	14.5328	59.2654	155.578	13.5636	84.5708	100.419	118.74	6.34456	0.55313	3.44884	4.09516	0.49069	0		2.86858
17375	TGGTCATGGTTGGTACTG	CCACCAAGATCACTGTGCAAA	TAGAAGACGCACCGGCCACCAAGATTACTGTGTAAAGTTAATATTCATAGCTTTGCACAGTGATCTTGGTGGTTTTTTGGCAAGCAAAAGACGGCATACGAGATCCCAGTACCAACCATGACCATTCGCCGTCTTCGT	CLL-H-044849	PNLIPRP1	Homo sapiens pancreatic lipase-related protein 1 (PNLIPRP1), mRNA.	PLRP1	5407	NM_006229.2	142379758	NP_006220.1	10	10q25.3b	19.8554	35.4367	27.646	11.0176	39.8524	163.189	27.0321	95.1105	96.2775	101.227	5.9028	0.977791	3.44029	3.48251	0.42864	0		2.8582
16995	TGTGGTTGTGCATGTGTG	GCCCGTAAGCAGGGTGGCTTT	TAGAAGACGCACCGGGCCCGTGAGTAGGGTGGCTTTGTTAATATTCATAGCAAAGCCACCCTGCTTACGGGCTTTTTTGGCAAGCAAAAGACGGCATACGAGATCCCACACATGCACAACCACATTCGCCGTCTTCGT	CLL-H-044469	PISD	Homo sapiens phosphatidylserine decarboxylase (PISD), mRNA.	DJ858B16; DKFZP566G2246; dJ858B16.2; PSSC	23761	NM_014338.3	34147578	NP_055153.1	22	22q12.2c	17.3327	18.4919	17.9123	0.819656	4.57595	15.4152	107.796	61.6054	65.3227	106.034	0.860597	6.01797	3.43928	3.64682	0.444057	0		2.85698
14529	GTGTGTCACAGTACACTG	CTCAGTCACAATGCCCAAATT	TAGAAGACGCACCGGCTCAGTCACAATGCCTAAATTGTTAATATTCATAGCAATTTGGGCATTGTGACTGAGTTTTTTGGCAAGCAAAAGACGGCATACGAGATCCCAGTGTACTGTGACACACTTCGCCGTCTTCGT	CLL-H-042003	OR1E2	Homo sapiens olfactory receptor, family 1, subfamily E, member 2 (OR1E2), mRNA.	OR17-93; OST529; OR1E7; OR1E4; OR17-135	8388	NM_003554.1	11386152	NP_003545.1	17	17p13.3a	9.89683	22.6554	16.2761	9.02165	55.4288	17.2274	94.6407	55.9341	54.7395	97.8644	1.05845	5.8147	3.43657	3.36318	0.418462	0		2.85369
25799	GTGTTGACTGACGTACCA	CGAAATCAAGTTATCCGATAT	TAGAAGACGCACCGGCGAAATCAAGTTATCCGATATGTTAATATTCATAGCATATCGGATAACTTGATTTCGTTTTTTGGCAAGCAAAAGACGGCATACGAGATCCTGGTACGTCAGTCAACACTTCGCCGTCTTCGT	CLL-H-053273	UQCRFS1	Homo sapiens ubiquinol-cytochrome c reductase, Rieske iron-sulfur polypeptide 1 (UQCRFS1), mRNA.	RIS1	7386	NM_006003.2	5174742	NP_005994.1	19	19q12c	16.8564	10.9331	13.8948	4.18835	30.1434	46.7048	48.7794	47.7421	1.46693	3.07262	3.36133	3.51063	3.43598	0.105575	0.00848602	0		2.85296
9187	CATGCATGCAGTGTACTG	GCTGCTGCTAATGCTAGGAAT	TAGAAGACGCACCGGGCTGCTGTTAATGTTAGGAATGTTAATATTCATAGCATTCCTAGCATTAGCAGCAGCTTTTTTGGCAAGCAAAAGACGGCATACGAGATCCCAGTACACTGCATGCATGTTCGCCGTCTTCGT	CLL-H-036661	IGSF8	Homo sapiens immunoglobulin superfamily, member 8 (IGSF8), mRNA.	PGRL; CD81P3; EWI2; CD316	93185	NM_052868.2	141802780	NP_443100.1	1	1q23.2c	4.38389	11.1616	7.77273	4.79254	61.6584	43.1168	10.2653	26.6911	23.2295	87.0309	5.54719	1.32069	3.43394	2.98859	0.376444	0		2.85048
25538	CAACCATGTGGTACACTG	GCCATTACATTAGCATGTATT	TAGAAGACGCACCGGGCCATTACATTAGCATGTATTGTTAATATTCATAGCAATACATGCTAATGTAATGGCTTTTTTGGCAAGCAAAAGACGGCATACGAGATCCCAGTGTACCACATGGTTGTTCGCCGTCTTCGT	CLL-H-053012	UBAC2	Homo sapiens UBA domain containing 2 (UBAC2), mRNA.	FLJ30548; MGC90487; FLJ26351; FLJ42413; PHGDHL1; FLJ30001	337867	NM_001144072.1	31342615	NP_808882.1	13	13q32.3a	14.122	10.1129	12.1174	2.83483	23.3947	48.2753	34.8546	41.565	9.48987	22.8314	3.98396	2.87641	3.43018	0.783159	0.0521736	0		2.84593
25697	CAACGTTGCACAACTGCA	CCTGGCAGATGAGATCATCAT	TAGAAGACGCACCGGCCTGGTAGATGAGATCATTATGTTAATATTCATAGCATGATGATCTCATCTGCCAGGTTTTTTGGCAAGCAAAAGACGGCATACGAGATCCTGCAGTTGTGCAACGTTGTTCGCCGTCTTCGT	CLL-H-053171	UMOD	Homo sapiens uromodulin (UMOD), transcript variant 2, mRNA.	THGP; HNFJ; ADMCKD2; MCKD2; FJHN	7369	NM_001008389.1	56550048	NP_001008390.1	16	16p12.3a	16.8211	9.87409	13.3476	4.91227	36.8027	75.3607	16.1394	45.7501	41.8758	91.5317	5.64602	1.20916	3.42759	3.13733	0.39065	0		2.84278
23977	TGACTGTGTGTGTGTGCA	ATCTGTGTCGAGGGCAATATT	TAGAAGACGCACCGGATCTGTGTCGAGGGTAATATTGTTAATATTCATAGCAATATTGCCCTCGACACAGATTTTTTTGGCAAGCAAAAGACGGCATACGAGATCCTGCACACACACACAGTCATTCGCCGTCTTCGT	CLL-H-051451	TK2	Homo sapiens thymidine kinase 2, mitochondrial (TK2), nuclear gene encoding mitochondrial protein, mRNA.		7084	NM_001172643.1	92859640	NP_004605.3	16	16q21e	46.247	64.1141	55.1805	12.634	22.8957	170.486	205.069	187.777	24.4541	13.0229	3.0896	3.71633	3.40297	0.443165	0.0208732	0		2.8129
766	TGCAACACACCAACTGGT	CGTAACATGAACTCTCGTGTT	TAGAAGACGCACCGGCGTAACATGAACTCTTGTGTTGTTAATATTCATAGCAACACGAGAGTTCATGTTACGTTTTTTGGCAAGCAAAAGACGGCATACGAGATCCACCAGTTGGTGTGTTGCATTCGCCGTCTTCGT	CLL-H-028240	ANGPTL1	Homo sapiens angiopoietin-like 1 (ANGPTL1), mRNA.	KIAA0351; ANG3; ANGPT3; ARP1; dJ595C2.2; UNQ162; AngY	9068	NM_004673.3	38327520	NP_004664.1	1	1q25.2b	14.1749	13.6846	13.9297	0.346679	2.48877	46.9585	47.8194	47.3889	0.60872	1.28452	3.3711	3.4329	3.402	0.0436994	0.000219097	0		2.81172
5982	CACAGTCATGTGCAACAC	CCCGACTCAAATACAGGAAAT	TAGAAGACGCACCGGCCCGACTCAAATATAGGAAATGTTAATATTCATAGCATTTCCTGTATTTGAGTCGGGTTTTTTGGCAAGCAAAAGACGGCATACGAGATCCGTGTTGCACATGACTGTGTTCGCCGTCTTCGT	CLL-H-033456	ERAP2	Homo sapiens endoplasmic reticulum aminopeptidase 2 (ERAP2), mRNA.	LRAP; FLJ23633; FLJ23807; FLJ23701; L-RAP; ERAP2	64167	NM_001130140.1	141802345	NP_071745.1	5	5q15e	56.4084	62.3594	59.3839	4.20798	7.08606	29.7915	374.048	201.92	243.426	120.556	0.501677	6.29881	3.40024	4.09919	0.494765	0		2.80959
8043	GTCAGTGTGTGTACACGT	GCTTGCTATTAGTAACAGTTT	TAGAAGACGCACCGGGCTTGCTATTAGTAACAGTTTGTTAATATTCATAGCAAACTGTTACTAATAGCAAGCTTTTTTGGCAAGCAAAAGACGGCATACGAGATCCACGTGTACACACACTGACTTCGCCGTCTTCGT	CLL-H-035517	GPR21	Homo sapiens G protein-coupled receptor 21 (GPR21), mRNA.		2844	NM_005294.1	4885306	NP_005285.1	9	9q33.2b	32.4778	16.2492	24.3635	11.4754	47.1008	50.4499	115.219	82.8344	45.7986	55.2894	2.07072	4.72916	3.39994	1.8798	0.22198	0		2.80922
5290	CATGTGACTGGTGTACCA	CCCAAGATTATGTCCTCACTT	TAGAAGACGCACCGGCCCAAGATTATGTCCTTACTTGTTAATATTCATAGCAAGTGAGGACATAATCTTGGGTTTTTTGGCAAGCAAAAGACGGCATACGAGATCCTGGTACACCAGTCACATGTTCGCCGTCTTCGT	CLL-H-032764	DSC3	Homo sapiens desmocollin 3 (DSC3), transcript variant Dsc3a, mRNA.	DSC1; DSC4; CDHF3; DSC; HT-CP; DSC2	1825	NM_001941.3	13435367	NP_001932.1	18	18q12.1d	8.08859	9.3238	8.70619	0.873427	10.0322	38.0428	21.1295	29.5861	11.9595	40.4227	4.36962	2.42695	3.39829	1.37368	0.132832	0		2.80722
3324	GTCACAGTACTGTGACAC	CGAAGGTTTAAGCTCTTAGAA	TAGAAGACGCACCGGCGAAGGTTTAAGTTCTTAGAAGTTAATATTCATAGCTTCTAAGAGCTTAAACCTTCGTTTTTTGGCAAGCAAAAGACGGCATACGAGATCCGTGTCACAGTACTGTGACTTCGCCGTCTTCGT	CLL-H-030798	CHD4	Homo sapiens chromodomain helicase DNA binding protein 4 (CHD4), mRNA.	Mi-2b; Mi2-BETA; DKFZp686E06161	1108	NM_001273.2	51599155	NP_001264.2	12	12p13.31d	15.6038	11.7845	13.6942	2.70065	19.7211	29.864	63.1699	46.5169	23.5508	50.6284	2.18078	4.6129	3.39684	1.71977	0.189318	0		2.80546
24554	ACCAACACACACCAACAC	GATCAGACCTTGAAAGCATTA	TAGAAGACGCACCGGGATCAGACCTTGAAAGTATTAGTTAATATTCATAGCTAATGCTTTCAAGGTCTGATCTTTTTTGGCAAGCAAAAGACGGCATACGAGATCCGTGTTGGTGTGTGTTGGTTTCGCCGTCTTCGT	CLL-H-052028	TPM1	Homo sapiens tropomyosin 1 (alpha) (TPM1), transcript variant 3, mRNA.	TPM1-alpha; TMSA; HTM-alpha; TPM1-kappa; C15orf13	7168	NM_000366.5	63252895	NP_001018004.1	15	15q22.2b	48.1875	54.7799	51.4837	4.66153	9.05438	147.315	202.379	174.847	38.9366	22.2689	2.86138	3.93094	3.39616	0.756289	0.0469909	0		2.80464
16685	TGCACATGGTACTGACGT	GCACATCTCATCCCTGGAATA	TAGAAGACGCACCGGGCACATTTCATCCTTGGAATAGTTAATATTCATAGCTATTCCAGGGATGAGATGTGCTTTTTTGGCAAGCAAAAGACGGCATACGAGATCCACGTCAGTACCATGTGCATTCGCCGTCTTCGT	CLL-H-044159	PGBD1	Homo sapiens piggyBac transposable element derived 1 (PGBD1), mRNA.	dJ874C20.4; SCAND4; HUCEP-4	84547	NM_032507.2	25777740	NP_115896.1	6	6p22.1b	14.6336	14.6606	14.6471	0.019115	0.130504	50.3049	49.1691	49.737	0.803167	1.61483	3.43447	3.35692	3.3957	0.0548347	0.000261995	0		2.80407
11738	TGCAACCACAGTGTCAGT	CCTTCACTGCTTCCATCATGT	TAGAAGACGCACCGGCCTTCACTGTTTCCATTATGTGTTAATATTCATAGCACATGATGGAAGCAGTGAAGGTTTTTTGGCAAGCAAAAGACGGCATACGAGATCCACTGACACTGTGGTTGCATTCGCCGTCTTCGT	CLL-H-039212	MCEE	Homo sapiens methylmalonyl CoA epimerase (MCEE), mRNA.	GLOD2	84693	NM_032601.3	21314761	NP_115990.2	2	2p13.3c-p13.3b	11.9609	25.438	18.6994	9.52975	50.9628	94.9439	31.8891	63.4165	44.5865	70.3074	5.07737	1.70535	3.39136	2.38438	0.299789	0		2.79881
14754	TGGTACACACCAACACGT	CTGAGCATGATGGCATTTGAT	TAGAAGACGCACCGGCTGAGCATGATGGTATTTGATGTTAATATTCATAGCATCAAATGCCATCATGCTCAGTTTTTTGGCAAGCAAAAGACGGCATACGAGATCCACGTGTTGGTGTGTACCATTCGCCGTCTTCGT	CLL-H-042228	OR2S2	Homo sapiens olfactory receptor, family 2, subfamily S, member 2 (OR2S2), mRNA.	OST715; OR37A	56656	NM_019897.2	10092668	NP_063950.1	9	9p13.3a	37.4086	33.7858	35.5972	2.56172	7.19641	109.199	132.071	120.635	16.1728	13.4064	3.06764	3.71016	3.3889	0.454328	0.0180385	0		2.79582
2175	ACCAGTACGTGTTGTGAC	AGGACTTCATCCAGTACATTG	TAGAAGACGCACCGGAGGACTTCATCCAGTATATTGGTTAATATTCATAGCCAATGTACTGGATGAAGTCCTTTTTTTGGCAAGCAAAAGACGGCATACGAGATCCGTCACAACACGTACTGGTTTCGCCGTCTTCGT	CLL-H-029649	C19ORF26	Homo sapiens chromosome 19 open reading frame 26 (C19orf26), mRNA.	MGC40084; DOS	255057	NM_152769.2	148886715	NP_689982.2	19	19p13.3i	15.7979	11.8261	13.812	2.8085	20.3338	19.2087	74.3477	46.7782	38.9892	83.3491	1.39072	5.38284	3.38678	2.82285	0.355314	0		2.79325
20557	ACGTTGGTGTTGTGACTG	GCAGAAATTAAGCAAGGGATT	TAGAAGACGCACCGGGCAGAAATTAAGTAAGGGATTGTTAATATTCATAGCAATCCCTTGCTTAATTTCTGCTTTTTTGGCAAGCAAAAGACGGCATACGAGATCCCAGTCACAACACCAACGTTTCGCCGTCTTCGT	CLL-H-048031	SDCBP	Homo sapiens syndecan binding protein (syntenin) (SDCBP), transcript variant 2, mRNA.	MDA-9; SYCL; TACIP18; ST1	6386	NM_001007067.1	55749489	NP_001007068.1	8	8q12.1c	20.7639	17.8897	19.3268	2.03243	10.5161	93.5546	37.3164	65.4355	39.7664	60.7719	4.84067	1.93081	3.38574	2.05758	0.243154	0		2.79199
22269	CAGTGTGTCAACACTGAC	CACAGAACAAATTAGCCCATA	TAGAAGACGCACCGGCACAGAACAAATTAGCTCATAGTTAATATTCATAGCTATGGGCTAATTTGTTCTGTGTTTTTTGGCAAGCAAAAGACGGCATACGAGATCCGTCAGTGTTGACACACTGTTCGCCGTCTTCGT	CLL-H-049743	SMPX	Homo sapiens small muscle protein, X-linked (SMPX), mRNA.		23676	NM_014332.1	10047089	NP_055147.1	X	Xp22.12a	0.0264621	9.29265	4.65956	6.55218	140.618	14.3521	17.0234	15.6877	1.88884	12.0403	3.08015	3.65343	3.36679	0.40537	0.14946	0		2.76899
6354	CACATGGTACACCAACGT	CCCACCCATTACGGCGATCAA	TAGAAGACGCACCGGCCCACCCATTATGGCGATTAAGTTAATATTCATAGCTTGATCGCCGTAATGGGTGGGTTTTTTGGCAAGCAAAAGACGGCATACGAGATCCACGTTGGTGTACCATGTGTTCGCCGTCTTCGT	CLL-H-033828	FAM64A	Homo sapiens family with sequence similarity 64, member A (FAM64A), mRNA.	FLJ10491; FLJ10156	54478	NM_019013.1	9506604	NP_061886.1	17	17p13.2a	4.61323	6.04282	5.32802	1.01087	18.9727	12.987	22.8784	17.9327	6.99429	39.003	2.43749	4.29397	3.36573	1.31274	0.12774	0		2.7677
17723	CACAACCAGTCATGTGCA	CCAGCTTGCTTGTGTATAAGT	TAGAAGACGCACCGGCCAGCTTGTTTGTGTATAAGTGTTAATATTCATAGCACTTATACACAAGCAAGCTGGTTTTTTGGCAAGCAAAAGACGGCATACGAGATCCTGCACATGACTGGTTGTGTTCGCCGTCTTCGT	CLL-H-045197	PPP1R14A	Homo sapiens protein phosphatase 1, regulatory (inhibitor) subunit 14A (PPP1R14A), mRNA.	CPI-17; CPI17; PPP1INL	94274	NM_033256.1	15147249	NP_150281.1	19	19q13.2a	33.7745	43.4938	38.6341	6.87257	17.7888	116.508	143.021	129.765	18.7472	14.4471	3.01568	3.70193	3.35881	0.48525	0.0231726	0		2.7593
23382	CATGGTCACACAGTCAAC	CCCAGGTTCAAGCATGTACCT	TAGAAGACGCACCGGCCCAGGTTCAAGTATGTATCTGTTAATATTCATAGCAGGTACATGCTTGAACCTGGGTTTTTTGGCAAGCAAAAGACGGCATACGAGATCCGTTGACTGTGTGACCATGTTCGCCGTCTTCGT	CLL-H-050856	TAKR	PREDICTED: Homo sapiens aldo-keto reductase, truncated (tAKR), mRNA.		389932	NR_026743.1	89030770	XP_372302.3	10	10p15.1d	15.8155	13.7261	14.7708	1.47743	10.0023	35.2521	63.9493	49.6007	20.292	40.9106	2.3866	4.32943	3.35802	1.37379	0.136526	0		2.75834
2471	GTCAACCAGTACACTGGT	CAGGAATTAAGGGAGTCACTT	TAGAAGACGCACCGGCAGGAATTAAGGGAGTTACTTGTTAATATTCATAGCAAGTGACTCCCTTAATTCCTGTTTTTTGGCAAGCAAAAGACGGCATACGAGATCCACCAGTGTACTGGTTGACTTCGCCGTCTTCGT	CLL-H-029945	C7ORF31	Homo sapiens chromosome 7 open reading frame 31 (C7orf31), mRNA.		136895	NM_138811.3	38570063	NP_620166.3	7	7p15.2c	17.1122	14.8682	15.9902	1.5867	9.92293	22.1202	85.2023	53.6612	44.6058	83.1249	1.38336	5.32841	3.35588	2.78957	0.355018	0		2.75575
10877	CACACAACGTGTTGTGTG	CCTCTCAGAAACCTCTATAAA	TAGAAGACGCACCGGCCTCTCAGAAACCTTTATAAAGTTAATATTCATAGCTTTATAGAGGTTTCTGAGAGGTTTTTTGGCAAGCAAAAGACGGCATACGAGATCCCACACAACACGTTGTGTGTTCGCCGTCTTCGT	CLL-H-038351	LIMA1	Homo sapiens LIM domain and actin binding 1 (LIMA1), mRNA.	SREBP3; EPLIN; FLJ38853; MGC131726	51474	NM_001113546.1	54792736	NP_057441.1	12	12q13.13a	10.9465	4.50616	7.72633	4.55401	58.9414	20.5134	31.2998	25.9066	7.62713	29.4409	2.655	4.05106	3.35303	0.987161	0.101521	0		2.75229
10495	CAGTCAGTGTGTCAACAC	GCTAGATACCTTGGGCAATGA	TAGAAGACGCACCGGGCTAGATACTTTGGGTAATGAGTTAATATTCATAGCTCATTGCCCAAGGTATCTAGCTTTTTTGGCAAGCAAAAGACGGCATACGAGATCCGTGTTGACACACTGACTGTTCGCCGTCTTCGT	CLL-H-037969	KRT4	Homo sapiens keratin 4 (KRT4), mRNA.	CK4; CYK4; K4; FLJ31692	3851	NM_002272.2	109255248	NP_002263.2	12	12q13.13d	9.57929	0.0103828	4.79483	6.76624	141.115	7.92508	24.2186	16.0718	11.5213	71.686	1.65284	5.05098	3.35191	2.40285	0.355012	0		2.75092
11809	TGACTGTGCAACTGACAC	GCAAGATAAAGTCAGACCTAA	TAGAAGACGCACCGGGCAAGATAAAGTCAGATCTAAGTTAATATTCATAGCTTAGGTCTGACTTTATCTTGCTTTTTTGGCAAGCAAAAGACGGCATACGAGATCCGTGTCAGTTGCACAGTCATTCGCCGTCTTCGT	CLL-H-039283	MED6	Homo sapiens mediator complex subunit 6 (MED6), mRNA.	NY-REN-28	10001	NM_005466.2	42544154	NP_005457.2	14	14q24.2a	27.7499	37.2952	32.5226	6.74951	20.7533	172.962	44.3976	108.68	90.9091	83.6484	5.31823	1.36513	3.34168	2.79526	0.358865	0		2.73851
27406	CAGTCAACGTACTGACCA	CGCAATTCATACCTTGCCCAA	TAGAAGACGCACCGGCGCAATTCATACTTTGCCTAAGTTAATATTCATAGCTTGGGCAAGGTATGAATTGCGTTTTTTGGCAAGCAAAAGACGGCATACGAGATCCTGGTCAGTACGTTGACTGTTCGCCGTCTTCGT	CLL-H-054880	ZNF83	Homo sapiens zinc finger protein 83 (ZNF83), mRNA.	MGC33853; FLJ90585; HPF1; FLJ11015; ZNF816B; FLJ14876	55769	NM_001105549.1	21361788	NP_060770.2	19	19q13.41a	7.36529	19.9974	13.6813	8.93223	65.2877	73.9231	17.4036	45.6633	39.9654	87.5218	5.40321	1.27207	3.33764	2.92116	0.384491	0		2.73361
22237	CACAACGTACACCAACCA	GCTATGAATGTATTGACAGAA	TAGAAGACGCACCGGGCTATGAATGTATTGACAGAAGTTAATATTCATAGCTTCTGTCAATACATTCATAGCTTTTTTGGCAAGCAAAAGACGGCATACGAGATCCTGGTTGGTGTACGTTGTGTTCGCCGTCTTCGT	CLL-H-049711	SMC2	Homo sapiens structural maintenance of chromosomes 2 (SMC2), transcript variant 1, mRNA.	SMC2L1; hCAP-E; FLJ10093; CAPE; CAP-E	10592	NM_001042550.1	110347419	NP_001036015.1	9	9q31.1d	24.3099	5.60674	14.9583	13.2251	88.4132	64.0409	35.6911	49.866	20.0464	40.2005	4.2813	2.38604	3.33367	1.34015	0.176143	0		2.72879
26695	TGTGTGTGGTACCACAGT	CTCCAAGGAGGTGACATGTGA	TAGAAGACGCACCGGCTCCAAGGAGGTGATATGTGGGTTAATATTCATAGCTCACATGTCACCTCCTTGGAGTTTTTTGGCAAGCAAAAGACGGCATACGAGATCCACTGTGGTACCACACACATTCGCCGTCTTCGT	CLL-H-054169	ZNF135	Homo sapiens zinc finger protein 135 (ZNF135), mRNA.	ZNF61; pT3; pHZ-17; ZNF78L1	7694	NM_001164527.1	34419632	NP_003427.2	19	19q13.43c	10.2761	19.852	15.0641	6.77117	44.9492	47.7438	52.4578	50.1008	3.33331	6.65321	3.16938	3.48231	3.32585	0.221276	0.0224228	0		2.7193
14015	ACGTTGGTACCAGTACCA	GTTCACGTTTGGCACTGCAAA	TAGAAGACGCACCGGGTTCATGTTTGGCACTGTAAAGTTAATATTCATAGCTTTGCAGTGCCAAACGTGAACTTTTTTGGCAAGCAAAAGACGGCATACGAGATCCTGGTACTGGTACCAACGTTTCGCCGTCTTCGT	CLL-H-041489	NUP62	Homo sapiens nucleoporin 62kDa (NUP62), transcript variant 2, mRNA.	FLJ43869; DKFZp547L134; MGC841; p62; SNDI; IBSN; FLJ20822	23636	NM_012346.3	34335246	NP_057637.2	19	19q13.33b	16.2125	16.9967	16.6046	0.554561	3.3398	92.9505	17.4511	55.2008	53.3862	96.7127	5.59788	1.05098	3.32443	3.21515	0.414136	0		2.71758
11351	TGACGTGTACTGGTACCA	GCGGGCATTCTGACCCTCATT	TAGAAGACGCACCGGGCGGGTATTCTGACCCTTATTGTTAATATTCATAGCAATGAGGGTCAGAATGCCCGCTTTTTTGGCAAGCAAAAGACGGCATACGAGATCCTGGTACCAGTACACGTCATTCGCCGTCTTCGT	CLL-H-038825	LYZL1	Homo sapiens lysozyme-like 1 (LYZL1), mRNA.	PRO1278; LYC2; KAAG648; MGC33408; bA534G20.1	84569	NM_032517.4	73390142	NP_115906.3	10	10p11.23b	6.58907	3.32251	4.95579	2.3098	46.6082	10.8849	22.061	16.4729	7.90268	47.9737	2.1964	4.45156	3.32398	1.59463	0.186493	0		2.71703
10293	TGTGACCATGTGTGTGAC	TTGTGGATATCAGGGTATAAA	TAGAAGACGCACCGGTTGTGGATATCAGGGTATAAAGTTAATATTCATAGCTTTATACCCTGATATCCACAATTTTTTGGCAAGCAAAAGACGGCATACGAGATCCGTCACACACATGGTCACATTCGCCGTCTTCGT	CLL-H-037767	KLF4	Homo sapiens Kruppel-like factor 4 (gut) (KLF4), mRNA.	GKLF; EZF	9314	NM_004235.4	34916057	NP_004226.2	9	9q31.2b	52.9683	54.3854	53.6769	1.00199	1.86671	184.548	172.287	178.417	8.67014	4.85947	3.43813	3.2097	3.32392	0.161525	0.00243881	0		2.71695
16836	GTACTGGTCAACCATGTG	GTGCTCCTGTGATACCGAATT	TAGAAGACGCACCGGGTGCTCTTGTGATACTGAATTGTTAATATTCATAGCAATTCGGTATCACAGGAGCACTTTTTTGGCAAGCAAAAGACGGCATACGAGATCCCACATGGTTGACCAGTACTTCGCCGTCTTCGT	CLL-H-044310	PHLDB3	Homo sapiens pleckstrin homology-like domain, family B, member 3 (PHLDB3), mRNA.	MGC87511; FLJ40193	653583	NM_198850.3	157266263	NP_942147.3	19	19q13.31a	8.16797	9.53146	8.84971	0.964128	10.8944	28.6197	30.1592	29.3894	1.08859	3.70403	3.23397	3.40793	3.32095	0.123009	0.00249675	0		2.71335
12699	GTGTGTTGACCAGTACCA	GCTGGATAAAGACCACGCAAA	TAGAAGACGCACCGGGCTGGATAAAGATCACGTAAAGTTAATATTCATAGCTTTGCGTGGTCTTTATCCAGCTTTTTTGGCAAGCAAAAGACGGCATACGAGATCCTGGTACTGGTCAACACACTTCGCCGTCTTCGT	CLL-H-040173	MTSS1	Homo sapiens metastasis suppressor 1 (MTSS1), mRNA.	MIM; KIAA0429; MIMA; MIMB; FLJ44694	9788	NM_014751.4	30023852	NP_055566.2	8	8q24.13d	18.4088	29.2381	23.8235	7.65747	32.1425	15.5481	142.489	79.0184	89.7605	113.594	0.65264	5.98102	3.31683	3.76773	0.477571	0		2.70835
24390	TGGTTGCACACAACTGAC	GATCTAGTCTGCCCACTACAT	TAGAAGACGCACCGGGATCTAGTCTGCTCACTATATGTTAATATTCATAGCATGTAGTGGGCAGACTAGATCTTTTTTGGCAAGCAAAAGACGGCATACGAGATCCGTCAGTTGTGTGCAACCATTCGCCGTCTTCGT	CLL-H-051864	TNK1	Homo sapiens tyrosine kinase, non-receptor, 1 (TNK1), mRNA.	MGC46193	8711	NM_003985.3	4507610	NP_003976.1	17	17p13.1d	18.7969	25.0746	21.9358	4.43897	20.2363	102.011	43.3425	72.6769	41.485	57.0815	4.65045	1.97589	3.31317	1.89121	0.227585	0		2.70391
17229	ACACGTGTGTTGCACAGT	CGAGCTGCTTAATGACGAGTT	TAGAAGACGCACCGGCGAGCTGTTTAATGATGAGTTGTTAATATTCATAGCAACTCGTCATTAAGCAGCTCGTTTTTTGGCAAGCAAAAGACGGCATACGAGATCCACTGTGCAACACACGTGTTTCGCCGTCTTCGT	CLL-H-044703	PLK1	Homo sapiens polo-like kinase 1 (Drosophila) (PLK1), mRNA.	PLK; STPK13	5347	NM_005030.3	34147632	NP_005021.2	16	16p12.1c	54.0356	32.6229	43.3293	15.1411	34.9442	146.65	140.34	143.495	4.46164	3.10926	3.38455	3.23893	3.31174	0.102971	0.0121901	0		2.70218
23415	ACACTGCAGTACTGACCA	CCACCAGCCTAATTTCACCTT	TAGAAGACGCACCGGCCACCAGCTTAATTTCACTTTGTTAATATTCATAGCAAGGTGAAATTAGGCTGGTGGTTTTTTGGCAAGCAAAAGACGGCATACGAGATCCTGGTCAGTACTGCAGTGTTTCGCCGTCTTCGT	CLL-H-050889	TARBP2	Homo sapiens TAR (HIV-1) RNA binding protein 2 (TARBP2), transcript variant 2, mRNA.	TRBP1; TRBP; TRBP2	6895	NM_004178.4	85068511	NP_599151.2	12	12q13.13e	0.652732	0.353017	0.502875	0.211931	42.1439	2.87526	0.446732	1.66099	1.71723	103.385	5.71764	0.888357	3.303	3.41482	0.443766	0		2.69157
4140	GTCACAGTTGGTTGTGTG	AGTCAACCATGCTCGAAATAT	TAGAAGACGCACCGGAGTCAACCATGCTTGAAATATGTTAATATTCATAGCATATTTCGAGCATGGTTGACTTTTTTTGGCAAGCAAAAGACGGCATACGAGATCCCACACAACCAACTGTGACTTCGCCGTCTTCGT	CLL-H-031614	CRNKL1	Homo sapiens crooked neck pre-mRNA splicing factor-like 1 (Drosophila) (CRNKL1), mRNA.	HCRN; CRN; MSTP021; CLF; SYF3	51340	NM_016652.4	124256488	NP_057736.4	20	20p11.23b	58.1549	21.804	39.9794	25.704	64.293	118.308	145.644	131.976	19.3294	14.6461	2.95923	3.64298	3.3011	0.483483	0.0560199	0		2.68927
6741	ACCACAACACCAGTACTG	CCTGTATGGATCGCTCCACTT	TAGAAGACGCACCGGCCTGTATGGATTGCTCCATTTGTTAATATTCATAGCAAGTGGAGCGATCCATACAGGTTTTTTGGCAAGCAAAAGACGGCATACGAGATCCCAGTACTGGTGTTGTGGTTTCGCCGTCTTCGT	CLL-H-034215	FGF21	Homo sapiens fibroblast growth factor 21 (FGF21), mRNA.		26291	NM_019113.2	68215584	NP_061986.1	19	19q13.33a	58.4989	39.0291	48.764	13.7672	28.2323	175.814	145.673	160.743	21.3127	13.2589	3.60539	2.9873	3.29635	0.437059	0.0247221	0		2.68349
8052	GTTGCAGTGTGTACACCA	GCTATCACTTTGGACAGATAT	TAGAAGACGCACCGGGCTATCACTTTGGATAGATATGTTAATATTCATAGCATATCTGTCCAAAGTGATAGCTTTTTTGGCAAGCAAAAGACGGCATACGAGATCCTGGTGTACACACTGCAACTTCGCCGTCTTCGT	CLL-H-035526	GPR22	Homo sapiens G protein-coupled receptor 22 (GPR22), mRNA.	MGC129847	2845	NM_005295.2	91106201	NP_005286.2	7	7q22.3c	12.8606	12.7709	12.8157	0.0634162	0.49483	47.7679	36.6701	42.219	7.84737	18.5873	3.72728	2.86133	3.29431	0.612323	0.0338204	0		2.68102
2079	GTCAGTACTGGTTGTGTG	TTGCAAGAGAGTCATACTTTA	TAGAAGACGCACCGGTTGCAAGAGAGTCATACTTTAGTTAATATTCATAGCTAAAGTATGACTCTCTTGCAATTTTTTGGCAAGCAAAAGACGGCATACGAGATCCCACACAACCAGTACTGACTTCGCCGTCTTCGT	CLL-H-029553	C14ORF45	Homo sapiens chromosome 14 open reading frame 45 (C14orf45), mRNA.	FLJ23189	80127	NM_025057.2	13376590	NP_079333.1	14	14q24.3a	20.2347	15.73	17.9824	3.18529	17.7134	11.0178	107.197	59.1073	68.0088	115.06	0.6127	5.96122	3.28696	3.78197	0.482965	0		2.6721
17585	TGGTACACTGGTCAACCA	CACAACCAGATGGACATGTTT	TAGAAGACGCACCGGCACAACCAGATGGATATGTTTGTTAATATTCATAGCAAACATGTCCATCTGGTTGTGTTTTTTGGCAAGCAAAAGACGGCATACGAGATCCTGGTTGACCAGTGTACCATTCGCCGTCTTCGT	CLL-H-045059	PPAPDC2	Homo sapiens phosphatidic acid phosphatase type 2 domain containing 2 (PPAPDC2), mRNA.	bA6J24.6; FLJ46512; FLJ90191; PSDP; MGC15483	403313	NM_203453.2	66773039	NP_982278.3	9	9p24.1c	32.9012	36.5269	34.714	2.56371	7.38522	195.336	32.602	113.969	115.071	100.966	5.62701	0.939157	3.28308	3.31481	0.432867	0		2.6674
20940	TGTGACTGGTGTTGTGAC	CAGTTGACAGTGGCAATTAAA	TAGAAGACGCACCGGCAGTTGACAGTGGTAATTAAAGTTAATATTCATAGCTTTAATTGCCACTGTCAACTGTTTTTTGGCAAGCAAAAGACGGCATACGAGATCCGTCACAACACCAGTCACATTCGCCGTCTTCGT	CLL-H-048414	SFRS5	Homo sapiens splicing factor, arginine/serine-rich 5 (SFRS5), transcript variant 2, mRNA.	SRP40; HRS	6430	NM_001039465.1	86991439	NP_008856.2	14	14q24.2a	56.7612	44.8124	50.7868	8.44912	16.6364	172.225	160.738	166.482	8.12282	4.8791	3.39115	3.16496	3.27805	0.15994	0.00509212	0		2.66129
1076	GTTGGTTGCAACGTACTG	GCTCATCAACTCCTTGGCATT	TAGAAGACGCACCGGGCTCATCAACTTCTTGGTATTGTTAATATTCATAGCAATGCCAAGGAGTTGATGAGCTTTTTTGGCAAGCAAAAGACGGCATACGAGATCCCAGTACGTTGCAACCAACTTCGCCGTCTTCGT	CLL-H-028550	ARL4A	Homo sapiens ADP-ribosylation factor-like 4A (ARL4A), transcript variant 3, mRNA.	ARL4	10124	NM_001037164.1	81295812	NP_001032241.1	7	7p21.3a	44.4652	43.8675	44.1664	0.422594	0.956824	248.371	41.1659	144.769	146.516	101.207	5.62354	0.932065	3.2778	3.31738	0.433961	0		2.66099
389	CACAACCAACACCAACAC	CAGAACCTCTAAGCCCTGAAA	TAGAAGACGCACCGGCAGAACCTTTAAGCCTTGAAAGTTAATATTCATAGCTTTCAGGGCTTAGAGGTTCTGTTTTTTGGCAAGCAAAAGACGGCATACGAGATCCGTGTTGGTGTTGGTTGTGTTCGCCGTCTTCGT	CLL-H-027863	ADAMTSL4	Homo sapiens ADAMTS-like 4 (ADAMTSL4), transcript variant 2, mRNA.	TSRC1	54507	NM_019032.4	83281434	NP_079284.2	1	1q21.2b-q21.2c	25.0243	3.28098	14.1527	15.3749	108.636	44.337	48.3992	46.3681	2.87242	6.19483	3.13276	3.41979	3.27628	0.20296	0.10042	0		2.65914
214	CAGTCATGGTCATGTGAC	GCGCTTATTCCTGTAGCATTA	TAGAAGACGCACCGGGCGCTTATTCCTGTAGTATTAGTTAATATTCATAGCTAATGCTACAGGAATAAGCGCTTTTTTGGCAAGCAAAAGACGGCATACGAGATCCGTCACATGACCATGACTGTTCGCCGTCTTCGT	CLL-H-027688	ACTL7A	Homo sapiens actin-like 7A (ACTL7A), mRNA.		10881	NM_006687.2	11761636	NP_006678.1	9	9q31.3a	18.8234	23.9325	21.3779	3.61267	16.8991	75.4574	64.5196	69.9885	7.73421	11.0507	3.52969	3.01805	3.27387	0.361785	0.0150712	0		2.65621
4052	ACGTACACGTTGCAACCA	TGTCCCAATATCACCAGAATT	TAGAAGACGCACCGGTGTCCCAATATCACTAGAATTGTTAATATTCATAGCAATTCTGGTGATATTGGGACATTTTTTGGCAAGCAAAAGACGGCATACGAGATCCTGGTTGCAACGTGTACGTTTCGCCGTCTTCGT	CLL-H-031526	CPXM2	Homo sapiens carboxypeptidase X (M14 family), member 2 (CPXM2), mRNA.	UNQ676	119587	NM_198148.2	39930572	NP_937791.1	10	10q26.13c	15.6479	13.3212	14.4846	1.64525	11.3586	62.2167	32.5259	47.3713	20.9946	44.3191	4.29538	2.24556	3.27047	1.44944	0.157861	0		2.65208
8494	CATGCAACCAGTCAACTG	GCCACAAAGCACCTGGATGAT	TAGAAGACGCACCGGGCCATAAAGCACTTGGATGATGTTAATATTCATAGCATCATCCAGGTGCTTTGTGGCTTTTTTGGCAAGCAAAAGACGGCATACGAGATCCCAGTTGACTGGTTGCATGTTCGCCGTCTTCGT	CLL-H-035968	HBG1	Homo sapiens hemoglobin, gamma A (HBG1), mRNA.	HBGR; HSGGL1; HBGA; PRO2979	3047	NM_000559.2	28302130	NP_000550.2	11	11p15.4c	8.89127	8.90849	8.89988	0.0121718	0.136763	46.6686	11.5105	29.0895	24.8605	85.4621	5.24373	1.29333	3.26853	2.79335	0.369587	0		2.64973
439	CAGTCATGTGTGGTACAC	GCGATGCTCTTGGCTACAGAA	TAGAAGACGCACCGGGCGATGTTCTTGGCTATAGAAGTTAATATTCATAGCTTCTGTAGCCAAGAGCATCGCTTTTTTGGCAAGCAAAAGACGGCATACGAGATCCGTGTACCACACATGACTGTTCGCCGTCTTCGT	CLL-H-027913	ADPRHL1	Homo sapiens ADP-ribosylhydrolase like 1 (ADPRHL1), transcript variant 2, mRNA.	ARH2	113622	NM_138430.3	40316945	NP_954631.1	13	13q34d	3.07843	10.8812	6.97983	5.51741	79.048	29.1754	16.4436	22.8095	9.00278	39.4695	4.17996	2.35587	3.26791	1.28983	0.168092	0		2.64899
11383	CATGTGACCATGTGACAC	CTGGACCACATGGTGGAATAT	TAGAAGACGCACCGGCTGGATCATATGGTGGAATATGTTAATATTCATAGCATATTCCACCATGTGGTCCAGTTTTTTGGCAAGCAAAAGACGGCATACGAGATCCGTGTCACATGGTCACATGTTCGCCGTCTTCGT	CLL-H-038857	M6PRBP1	Homo sapiens mannose-6-phosphate receptor binding protein 1 (M6PRBP1), mRNA.	MGC2012; TIP47; PP17; MGC11117	10226	NM_001164189.1	51317356	NP_005808.2	19	19p13.3d	12.5166	20.6411	16.5788	5.74491	34.652	80.0481	28.1441	54.0961	36.7017	67.8453	4.82833	1.69759	3.26296	2.21377	0.28941	0		2.64297
26488	CAGTACCATGTGACTGCA	GTCTGGATAAATAGCTGCGTT	TAGAAGACGCACCGGGTCTGGATAAATAGCTGTGTTGTTAATATTCATAGCAACGCAGCTATTTATCCAGACTTTTTTGGCAAGCAAAAGACGGCATACGAGATCCTGCAGTCACATGGTACTGTTCGCCGTCTTCGT	CLL-H-053962	ZDHHC23	Homo sapiens zinc finger, DHHC-type containing 23 (ZDHHC23), mRNA.	MGC42530; NIDD	254887	NM_173570.3	50234885	NP_775841.2	3	3q13.31a	21.743	23.9844	22.8637	1.58487	6.93181	34.9984	113.917	74.4576	55.8037	74.947	1.53074	4.98243	3.25658	2.44071	0.32128	0		2.63523
23925	TGGTGTGTTGACACACCA	CAGCACTCACACCACTAACAT	TAGAAGACGCACCGGCAGCACTCACACTACTAATATGTTAATATTCATAGCATGTTAGTGGTGTGAGTGCTGTTTTTTGGCAAGCAAAAGACGGCATACGAGATCCTGGTGTGTCAACACACCATTCGCCGTCTTCGT	CLL-H-051399	TIE1	Homo sapiens tyrosine kinase with immunoglobulin-like and EGF-like domains 1 (TIE1), mRNA.	JTK14; TIE	7075	NM_005424.2	31543809	NP_005415.1	1	1p34.2a	0.202876	15.2939	7.74841	10.671	137.719	22.3859	28.0396	25.2128	3.99773	15.856	2.8891	3.61875	3.25393	0.515943	0.162509	0		2.63201
2721	CATGTGGTTGCATGACGT	GCCACTGAAGAGGATTTAATA	TAGAAGACGCACCGGGCCATTGAAGAGGATTTAATAGTTAATATTCATAGCTATTAAATCCTCTTCAGTGGCTTTTTTGGCAAGCAAAAGACGGCATACGAGATCCACGTCATGCAACCACATGTTCGCCGTCTTCGT	CLL-H-030195	CATSPER2	Homo sapiens cation channel, sperm associated 2 (CATSPER2), transcript variant 4, mRNA.	MGC33346	117155	NM_054020.2	26051226	NP_742095.1	15	15q15.3a	9.14707	2.87605	6.01156	4.43428	73.7626	25.7565	13.3544	19.5555	8.76958	44.8446	4.2845	2.22146	3.25298	1.45879	0.190605	0		2.63086
14341	ACCACACATGTGGTTGTG	CCAACCAGCTCCATCACTTCT	TAGAAGACGCACCGGCCAACCAGCTTCATCATTTCTGTTAATATTCATAGCAGAAGTGATGGAGCTGGTTGGTTTTTTGGCAAGCAAAAGACGGCATACGAGATCCCACAACCACATGTGTGGTTTCGCCGTCTTCGT	CLL-H-041815	OR10K1	Homo sapiens olfactory receptor, family 10, subfamily K, member 1 (OR10K1), mRNA.	OR1-6	391109	NM_001004473.1	52218851	NP_001004473.1	1	1q23.1f	48.5933	38.9461	43.7697	6.8216	15.5852	44.6873	239.8	142.244	137.966	96.9924	1.02096	5.47868	3.24982	3.15208	0.419516	0		2.62703
19023	CACAACACACACCATGTG	CACGTAAAGGTCTCATTTCAA	TAGAAGACGCACCGGCACGTAAAGGTCTTATTTCAAGTTAATATTCATAGCTTGAAATGAGACCTTTACGTGTTTTTTGGCAAGCAAAAGACGGCATACGAGATCCCACATGGTGTGTGTTGTGTTCGCCGTCTTCGT	CLL-H-046497	RALGAPA2	Homo sapiens Ral GTPase activating protein, alpha subunit 2 (catalytic) (RALGAPA2), mRNA. XM_945392	KIAA1272; RP11-470C13.2; dJ1049G11.4; AS250; bA287B20.1; FLJ12819; dJ1049G11	57186	NM_020343.2	118600960	NP_065076.2	20	20p11.23b-p11.23a	0.0529242	17.8585	8.95571	12.5904	140.586	54.1467	4.05861	29.1026	35.4176	121.699	6.04605	0.453187	3.24962	3.95475	0.527596	0		2.62678
18580	TGCATGACTGACCAACTG	CGGCAAGAATGTGACCTGCAA	TAGAAGACGCACCGGCGGCAAGAATGTGATCTGTAAGTTAATATTCATAGCTTGCAGGTCACATTCTTGCCGTTTTTTGGCAAGCAAAAGACGGCATACGAGATCCCAGTTGGTCAGTCATGCATTCGCCGTCTTCGT	CLL-H-046054	PVR	Homo sapiens poliovirus receptor (PVR), mRNA.	Necl-5; HVED; NECL5; TAGE4; PVS; CD155	5817	NM_001135768.1	19923371	NP_006496.2	19	19q13.31b	63.1739	39.8701	51.522	16.4782	31.9829	44.1316	290.547	167.339	174.242	104.125	0.856558	5.63928	3.24792	3.3819	0.448148	0		2.62472
107	ACACACACTGACACTGAC	GCTGATGTCAACTGGGTCAAT	TAGAAGACGCACCGGGCTGATGTCAATTGGGTTAATGTTAATATTCATAGCATTGACCCAGTTGACATCAGCTTTTTTGGCAAGCAAAAGACGGCATACGAGATCCGTCAGTGTCAGTGTGTGTTTCGCCGTCTTCGT	CLL-H-027581	ACAP1	Homo sapiens ArfGAP with coiled-coil, ankyrin repeat and PH domains 1 (ACAP1), mRNA.	KIAA0050; ACAP1	9744	NM_014716.3	41281459	NP_055531.1	17	17p13.1d	37.2675	67.6858	52.4766	21.509	40.9878	80.3018	260.331	170.316	127.3	74.7431	1.53024	4.96089	3.24557	2.42584	0.325849	0		2.62186
2455	TGTGACGTACTGTGTGGT	GAGTTACTACCAGGGCTCTTT	TAGAAGACGCACCGGGAGTTACTATCAGGGTTCTTTGTTAATATTCATAGCAAAGAGCCCTGGTAGTAACTCTTTTTTGGCAAGCAAAAGACGGCATACGAGATCCACCACACAGTACGTCACATTCGCCGTCTTCGT	CLL-H-029929	C7ORF27	Homo sapiens chromosome 7 open reading frame 27 (C7orf27), mRNA.	MGC22916	221927	NM_152743.2	52851444	NP_689956.1	7	7p22.2c	36.3854	34.3049	35.3452	1.47112	4.16215	189.658	39.5691	114.614	106.129	92.5972	5.36589	1.1195	3.2427	3.00265	0.401624	0		2.61838
23454	ACGTCACATGCAGTACCA	GTGGAACAACAAGTACATAAA	TAGAAGACGCACCGGGTGGAACAACAAGTACATAAAGTTAATATTCATAGCTTTATGTACTTGTTGTTCCACTTTTTTGGCAAGCAAAAGACGGCATACGAGATCCTGGTACTGCATGTGACGTTTCGCCGTCTTCGT	CLL-H-050928	TAS2R42	Homo sapiens taste receptor, type 2, member 42 (TAS2R42), mRNA.	T2R55; T2R24; hT2R55	353164	NM_181429.1	31088851	NP_852094.1	12	12p13.2b	9.06769	42.3101	25.6889	23.5059	91.5023	146.94	19.2855	83.1128	90.2654	108.606	5.71999	0.750734	3.23536	3.51379	0.475747	0		2.60947
6512	TGGTGTGTTGTGACACAC	CAAGGAGTAATAGAAGAGAAT	TAGAAGACGCACCGGCAAGGAGTAATAGAAGAGAATGTTAATATTCATAGCATTCTCTTCTATTACTCCTTGTTTTTTGGCAAGCAAAAGACGGCATACGAGATCCGTGTGTCACAACACACCATTCGCCGTCTTCGT	CLL-H-033986	FBXO11	Homo sapiens F-box protein 11 (FBXO11), transcript variant 2, mRNA.	FLJ12673; PRMT9; UG063H01; MGC44383; FBX11; VIT1	80204	NM_012167.1	30089923	NP_061163.2	2	2p16.3d	11.317	4.18429	7.75063	5.04356	65.073	16.3817	33.676	25.0289	12.2289	48.8592	2.1136	4.34494	3.22927	1.5778	0.205983	0		2.60208
7285	GTACACACTGGTTGACTG	CAGTGCTATGACACATAACTA	TAGAAGACGCACCGGCAGTGCTATGACACATAATTAGTTAATATTCATAGCTAGTTATGTGTCATAGCACTGTTTTTTGGCAAGCAAAAGACGGCATACGAGATCCCAGTCAACCAGTGTGTACTTCGCCGTCTTCGT	CLL-H-034759	GALNTL5	Homo sapiens UDP-N-acetyl-alpha-D-galactosamine:polypeptide N-acetylgalactosaminyltransferase-like 5 (GALNTL5), mRNA.	GALNT15	168391	NM_145292.3	34222191	NP_660335.1	7	7q36.1e	24.7862	17.7962	21.2912	4.94266	23.2146	100.163	37.2879	68.7254	44.4593	64.6913	4.70443	1.75133	3.22788	2.08815	0.272484	0		2.60039
3617	ACGTCAGTGTCATGACTG	CGGAACAAACCCTCCTTTCAT	TAGAAGACGCACCGGCGGAATAAACCCTTCTTTCATGTTAATATTCATAGCATGAAAGGAGGGTTTGTTCCGTTTTTTGGCAAGCAAAAGACGGCATACGAGATCCCAGTCATGACACTGACGTTTCGCCGTCTTCGT	CLL-H-031091	CLIC6	Homo sapiens chloride intracellular channel 6 (CLIC6), mRNA.	CLIC1L	54102	NM_053277.1	27894377	NP_444507.1	21	21q22.12a	7.34765	18.4711	12.9094	7.86546	60.9283	37.9824	45.215	41.5987	5.11424	12.2942	2.94223	3.5025	3.22237	0.396165	0.0495315	0		2.5937
18747	CAGTACTGGTCATGTGCA	GAGGTGGGAAACAGGAATCCT	TAGAAGACGCACCGGGAGGTGGGAAATAGGAATTCTGTTAATATTCATAGCAGGATTCCTGTTTCCCACCTCTTTTTTGGCAAGCAAAAGACGGCATACGAGATCCTGCACATGACCAGTACTGTTCGCCGTCTTCGT	CLL-H-046221	RAB20	Homo sapiens RAB20, member RAS oncogene family (RAB20), mRNA.	FLJ20429	55647	NM_017817.1	8923400	NP_060287.1	13	13q34a	8.84717	13.9753	11.4112	3.62615	31.777	51.8392	21.6998	36.7695	21.3118	57.9605	4.54282	1.90161	3.22222	1.86761	0.239003	0		2.59352
4638	GTTGCACACAGTACTGGT	GACAGTTGTAAACGGCATCAT	TAGAAGACGCACCGGGACAGTTGTAAACGGTATCATGTTAATATTCATAGCATGATGCCGTTTACAACTGTCTTTTTTGGCAAGCAAAAGACGGCATACGAGATCCACCAGTACTGTGTGCAACTTCGCCGTCTTCGT	CLL-H-032112	DAGLB	Homo sapiens diacylglycerol lipase, beta (DAGLB), mRNA.	FLJ33624; DAGLBETA; FLJ33909; KCCR13L	221955	NM_001142936.1	21040276	NP_631918.1	7	7p22.1b	15.6303	8.04671	11.8385	5.3624	45.2963	34.334	41.9358	38.1349	5.37532	14.0956	2.90019	3.54232	3.22126	0.454054	0.0392468	0		2.59236
131	ACACTGCACATGACACAC	GCGACAGAGGGAAATGACATT	TAGAAGACGCACCGGGCGATAGAGGGAAATGATATTGTTAATATTCATAGCAATGTCATTTCCCTCTGTCGCTTTTTTGGCAAGCAAAAGACGGCATACGAGATCCGTGTGTCATGTGCAGTGTTTCGCCGTCTTCGT	CLL-H-027605	ACR	Homo sapiens acrosin (ACR), mRNA.		49	NM_001097.2	148613877	NP_001088.2	22	22q13.33b	42.4805	50.9694	46.725	6.00255	12.8466	163.95	136.966	150.458	19.0805	12.6816	3.50883	2.93133	3.22008	0.408357	0.0180879	0		2.59093
10323	TGCAGTACTGCAACTGTG	GAGTACTTCATGAACAATGTT	TAGAAGACGCACCGGGAGTACTTCATGAACAATGTTGTTAATATTCATAGCAACATTGTTCATGAAGTACTCTTTTTTGGCAAGCAAAAGACGGCATACGAGATCCCACAGTTGCAGTACTGCATTCGCCGTCTTCGT	CLL-H-037797	KLHL10	Homo sapiens kelch-like 10 (Drosophila) (KLHL10), mRNA.	FLJ32662	317719	NM_152467.3	148664208	NP_689680.2	17	17q21.2b	28.0675	20.9734	24.5204	5.01631	20.4577	133.397	24.0285	78.713	77.3355	98.25	5.44026	0.979938	3.2101	3.15392	0.426936	0		2.57881
18840	TGTGTGCAGTACGTACAC	CAGATCAATAACCCGATCTTA	TAGAAGACGCACCGGCAGATCAATAACCTGATCTTAGTTAATATTCATAGCTAAGATCGGGTTATTGATCTGTTTTTTGGCAAGCAAAAGACGGCATACGAGATCCGTGTACGTACTGCACACATTCGCCGTCTTCGT	CLL-H-046314	RAB39	Homo sapiens RAB39, member RAS oncogene family (RAB39), mRNA.		54734	NM_017516.1	39930370	NP_059986.1	11	11q22.3c	8.39731	11.961	10.1792	2.51994	24.7558	18.9187	46.3366	32.6277	19.3874	59.4201	1.85857	4.5521	3.20533	1.90461	0.245894	0		2.57303
22349	CAACTGACACACTGACAC	CCTGTACTCTGAGCTGTGAAT	TAGAAGACGCACCGGCCTGTATTCTGAGTTGTGAATGTTAATATTCATAGCATTCACAGCTCAGAGTACAGGTTTTTTGGCAAGCAAAAGACGGCATACGAGATCCGTGTCAGTGTGTCAGTTGTTCGCCGTCTTCGT	CLL-H-049823	SOLH	Homo sapiens small optic lobes homolog (Drosophila) (SOLH), mRNA.	MGC131491; CAPN15	6650	NM_005632.2	41406087	NP_005623.1	16	16p13.3f	22.8986	18.5438	20.7212	3.0793	14.8606	67.4719	65.356	66.4139	1.49617	2.2528	3.25618	3.15407	3.20513	0.0722051	0.00279512	0		2.57278
11723	CAGTCAGTTGGTTGTGCA	TTCCTGGAGCTGGTCAATTTA	TAGAAGACGCACCGGTTCCTGGAGCTGGTTAATTTAGTTAATATTCATAGCTAAATTGACCAGCTCCAGGAATTTTTTGGCAAGCAAAAGACGGCATACGAGATCCTGCACAACCAACTGACTGTTCGCCGTCTTCGT	CLL-H-039197	MCAM	Homo sapiens melanoma cell adhesion molecule (MCAM), mRNA.	MUC18; CD146	4162	NM_006500.2	71274106	NP_006491.2	11	11q23.3e	7.74458	8.51394	8.12926	0.544018	6.69209	41.4255	10.6836	26.0545	21.7378	83.432	5.09585	1.31421	3.20503	2.67402	0.363914	0		2.57266
7964	CAACTGTGGTCAACACGT	CTTCAGCAAATCCTCTCATTT	TAGAAGACGCACCGGCTTCAGCAAATCCTCTTATTTGTTAATATTCATAGCAAATGAGAGGATTTGCTGAAGTTTTTTGGCAAGCAAAAGACGGCATACGAGATCCACGTGTTGACCACAGTTGTTCGCCGTCTTCGT	CLL-H-035438	GPR151	Homo sapiens G protein-coupled receptor 151 (GPR151), mRNA.	GALR4; PGR7; GALRL; GPCR	134391	NM_194251.2	57977304	NP_919227.2	5	5q32d	2.09051	11.255	6.67276	6.48028	97.1155	31.5795	11.1208	21.3501	14.4665	67.7583	4.7326	1.66659	3.1996	2.16799	0.320593	0		2.56607
16997	TGGTGTACCATGTGACCA	GCTCATGCTTTCCCGTAAGAT	TAGAAGACGCACCGGGCTCATGCTTTCCTGTAAGGTGTTAATATTCATAGCATCTTACGGGAAAGCATGAGCTTTTTTGGCAAGCAAAAGACGGCATACGAGATCCTGGTCACATGGTACACCATTCGCCGTCTTCGT	CLL-H-044471	PITPNM2	Homo sapiens phosphatidylinositol transfer protein, membrane-associated 2 (PITPNM2), mRNA.	RDGB2; KIAA1457; NIR3; RDGBA2	57605	NM_020845.2	83025111	NP_065896.1	12	12q24.31d	29.2406	17.8793	23.56	8.0337	34.099	59.8247	90.7437	75.2842	21.863	29.0407	2.53925	3.85161	3.19543	0.927975	0.0881869	0		2.56101
21232	CACAGTGTGTCAACACGT	GAGCACCTTCACAAGAATGAA	TAGAAGACGCACCGGGAGCACCTTCATAAGAATGAAGTTAATATTCATAGCTTCATTCTTGTGAAGGTGCTCTTTTTTGGCAAGCAAAAGACGGCATACGAGATCCACGTGTTGACACACTGTGTTCGCCGTCTTCGT	CLL-H-048706	SIX2	Homo sapiens SIX homeobox 2 (SIX2), mRNA.		10736	NM_016932.4	34147624	NP_058628.2	2	2p21c	4.79846	16.6645	10.7315	8.39054	78.1863	61.9751	6.59643	34.2858	39.1586	114.213	5.77508	0.614681	3.19488	3.64895	0.493028	0		2.56034
27398	ACCATGCATGGTACTGGT	GAGAAACCTTACAGGTGTAAT	TAGAAGACGCACCGGGAGAAACCTTATAGGTGTAATGTTAATATTCATAGCATTACACCTGTAAGGTTTCTCTTTTTTGGCAAGCAAAAGACGGCATACGAGATCCACCAGTACCATGCATGGTTTCGCCGTCTTCGT	CLL-H-054872	ZNF813	Homo sapiens zinc finger protein 813 (ZNF813), mRNA.	FLJ16542; FLJ34141	126017	NM_001004301.3	146149286	NP_001004301.2	19	19q13.41b	39.2874	25.4691	32.3783	9.77101	30.1777	137.807	68.9013	103.354	48.7236	47.1424	4.25616	2.12801	3.19208	1.50483	0.180826	0		2.55695
21906	GTACACCAACCATGACCA	CCGGCTTTGTTGGTCACTATA	TAGAAGACGCACCGGCCGGCTTTGTTGGTCATTATGGTTAATATTCATAGCTATAGTGACCAACAAAGCCGGTTTTTTGGCAAGCAAAAGACGGCATACGAGATCCTGGTCATGGTTGGTGTACTTCGCCGTCTTCGT	CLL-H-049380	SLC4A4	Homo sapiens solute carrier family 4, sodium bicarbonate cotransporter, member 4 (SLC4A4), transcript variant 2, mRNA.	KNBC; pNBC; NBC2; NBC1; hhNMC; HNBC1; SLC4A5; DKFZp781H1314	8671	NM_001098484.2	148596978	NP_003750.1	4	4q13.3b	14.9864	9.86371	12.425	3.62228	29.153	39.9637	39.2459	39.6048	0.507526	1.28148	3.21638	3.15861	3.1875	0.040847	0.00893378	0		2.55138
19141	TGACTGCAACTGCAACAC	GCTGCAGTGAACAGCTGAATA	TAGAAGACGCACCGGGCTGTAGTGAACAGTTGAATAGTTAATATTCATAGCTATTCAGCTGTTCACTGCAGCTTTTTTGGCAAGCAAAAGACGGCATACGAGATCCGTGTTGCAGTTGCAGTCATTCGCCGTCTTCGT	CLL-H-046615	RASL11B	Homo sapiens RAS-like, family 11, member B (RASL11B), mRNA.	MGC2827; MGC4499	65997	NM_023940.2	34147350	NP_076429.1	4	4q12a	34.1626	10.2686	22.2156	16.8956	76.0527	15.4756	125.779	70.6273	77.9962	110.434	0.696611	5.66173	3.17917	3.51087	0.481347	0		2.54128
23493	ACACCATGCAACTGTGAC	GATCTCCTTTAGAACCAGTTT	TAGAAGACGCACCGGGATCTCCTTTAGAACTAGTTTGTTAATATTCATAGCAAACTGGTTCTAAAGGAGATCTTTTTTGGCAAGCAAAAGACGGCATACGAGATCCGTCACAGTTGCATGGTGTTTCGCCGTCTTCGT	CLL-H-050967	TBC1D1	Homo sapiens TBC1 (tre-2/USP6, BUB2, cdc16) domain family, member 1 (TBC1D1), mRNA.	TBC; KIAA1108; TBC1	23216	NM_015173.2	50658060	NP_055988.2	4	4p14d	46.4498	30.7851	38.6175	11.0766	28.6829	229.549	15.9113	122.73	151.065	123.087	5.94418	0.412022	3.1781	3.91183	0.514522	0		2.53998
25102	GTCACACATGACTGACTG	CCTGGTTCACAAATCTCCAGA	TAGAAGACGCACCGGCCTGGTTCATAAATCTCTAGAGTTAATATTCATAGCTCTGGAGATTTGTGAACCAGGTTTTTTGGCAAGCAAAAGACGGCATACGAGATCCCAGTCAGTCATGTGTGACTTCGCCGTCTTCGT	CLL-H-052576	TSC22D4	Homo sapiens TSC22 domain family, member 4 (TSC22D4), mRNA.	THG-1	81628	NM_030935.3	37059797	NP_112197.1	7	7q22.1c	31.2341	36.2465	33.7403	3.54431	10.5047	62.5912	151.271	106.931	62.7062	58.6416	1.85509	4.48339	3.16924	1.85849	0.241109	0		2.52923
20034	ACGTACCAACGTACACGT	CGTACTTTGTCTGACTACAAT	TAGAAGACGCACCGGCGTACTTTGTCTGACTATAATGTTAATATTCATAGCATTGTAGTCAGACAAAGTACGTTTTTTGGCAAGCAAAAGACGGCATACGAGATCCACGTGTACGTTGGTACGTTTCGCCGTCTTCGT	CLL-H-047508	RPS27A	Homo sapiens ribosomal protein S27a (RPS27A), mRNA.	UBCEP1; UBA80; CEP80; HUBCEP80; UBCEP80	6233	NM_001135592.1	27436941	NP_002945.1	2	2p16.1d	3.04314	12.6775	7.8603	6.81249	86.6696	27.0492	22.7358	24.8925	3.04999	12.2527	3.44124	2.89249	3.16686	0.388025	0.0840896	0		2.52634
4698	CAACGTGTGTACACACAC	AGCTACAATAACAGAACGATA	TAGAAGACGCACCGGAGCTACAATAACAGAACGATAGTTAATATTCATAGCTATCGTTCTGTTATTGTAGCTTTTTTTGGCAAGCAAAAGACGGCATACGAGATCCGTGTGTGTACACACGTTGTTCGCCGTCTTCGT	CLL-H-032172	DCLK1	Homo sapiens doublecortin-like kinase 1 (DCLK1), mRNA.	DCDC3A; DCLK; DCAMKL1; KIAA0369	9201	NM_004734.3	42544237	NP_004725.1	13	13q13.3a	3.45772	14.2349	8.8463	7.62061	86.1446	20.6584	35.3204	27.9894	10.3676	37.0412	2.33525	3.99267	3.16396	1.17197	0.170057	0		2.52282
8441	TGACACTGTGTGGTACAC	ACTTCCTGTGGGAGGACGATT	TAGAAGACGCACCGGACTTCTTGTGGGAGGATGATTGTTAATATTCATAGCAATCGTCCTCCCACAGGAAGTTTTTTTGGCAAGCAAAAGACGGCATACGAGATCCGTGTACCACACAGTGTCATTCGCCGTCTTCGT	CLL-H-035915	HAGHL	Homo sapiens hydroxyacylglutathione hydrolase-like (HAGHL), transcript variant 2, mRNA.	MGC2605	84264	NM_032304.2	46361985	NP_115680.1	16	16p13.3f	30.2109	10.0921	20.1515	14.2261	70.5958	31.1808	96.152	63.6664	45.9416	72.1598	1.54732	4.77145	3.15938	2.27981	0.329074	0		2.51726
8000	GTTGCATGTGCAGTCAAC	CCTGACTGATAGCATTTCAGA	TAGAAGACGCACCGGCCTGACTGATAGTATTTCAGAGTTAATATTCATAGCTCTGAAATGCTATCAGTCAGGTTTTTTGGCAAGCAAAAGACGGCATACGAGATCCGTTGACTGCACATGCAACTTCGCCGTCTTCGT	CLL-H-035474	GPR160	Homo sapiens G protein-coupled receptor 160 (GPR160), mRNA.	GPCR1; GPCR150	26996	NM_014373.2	7657135	NP_055188.1	3	3q26.2b	14.3689	14.1518	14.2604	0.153517	1.07653	57.3119	32.697	45.0044	17.4053	38.6747	4.01896	2.29286	3.15591	1.22054	0.129788	0		2.51304
4561	ACCATGCAGTACCAACAC	CAGCTGCTAGCTGTGGAGCTA	TAGAAGACGCACCGGCAGCTGCTAGTTGTGGAGTTAGTTAATATTCATAGCTAGCTCCACAGCTAGCAGCTGTTTTTTGGCAAGCAAAAGACGGCATACGAGATCCGTGTTGGTACTGCATGGTTTCGCCGTCTTCGT	CLL-H-032035	CYP26C1	Homo sapiens cytochrome P450, family 26, subfamily C, polypeptide 1 (CYP26C1), mRNA.	FLJ45301	340665	NM_183374.2	62952501	NP_899230.2	10	10q23.33a	38.9875	29.4769	34.2322	6.72502	19.6453	166.064	49.92	107.992	82.1264	76.0485	4.85111	1.45827	3.15469	2.3991	0.333042	0		2.51157
13987	GTACACTGTGCAGTACAC	GCTCTCAGTTTACTGGAAGAA	TAGAAGACGCACCGGGCTCTCAGTTTATTGGAAGAAGTTAATATTCATAGCTTCTTCCAGTAAACTGAGAGCTTTTTTGGCAAGCAAAAGACGGCATACGAGATCCGTGTACTGCACAGTGTACTTCGCCGTCTTCGT	CLL-H-041461	NUP205	Homo sapiens nucleoporin 205kDa (NUP205), mRNA.	C7orf14	23165	NM_015135.2	57634533	NP_055950.1	7	7q33c	17.2533	33.1317	25.1925	11.2277	44.5677	84.663	74.1481	79.4055	7.43521	9.36359	3.36065	2.94326	3.15195	0.295136	0.0294927	0		2.50824
22864	GTCATGTGTGTGTGACTG	CCCACCTTTCATGCGTAGTAA	TAGAAGACGCACCGGCCCATCTTTCATGTGTAGTAAGTTAATATTCATAGCTTACTACGCATGAAAGGTGGGTTTTTTGGCAAGCAAAAGACGGCATACGAGATCCCAGTCACACACACATGACTTCGCCGTCTTCGT	CLL-H-050338	SSX4	PREDICTED: Homo sapiens synovial sarcoma, X breakpoint 4, transcript variant 4 (SSX4), mRNA.		6759	NM_005636.3	89065691	XP_947886.1		Xp11.23d	70.2746	60.5943	65.4344	6.84497	10.4608	224.777	187.019	205.898	26.6991	12.9671	3.43516	2.85812	3.14664	0.408028	0.0187134	0		2.50179
25576	GTACCAACCATGTGTGTG	ACTGGAGCACTTGGCTCTTAT	TAGAAGACGCACCGGACTGGAGTACTTGGTTCTTATGTTAATATTCATAGCATAAGAGCCAAGTGCTCCAGTTTTTTTGGCAAGCAAAAGACGGCATACGAGATCCCACACACATGGTTGGTACTTCGCCGTCTTCGT	CLL-H-053050	UBIAD1	Homo sapiens UbiA prenyltransferase domain containing 1 (UBIAD1), mRNA.	RP4-796F18.1; TERE1	29914	NM_013319.2	7019550	NP_037451.1	1	1p36.22b	37.338	58.2478	47.7929	14.7854	30.9364	263.63	37.0693	150.349	160.202	106.553	5.51608	0.775623	3.14585	3.35201	0.462467	0		2.50084
26193	CAACACTGCATGTGACCA	GCAGCTTTCAACAAGCTACAA	TAGAAGACGCACCGGGCAGCTTTCAACAAGTTACAAGTTAATATTCATAGCTTGTAGCTTGTTGAAAGCTGCTTTTTTGGCAAGCAAAAGACGGCATACGAGATCCTGGTCACATGCAGTGTTGTTCGCCGTCTTCGT	CLL-H-053667	WISP3	Homo sapiens WNT1 inducible signaling pathway protein 3 (WISP3), transcript variant 2, mRNA.	LIBC; PPAC; PPD; CCN6; MGC125987; MGC125989; MGC125988	8838	NM_003880.3	18491003	NP_569080.1	6	6q21i	30.7049	25.4068	28.0559	3.74628	13.3529	26.7955	149.617	88.2064	86.8482	98.4602	0.955076	5.33284	3.14396	3.09554	0.430988	0		2.49854
16519	GTGTTGGTCAGTACTGAC	GCTCTTATGGACTTGGTACAA	TAGAAGACGCACCGGGCTCTTATGGACTTGGTATAAGTTAATATTCATAGCTTGTACCAAGTCCATAAGAGCTTTTTTGGCAAGCAAAAGACGGCATACGAGATCCGTCAGTACTGACCAACACTTCGCCGTCTTCGT	CLL-H-043993	PDSS2	Homo sapiens prenyl (decaprenyl) diphosphate synthase, subunit 2 (PDSS2), mRNA.	DLP1; hDLP1; C6orf210; bA59I9.3	57107	NM_020381.3	29893561	NP_065114.2	6	6q21d	15.6303	13.2589	14.4446	1.67683	11.6087	73.005	17.8123	45.4086	39.0271	85.9465	5.05414	1.23314	3.14364	2.70185	0.378816	0		2.49815
12850	GTTGTGACACGTACTGAC	CTTCGACTTACTGGAGGACAT	TAGAAGACGCACCGGCTTCGACTTATTGGAGGATATGTTAATATTCATAGCATGTCCTCCAGTAAGTCGAAGTTTTTTGGCAAGCAAAAGACGGCATACGAGATCCGTCAGTACGTGTCACAACTTCGCCGTCTTCGT	CLL-H-040324	MYH7B	Homo sapiens myosin, heavy chain 7B, cardiac muscle, beta (MYH7B), mRNA.	MGC96928; MGC96940; MYH14; MHC14	57644	NM_020884.3	114842388	NP_065935.2	20	20q11.22b	0.0705656	5.87669	2.97363	4.10555	138.065	12.8058	5.86455	9.33516	4.90818	52.5774	4.30644	1.97219	3.13931	1.65057	0.294967	0		2.49291
25077	CATGGTGTGTCATGACCA	GCTGGAAATCACTGTCTACAA	TAGAAGACGCACCGGGCTGGAAATCACTGTTTACAAGTTAATATTCATAGCTTGTAGACAGTGATTTCCAGCTTTTTTGGCAAGCAAAAGACGGCATACGAGATCCTGGTCATGACACACCATGTTCGCCGTCTTCGT	CLL-H-052551	TRPV3	Homo sapiens transient receptor potential cation channel, subfamily V, member 3 (TRPV3), mRNA.	VRL3	162514	NM_145068.2	22027467	NP_659505.1	17	17p13.3a	3.7488	19.3744	11.5616	11.049	95.5661	54.497	18.0404	36.2687	25.7787	71.0771	4.71362	1.56037	3.137	2.22968	0.338981	0		2.49009
8240	GTGTTGCACACAACTGGT	CGAACACCATTCAAAGATTAC	TAGAAGACGCACCGGCGAACACCATTCAAAGATTATGTTAATATTCATAGCGTAATCTTTGAATGGTGTTCGTTTTTTGGCAAGCAAAAGACGGCATACGAGATCCACCAGTTGTGTGCAACACTTCGCCGTCTTCGT	CLL-H-035714	GRK7	Homo sapiens G protein-coupled receptor kinase 7 (GRK7), mRNA.	GPRK7	131890	NM_139209.2	51896040	NP_631948.1	3	3q23c	27.6265	28.7916	28.209	0.823915	2.92075	158.852	17.8978	88.3749	99.6696	112.78	5.63124	0.63447	3.13286	3.53325	0.48322	0		2.48507
22386	CAGTTGGTCACAACACTG	GCCGAGTGGAAACTGCTCACA	TAGAAGACGCACCGGGCCGAGTGGAAATTGCTCATAGTTAATATTCATAGCTGTGAGCAGTTTCCACTCGGCTTTTTTGGCAAGCAAAAGACGGCATACGAGATCCCAGTGTTGTGACCAACTGTTCGCCGTCTTCGT	CLL-H-049860	SOX21	Homo sapiens SRY (sex determining region Y)-box 21 (SOX21), mRNA.	SOX25	11166	NM_007084.2	46094055	NP_009015.1	13	13q32.1a	12.5166	3.32251	7.91955	6.50119	82.0904	29.6224	19.9034	24.7629	6.8724	27.7529	3.74042	2.51319	3.1268	0.867777	0.128111	0		2.47772
6885	GTCACATGTGCATGTGAC	ACCGAGTTTGTGGCCCTAGTA	TAGAAGACGCACCGGACCGGGTTTGTGGCCTTAGTAGTTAATATTCATAGCTACTAGGGCCACAAACTCGGTTTTTTTGGCAAGCAAAAGACGGCATACGAGATCCGTCACATGCACATGTGACTTCGCCGTCTTCGT	CLL-H-034359	FKRP	Homo sapiens fukutin related protein (FKRP), transcript variant 1, mRNA.	LGMD2I; MGC2991; FLJ12576; MDC1C	79147	NM_001039885.2	89941473	NP_077277.1	19	19q13.32b	7.13595	2.9072	5.02157	2.99018	59.5467	23.0141	8.38336	15.6987	10.3455	65.9003	4.58305	1.66947	3.12626	2.06021	0.295927	0		2.47706
14386	GTACGTCAGTCAGTACCA	CCAGACAATCCTGAAGGAATT	TAGAAGACGCACCGGCCAGACAATCTTGAAGGAATTGTTAATATTCATAGCAATTCCTTCAGGATTGTCTGGTTTTTTGGCAAGCAAAAGACGGCATACGAGATCCTGGTACTGACTGACGTACTTCGCCGTCTTCGT	CLL-H-041860	OR10X1	Homo sapiens olfactory receptor, family 10, subfamily X, member 1 (OR10X1), mRNA.	OR1-14; OR1-13; OR10X1P	128367	NM_001004477.1	52317183	NP_001004477.1	1	1q23.1f	30.0433	29.7261	29.8847	0.224312	0.750592	132.262	54.4538	93.3578	55.0186	58.933	4.42574	1.82213	3.12393	1.84103	0.244364	0		2.47424
18775	TGCAACGTCAACGTACTG	CTTGAATGTTACCCTTCAAAT	TAGAAGACGCACCGGCTTGAATGTTACCCTTCAAATGTTAATATTCATAGCATTTGAAGGGTAACATTCAAGTTTTTTGGCAAGCAAAAGACGGCATACGAGATCCCAGTACGTTGACGTTGCATTCGCCGTCTTCGT	CLL-H-046249	RAB28	Homo sapiens RAB28, member RAS oncogene family (RAB28), transcript variant 1, mRNA.	MGC41862	9364	NM_001017979.2	63029938	NP_001017979.1	4	4p15.33c	20.5522	15.865	18.2086	3.31439	18.2023	77.6803	35.9287	56.8045	29.5228	51.9727	4.26613	1.97317	3.11965	1.62137	0.207566	0		2.46904
8149	GTACCAACCAGTACACAC	GCTGTTCAGATATCCTCAGAT	TAGAAGACGCACCGGGCTGTTCAGATATCCTTAGATGTTAATATTCATAGCATCTGAGGATATCTGAACAGCTTTTTTGGCAAGCAAAAGACGGCATACGAGATCCGTGTGTACTGGTTGGTACTTCGCCGTCTTCGT	CLL-H-035623	GPR85	Homo sapiens G protein-coupled receptor 85 (GPR85), mRNA.	SREB; SREB2	54329	NM_001146265.1	153266935	NP_061843.3	7	7q31.1c	8.45024	21.5756	15.0129	9.28101	61.8202	69.0666	24.5703	46.8184	31.4636	67.2035	4.60048	1.63661	3.11855	2.09577	0.303903	0		2.4677
8128	ACGTACACCAGTACACGT	CGGGACATCCAACACAACATT	TAGAAGACGCACCGGCGGGACATCTAACACAATATTGTTAATATTCATAGCAATGTTGTGTTGGATGTCCCGTTTTTTGGCAAGCAAAAGACGGCATACGAGATCCACGTGTACTGGTGTACGTTTCGCCGTCTTCGT	CLL-H-035602	GPR63	Homo sapiens G protein-coupled receptor 63 (GPR63), mRNA.	PSP24B; PSP24(beta)	81491	NM_001143957.1	13540556	NP_110411.1	6	6q16.1f	8.91773	18.3569	13.6373	6.67448	48.9428	47.7679	37.2689	42.5184	7.42395	17.4606	3.50274	2.73286	3.1178	0.544385	0.0548711	0		2.46679
6316	GTTGTGCACAACTGTGTG	CTTTCGTGGATCAAATGGTAT	TAGAAGACGCACCGGCTTTCGTGGATTAAATGGTATGTTAATATTCATAGCATACCATTTGATCCACGAAAGTTTTTTGGCAAGCAAAAGACGGCATACGAGATCCCACACAGTTGTGCACAACTTCGCCGTCTTCGT	CLL-H-033790	FAM46D	Homo sapiens family with sequence similarity 46, member D (FAM46D), mRNA.	MGC26999	169966	NM_001170574.1	34303945	NP_689843.1	X	Xq21.1c	7.00364	14.7644	10.884	5.48769	50.4197	33.7541	34.1037	33.9289	0.247251	0.728732	3.10125	3.13337	3.11731	0.0227169	0.0272546	0		2.4662
10750	TGTGCAACCACACAACTG	GCCTTCCTCGATGAGATGAAA	TAGAAGACGCACCGGGCCTTTCTTGATGAGATGAAAGTTAATATTCATAGCTTTCATCTCATCGAGGAAGGCTTTTTTGGCAAGCAAAAGACGGCATACGAGATCCCAGTTGTGTGGTTGCACATTCGCCGTCTTCGT	CLL-H-038224	LDOC1	Homo sapiens leucine zipper, down-regulated in cancer 1 (LDOC1), mRNA.	Mart7; Mar7; BCUR1	23641	NM_012317.2	22035627	NP_036449.1	X	Xq27.1d	27.0002	17.7131	22.3567	6.56693	29.3735	17.6985	121.682	69.6904	73.5276	105.506	0.791645	5.44278	3.11721	3.28885	0.460228	0		2.46608
8091	GTACTGCAGTGTACACTG	CCTCCCAAAGTGCTCAGATTA	TAGAAGACGCACCGGCCTCCTAAAGTGCTTAGATTAGTTAATATTCATAGCTAATCTGAGCACTTTGGGAGGTTTTTTGGCAAGCAAAAGACGGCATACGAGATCCCAGTGTACACTGCAGTACTTCGCCGTCTTCGT	CLL-H-035565	GPR4	Homo sapiens G protein-coupled receptor 4 (GPR4), mRNA.		2828	NM_005282.2	4885334	NP_005273.1	19	19q13.32a	13.5839	11.3796	12.4817	1.55866	12.4875	44.2524	33.5524	38.9024	7.566	19.4487	3.54537	2.68812	3.11674	0.606165	0.0401843	0		2.46551
16514	CACAGTTGTGGTTGACAC	CTGTTCTTGCTGGAGATTTAA	TAGAAGACGCACCGGCTGTTCTTGTTGGAGATTTAAGTTAATATTCATAGCTTAAATCTCCAGCAAGAACAGTTTTTTGGCAAGCAAAAGACGGCATACGAGATCCGTGTCAACCACAACTGTGTTCGCCGTCTTCGT	CLL-H-043988	PDSS1	Homo sapiens prenyl (decaprenyl) diphosphate synthase, subunit 1 (PDSS1), mRNA.	TPT; hDPS1; RP13-16H11.3; COQ1; TPRT; MGC70953	23590	NM_014317.3	50659085	NP_055132.2	10	10p12.1b	8.69722	10.4036	9.55042	1.20661	12.6341	13.3736	46.1275	29.7505	23.1605	77.8491	1.40031	4.82989	3.1151	2.42508	0.343206	0		2.46352
2810	TGCATGCACAGTGTACCA	CGGAAGCAGGAACCAAGCTTA	TAGAAGACGCACCGGCGGAAGTAGGAACCAAGTTTAGTTAATATTCATAGCTAAGCTTGGTTCCTGCTTCCGTTTTTTGGCAAGCAAAAGACGGCATACGAGATCCTGGTACACTGTGCATGCATTCGCCGTCTTCGT	CLL-H-030284	CCL21	Homo sapiens chemokine (C-C motif) ligand 21 (CCL21), mRNA.	MGC34555; 6Ckine; TCA4; SLC; ECL; CKb9; SCYA21	6366	NM_002989.2	22165425	NP_002980.1	9	9p13.3c	15.4892	25.085	20.2871	6.78526	33.4462	49.1331	77.2562	63.1946	19.886	31.4679	2.42189	3.80815	3.11502	0.980233	0.101903	0		2.46342
8227	TGTGACCATGACCAACGT	CGAGTCCACCATGAACGAATA	TAGAAGACGCACCGGCGAGTCCACTATGAATGAATAGTTAATATTCATAGCTATTCGTTCATGGTGGACTCGTTTTTTGGCAAGCAAAAGACGGCATACGAGATCCACGTTGGTCATGGTCACATTCGCCGTCTTCGT	CLL-H-035701	GRIK5	Homo sapiens glutamate receptor, ionotropic, kainate 5 (GRIK5), mRNA.	KA2; GRIK2; EAA2	2901	NM_002088.3	29029596	NP_002079.3	19	19q13.2c	24.7862	14.4945	19.6403	7.27735	37.0531	71.4948	50.7944	61.1446	14.6374	23.939	3.64021	2.58623	3.11322	0.745274	0.0695648	0		2.46123
25029	GTGTCAACGTCATGACCA	CCTGGCAACTATTTCCCTGAA	TAGAAGACGCACCGGCCTGGCAATTATTTCCTTGAAGTTAATATTCATAGCTTCAGGGAAATAGTTGCCAGGTTTTTTGGCAAGCAAAAGACGGCATACGAGATCCTGGTCATGACGTTGACACTTCGCCGTCTTCGT	CLL-H-052503	TRPC5	Homo sapiens transient receptor potential cation channel, subfamily C, member 5 (TRPC5), mRNA.	TRP5	7224	NM_012471.2	93004076	NP_036603.1	X	Xq23a	16.9622	4.82803	10.8951	8.58017	78.7524	23.1591	44.5212	33.8401	15.1052	44.6371	2.12564	4.08634	3.10599	1.38642	0.202732	0		2.45246
5868	CAGTGTCACACAGTACCA	GCCACAGCAATGAATAATCTT	TAGAAGACGCACCGGGCCACAGTAATGAATAATCTTGTTAATATTCATAGCAAGATTATTCATTGCTGTGGCTTTTTTGGCAAGCAAAAGACGGCATACGAGATCCTGGTACTGTGTGACACTGTTCGCCGTCTTCGT	CLL-H-033342	ENOX2	Homo sapiens ecto-NOX disulfide-thiol exchanger 2 (ENOX2), transcript variant 1, mRNA.	COVA1; tNOX; APK1	10495	NM_006375.2	32528292	NP_006366.2	X	Xq25h-q26.1a	19.6261	9.96754	14.7968	6.82962	46.156	31.0963	60.7556	45.9259	20.9723	45.6655	2.10155	4.10599	3.10377	1.41735	0.184056	0		2.44977
26822	GTTGCATGACTGTGACAC	GCTGGCAAATATGGGAACAAT	TAGAAGACGCACCGGGCTGGCAAATATGGGAATAATGTTAATATTCATAGCATTGTTCCCATATTTGCCAGCTTTTTTGGCAAGCAAAAGACGGCATACGAGATCCGTGTCACAGTCATGCAACTTCGCCGTCTTCGT	CLL-H-054296	ZNF233	Homo sapiens zinc finger protein 233 (ZNF233), mRNA.	FLJ38032	353355	NM_181756.1	32308168	NP_861421.1	19	19q13.31b	27.5382	32.5399	30.039	3.53667	11.7736	167.454	18.8673	93.1604	105.066	112.78	5.57453	0.628093	3.10131	3.49766	0.485229	0		2.44678
24385	ACGTGTACGTGTTGACAC	CCATCTCATATTCAGGGCAAT	TAGAAGACGCACCGGCCATCTCATATTCAGGGTAATGTTAATATTCATAGCATTGCCCTGAATATGAGATGGTTTTTTGGCAAGCAAAAGACGGCATACGAGATCCGTGTCAACACGTACACGTTTCGCCGTCTTCGT	CLL-H-051859	TNIK	Homo sapiens TRAF2 and NCK interacting kinase (TNIK), mRNA.	AD 2	23043	NM_001161560.1	55741806	NP_055843.1	3	3q26.2c-q26.31a	16.0096	16.1142	16.0619	0.0739645	0.460497	63.1107	36.3089	49.7098	18.9517	38.1248	3.92922	2.26056	3.09489	1.17992	0.128701	0		2.43899
22669	ACTGACACACGTTGACGT	CAGTGGATTCAGAGTTGATTT	TAGAAGACGCACCGGCAGTGGATTTAGAGTTGATTTGTTAATATTCATAGCAAATCAACTCTGAATCCACTGTTTTTTGGCAAGCAAAAGACGGCATACGAGATCCACGTCAACGTGTGTCAGTTTCGCCGTCTTCGT	CLL-H-050143	SPRYD5	Homo sapiens SPRY domain containing 5 (SPRYD5), mRNA.	MGC10977; TRIM51	84767	NM_032681.3	14249255	NP_116070.1	11	11q11c	51.1072	86.0842	68.5957	24.7325	36.0555	228.317	195.887	212.102	22.9313	10.8114	3.32845	2.85568	3.09206	0.334297	0.0265242	0		2.43556
21808	GTCACAACCACATGACCA	GCTACACAAGTAGTTTATCAT	TAGAAGACGCACCGGGCTACACAAGTAGTTTATCATGTTAATATTCATAGCATGATAAACTACTTGTGTAGCTTTTTTGGCAAGCAAAAGACGGCATACGAGATCCTGGTCATGTGGTTGTGACTTCGCCGTCTTCGT	CLL-H-049282	SLC38A6	Homo sapiens solute carrier family 38, member 6 (SLC38A6), mRNA.	NAT-1; MGC102697	145389	NM_001172702.1	24429573	NP_722518.1	14	14q23.1c	4.2163	13.9546	9.08542	6.88598	75.7916	20.1389	35.9857	28.0623	11.2054	39.9305	2.21661	3.96082	3.08872	1.23334	0.178097	0		2.43149
24033	CAGTACCAGTCATGACCA	CGGACCAGAGATGTTATCAAT	TAGAAGACGCACCGGCGGACCAGAGATGTTATTAATGTTAATATTCATAGCATTGATAACATCTCTGGTCCGTTTTTTGGCAAGCAAAAGACGGCATACGAGATCCTGGTCATGACTGGTACTGTTCGCCGTCTTCGT	CLL-H-051507	TMC1	Homo sapiens transmembrane channel-like 1 (TMC1), mRNA.	DFNA36; DFNB11; DFNB7	117531	NM_138691.2	21071069	NP_619636.2	9	9q21.13a	17.6414	10.9954	14.3184	4.69941	32.8207	40.2898	48.1235	44.2067	5.53925	12.5303	2.81385	3.36095	3.0874	0.386862	0.0282878	0		2.4299
23194	CAACACCACAGTTGTGGT	GCCCACCTTCAGACTTCTATT	TAGAAGACGCACCGGGCCCACTTTCAGATTTCTATTGTTAATATTCATAGCAATAGAAGTCTGAAGGTGGGCTTTTTTGGCAAGCAAAAGACGGCATACGAGATCCACCACAACTGTGGTGTTGTTCGCCGTCTTCGT	CLL-H-050668	SUV39H2	Homo sapiens suppressor of variegation 3-9 homolog 2 (Drosophila) (SUV39H2), mRNA.	FLJ23414	79723	NM_024670.3	34147611	NP_078946.1	10	10p13c	8.44142	15.6989	12.0701	5.13179	42.5164	8.95196	65.4415	37.1967	39.9442	107.386	0.741661	5.42177	3.08172	3.30934	0.470663	0		2.423
1341	GTTGCAGTCAACTGTGGT	CCATAACATCGTGGAGGGTTT	TAGAAGACGCACCGGCCATAATATTGTGGAGGGTTTGTTAATATTCATAGCAAACCCTCCACGATGTTATGGTTTTTTGGCAAGCAAAAGACGGCATACGAGATCCACCACAGTTGACTGCAACTTCGCCGTCTTCGT	CLL-H-028815	ATP13A5	Homo sapiens ATPase type 13A5 (ATP13A5), mRNA.	FLJ16025	344905	NM_198505.2	66730420	NP_940907.2	3	3q29b	10.0203	18.0142	14.0173	5.65256	40.3256	74.648	11.6531	43.1505	44.5441	103.23	5.32542	0.831335	3.07838	3.1778	0.455703	0		2.41895
21987	ACCACAGTACTGCAACCA	CGGTGTGGACAGGTTCAATAA	TAGAAGACGCACCGGCGGTGTGGATAGGTTTAATAAGTTAATATTCATAGCTTATTGAACCTGTCCACACCGTTTTTTGGCAAGCAAAAGACGGCATACGAGATCCTGGTTGCAGTACTGTGGTTTCGCCGTCTTCGT	CLL-H-049461	SLC6A19	Homo sapiens solute carrier family 6 (neutral amino acid transporter), member 19 (SLC6A19), mRNA.	HND	340024	NM_001003841.2	51468072	NP_001003841.1	5	5p15.33d	5.80402	31.6365	18.7203	18.2663	97.5752	23.8477	91.314	57.5809	47.7059	82.8502	1.2739	4.87781	3.07585	2.54835	0.394549	0		2.41588
11703	ACGTTGCATGTGTGTGCA	TTCCAGGGTCAGGTCATAAAC	TAGAAGACGCACCGGTTCCAGGGTCAGGTTATAAATGTTAATATTCATAGCGTTTATGACCTGACCCTGGAATTTTTTGGCAAGCAAAAGACGGCATACGAGATCCTGCACACACATGCAACGTTTCGCCGTCTTCGT	CLL-H-039177	MBIP	Homo sapiens MAP3K12 binding inhibitory protein 1 (MBIP), mRNA.		51562	NM_001144891.1	7706610	NP_057670.1	14	14q13.3a	10.2938	13.4146	11.8542	2.20679	18.6161	24.3189	48.5988	36.4588	17.1685	47.0901	2.0515	4.09971	3.0756	1.4483	0.182121	0		2.41558
24510	GTTGCATGACGTACTGTG	GTTTACCATTCGGGAGCCTTT	TAGAAGACGCACCGGGTTTACCATTTGGGAGTCTTTGTTAATATTCATAGCAAAGGCTCCCGAATGGTAAACTTTTTTGGCAAGCAAAAGACGGCATACGAGATCCCACAGTACGTCATGCAACTTCGCCGTCTTCGT	CLL-H-051984	TP53I11	Homo sapiens tumor protein p53 inducible protein 11 (TP53I11), mRNA.	PIG11	9537	NM_001076787.1	33695116	NP_006025.2	11	11p11.2d	26.1005	23.7456	24.923	1.66516	6.68121	130.885	22.2891	76.5869	76.7886	100.263	5.25155	0.894317	3.07294	3.08103	0.441869	0		2.41234
3196	GTGTCATGACTGCAACCA	CCTCATGTGATCATGAAGTAA	TAGAAGACGCACCGGCCTCATGTGATTATGAAGTAAGTTAATATTCATAGCTTACTTCATGATCACATGAGGTTTTTTGGCAAGCAAAAGACGGCATACGAGATCCTGGTTGCAGTCATGACACTTCGCCGTCTTCGT	CLL-H-030670	CENPJ	Homo sapiens centromere protein J (CENPJ), mRNA.	MGC131581; LAP; LIP1; MCPH6; BM032; MGC142222; MGC131582; CPAP; MGC142224	55835	NM_018451.3	130980074	NP_060921.3	13	13q12.12b	13.0899	7.45489	10.2724	3.98458	38.7891	3.50346	59.596	31.5497	39.6634	125.717	0.341056	5.80156	3.07131	3.86116	0.529118	0		2.41037
18065	GTGTACTGCAGTTGTGGT	GACGAAACTCAGCGGAAATAT	TAGAAGACGCACCGGGACGAAACTCAGTGGAAATATGTTAATATTCATAGCATATTTCCGCTGAGTTTCGTCTTTTTTGGCAAGCAAAAGACGGCATACGAGATCCACCACAACTGCAGTACACTTCGCCGTCTTCGT	CLL-H-045539	PRPF18	Homo sapiens PRP18 pre-mRNA processing factor 18 homolog (S. cerevisiae) (PRPF18), mRNA.	PRP18; FLJ10210; hPrp18	8559	NM_003675.3	91208421	NP_003666.1	10	10p13d	23.172	35.717	29.4445	8.87066	30.1267	99.3172	81.4288	90.373	12.649	13.9964	3.37303	2.7655	3.06927	0.429587	0.0306764	0		2.40789
2823	TGACTGCACAGTGTACAC	CCTCGCAACTTTGTGGTAGAT	TAGAAGACGCACCGGCCTCGTAACTTTGTGGTAGGTGTTAATATTCATAGCATCTACCACAAAGTTGCGAGGTTTTTTGGCAAGCAAAAGACGGCATACGAGATCCGTGTACACTGTGCAGTCATTCGCCGTCTTCGT	CLL-H-030297	CCL4L1	Homo sapiens chemokine (C-C motif) ligand 4-like 1 (CCL4L1), mRNA.	LAG-1; AT744.2; LAG1; SCYA4L; CCL4L	9560	NM_001001435.2	48949791	NP_001001435.1	17	17q12b	31.7634	30.6294	31.1964	0.801828	2.57026	159.867	31.6325	95.7496	90.6753	94.7005	5.12453	1.01398	3.06925	2.9066	0.420056	0		2.40787
498	GTACTGTGTGCATGTGCA	CCCTCATCATTTGTGTGCCAA	TAGAAGACGCACCGGCCCTCATTATTTGTGTGCTAAGTTAATATTCATAGCTTGGCACACAAATGATGAGGGTTTTTTGGCAAGCAAAAGACGGCATACGAGATCCTGCACATGCACACAGTACTTCGCCGTCTTCGT	CLL-H-027972	AGBL4	Homo sapiens ATP/GTP binding protein-like 4 (AGBL4), mRNA.	FLJ14442	84871	NM_032785.3	14249449	NP_116174.1	1	1p33c-p33b	28.9319	52.5061	40.719	16.6694	40.9378	94.5573	155.349	124.953	42.9861	34.4018	2.32219	3.81514	3.06867	1.05568	0.122802	0		2.40716
97	CAGTACTGACCAACTGTG	CCTCAGTTGACTCCACAGATA	TAGAAGACGCACCGGCCTCAGTTGATTCCATAGATAGTTAATATTCATAGCTATCTGTGGAGTCAACTGAGGTTTTTTGGCAAGCAAAAGACGGCATACGAGATCCCACAGTTGGTCAGTACTGTTCGCCGTCTTCGT	CLL-H-027571	ABI1	Homo sapiens abl-interactor 1 (ABI1), transcript variant 1, mRNA.	SSH3BP1; SSH3BP; E3B1; ABI-1; NAP1BP	10006	NM_001012750.1	61743941	NP_005461.2	10	10p12.1b	3.24602	6.79038	5.0182	2.50624	49.9431	15.3911	15.398	15.3945	0.00489664	0.0318077	3.06705	3.06843	3.06774	0.000975777	0.0279523	0		2.40604
1693	GTTGTGACTGACCACACA	CAGGGCAAGACTCTGTCTCAA	TAGAAGACGCACCGGCAGGGCAAGACTTTGTCTTAAGTTAATATTCATAGCTTGAGACAGAGTCTTGCCCTGTTTTTTGGCAAGCAAAAGACGGCATACGAGATCCTGTGTGGTCAGTCACAACTTCGCCGTCTTCGT	CLL-H-029167	BIVM	Homo sapiens basic, immunoglobulin-like variable motif containing (BIVM), mRNA.	MGC133326	54841	NM_001159596.1	22095354	NP_060163.2	13	13q33.1b	10.0909	10.7047	10.3978	0.434044	4.17438	28.3297	35.3299	31.8298	4.94984	15.551	2.72459	3.39782	3.06121	0.476047	0.0258382	0		2.3981
27289	ACGTGTACCACAACACTG	CCCAGTTTGTGTGCCGAGAGT	TAGAAGACGCACCGGCCCAGTTTGTGTGCTGAGGGTGTTAATATTCATAGCACTCTCGGCACACAAACTGGGTTTTTTGGCAAGCAAAAGACGGCATACGAGATCCCAGTGTTGTGGTACACGTTTCGCCGTCTTCGT	CLL-H-054763	ZNF668	Homo sapiens zinc finger protein 668 (ZNF668), mRNA.	FLJ13479; FLJ14492	79759	NM_001172668.1	39725704	NP_078982.2	16	16p11.2c	10.8054	3.13562	6.97049	5.42333	77.8041	21.6128	21.0344	21.3236	0.40893	1.91773	3.10061	3.01764	3.05912	0.0586658	0.0648825	0		2.39558
22884	CACAACCAGTGTTGACCA	GCTGATGTTCAGGCAGTCTTA	TAGAAGACGCACCGGGCTGATGTTTAGGTAGTCTTAGTTAATATTCATAGCTAAGACTGCCTGAACATCAGCTTTTTTGGCAAGCAAAAGACGGCATACGAGATCCTGGTCAACACTGGTTGTGTTCGCCGTCTTCGT	CLL-H-050358	ST7	Homo sapiens suppression of tumorigenicity 7 (ST7), transcript variant a, mRNA.	DKFZp762O2113; RAY1; TSG7; ETS7q; FAM4A1; SEN4; HELG	7982	NM_018412.3	54112123	NP_060882.2	7	7q31.2c	24.2305	33.9831	29.1068	6.89612	23.6925	66.1672	111.873	89.0202	32.319	36.3053	2.27326	3.84354	3.0584	1.11036	0.124366	0		2.3947
3648	ACACACACCACAGTCATG	GTGGTAACCTGACTCTTCTAA	TAGAAGACGCACCGGGTGGTAACCTGATTCTTCTAAGTTAATATTCATAGCTTAGAAGAGTCAGGTTACCACTTTTTTGGCAAGCAAAAGACGGCATACGAGATCCCATGACTGTGGTGTGTGTTTCGCCGTCTTCGT	CLL-H-031122	CLP1	Homo sapiens CLP1, cleavage and polyadenylation factor I subunit, homolog (S. cerevisiae) (CLP1), mRNA.	HEAB; hClp1	10978	NM_001142597.1	5803028	NP_006822.1	11	11q12.1a	48.4698	40.6592	44.5645	5.52289	12.393	43.8296	228.461	136.145	130.554	95.8932	0.983508	5.12652	3.05501	2.92955	0.42607	0		2.39059
7647	CACAGTCAACACTGACAC	CCTGCATATCCTCAATCGCTA	TAGAAGACGCACCGGCCTGCATATCCTTAATCGTTAGTTAATATTCATAGCTAGCGATTGAGGATATGCAGGTTTTTTGGCAAGCAAAAGACGGCATACGAGATCCGTGTCAGTGTTGACTGTGTTCGCCGTCTTCGT	CLL-H-035121	GLYCTK	Homo sapiens glycerate kinase (GLYCTK), mRNA.	HBeAgBP4A; HBEBP2; HBEBP4; GLYCTK1	132158	NM_001144951.1	31543062	NP_660305.2	3	3p21.1d	7.30354	6.61388	6.95871	0.48767	7.00805	32.2198	10.2939	21.2568	15.504	72.9365	4.63014	1.47928	3.05471	2.228	0.32224	0		2.39022
6831	CACAACCACAACTGTGCA	GCTCTGATGGTCACAGTGTTA	TAGAAGACGCACCGGGCTCTGATGGTCATAGTGTTGGTTAATATTCATAGCTAACACTGTGACCATCAGAGCTTTTTTGGCAAGCAAAAGACGGCATACGAGATCCTGCACAGTTGTGGTTGTGTTCGCCGTCTTCGT	CLL-H-034305	FKBP15	Homo sapiens FK506 binding protein 15, 133kDa (FKBP15), mRNA.	FKBP133; KIAA0674	23307	NM_015258.1	150010551	NP_056073.1	9	9q32b-q32c	7.77986	9.88447	8.83217	1.48818	16.8496	35.4696	18.4301	26.9498	12.0487	44.708	4.01595	2.0867	3.05133	1.36419	0.169261	0		2.38611
9302	CAACTGTGACGTGTACAC	CGCATTCAGTTGCATCTCAAA	TAGAAGACGCACCGGCGCATTCAGTTGCATCTTAAAGTTAATATTCATAGCTTTGAGATGCAACTGAATGCGTTTTTTGGCAAGCAAAAGACGGCATACGAGATCCGTGTACACGTCACAGTTGTTCGCCGTCTTCGT	CLL-H-036776	INPP5F	Homo sapiens inositol polyphosphate-5-phosphatase F (INPP5F), transcript variant 2, non-coding RNA.	SAC2; hSAC2; FLJ13081; MGC59773; MSTPO47; MSTP007; KIAA0966; MGC131851	22876	NM_014937.2	117190489		10	10q26.11d	13.4163	12.7086	13.0625	0.500409	3.8309	54.9923	24.6653	39.8288	21.4444	53.8415	4.20995	1.88826	3.04911	1.64168	0.21966	0		2.38342
727	GTACACCATGACTGTGAC	CGACACATCGAAATCCGAGAT	TAGAAGACGCACCGGCGACACATTGAAATCTGAGATGTTAATATTCATAGCATCTCGGATTTCGATGTGTCGTTTTTTGGCAAGCAAAAGACGGCATACGAGATCCGTCACAGTCATGGTGTACTTCGCCGTCTTCGT	CLL-H-028201	AMOT	Homo sapiens angiomotin (AMOT), transcript variant 2, mRNA.	KIAA1071	154796	NM_001113490.1	63252911	NP_573572.1	X	Xq23b	62.1419	62.0687	62.1053	0.0517585	0.0833399	312.098	66.354	189.226	173.767	91.8306	5.02531	1.06841	3.04686	2.79795	0.409569	0		2.3807
5631	ACCAACGTCAACACACGT	CGCGCACACCTTCACCAACAT	TAGAAGACGCACCGGCGCGCACACCTTTACCAATATGTTAATATTCATAGCATGTTGGTGAAGGTGTGCGCGTTTTTTGGCAAGCAAAAGACGGCATACGAGATCCACGTGTGTTGACGTTGGTTTCGCCGTCTTCGT	CLL-H-033105	EEPD1	Homo sapiens endonuclease/exonuclease/phosphatase family domain containing 1 (EEPD1), mRNA.		80820	NM_030636.2	71043965	NP_085139.2	7	7p14.2a	36.4913	35.852	36.1716	0.452039	1.24971	170.377	49.996	110.187	85.1223	77.2529	4.71024	1.38219	3.04622	2.35329	0.343849	0		2.37991
14773	CACACAGTGTCAGTACCA	GCCCTCATGATTCTCCTGATT	TAGAAGACGCACCGGGCCCTTATGATTCTCTTGATTGTTAATATTCATAGCAATCAGGAGAATCATGAGGGCTTTTTTGGCAAGCAAAAGACGGCATACGAGATCCTGGTACTGACACTGTGTGTTCGCCGTCTTCGT	CLL-H-042247	OR2T12	Homo sapiens olfactory receptor, family 2, subfamily T, member 12 (OR2T12), mRNA.	OR1-57	127064	NM_001004692.1	52317212	NP_001004692.1	1	1q44f	28.2263	41.5937	34.91	9.45221	27.0759	100.501	112.13	106.315	8.22273	7.73428	2.87887	3.21197	3.04542	0.235541	0.0150453	0		2.37894
8628	GTGTTGGTCAACTGACGT	CCAACAACAACATCTCAGATT	TAGAAGACGCACCGGCCAACAACAACATCTTAGATTGTTAATATTCATAGCAATCTGAGATGTTGTTGTTGGTTTTTTGGCAAGCAAAAGACGGCATACGAGATCCACGTCAGTTGACCAACACTTCGCCGTCTTCGT	CLL-H-036102	HEY2	Homo sapiens hairy/enhancer-of-split related with YRPW motif 2 (HEY2), mRNA.	GRL; HERP1	23493	NM_012259.2	6912413	NP_036391.1	6	6q22.31e	6.55378	17.5989	12.0764	7.8101	64.6726	44.8323	28.6764	36.7543	11.4239	31.0818	3.7124	2.37459	3.0435	0.945973	0.127777	0		2.37661
9578	CAACCAGTCAGTCAACTG	CCACTAGCAACGATGTTAGTT	TAGAAGACGCACCGGCCACTAGCAATGATGTTAGTTGTTAATATTCATAGCAACTAACATCGTTGCTAGTGGTTTTTTGGCAAGCAAAAGACGGCATACGAGATCCCAGTTGACTGACTGGTTGTTCGCCGTCTTCGT	CLL-H-037052	JARID2	Homo sapiens jumonji, AT rich interactive domain 2 (JARID2), mRNA.	JMJ	3720	NM_004973.2	11863151	NP_004964.2	6	6p23a-p22.3f	9.7557	3.75859	6.75715	4.2406	62.7572	0.0483237	41.0709	20.5596	29.0073	141.089	0.00715149	6.07814	3.04264	4.29283	0.57403	0		2.37558
22239	ACCATGGTCAGTACTGGT	CGAGTAGAGACTTATCTCAAT	TAGAAGACGCACCGGCGAGTAGAGACTTATCTTAATGTTAATATTCATAGCATTGAGATAAGTCTCTACTCGTTTTTTGGCAAGCAAAAGACGGCATACGAGATCCACCAGTACTGACCATGGTTTCGCCGTCTTCGT	CLL-H-049713	SMC3	Homo sapiens structural maintenance of chromosomes 3 (SMC3), mRNA.	CDLS3; SMC3L1; SMC3; CSPG6; BMH; HCAP; BAM	9126	NM_005445.3	63054826	NP_005436.1	10	10q25.2a	11.758	2.88643	7.32222	6.27315	85.6728	26.0223	18.5346	22.2785	5.29457	23.7654	3.55388	2.53129	3.04258	0.723082	0.123361	0		2.3755
8756	GTGTCAGTCACAACACAC	GCTCATGAACACTCTCCTGAA	TAGAAGACGCACCGGGCTCATGAATACTCTCTTGAAGTTAATATTCATAGCTTCAGGAGAGTGTTCATGAGCTTTTTTGGCAAGCAAAAGACGGCATACGAGATCCGTGTGTTGTGACTGACACTTCGCCGTCTTCGT	CLL-H-036230	HMG20B	Homo sapiens high-mobility group 20B (HMG20B), mRNA.	SMARCE1r; FLJ26127; HMGX2; pp8857; PP7706; BRAF35; SOXL; BRAF25	10362	NM_006339.2	5454079	NP_006330.1	19	19p13.3e	13.6986	29.1239	21.4112	10.9074	50.9423	111.012	19.1049	65.0582	64.9878	99.8917	5.18473	0.892286	3.03851	3.03522	0.447791	0		2.37056
13051	TGACGTTGCATGTGACAC	GCCGACTCTTTGCAGTGAATA	TAGAAGACGCACCGGGCCGATTCTTTGTAGTGAATAGTTAATATTCATAGCTATTCACTGCAAAGAGTCGGCTTTTTTGGCAAGCAAAAGACGGCATACGAGATCCGTGTCACATGCAACGTCATTCGCCGTCTTCGT	CLL-H-040525	NBEA	Homo sapiens neurobeachin (NBEA), mRNA.	BCL8B; LYST2	26960	NM_015678.4	62422576	NP_056493.3	13	13q13.2b-q13.3a	24.2658	30.9305	27.5981	4.71269	17.0761	86.5718	81.1057	83.8388	3.86515	4.61021	3.13687	2.93881	3.03784	0.140051	0.00582116	0		2.36975
26074	GTCAGTGTCACAACTGTG	CACCGAAATGTTGTATTCTTA	TAGAAGACGCACCGGCACCGAAATGTTGTATTCTTAGTTAATATTCATAGCTAAGAATACAACATTTCGGTGTTTTTTGGCAAGCAAAAGACGGCATACGAGATCCCACAGTTGTGACACTGACTTCGCCGTCTTCGT	CLL-H-053548	VRK2	Homo sapiens vaccinia related kinase 2 (VRK2), mRNA.		7444	NM_001130480.1	71164883	NP_006287.2	2	2p16.1b	11.1053	13.0824	12.0938	1.39804	11.5599	16.0676	57.3908	36.7292	29.2199	79.555	1.32858	4.74547	3.03702	2.4161	0.355849	0		2.36875
8036	CAGTACCACAGTTGTGAC	AGGGCTGATGAACCTCTACAT	TAGAAGACGCACCGGAGGGCTGATGAATCTCTATATGTTAATATTCATAGCATGTAGAGGTTCATCAGCCCTTTTTTTGGCAAGCAAAAGACGGCATACGAGATCCGTCACAACTGTGGTACTGTTCGCCGTCTTCGT	CLL-H-035510	GPR182	Homo sapiens G protein-coupled receptor 182 (GPR182), mRNA.	7TMR; ADMR; hrhAMR; AMR; gamrh; MGC34399	11318	NM_007264.3	46397401	NP_009195.1	12	12q13.3a	17.9766	24.0259	21.0013	4.27751	20.3679	49.0606	78.4823	63.7715	20.8043	32.6232	2.33608	3.73703	3.03655	0.990622	0.104357	0		2.36819
21531	CATGACTGCACATGACGT	GCCTCTTTCGACGAATTATTT	TAGAAGACGCACCGGGCCTCTTTCGATGAATTATTTGTTAATATTCATAGCAAATAATTCGTCGAAAGAGGCTTTTTTGGCAAGCAAAAGACGGCATACGAGATCCACGTCATGTGCAGTCATGTTCGCCGTCTTCGT	CLL-H-049005	SLC25A24	Homo sapiens solute carrier family 25 (mitochondrial carrier; phosphate carrier), member 24 (SLC25A24), nuclear gene encoding mitochondrial protein, transcript variant 1, mRNA.	DKFZp586G0123; APC1; SCAMC-1	29957	NM_013386.3	148491090	NP_037518.3	1	1p13.3c	32.963	51.3017	42.1323	12.9674	30.7778	224.705	31.1477	127.926	136.866	106.988	5.33332	0.739283	3.0363	3.24847	0.470579	0		2.36788
237	TGCATGGTTGTGGTACAC	GATCTCCCAATTAGCCTCAAA	TAGAAGACGCACCGGGATCTCCCAATTAGCCTTAAAGTTAATATTCATAGCTTTGAGGCTAATTGGGAGATCTTTTTTGGCAAGCAAAAGACGGCATACGAGATCCGTGTACCACAACCATGCATTCGCCGTCTTCGT	CLL-H-027711	ADAM15	Homo sapiens ADAM metallopeptidase domain 15 (ADAM15), transcript variant 4, mRNA.	MDC15	8751	NM_003815.3	46909595	NP_997078.1	1	1q21.3e-q22a	30.4226	41.7079	36.0653	7.97991	22.1263	61.9992	156.718	109.358	66.9759	61.2444	1.71908	4.34539	3.03224	1.85708	0.264169	0		2.36294
25486	GTGTACTGCAACCAACCA	GCAGATGCTGTGGGATTAGAA	TAGAAGACGCACCGGGCAGATGTTGTGGGATTAGAGGTTAATATTCATAGCTTCTAATCCCACAGCATCTGCTTTTTTGGCAAGCAAAAGACGGCATACGAGATCCTGGTTGGTTGCAGTACACTTCGCCGTCTTCGT	CLL-H-052960	TXNL1	Homo sapiens thioredoxin-like 1 (TXNL1), mRNA.	TXNL; TRP32; Txl; TXL-1	9352	NM_004786.2	4759273	NP_004777.1	18	18q21.31a	18.4088	33.9	26.1544	10.9539	41.8818	98.4836	59.596	79.0398	27.4977	34.7897	3.76547	2.27862	3.02204	1.05136	0.127377	0		2.35058
19724	GTACGTGTACGTACACAC	CGTTCGTTTCTCGTTGCCTAA	TAGAAGACGCACCGGCGTTCGTTTCTTGTTGCTTAAGTTAATATTCATAGCTTAGGCAACGAGAAACGAACGTTTTTTGGCAAGCAAAAGACGGCATACGAGATCCGTGTGTACGTACACGTACTTCGCCGTCTTCGT	CLL-H-047198	RIPK4	Homo sapiens receptor-interacting serine-threonine kinase 4 (RIPK4), mRNA.	MGC129992; ANKRD3; ANKK2; DIK; PKK; MGC129993; RIP4	54101	NM_020639.2	41327753	NP_065690.2	21	21q22.3a	12.1549	27.9922	20.0735	11.1986	55.7879	43.1047	77.9976	60.5511	24.673	40.7474	2.14734	3.88559	3.01646	1.22913	0.168997	0		2.3438
2212	CAACACTGTGCAGTTGGT	CTGACCACGGAAACAAGATCT	TAGAAGACGCACCGGCTGACCACGGAAATAAGATTTGTTAATATTCATAGCAGATCTTGTTTCCGTGGTCAGTTTTTTGGCAAGCAAAAGACGGCATACGAGATCCACCAACTGCACAGTGTTGTTCGCCGTCTTCGT	CLL-H-029686	C19ORF55	Homo sapiens chromosome 19 open reading frame 55 (C19orf55), mRNA.	DKFZp434C2231; MGC131952; FLJ30657	148137	NM_001039887.1	89941478	NP_001034976.1	19	19q13.12a	6.49204	17.5678	12.0299	7.83173	65.1022	32.244	40.3295	36.2867	5.71732	15.756	2.68032	3.35243	3.01637	0.475259	0.0714424	0		2.34369
18611	CAACCAACGTCAGTTGGT	GTCAGCCTTGCCTTGTTCAGA	TAGAAGACGCACCGGGTCAGCCTTGCTTTGTTTAGAGTTAATATTCATAGCTCTGAACAAGGCAAGGCTGACTTTTTTGGCAAGCAAAAGACGGCATACGAGATCCACCAACTGACGTTGGTTGTTCGCCGTCTTCGT	CLL-H-046085	PXDN	Homo sapiens peroxidasin homolog (Drosophila) (PXDN), mRNA. XM_935183 XM_935184 XM_936786 XM_942966 XM_942982 XM_942986 XM_942994 XM_943000	D2S448E; D2S448; VPO; MG50; KIAA0230; PXN; PRG2	7837	NM_012293.1	109150415	NP_036425.1	2	2p25.3e	3.33423	6.03244	4.68333	1.90792	40.7386	19.6194	8.62098	14.1202	7.77706	55.0776	4.1892	1.84078	3.01499	1.66058	0.237516	0		2.34201
10727	ACCATGGTACCAGTACAC	GATGACCTGAATCGGATTAAA	TAGAAGACGCACCGGGATGACCTGAATTGGATTAAAGTTAATATTCATAGCTTTAATCCGATTCAGGTCATCTTTTTTGGCAAGCAAAAGACGGCATACGAGATCCGTGTACTGGTACCATGGTTTCGCCGTCTTCGT	CLL-H-038201	LCN9	Homo sapiens lipocalin 9 (LCN9), mRNA.	9230102I19Rik	392399	NM_001001676.1	48717446	NP_001001676.1	9	9q34.3c	45.5942	45.4769	45.5356	0.0829769	0.182224	226.795	47.7718	137.283	126.588	92.2096	4.98061	1.04911	3.01486	2.77999	0.413153	0		2.34186
1216	CATGTGGTACACTGACGT	CCCGATGCCTTATCCAAATTA	TAGAAGACGCACCGGCCCGATGCCTTATCTAAATTAGTTAATATTCATAGCTAATTTGGATAAGGCATCGGGTTTTTTGGCAAGCAAAAGACGGCATACGAGATCCACGTCAGTGTACCACATGTTCGCCGTCTTCGT	CLL-H-028690	ASCL3	Homo sapiens achaete-scute complex homolog 3 (Drosophila) (ASCL3), mRNA.	SGN1	56676	NM_020646.1	10190679	NP_065697.1	11	11p15.4a	3.7929	5.86631	4.82961	1.46612	30.3569	16.0797	12.9362	14.508	2.22277	15.321	3.3294	2.67853	3.00396	0.460238	0.0358251	0		2.32863
27101	GTGTACTGACTGTGACAC	TCTACCTTATTCACCACCAAA	TAGAAGACGCACCGGTCTACCTTATTCACCATCAAAGTTAATATTCATAGCTTTGGTGGTGAATAAGGTAGATTTTTTGGCAAGCAAAAGACGGCATACGAGATCCGTGTCACAGTCAGTACACTTCGCCGTCTTCGT	CLL-H-054575	ZNF530	Homo sapiens zinc finger protein 530 (ZNF530), mRNA.	KIAA1508	348327	NM_020880.3	40254939	NP_065931.2	19	19q13.43b	6.72138	11.7222	9.22181	3.53614	38.3454	17.3361	38.0578	27.697	14.6524	52.9027	1.8799	4.12693	3.00342	1.58889	0.225161	0		2.32797
263	TGTGACGTCATGGTACAC	CGACCACATATAATCCAGAAA	TAGAAGACGCACCGGCGACCACATATAATCTAGAAAGTTAATATTCATAGCTTTCTGGATTATATGTGGTCGTTTTTTGGCAAGCAAAAGACGGCATACGAGATCCGTGTACCATGACGTCACATTCGCCGTCTTCGT	CLL-H-027737	ADAM23	Homo sapiens ADAM metallopeptidase domain 23 (ADAM23), mRNA.	MDC3	8745	NM_003812.2	73765550	NP_003803.1	2	2q33.3b	31.19	44.1894	37.6897	9.19196	24.3885	125.17	101.171	113.17	16.9704	14.9954	3.32107	2.6843	3.00269	0.450265	0.0311691	0		2.32708
4822	ACGTACCACAACTGTGAC	CCAATGAAGGAGAACCCTTAT	TAGAAGACGCACCGGCCAATGAAGGAGAACCTTTATGTTAATATTCATAGCATAAGGGTTCTCCTTCATTGGTTTTTTGGCAAGCAAAAGACGGCATACGAGATCCGTCACAGTTGTGGTACGTTTCGCCGTCTTCGT	CLL-H-032296	DENND2A	Homo sapiens DENN/MADD domain containing 2A (DENND2A), mRNA.	KIAA1277; FAM31D	27147	NM_015689.3	58866696	NP_056504.2	7	7q34c	21.4343	21.6379	21.5361	0.143927	0.668306	27.1941	102.083	64.6386	52.9545	81.9239	1.26272	4.74009	3.00141	2.45887	0.36873	0		2.32553
11890	ACCACACAGTGTACTGGT	GCTAGGCAATTGCAGTTAATA	TAGAAGACGCACCGGGCTAGGCAATTGTAGTTAATAGTTAATATTCATAGCTATTAACTGCAATTGCCTAGCTTTTTTGGCAAGCAAAAGACGGCATACGAGATCCACCAGTACACTGTGTGGTTTCGCCGTCTTCGT	CLL-H-039364	METTL2A	Homo sapiens methyltransferase like 2A (METTL2A), mRNA.	METTL2; FLJ12760	339175	NM_181725.3	52856441	NP_859076.2	17	17q23.2d	32.9983	19.2706	26.1344	9.70694	37.1424	94.2553	62.476	78.3656	22.4714	28.675	3.60656	2.39056	2.99856	0.859838	0.0945071	0		2.32207
3029	TGGTGTTGTGGTGTACTG	GCAGTTTGTGAGGAACAACAT	TAGAAGACGCACCGGGCAGTTTGTGAGGAATAACATGTTAATATTCATAGCATGTTGTTCCTCACAAACTGCTTTTTTGGCAAGCAAAAGACGGCATACGAGATCCCAGTACACCACAACACCATTCGCCGTCTTCGT	CLL-H-030503	CDH3	Homo sapiens cadherin 3, type 1, P-cadherin (placental) (CDH3), mRNA.	HJMD; PCAD; CDHP	1001	NM_001793.4	45269142	NP_001784.2	16	16q22.1c	48.8402	49.1005	48.9704	0.184023	0.375784	63.5818	230.048	146.815	117.709	80.1754	1.29837	4.6977	2.99804	2.40369	0.360767	0		2.32144
17222	TGACGTACGTTGCACAGT	CGCCTCATCCTCTACAATGAT	TAGAAGACGCACCGGCGCCTCATTCTCTATAATGATGTTAATATTCATAGCATCATTGTAGAGGATGAGGCGTTTTTTGGCAAGCAAAAGACGGCATACGAGATCCACTGTGCAACGTACGTCATTCGCCGTCTTCGT	CLL-H-044696	PLK1	Homo sapiens polo-like kinase 1 (Drosophila) (PLK1), mRNA.	PLK; STPK13	5347	NM_005030.3	34147632	NP_005021.2	16	16p12.1c	7.10067	3.02141	5.06104	2.88447	56.9937	16.3455	14.0008	15.1731	1.65795	10.9269	3.22967	2.76638	2.99803	0.327591	0.0500926	0		2.32143
23898	TGACGTACACTGGTACGT	CTTCTGAGGAAGTCATTCTTA	TAGAAGACGCACCGGCTTCTGAGGAAGTTATTCTTAGTTAATATTCATAGCTAAGAATGACTTCCTCAGAAGTTTTTTGGCAAGCAAAAGACGGCATACGAGATCCACGTACCAGTGTACGTCATTCGCCGTCTTCGT	CLL-H-051372	THEM4	Homo sapiens thioesterase superfamily member 4 (THEM4), mRNA.	CTMP; MGC29636	117145	NM_053055.3	76159292	NP_444283.2	1	1q21.3a	17.3239	21.3368	19.3303	2.83754	14.6792	71.3861	44.1695	57.7778	19.2451	33.3088	3.69296	2.28498	2.98897	0.99559	0.107712	0		2.31044
20041	ACTGGTTGGTTGACACGT	GCTGTAGTTCAGAAGAGGTTT	TAGAAGACGCACCGGGCTGTAGTTTAGAAGAGGTTTGTTAATATTCATAGCAAACCTCTTCTGAACTACAGCTTTTTTGGCAAGCAAAAGACGGCATACGAGATCCACGTGTCAACCAACCAGTTTCGCCGTCTTCGT	CLL-H-047515	RPS3	Homo sapiens ribosomal protein S3 (RPS3), mRNA.	FLJ27450; FLJ26283; MGC87870	6188	NM_001005.3	70609887	NP_000996.2	11	11q13.4c	39.9666	30.0895	35.0281	6.98418	19.9388	159.516	49.8724	104.694	77.53	74.0536	4.55396	1.42379	2.98887	2.21337	0.333117	0		2.31032
5611	CATGTGACCATGTGTGCA	TCCAAAGGCTGAGGGACATTT	TAGAAGACGCACCGGTCCAAAGGTTGAGGGATATTTGTTAATATTCATAGCAAATGTCCCTCAGCCTTTGGATTTTTTGGCAAGCAAAAGACGGCATACGAGATCCTGCACACATGGTCACATGTTCGCCGTCTTCGT	CLL-H-033085	EDN2	Homo sapiens endothelin 2 (EDN2), mRNA.	ET2	1907	NM_001956.3	31542584	NP_001947.1	1	1p34.2c	8.51198	15.6158	12.0639	5.02316	41.638	38.6831	33.3909	36.037	3.74216	10.3842	3.20652	2.76783	2.98718	0.310195	0.0324815	0		2.30826
3218	CACAACTGACACACACAC	ACAGTACACAAAGCCAAACCA	TAGAAGACGCACCGGACAGTACACAAAGCCAAATCAGTTAATATTCATAGCTGGTTTGGCTTTGTGTACTGTTTTTTTGGCAAGCAAAAGACGGCATACGAGATCCGTGTGTGTGTCAGTTGTGTTCGCCGTCTTCGT	CLL-H-030692	CENPN	Homo sapiens centromere protein N (CENPN), mRNA.	FLJ22660; C16orf60; CENP-N; FLJ13607; BM039	55839	NM_001100624.1	39725678	NP_060925.1	16	16q23.2b	56.8759	40.8254	48.8506	11.3495	23.233	117.294	174.121	145.707	40.1831	27.5779	2.40107	3.56436	2.98271	0.82257	0.0816985	0		2.30284
21143	ACGTACTGTGACTGTGAC	GCTGGAGAAAGACCAGATCAA	TAGAAGACGCACCGGGCTGGAGAAAGATCAGATTAAGTTAATATTCATAGCTTGATCTGGTCTTTCTCCAGCTTTTTTGGCAAGCAAAAGACGGCATACGAGATCCGTCACAGTCACAGTACGTTTCGCCGTCTTCGT	CLL-H-048617	SHROOM2	Homo sapiens shroom family member 2 (SHROOM2), mRNA.	APXL; DKFZp781J074; FLJ39277; HSAPXL	357	NM_001649.2	18375508	NP_001640.1	X	Xp22.2	27.4941	40.5346	34.0144	9.22103	27.1092	112.28	90.2684	101.274	15.5645	15.3687	3.30096	2.65383	2.97739	0.457586	0.0343212	0		2.29638
17392	TGTGGTACACTGCAACGT	GCAGCAGAAGATTTCTTGATA	TAGAAGACGCACCGGGCAGTAGAAGATTTCTTGATAGTTAATATTCATAGCTATCAAGAAATCTTCTGCTGCTTTTTTGGCAAGCAAAAGACGGCATACGAGATCCACGTTGCAGTGTACCACATTCGCCGTCTTCGT	CLL-H-044866	PNN	Homo sapiens pinin, desmosome associated protein (PNN), mRNA.	SDK3; DRS; memA; pinin	5411	NM_002687.3	133908618	NP_002678.2	14	14q21.1b	13.2752	22.2089	17.742	6.31712	35.6054	45.9437	59.5104	52.7271	9.59313	18.1939	2.58954	3.35421	2.97187	0.540701	0.0498972	0		2.28968
14680	CACAGTTGGTCAGTACGT	CTTACATGACACCCAAGTCTT	TAGAAGACGCACCGGCTTACATGACACCTAAGTCTTGTTAATATTCATAGCAAGACTTGGGTGTCATGTAAGTTTTTTGGCAAGCAAAAGACGGCATACGAGATCCACGTACTGACCAACTGTGTTCGCCGTCTTCGT	CLL-H-042154	OR2D2	Homo sapiens olfactory receptor, family 2, subfamily D, member 2 (OR2D2), mRNA.	hg27; OR2D1; OR11-610	120776	NM_003700.1	50053005	NP_003691.1	11	11p15.4b	0.37047	2.13887	1.25467	1.25045	99.6635	0.0241618	7.43287	3.72851	5.23874	140.505	0.0192575	5.92417	2.97171	4.1754	0.582606	0		2.28949
19751	CACAGTTGGTCAACTGCA	GCATATCTAGATGTAGACTTT	TAGAAGACGCACCGGGCATATCTAGATGTAGACTTTGTTAATATTCATAGCAAAGTCTACATCTAGATATGCTTTTTTGGCAAGCAAAAGACGGCATACGAGATCCTGCAGTTGACCAACTGTGTTCGCCGTCTTCGT	CLL-H-047225	RMI1	Homo sapiens RMI1, RecQ mediated genome instability 1, homolog (S. cerevisiae) (RMI1), mRNA.	BLAP75; FLJ12888; C9orf76; RP11-346I8.1	80010	NM_024945.2	13376426	NP_079221.1	9	9q21.32c	15.4274	6.3543	10.8909	6.41566	58.9086	29.8761	34.8261	32.3511	3.50019	10.8194	2.74323	3.19774	2.97048	0.321388	0.0533869	0		2.288
8948	ACGTTGGTTGGTTGACAC	GTGTAGTCTATACATCAGATT	TAGAAGACGCACCGGGTGTAGTCTATACATCAGATTGTTAATATTCATAGCAATCTGATGTATAGACTACACTTTTTTGGCAAGCAAAAGACGGCATACGAGATCCGTGTCAACCAACCAACGTTTCGCCGTCTTCGT	CLL-H-036422	HSD17B11	Homo sapiens hydroxysteroid (17-beta) dehydrogenase 11 (HSD17B11), mRNA.	17-BETA-HSDXI; DHRS8; PAN1B; 17-BETA-HSD11; RETSDR2	51170	NM_016245.3	142976728	NP_057329.2	4	4q22.1a	25.483	45.5288	35.5059	14.1745	39.9215	179.208	31.661	105.435	104.332	98.9539	5.04728	0.89171	2.96949	2.93843	0.446751	0		2.2868
1777	GTACTGCAGTACTGACGT	GCCGAAATAGTAGCTGGAGTT	TAGAAGACGCACCGGGCCGAAGTAGTAGTTGGAGTTGTTAATATTCATAGCAACTCCAGCTACTATTTCGGCTTTTTTGGCAAGCAAAAGACGGCATACGAGATCCACGTCAGTACTGCAGTACTTCGCCGTCTTCGT	CLL-H-029251	BRD8	Homo sapiens bromodomain containing 8 (BRD8), transcript variant 3, mRNA.	SMAP; p120; SMAP2	10902	NM_001164326.1	34452708	NP_899203.1	5	5q31.2c	16.8211	6.98766	11.9044	6.95328	58.4095	39.1784	31.4994	35.3389	5.42989	15.3652	3.29109	2.64603	2.96856	0.456125	0.0641218	0		2.28567
25651	CAACCAGTCAGTGTTGTG	CACACCCAAGAGCACACACAT	TAGAAGACGCACCGGCACACCCAAGAGTACACATATGTTAATATTCATAGCATGTGTGTGCTCTTGGGTGTGTTTTTTGGCAAGCAAAAGACGGCATACGAGATCCCACAACACTGACTGGTTGTTCGCCGTCTTCGT	CLL-H-053125	UGCGL1	Homo sapiens UDP-glucose ceramide glucosyltransferase-like 1 (UGCGL1), transcript variant 1, mRNA.	FLJ23796; HUGT1; FLJ23671	56886	NM_001025777.1	71061444	NP_064505.1	2	2q14.3e	23.0926	34.9694	29.031	8.39819	28.9283	106.433	65.9073	86.1701	28.6559	33.2551	3.66618	2.27024	2.96821	0.987079	0.11373	0		2.28523
23428	ACGTACCATGCAACACAC	CCTCAGCATGACCTTCTATTT	TAGAAGACGCACCGGCCTCAGCATGACTTTCTATTTGTTAATATTCATAGCAAATAGAAGGTCATGCTGAGGTTTTTTGGCAAGCAAAAGACGGCATACGAGATCCGTGTGTTGCATGGTACGTTTCGCCGTCTTCGT	CLL-H-050902	TAS1R2	Homo sapiens taste receptor, type 1, member 2 (TAS1R2), mRNA.	T1R2; GPR71; TR2	80834	NM_152232.2	112789565	NP_689418.2	1	1p36.13b	7.15359	10.6217	8.88762	2.45229	27.5922	36.9193	15.8257	26.3725	14.9154	56.5566	4.15401	1.78065	2.96733	1.67822	0.243499	0		2.28417
22184	CATGGTGTACGTCAACTG	GCCTTCAATAAGCTCCACAAA	TAGAAGACGCACCGGGCCTTCAATAAGCTCCATAAAGTTAATATTCATAGCTTTGTGGAGCTTATTGAAGGCTTTTTTGGCAAGCAAAAGACGGCATACGAGATCCCAGTTGACGTACACCATGTTCGCCGTCTTCGT	CLL-H-049658	SLITRK4	Homo sapiens SLIT and NTRK-like family, member 4 (SLITRK4), mRNA.	DKFZp547M2010	139065	NM_173078.2	40217821	NP_775101.1	X	Xq27.3a	12.7195	45.5807	29.1501	23.2364	79.713	71.0599	101.883	86.4717	21.7955	25.2054	2.43773	3.49514	2.96643	0.747701	0.125929	0		2.28308
14487	CAGTACCAACTGGTTGAC	CAGCCTTCACATGCCCATGTA	TAGAAGACGCACCGGCAGCCTTCATATGCCTATGTAGTTAATATTCATAGCTACATGGGCATGTGAAGGCTGTTTTTTGGCAAGCAAAAGACGGCATACGAGATCCGTCAACCAGTTGGTACTGTTCGCCGTCTTCGT	CLL-H-041961	OR14C36	Homo sapiens olfactory receptor, family 14, subfamily C, member 36 (OR14C36), mRNA.		127066	NM_001001918.1	50054469	NP_001001918.1	1	1q44f	1.63183	10.0921	5.86198	5.98234	102.053	18.6408	16.1109	17.3759	1.78896	10.2957	3.17996	2.74837	2.96416	0.30518	0.120945	0		2.28033
23705	CATGACGTCATGACTGGT	GCTGTGGTTGGTGTTAAGTCT	TAGAAGACGCACCGGGCTGTGGTTGGTGTTGAGTTTGTTAATATTCATAGCAGACTTAACACCAACCACAGCTTTTTTGGCAAGCAAAAGACGGCATACGAGATCCACCAGTCATGACGTCATGTTCGCCGTCTTCGT	CLL-H-051179	TCTA	Homo sapiens T-cell leukemia translocation altered gene (TCTA), mRNA.		6988	NM_022171.2	148922970	NP_071503.1	3	3p21.31d	8.22972	6.76962	7.49967	1.03245	13.7666	18.3751	26.0435	22.2093	5.42243	24.4151	2.45012	3.47263	2.96137	0.723023	0.0637489	0		2.27694
9319	CACAGTCAGTCACAACAC	GCCTTAGGTACGACATCAGAA	TAGAAGACGCACCGGGCCTTAGGTATGACATTAGAAGTTAATATTCATAGCTTCTGATGTCGTACCTAAGGCTTTTTTGGCAAGCAAAAGACGGCATACGAGATCCGTGTTGTGACTGACTGTGTTCGCCGTCTTCGT	CLL-H-036793	INSL4	Homo sapiens insulin-like 4 (placenta) (INSL4), mRNA.	EPIL; PLACENTIN	3641	NM_002195.1	4504710	NP_002186.1	9	9p24.1c	10.0821	3.51979	6.80093	4.64023	68.2294	12.9991	27.2792	20.1391	10.0976	50.1391	1.91137	4.0111	2.96123	1.48473	0.23171	0		2.27677
17030	GTTGGTTGCATGTGTGGT	TGGCCATCCTAGCTCGAAATT	TAGAAGACGCACCGGTGGCCATCTTAGCTTGAAATTGTTAATATTCATAGCAATTTCGAGCTAGGATGGCCATTTTTTGGCAAGCAAAAGACGGCATACGAGATCCACCACACATGCAACCAACTTCGCCGTCTTCGT	CLL-H-044504	PKD1L1	Homo sapiens polycystic kidney disease 1 like 1 (PKD1L1), mRNA.	PRO19563	168507	NM_138295.2	33359209	NP_612152.1	7	7p12.3b	24.2569	39.9636	32.1103	11.1063	34.5879	52.5399	137.546	95.043	60.1084	63.2434	1.63623	4.28355	2.95989	1.87194	0.282671	0		2.27514
25525	ACTGACACTGACACACGT	GAGATGCAGGAACACTATGAT	TAGAAGACGCACCGGGAGATGCAGGAACATTATGATGTTAATATTCATAGCATCATAGTGTTCCTGCATCTCTTTTTTGGCAAGCAAAAGACGGCATACGAGATCCACGTGTGTCAGTGTCAGTTTCGCCGTCTTCGT	CLL-H-052999	U2AF1	Homo sapiens U2 small nuclear RNA auxiliary factor 1 (U2AF1), transcript variant b, mRNA.	DKFZp313J1712; U2AFBP; U2AF35; RN; RNU2AF1; FP793	7307	NM_001025203.1	68800127	NP_001020374.1	21	21q22.3c	37.6909	40.1505	38.9207	1.7392	4.46858	95.5479	134.647	115.097	27.6472	24.0207	2.45494	3.45952	2.95723	0.710348	0.0602114	0		2.27191
1049	ACTGGTGTGTCAACACGT	GCTCTCAAATTAGATCAAGAA	TAGAAGACGCACCGGGCTCTCAAATTAGATCAAGAAGTTAATATTCATAGCTTCTTGATCTAATTTGAGAGCTTTTTTGGCAAGCAAAAGACGGCATACGAGATCCACGTGTTGACACACCAGTTTCGCCGTCTTCGT	CLL-H-028523	ARID4A	Homo sapiens AT rich interactive domain 4A (RBP1-like) (ARID4A), transcript variant 3, mRNA.	RBP1; RBP-1; RBBP1	5926	NM_002892.3	115334678	NP_075377.2	14	14q23.1b	24.8744	36.9318	30.9031	8.52587	27.5891	24.1014	158.162	91.1318	94.7953	104.02	0.779903	5.11801	2.94896	3.0675	0.465269	0		2.26187
12243	GTGTACACTGTGGTACTG	ACTCATGTACTACGCCCTCAA	TAGAAGACGCACCGGACTCATGTACTATGCCCTTAAGTTAATATTCATAGCTTGAGGGCGTAGTACATGAGTTTTTTTGGCAAGCAAAAGACGGCATACGAGATCCCAGTACCACAGTGTACACTTCGCCGTCTTCGT	CLL-H-039717	MMP17	PREDICTED: Homo sapiens matrix metallopeptidase 17 (membrane-inserted), transcript variant 1 (MMP17), mRNA.		4326	NM_016155.4	89036491	XP_947808.1		12q24.33c	11.7756	26.7047	19.2402	10.5564	54.8666	79.9998	33.4289	56.7143	32.9306	58.064	4.15796	1.73745	2.94771	1.71156	0.265096	0		2.26035
5873	CAACCAACACTGGTACGT	CGATACCATCTCTTCCTATTT	TAGAAGACGCACCGGCGATACCATCTCTTCTTATTTGTTAATATTCATAGCAAATAGGAAGAGATGGTATCGTTTTTTGGCAAGCAAAAGACGGCATACGAGATCCACGTACCAGTGTTGGTTGTTCGCCGTCTTCGT	CLL-H-033347	ENPP4	Homo sapiens ectonucleotide pyrophosphatase/phosphodiesterase 4 (putative function) (ENPP4), mRNA.	KIAA0879; NPP4	22875	NM_014936.4	54124344	NP_055751.1	6	6p12.3e	13.3634	16.5918	14.9776	2.28284	15.2417	27.5686	60.7271	44.1479	23.4466	53.1092	1.84066	4.05453	2.9476	1.56544	0.222017	0		2.26022
24301	ACACTGCATGACGTACAC	GAGGAGGCAGAAGTATGATTT	TAGAAGACGCACCGGGAGGAGGTAGAAGTATGATTTGTTAATATTCATAGCAAATCATACTTCTGCCTCCTCTTTTTTGGCAAGCAAAAGACGGCATACGAGATCCGTGTACGTCATGCAGTGTTTCGCCGTCTTCGT	CLL-H-051775	TMPRSS6	Homo sapiens transmembrane protease, serine 6 (TMPRSS6), mRNA.		164656	NM_153609.2	56682967	NP_705837.1	22	22q12.3d	67.0726	59.7429	63.4078	5.1829	8.17392	268.667	104.935	186.801	115.777	61.9786	4.23714	1.65492	2.94603	1.82591	0.271086	0		2.25831
14444	CAACTGACGTTGGTTGGT	CCTCGACGTTTGCTACACAAG	TAGAAGACGCACCGGCCTCGATGTTTGCTACATAAGGTTAATATTCATAGCCTTGTGTAGCAAACGTCGAGGTTTTTTGGCAAGCAAAAGACGGCATACGAGATCCACCAACCAACGTCAGTTGTTCGCCGTCTTCGT	CLL-H-041918	OR13C8	Homo sapiens olfactory receptor, family 13, subfamily C, member 8 (OR13C8), mRNA.	OR37H; OR9-10	138802	NM_001004483.1	52218863	NP_001004483.1	9	9q31.1d	3.7929	15.9584	9.87567	8.60233	87.1063	20.8033	37.3639	29.0836	11.7101	40.2636	2.10652	3.78343	2.94498	1.18575	0.202483	0		2.25704
10998	GTTGGTCACACAGTTGGT	GCTCTTCTCACCTCTCCCTTA	TAGAAGACGCACCGGGCTCTTCTCACTTCTCCTTTAGTTAATATTCATAGCTAAGGGAGAGGTGAGAAGAGCTTTTTTGGCAAGCAAAAGACGGCATACGAGATCCACCAACTGTGTGACCAACTTCGCCGTCTTCGT	CLL-H-038472	LOC150786	Homo sapiens RAB6C-like (LOC150786), mRNA.		150786	NM_001077637.1	117938298	NP_001071105.1	2	2q21.1d	24.5921	29.2693	26.9307	3.30723	12.2805	123.745	34.8451	79.295	62.8616	79.2756	4.59494	1.29388	2.94441	2.3342	0.360485	0		2.25635
9247	ACGTTGACACACCAACGT	CCGGCACCATGTGTATAAGAA	TAGAAGACGCACCGGCCGGTACTATGTGTATAAGAAGTTAATATTCATAGCTTCTTATACACATGGTGCCGGTTTTTTGGCAAGCAAAAGACGGCATACGAGATCCACGTTGGTGTGTCAACGTTTCGCCGTCTTCGT	CLL-H-036721	IMP4	Homo sapiens IMP4, U3 small nucleolar ribonucleoprotein, homolog (yeast) (IMP4), mRNA.	MGC19606; BXDC4	92856	NM_033416.1	15529981	NP_219484.1	2	2q21.1b	7.1977	32.9967	20.0972	18.2426	90.7721	80.9421	37.3734	59.1578	30.8077	52.0772	4.02753	1.85963	2.94358	1.53294	0.262829	0		2.25535
19774	CAACACGTTGTGACACTG	CCAGCCAATTTCGCACCATAT	TAGAAGACGCACCGGCCAGCTAATTTCGCACTATATGTTAATATTCATAGCATATGGTGCGAAATTGGCTGGTTTTTTGGCAAGCAAAAGACGGCATACGAGATCCCAGTGTCACAACGTGTTGTTCGCCGTCTTCGT	CLL-H-047248	RNF111	Homo sapiens ring finger protein 111 (RNF111), mRNA.	DKFZp313E0731; FLJ38008; ARK; DKFZp761D081; DKFZp686H1966	54778	NM_017610.6	37595552	NP_060080.6	15	15q22.1b-q22.2a	34.6301	25.1784	29.9043	6.68335	22.3492	92.9747	82.9972	87.9859	7.05519	8.01854	3.10908	2.77543	2.94226	0.235926	0.0137106	0		2.25374
25326	TGGTCACATGCAACTGTG	GCTGCCCTTGAGAAGGATTAT	TAGAAGACGCACCGGGCTGCCTTTGAGAAGGATTGTGTTAATATTCATAGCATAATCCTTCTCAAGGGCAGCTTTTTTGGCAAGCAAAAGACGGCATACGAGATCCCACAGTTGCATGTGACCATTCGCCGTCTTCGT	CLL-H-052800	TUBA1B	Homo sapiens tubulin, alpha 1b (TUBA1B), mRNA.	K-ALPHA-1	10376	NM_006082.2	57013275	NP_006073.2	12	12q13.12b	33.404	52.6514	43.0277	13.61	31.6307	118.55	134.324	126.437	11.1538	8.82163	2.7552	3.1218	2.9385	0.259224	0.0215372	0		2.24918
16336	ACTGTGCATGTGACTGCA	GCATAGCAAACCTCCAATGCA	TAGAAGACGCACCGGGCATAGCAAACCTTCAATGTAGTTAATATTCATAGCTGCATTGGAGGTTTGCTATGCTTTTTTGGCAAGCAAAAGACGGCATACGAGATCCTGCAGTCACATGCACAGTTTCGCCGTCTTCGT	CLL-H-043810	PCP4	Homo sapiens Purkinje cell protein 4 (PCP4), mRNA.	PEP-19	5121	NM_006198.2	48762917	NP_006189.2	21	21q22.2b	28.7996	38.7073	33.7534	7.00577	20.7557	140.175	57.9611	99.068	58.1339	58.6808	4.15291	1.71719	2.93505	1.72231	0.255411	0		2.24499
11693	TGGTACCACAGTTGACAC	GCTTGTCTGTTTCAGAACTTT	TAGAAGACGCACCGGGCTTGTTTGTTTCAGAACTTTGTTAATATTCATAGCAAAGTTCTGAAACAGACAAGCTTTTTTGGCAAGCAAAAGACGGCATACGAGATCCGTGTCAACTGTGGTACCATTCGCCGTCTTCGT	CLL-H-039167	MBD5	Homo sapiens methyl-CpG binding domain protein 5 (MBD5), mRNA.	FLJ11113; MRD1; KIAA1461; FLJ30517	55777	NM_018328.4	38202208	NP_060798.2	2	2q23.1a	21.4696	12.0545	16.762	6.65749	39.7176	57.4085	40.9663	49.1874	11.6264	23.6369	3.42491	2.44399	2.93445	0.693614	0.0757838	0		2.24426
16683	CACATGCAGTACTGTGCA	GAAGGAATCAGAGGACAAGTT	TAGAAGACGCACCGGGAAGGAATCAGAGGATAAGTTGTTAATATTCATAGCAACTTGTCCTCTGATTCCTTCTTTTTTGGCAAGCAAAAGACGGCATACGAGATCCTGCACAGTACTGCATGTGTTCGCCGTCTTCGT	CLL-H-044157	PGAP3	Homo sapiens post-GPI attachment to proteins 3 (PGAP3), mRNA.	CAB2; AGLA546; PP1498; MGC9753; PGAP3	93210	NM_033419.3	45505179	NP_219487.3	17	17q12c	0.0970278	10.1025	5.09977	7.07495	138.731	20.3926	9.49544	14.944	7.70544	51.5621	3.99873	1.86193	2.93033	1.51094	0.314681	0		2.23926
7586	CAACACACCAGTTGTGAC	GCCCTAGATCAACCCTCATTT	TAGAAGACGCACCGGGCCCTAGATTAACCCTTATTTGTTAATATTCATAGCAAATGAGGGTTGATCTAGGGCTTTTTTGGCAAGCAAAAGACGGCATACGAGATCCGTCACAACTGGTGTGTTGTTCGCCGTCTTCGT	CLL-H-035060	GLE1	Homo sapiens GLE1 RNA export mediator homolog (yeast) (GLE1), transcript variant 1, mRNA.	hGLE1	2733	NM_001003722.1	51317383	NP_001003722.1	9	9q34.11b	9.05004	14.7333	11.8917	4.01864	33.7938	35.977	33.6665	34.8217	1.63373	4.69171	3.0254	2.8311	2.92825	0.137385	0.0174291	0		2.23674
9610	GTGTCAACACTGACTGGT	GAGGAGGAAATCACCATCAAT	TAGAAGACGCACCGGGAGGAGGAAATCACCATTAATGTTAATATTCATAGCATTGATGGTGATTTCCTCCTCTTTTTTGGCAAGCAAAAGACGGCATACGAGATCCACCAGTCAGTGTTGACACTTCGCCGTCTTCGT	CLL-H-037084	JMJD5	Homo sapiens jumonji domain containing 5 (JMJD5), mRNA.	FLJ13798	79831	NM_001145348.1	13376122	NP_079049.1	16	16p12.1a	8.00038	12.7813	10.3908	3.38061	32.5346	26.9646	33.8851	30.4249	4.89355	16.0841	2.59504	3.26106	2.92805	0.470949	0.0413547	0		2.23649
11698	CACAGTACACGTTGTGCA	GGTCTGGAGTGTCCACTTAAT	TAGAAGACGCACCGGGGTCTGGAGTGTTCATTTAATGTTAATATTCATAGCATTAAGTGGACACTCCAGACCTTTTTTGGCAAGCAAAAGACGGCATACGAGATCCTGCACAACGTGTACTGTGTTCGCCGTCTTCGT	CLL-H-039172	MBD6	Homo sapiens methyl-CpG binding domain protein 6 (MBD6), mRNA.	KIAA1887	114785	NM_052897.3	46852160	NP_443129.3	12	12q13.3b	30.061	28.6255	29.3432	1.01502	3.45911	46.7048	125.019	85.8617	55.3762	64.4946	1.59167	4.26056	2.92611	1.88719	0.285771	0		2.23415
8715	TGGTCACAGTTGTGTGAC	AGTACTGAGTCTGGGTATTTC	TAGAAGACGCACCGGAGTACTGAGTTTGGGTATTTCGTTAATATTCATAGCGAAATACCCAGACTCAGTACTTTTTTTGGCAAGCAAAAGACGGCATACGAGATCCGTCACACAACTGTGACCATTCGCCGTCTTCGT	CLL-H-036189	HIVEP3	Homo sapiens human immunodeficiency virus type I enhancer binding protein 3 (HIVEP3), mRNA.	KIAA1555; KRC; ZAS3; KBP1; KBP-1	59269	NM_001127714.1	13375633	NP_078779.1	1	1p34.2c-p34.2b	17.9325	29.6846	23.8085	8.30997	34.9033	42.0416	97.0835	69.5625	38.9205	55.9504	1.76582	4.07768	2.92175	1.63473	0.24549	0		2.22885
12841	ACACCACAACGTTGTGCA	AGCATTGAATGGGTGTCTATT	TAGAAGACGCACCGGAGCATTGAATGGGTGTTTATTGTTAATATTCATAGCAATAGACACCCATTCAATGCTTTTTTTGGCAAGCAAAAGACGGCATACGAGATCCTGCACAACGTTGTGGTGTTTCGCCGTCTTCGT	CLL-H-040315	MYH15	PREDICTED: Homo sapiens myosin, heavy polypeptide 15 (MYH15), mRNA.		22989	NM_014981.1	88970859	XP_943318.1		3q13.13a	40.2136	31.6988	35.9562	6.02084	16.7449	79.5528	130.493	105.023	36.0204	34.2976	2.21249	3.62923	2.92086	1.00179	0.115976	0		2.22777
22710	GTCATGACTGCACAACGT	CGGGAGAGTTTCCTTAAGGAT	TAGAAGACGCACCGGCGGGAGAGTTTCTTTAAGGGTGTTAATATTCATAGCATCCTTAAGGAAACTCTCCCGTTTTTTGGCAAGCAAAAGACGGCATACGAGATCCACGTTGTGCAGTCATGACTTCGCCGTCTTCGT	CLL-H-050184	SPTBN5	Homo sapiens spectrin, beta, non-erythrocytic 5 (SPTBN5), mRNA.	HUSPECV; HUBSPECV; BSPECV	51332	NM_016642.2	126090465	NP_057726.3	15	15q15.1c	14.5894	32.3945	23.492	12.5901	53.5931	77.5474	59.6435	68.5954	12.6599	18.456	3.30102	2.53889	2.91995	0.538905	0.0702009	0		2.22667
25130	ACGTGTCATGTGACTGCA	CCATGTTAGATGGACAGAAAT	TAGAAGACGCACCGGCCATGTTAGATGGATAGAAATGTTAATATTCATAGCATTTCTGTCCATCTAACATGGTTTTTTGGCAAGCAAAAGACGGCATACGAGATCCTGCAGTCACATGACACGTTTCGCCGTCTTCGT	CLL-H-052604	TSGA14	Homo sapiens testis specific, 14 (TSGA14), mRNA.	Cep41; DKFZp762H1311	95681	NM_018718.1	16306478	NP_061188.1	7	7q32.2b	23.0661	12.0856	17.5759	7.76439	44.1764	52.5157	50.1101	51.3129	1.70106	3.31508	2.98794	2.85107	2.9195	0.0967839	0.02665	0		2.22612
25500	CAACCATGCAACCAACTG	GACCTTCTCTATCAAGACATT	TAGAAGACGCACCGGGACCTTCTCTATCAAGATATTGTTAATATTCATAGCAATGTCTTGATAGAGAAGGTCTTTTTTGGCAAGCAAAAGACGGCATACGAGATCCCAGTTGGTTGCATGGTTGTTCGCCGTCTTCGT	CLL-H-052974	TXNL4B	Homo sapiens thioredoxin-like 4B (TXNL4B), mRNA.	DLP; Dim2; FLJ20511	54957	NM_001142317.1	8923474	NP_060323.1	16	16q22.3a	40.3371	43.0992	41.7181	1.95311	4.68169	100.851	142.698	121.775	29.5898	24.2988	2.41745	3.42052	2.91898	0.709278	0.0622651	0		2.22549
25316	CAGTTGACTGACTGTGGT	GCTCAGACATCCTGAGCTATT	TAGAAGACGCACCGGGCTCAGACATTCTGAGTTATTGTTAATATTCATAGCAATAGCTCAGGATGTCTGAGCTTTTTTGGCAAGCAAAAGACGGCATACGAGATCCACCACAGTCAGTCAACTGTTCGCCGTCTTCGT	CLL-H-052790	TTYH1	Homo sapiens tweety homolog 1 (Drosophila) (TTYH1), transcript variant 2, mRNA.		57348	NM_001005367.1	53831988	NP_001005367.1	19	19q13.42a	11.3522	33.059	22.2056	15.349	69.1221	123.781	5.71247	64.7468	83.4871	128.944	5.57431	0.257253	2.91578	3.75973	0.551961	0		2.22161
21222	GTTGGTCACAGTTGACCA	TCTTGCTGCATGTGGTTGATT	TAGAAGACGCACCGGTCTTGCTGTATGTGGTTGATTGTTAATATTCATAGCAATCAACCACATGCAGCAAGATTTTTTGGCAAGCAAAAGACGGCATACGAGATCCTGGTCAACTGTGACCAACTTCGCCGTCTTCGT	CLL-H-048696	SIRT3	Homo sapiens sirtuin (silent mating type information regulation 2 homolog) 3 (S. cerevisiae) (SIRT3), transcript variant 1, mRNA.	SIR2L3	23410	NM_001017524.2	63054856	NP_036371.1	11	11p15.5d	27.9352	28.2725	28.1038	0.238524	0.848725	122.96	40.9188	81.9392	58.0116	70.7984	4.37519	1.45599	2.91559	2.06419	0.319773	0		2.22137
25908	GTGTTGCACATGTGTGCA	GCCACTTTCAAGCACAATATA	TAGAAGACGCACCGGGCCACTTTCAAGCATAATATAGTTAATATTCATAGCTATATTGTGCTTGAAAGTGGCTTTTTTGGCAAGCAAAAGACGGCATACGAGATCCTGCACACATGTGCAACACTTCGCCGTCTTCGT	CLL-H-053382	USP43	Homo sapiens ubiquitin specific peptidase 43 (USP43), mRNA.	FLJ30626	124739	NM_153210.3	123703801	NP_694942.2		17p13.1b	16.2389	9.85332	13.0461	4.5153	34.6103	9.66473	66.373	38.0189	40.0988	105.471	0.740812	5.08757	2.91419	3.07362	0.473755	0		2.21967
16171	ACCAGTACACACTGACAC	CCGGAGTCTTTGATCTACAAA	TAGAAGACGCACCGGCCGGAGTCTTTGATCTATAAAGTTAATATTCATAGCTTTGTAGATCAAAGACTCCGGTTTTTTGGCAAGCAAAAGACGGCATACGAGATCCGTGTCAGTGTGTACTGGTTTCGCCGTCTTCGT	CLL-H-043645	PBRM1	Homo sapiens polybromo 1 (PBRM1), transcript variant 4, mRNA.	MGC156156; BAF180; MGC156155; PB1	55193	NM_018165.4	93102368	NP_851385.1	3	3p21.1d	60.4218	22.3439	41.3829	26.9252	65.0636	203.527	37.6301	120.579	117.307	97.2867	4.91815	0.909315	2.91373	2.83467	0.450319	0		2.21912
26034	TGTGACACGTCAACACAC	GTGGGTCATACGAATACCGAT	TAGAAGACGCACCGGGTGGGTCATATGAATACTGATGTTAATATTCATAGCATCGGTATTCGTATGACCCACTTTTTTGGCAAGCAAAAGACGGCATACGAGATCCGTGTGTTGACGTGTCACATTCGCCGTCTTCGT	CLL-H-053508	VIPR2	Homo sapiens vasoactive intestinal peptide receptor 2 (VIPR2), mRNA.	VPAC2; FLJ16511; VPCAP2R	7434	NM_003382.4	33188464	NP_003373.2	7	7q36.3e	22.5281	27.4003	24.9642	3.44521	13.8006	109.936	35.4344	72.6854	52.6808	72.4778	4.40376	1.41941	2.91158	2.11025	0.329428	0		2.21651
9028	ACGTTGCACACACAACTG	GCAAAGAGACATCATGGGTAT	TAGAAGACGCACCGGGCAAAGAGACATTATGGGTATGTTAATATTCATAGCATACCCATGATGTCTCTTTGCTTTTTTGGCAAGCAAAAGACGGCATACGAGATCCCAGTTGTGTGTGCAACGTTTCGCCGTCTTCGT	CLL-H-036502	HTN3	Homo sapiens histatin 3 (HTN3), mRNA.	HTN2; HTN5; HIS2	3347	NM_000200.2	4557652	NP_000191.1	4	4q13.3a	16.9887	14.8994	15.944	1.47735	9.26586	31.0963	61.6871	46.3917	21.631	46.6268	1.95034	3.86898	2.90966	1.35668	0.18542	0		2.21417
20509	GTACACGTACACGTACGT	GCCAGAGCATACAGAGTGTAT	TAGAAGACGCACCGGGCCAGAGTATATAGAGTGTATGTTAATATTCATAGCATACACTCTGTATGCTCTGGCTTTTTTGGCAAGCAAAAGACGGCATACGAGATCCACGTACGTGTACGTGTACTTCGCCGTCTTCGT	CLL-H-047983	SCO1	Homo sapiens SCO cytochrome oxidase deficient homolog 1 (yeast) (SCO1), nuclear gene encoding mitochondrial protein, mRNA.	SCOD1	6341	NM_004589.2	4759067	NP_004580.1	17	17p13.1a	1.28782	8.60738	4.9476	5.17571	104.61	15.2824	13.5065	14.3944	1.2557	8.72352	3.08884	2.72991	2.90938	0.2538	0.128898	0		2.21383
22146	TGGTTGGTACACCACAGT	GAGGAGTTCCTGGTCCTTTCA	TAGAAGACGCACCGGGAGGAGTTTCTGGTTCTTTCAGTTAATATTCATAGCTGAAAGGACCAGGAACTCCTCTTTTTTGGCAAGCAAAAGACGGCATACGAGATCCACTGTGGTGTACCAACCATTCGCCGTCTTCGT	CLL-H-049620	SLCO1B1	Homo sapiens solute carrier organic anion transporter family, member 1B1 (SLCO1B1), mRNA.	LST-1; OATP2; OATP1B1; SLC21A6; MGC133282; OATP-C	10599	NM_006446.4	141801825	NP_006437.2	12	12p12.2a-p12.1e	5.73346	2.82414	4.2788	2.0572	48.079	18.7617	6.13069	12.4462	8.93144	71.7606	4.3848	1.43281	2.9088	2.08737	0.334707	0		2.21313
11371	ACCATGGTTGACCAACTG	CGTCGTGCTAAACCTAGTAAT	TAGAAGACGCACCGGCGTCGTGCTAAACTTAGTAATGTTAATATTCATAGCATTACTAGGTTTAGCACGACGTTTTTTGGCAAGCAAAAGACGGCATACGAGATCCCAGTTGGTCAACCATGGTTTCGCCGTCTTCGT	CLL-H-038845	M160	Homo sapiens scavenger receptor cysteine-rich type 1 protein M160 (M160), mRNA.	CD163B	283316	NM_174941.4	50659090	NP_777601.2	12	12p13.31c	35.618	51.6651	43.6415	11.347	26.0004	13.5185	240.237	126.878	160.314	126.353	0.309763	5.50479	2.90728	3.67344	0.540108	0		2.21128
3164	TGCACAGTACACCAACCA	GCAGCAGAAGCATTTCTAGTT	TAGAAGACGCACCGGGCAGCAGAAGTATTTCTAGTTGTTAATATTCATAGCAACTAGAAATGCTTCTGCTGCTTTTTTGGCAAGCAAAAGACGGCATACGAGATCCTGGTTGGTGTACTGTGCATTCGCCGTCTTCGT	CLL-H-030638	CENPA	Homo sapiens centromere protein A (CENPA), transcript variant 2, mRNA.	CENP-A	1058	NM_001042426.1	109637778	NP_001035891.1	2	2p23.3a	17.2092	10.3621	13.7856	4.84164	35.1209	48.5774	31.5184	40.0479	12.0625	30.1202	3.52376	2.28632	2.90504	0.875005	0.103762	0		2.20857
12168	CACATGCAGTTGACACGT	TCTGTCAGATACAGCCACCTA	TAGAAGACGCACCGGTCTGTCAGATATAGCCACTTAGTTAATATTCATAGCTAGGTGGCTGTATCTGACAGATTTTTTGGCAAGCAAAAGACGGCATACGAGATCCACGTGTCAACTGCATGTGTTCGCCGTCTTCGT	CLL-H-039642	MLLT11	Homo sapiens myeloid/lymphoid or mixed-lineage leukemia (trithorax homolog, Drosophila); translocated to, 11 (MLLT11), mRNA.	AF1Q; RP11-316M1.10	10962	NM_006818.3	55774979	NP_006809.1	1	1q21.2d	8.9442	0.103828	4.52401	6.25108	138.176	22.1685	4.10614	13.1373	12.772	97.2194	4.90018	0.907631	2.90391	2.82316	0.481906	0		2.20719
20137	GTGTACGTCACAACTGGT	CAGATGAGACATACCGCATAT	TAGAAGACGCACCGGCAGATGAGACATACCGTATATGTTAATATTCATAGCATATGCGGTATGTCTCATCTGTTTTTTGGCAAGCAAAAGACGGCATACGAGATCCACCAGTTGTGACGTACACTTCGCCGTCTTCGT	CLL-H-047611	RSHL3	Homo sapiens radial spokehead-like 3 (RSHL3), mRNA.	MGC126303; FLJ37974; dJ412I7.1	345895	NM_001010892.2	58219005	NP_001010892.1	6	6q22.1d	39.1022	38.4477	38.7749	0.462799	1.19355	179.619	45.5667	112.593	94.7893	84.1877	4.63235	1.17516	2.90375	2.4446	0.385582	0		2.20701
8914	CACAGTACCAGTCAACAC	GCTGGGATACAGCTATTCTTA	TAGAAGACGCACCGGGCTGGGATACAGTTATTCTTAGTTAATATTCATAGCTAAGAATAGCTGTATCCCAGCTTTTTTGGCAAGCAAAAGACGGCATACGAGATCCGTGTTGACTGGTACTGTGTTCGCCGTCTTCGT	CLL-H-036388	HPS5	Homo sapiens Hermansky-Pudlak syndrome 5 (HPS5), transcript variant 1, mRNA.	KIAA1017; AIBP63	11234	NM_007216.3	31657122	NP_852608.1	11	11p15.1d-p15.1c	0.0705656	21.0876	10.5791	14.8613	140.478	23.1229	38.1814	30.6521	10.648	34.7381	2.18572	3.60914	2.89743	1.00651	0.260682	0		2.19933
20759	TGCATGACTGTGACACTG	CTAGGTGTGCAGGATCTCTTT	TAGAAGACGCACCGGCTAGGTGTGTAGGATTTCTTTGTTAATATTCATAGCAAAGAGATCCTGCACACCTAGTTTTTTGGCAAGCAAAAGACGGCATACGAGATCCCAGTGTCACAGTCATGCATTCGCCGTCTTCGT	CLL-H-048233	SERPINB1	Homo sapiens serpin peptidase inhibitor, clade B (ovalbumin), member 1 (SERPINB1), mRNA.	EI; MNEI; ELANH2; M/NEI; LEI; PI2	1992	NM_030666.2	20149554	NP_109591.1	6	6p25.2b	22.0253	14.2245	18.1249	5.516	30.4333	27.6653	77.3607	52.513	35.14	66.9167	1.52637	4.2682	2.89728	1.93877	0.304941	0		2.19916
10348	ACTGACTGACCAACTGGT	GCCTTGAGCAAAGAGAAACAT	TAGAAGACGCACCGGGCCTTGAGCAAAGAGAAATATGTTAATATTCATAGCATGTTTCTCTTTGCTCAAGGCTTTTTTGGCAAGCAAAAGACGGCATACGAGATCCACCAGTTGGTCAGTCAGTTTCGCCGTCTTCGT	CLL-H-037822	KLHL34	Homo sapiens kelch-like 34 (Drosophila) (KLHL34), mRNA.	FLJ34960; RP11-450P7.3; MGC125650	257240	NM_153270.1	23397571	NP_695002.1	X	Xp22.12a	54.7942	56.0985	55.4464	0.922288	1.66339	22.5067	298.712	160.609	195.307	121.603	0.405919	5.3874	2.89666	3.52244	0.525912	0		2.1984
16678	GTACTGACGTGTACTGGT	CCTTGTTTCATGGCAGTGAAA	TAGAAGACGCACCGGCCTTGTTTCATGGTAGTGAAAGTTAATATTCATAGCTTTCACTGCCATGAAACAAGGTTTTTTGGCAAGCAAAAGACGGCATACGAGATCCACCAGTACACGTCAGTACTTCGCCGTCTTCGT	CLL-H-044152	PGAM4	Homo sapiens phosphoglycerate mutase family member 4 (PGAM4), mRNA.	dJ1000K24.1; PGAM-B; PGAM3	441531	NM_001029891.2	84370365	NP_001025062.1	X	Xq21.1a	49.4489	46.0895	47.7692	2.37546	4.97279	238.175	38.476	138.326	141.209	102.084	4.98596	0.805457	2.89571	2.95606	0.460227	0		2.19724
11115	GTGTCATGACACGTACCA	CTGCACAATTTCACCGTATTA	TAGAAGACGCACCGGCTGCACAATTTCACTGTATTAGTTAATATTCATAGCTAATACGGTGAAATTGTGCAGTTTTTTGGCAAGCAAAAGACGGCATACGAGATCCTGGTACGTGTCATGACACTTCGCCGTCTTCGT	CLL-H-038589	LOX	Homo sapiens lysyl oxidase (LOX), mRNA.	MGC105112	4015	NM_002317.4	21264603	NP_002308.2	5	5q23.1e	4.84257	4.69305	4.76781	0.105726	2.2175	18.3871	9.21979	13.8035	6.4823	46.9614	3.85652	1.93376	2.89514	1.3596	0.187507	0		2.19655
26313	CAGTGTGTCAACTGTGCA	CCGAGAAGTCATGGACCTAAT	TAGAAGACGCACCGGCCGAGAAGTTATGGACTTAATGTTAATATTCATAGCATTAGGTCCATGACTTCTCGGTTTTTTGGCAAGCAAAAGACGGCATACGAGATCCTGCACAGTTGACACACTGTTCGCCGTCTTCGT	CLL-H-053787	XPO5	Homo sapiens exportin 5 (XPO5), mRNA.	FLJ45606; FLJ14239; FLJ32057; KIAA1291	57510	NM_020750.2	22748936	NP_065801.1	6	6p21.1c	0.0352828	5.92861	2.98195	4.16721	139.748	5.81092	11.444	8.62744	3.98316	46.1685	1.9487	3.83775	2.89322	1.33576	0.300316	0		2.19423
18253	TGGTACTGCATGCAACGT	GCAGCTACAGAAGTCAAGATT	TAGAAGACGCACCGGGCAGCTACAGAAGTTAAGATTGTTAATATTCATAGCAATCTTGACTTCTGTAGCTGCTTTTTTGGCAAGCAAAAGACGGCATACGAGATCCACGTTGCATGCAGTACCATTCGCCGTCTTCGT	CLL-H-045727	PSIP1	Homo sapiens PC4 and SFRS1 interacting protein 1 (PSIP1), transcript variant 1, mRNA.	MGC74712; PAIP; LEDGF; p75; PSIP2; p52; DFS70	11168	NM_001128217.1	16945969	NP_066967.2	9	9p22.3b	7.33883	16.4361	11.8874	6.43271	54.1135	29.5016	39.2459	34.3737	6.89028	20.0452	2.48174	3.30146	2.8916	0.579627	0.0777557	0		2.19226
11363	CACAACACACCATGTGGT	CCACTCGAACAAGGCAGACAA	TAGAAGACGCACCGGCCACTCGAATAAGGCAGATAAGTTAATATTCATAGCTTGTCTGCCTTGTTCGAGTGGTTTTTTGGCAAGCAAAAGACGGCATACGAGATCCACCACATGGTGTGTTGTGTTCGCCGTCTTCGT	CLL-H-038837	LZTS1	Homo sapiens leucine zipper, putative tumor suppressor 1 (LZTS1), mRNA.	FEZ1; F37	11178	NM_021020.2	10440565	NP_066300.1	8	8p21.3c	4.4721	11.6496	8.06083	5.07523	62.9617	0.39867	46.1655	23.2821	32.362	139	0.0494577	5.72714	2.8883	4.01473	0.578607	0		2.18825
1680	ACTGGTCACATGTGACCA	CCTTCTATGACTGGCCGCTGA	TAGAAGACGCACCGGCCTTCTATGATTGGCCGTTGAGTTAATATTCATAGCTCAGCGGCCAGTCATAGAAGGTTTTTTGGCAAGCAAAAGACGGCATACGAGATCCTGGTCACATGTGACCAGTTTCGCCGTCTTCGT	CLL-H-029154	BIRC7	Homo sapiens baculoviral IAP repeat-containing 7 (BIRC7), transcript variant 2, mRNA.	LIVIN; ML-IAP; MLIAP; RNF50; KIAP	79444	NM_022161.2	21536419	NP_071444.1	20	20q13.33d	13.7427	5.64827	9.69547	5.7236	59.0338	31.3016	24.6938	27.9977	4.67242	16.6886	3.22848	2.54695	2.88772	0.481918	0.0727102	0		2.18754
9669	TGTGGTACCACATGACAC	GAGTCCCATTTCTCTAGCATT	TAGAAGACGCACCGGGAGTCCCATTTCTCTAGTATTGTTAATATTCATAGCAATGCTAGAGAAATGGGACTCTTTTTTGGCAAGCAAAAGACGGCATACGAGATCCGTGTCATGTGGTACCACATTCGCCGTCTTCGT	CLL-H-037143	KCNA10	Homo sapiens potassium voltage-gated channel, shaker-related subfamily, member 10 (KCNA10), mRNA.	Kv1.8; Kcn1	3744	NM_005549.2	27436997	NP_005540.1	1	1p13.3a	9.18235	14.9513	12.0668	4.07926	33.8056	28.064	41.6031	34.8335	9.57364	27.484	2.32571	3.44773	2.88672	0.793385	0.0905081	0		2.18633
23316	GTGTGTGTACGTACTGTG	CATGACTTCTTTGTGGGACTT	TAGAAGACGCACCGGCATGACTTCTTTGTGGGATTTGTTAATATTCATAGCAAGTCCCACAAAGAAGTCATGTTTTTTGGCAAGCAAAAGACGGCATACGAGATCCCACAGTACGTACACACACTTCGCCGTCTTCGT	CLL-H-050790	TAC3	Homo sapiens tachykinin 3 (neuromedin K, neurokinin beta) (TAC3), transcript variant 1, mRNA.	PRO1155; NKB; ZNEUROK1; NKNB	6866	NM_013251.2	55742886	NP_001006668.1	12	12q13.3a	23.9041	19.1564	21.5302	3.35717	15.5928	14.0984	110.2	62.1494	67.9543	109.34	0.65482	5.1184	2.88661	3.15623	0.487391	0		2.1862
1297	CATGCACACACACAACAC	GCTGGATTTAATCTGTATCAT	TAGAAGACGCACCGGGCTGGATTTAATCTGTATCATGTTAATATTCATAGCATGATACAGATTAAATCCAGCTTTTTTGGCAAGCAAAAGACGGCATACGAGATCCGTGTTGTGTGTGTGCATGTTCGCCGTCTTCGT	CLL-H-028771	ATL1	Homo sapiens atlastin GTPase 1 (ATL1), transcript variant 2, mRNA.		51062	NM_001127713.1	189181740	NP_853629.2	14	14q22.1b	42.3394	34.4295	38.3845	5.59311	14.5713	47.1397	174.454	110.797	90.0246	81.252	1.22809	4.54491	2.8865	2.34534	0.373968	0		2.18607
403	GTTGACACTGTGTGACTG	CGGAAGAATTCCGCCTGAATT	TAGAAGACGCACCGGCGGAAGAATTTCGCTTGAATTGTTAATATTCATAGCAATTCAGGCGGAATTCTTCCGTTTTTTGGCAAGCAAAAGACGGCATACGAGATCCCAGTCACACAGTGTCAACTTCGCCGTCTTCGT	CLL-H-027877	ADCK1	Homo sapiens aarF domain containing kinase 1 (ADCK1), mRNA.	FLJ39600	57143	NM_001142545.1	40254937	NP_065154.2	14	14q24.3d	43.195	51.8831	47.539	6.14342	12.9229	117.523	156.622	137.073	27.6474	20.1699	2.47214	3.29461	2.88337	0.581572	0.046564	0		2.18227
6195	CAACGTCAACCAGTCATG	CAGAGCTACGCACTCCTTTCC	TAGAAGACGCACCGGCAGAGCTACGCACTTCTTTCTGTTAATATTCATAGCGGAAAGGAGTGCGTAGCTCTGTTTTTTGGCAAGCAAAAGACGGCATACGAGATCCCATGACTGGTTGACGTTGTTCGCCGTCTTCGT	CLL-H-033669	FAM108A1	Homo sapiens family with sequence similarity 108, member A1 (FAM108A1), mRNA.	C19orf27; MGC5244	81926	NM_001130111.1	21361948	NP_112490.2	19	19p13.3h	9.65867	9.80141	9.73004	0.10093	1.03731	25.9377	30.1117	28.0247	2.95142	10.5315	2.66574	3.09471	2.88022	0.303331	0.0127792	0		2.17845
9131	CATGACCATGTGACTGGT	GCCTTATGAGATCATCCTCAT	TAGAAGACGCACCGGGCCTTATGAGATCATCTTCATGTTAATATTCATAGCATGAGGATGATCTCATAAGGCTTTTTTGGCAAGCAAAAGACGGCATACGAGATCCACCAGTCACATGGTCATGTTCGCCGTCTTCGT	CLL-H-036605	IFT88	Homo sapiens intraflagellar transport 88 homolog (Chlamydomonas) (IFT88), transcript variant 2, mRNA.	TTC10; hTg737; MGC26259; TG737; D13S1056E; RP11-172H24.2	8100	NM_006531.3	82546850	NP_006522.2	13	13q12.11b	6.01572	10.3621	8.1889	3.07334	37.5306	22.4463	24.7129	23.5796	1.60267	6.79685	2.74107	3.01785	2.87946	0.195712	0.0244339	0		2.17752
23931	CAACACTGGTGTACTGTG	GAGGATGACGGACAAGTGTTT	TAGAAGACGCACCGGGAGGATGATGGATAAGTGTTTGTTAATATTCATAGCAAACACTTGTCCGTCATCCTCTTTTTTGGCAAGCAAAAGACGGCATACGAGATCCCACAGTACACCAGTGTTGTTCGCCGTCTTCGT	CLL-H-051405	TIMM13	Homo sapiens translocase of inner mitochondrial membrane 13 homolog (yeast) (TIMM13), nuclear gene encoding mitochondrial protein, mRNA.	ppv1; TIMM13B; TIM13B; TIM13; TIMM13A	26517	NM_012458.2	27436898	NP_036590.1	19	19p13.3g	4.24276	6.94613	5.59444	1.91157	34.1691	5.77468	26.4332	16.104	14.6078	90.7095	1.03222	4.72491	2.87856	2.61113	0.419259	0		2.17643
13141	CAACGTTGGTCATGTGCA	GAGGCAGATGAATGGTTTCTG	TAGAAGACGCACCGGGAGGTAGATGAGTGGTTTCTGGTTAATATTCATAGCCAGAAACCATTCATCTGCCTCTTTTTTGGCAAGCAAAAGACGGCATACGAGATCCTGCACATGACCAACGTTGTTCGCCGTCTTCGT	CLL-H-040615	NDN	Homo sapiens necdin homolog (mouse) (NDN), mRNA.	HsT16328	4692	NM_002487.2	10800414	NP_002478.1	15	15q11.2d	9.04122	17.9104	13.4758	6.27147	46.5387	20.9	56.6209	38.7605	25.2585	65.1657	1.55092	4.20167	2.8763	1.87436	0.303175	0		2.17368
18197	TGGTACGTGTACGTTGAC	GAGGTGATGAGCAAGTGTACA	TAGAAGACGCACCGGGAGGTGATGAGTAAGTGTATAGTTAATATTCATAGCTGTACACTTGCTCATCACCTCTTTTTTGGCAAGCAAAAGACGGCATACGAGATCCGTCAACGTACACGTACCATTCGCCGTCTTCGT	CLL-H-045671	PRSS38	Homo sapiens protease, serine, 38 (PRSS38), mRNA.	MGC163272	339501	NM_183062.2	38176298	NP_898885.1	1	1q42.13b	11.855	11.2446	11.5498	0.43162	3.73702	30.2748	36.1473	33.211	4.15251	12.5034	2.62123	3.12968	2.87546	0.35953	0.0180715	0		2.17266
22424	CAGTACTGCAACTGTGCA	CCACAAGGATTTGGGAATCTT	TAGAAGACGCACCGGCCACAAGGGTTTGGGAGTCTTGTTAATATTCATAGCAAGATTCCCAAATCCTTGTGGTTTTTTGGCAAGCAAAAGACGGCATACGAGATCCTGCACAGTTGCAGTACTGTTCGCCGTCTTCGT	CLL-H-049898	SPA17	Homo sapiens sperm autoantigenic protein 17 (SPA17), mRNA.	SP17; SP17-1	53340	NM_017425.3	15718773	NP_059121.1	11	11q24.2a	3.99578	11.0474	7.52157	4.98621	66.2922	11.3198	31.8986	21.6092	14.5514	67.3389	1.50498	4.24095	2.87297	1.93462	0.324601	0		2.16964
17988	GTACACGTGTGTTGACAC	CCGAAGAAGCTCTGCTCCAAA	TAGAAGACGCACCGGCCGAAGAAGCTTTGCTCTAAAGTTAATATTCATAGCTTTGGAGCAGAGCTTCTTCGGTTTTTTGGCAAGCAAAAGACGGCATACGAGATCCGTGTCAACACACGTGTACTTCGCCGTCTTCGT	CLL-H-045462	PRKCDBP	Homo sapiens protein kinase C, delta binding protein (PRKCDBP), mRNA.	HSRBC; MGC20400; SRBC	112464	NM_145040.2	47132586	NP_659477.2	11	11p15.4c	15.6038	13.9442	14.774	1.17356	7.9434	39.6496	45.234	42.4418	3.94882	9.30407	2.68374	3.06173	2.87274	0.267281	0.0109035	0		2.16936
22546	ACGTGTTGGTACCAACCA	CCCTACCTTTGAAGGGATCAA	TAGAAGACGCACCGGCCCTATCTTTGAAGGGATTAAGTTAATATTCATAGCTTGATCCCTTCAAAGGTAGGGTTTTTTGGCAAGCAAAAGACGGCATACGAGATCCTGGTTGGTACCAACACGTTTCGCCGTCTTCGT	CLL-H-050020	SPG7	Homo sapiens spastic paraplegia 7 (pure and complicated autosomal recessive) (SPG7), nuclear gene encoding mitochondrial protein, transcript variant 2, mRNA.	CAR; FLJ37308; SPG5C; MGC126332; CMAR; MGC126331; PGN	6687	NM_003119.2	40806172	NP_955399.1	16	16q24.3b	6.16567	8.58662	7.37615	1.71187	23.2081	12.7816	29.5794	21.1805	11.8778	56.0791	1.73283	4.01014	2.87149	1.6103	0.245307	0		2.16784
25	CAGTCAGTGTCAGTCAAC	CGTGACTGCGTTGTGTGAACA	TAGAAGACGCACCGGCGTGACTGTGTTGTGTGAATAGTTAATATTCATAGCTGTTCACACAACGCAGTCACGTTTTTTGGCAAGCAAAAGACGGCATACGAGATCCGTTGACTGACACTGACTGTTCGCCGTCTTCGT	CLL-H-027499	A2BP1	Homo sapiens ataxin 2-binding protein 1 (A2BP1), transcript variant 4, mRNA.	FOX1; HRNBP1	54715	NM_001142333.1	22538402	NP_061193.2	16	16p13.3a-p13.2c	17.315	12.5113	14.9132	3.39674	22.7767	76.4722	9.17227	42.8222	47.5882	111.13	5.12782	0.615044	2.87143	3.19102	0.495068	0		2.16778
24241	GTTGACCATGGTTGTGCA	GAACAACCAGGAAGCTATATG	TAGAAGACGCACCGGGAACAACCAGGAAGTTATATGGTTAATATTCATAGCCATATAGCTTCCTGGTTGTTCTTTTTTGGCAAGCAAAAGACGGCATACGAGATCCTGCACAACCATGGTCAACTTCGCCGTCTTCGT	CLL-H-051715	TMPO	Homo sapiens thymopoietin (TMPO), transcript variant 1, mRNA.	MGC61508; PRO0868; CMD1T; TP; LAP2	7112	NM_001032283.1	4507554	NP_003267.1	12	12q23.1c	15.251	39.4964	27.3737	17.1441	62.6297	16.5629	140.531	78.5468	87.6584	111.6	0.605068	5.13378	2.86943	3.20229	0.502883	0		2.16534
20517	TGGTACGTACACGTACGT	CTTCACTCACTGCCCTGACAT	TAGAAGACGCACCGGCTTCACTCACTGTCCTGATATGTTAATATTCATAGCATGTCAGGGCAGTGAGTGAAGTTTTTTGGCAAGCAAAAGACGGCATACGAGATCCACGTACGTGTACGTACCATTCGCCGTCTTCGT	CLL-H-047991	SCO2	Homo sapiens SCO cytochrome oxidase deficient homolog 2 (yeast) (SCO2), nuclear gene encoding mitochondrial protein, mRNA.	MGC125823; MGC125825; SCO1L	9997	NM_001169109.1	4826991	NP_005129.1	22	22q13.33b	9.55282	17.4951	13.524	5.61604	41.5266	40.5798	37.0027	38.7913	2.52935	6.52041	3.00058	2.73609	2.86834	0.187027	0.0284495	0		2.16402
16765	ACCATGACGTCATGTGGT	GCCAAGTGCCTATGCAAACCA	TAGAAGACGCACCGGGCCAAGTGCTTATGCAAATCAGTTAATATTCATAGCTGGTTTGCATAGGCACTTGGCTTTTTTGGCAAGCAAAAGACGGCATACGAGATCCACCACATGACGTCATGGTTTCGCCGTCTTCGT	CLL-H-044239	PHB	Homo sapiens prohibitin (PHB), mRNA.	PHB1	5245	NM_002634.2	6031190	NP_002625.1	17	17q21.33a	4.81611	21.2225	13.0193	11.6011	89.1068	22.6759	52.011	37.3435	20.7431	55.5468	1.74171	3.99491	2.86831	1.59325	0.284747	0		2.16399
26431	GTACCAGTTGACTGACTG	GCCGAAGATTATGAAATGAAA	TAGAAGACGCACCGGGCCGAAGATTATGAAATGAAAGTTAATATTCATAGCTTTCATTTCATAATCTTCGGCTTTTTTGGCAAGCAAAAGACGGCATACGAGATCCCAGTCAGTCAACTGGTACTTCGCCGTCTTCGT	CLL-H-053905	ZBTB33	Homo sapiens zinc finger and BTB domain containing 33 (ZBTB33), mRNA.	ZNF348; ZNF-kaiso	10009	NM_006777.3	41152068	NP_006768.1	X	Xq24d	0.264621	21.0149	10.6398	14.6727	137.904	36.0253	25.0075	30.5164	7.79074	25.5297	3.38591	2.35038	2.86815	0.73223	0.232707	0		2.16379
22921	TGCAGTCAGTACGTACTG	CAGCAGAAGTTGCCAGGATTA	TAGAAGACGCACCGGCAGCAGAAGTTGCTAGGATTGGTTAATATTCATAGCTAATCCTGGCAACTTCTGCTGTTTTTTGGCAAGCAAAAGACGGCATACGAGATCCCAGTACGTACTGACTGCATTCGCCGTCTTCGT	CLL-H-050395	STARD13	Homo sapiens StAR-related lipid transfer (START) domain containing 13 (STARD13), transcript variant gamma, mRNA.	FLJ37385; DLC2; GT650	90627	NM_052851.2	16445030	NP_443083.1	13	13q13.1b	27.9352	14.3491	21.1421	9.60681	45.4392	56.7924	64.472	60.6322	5.43034	8.9562	2.68622	3.04946	2.86784	0.256849	0.0368977	0		2.16342
21194	CATGTGACGTGTTGACGT	CCCTCACATAATCAAACTTTA	TAGAAGACGCACCGGCCCTCACATAATCAAACTTTAGTTAATATTCATAGCTAAAGTTTGATTATGTGAGGGTTTTTTGGCAAGCAAAAGACGGCATACGAGATCCACGTCAACACGTCACATGTTCGCCGTCTTCGT	CLL-H-048668	SIK2	Homo sapiens salt-inducible kinase 2 (SIK2), mRNA.	DKFZp434K1115; QIK; LOH11CR1I; KIAA0781; SIK2	23235	NM_015191.1	38569459	NP_056006.1	11	11q23.1b	3.88993	8.32705	6.10849	3.13751	51.3632	14.7025	20.2645	17.4835	3.93298	22.4954	2.40689	3.31744	2.86217	0.643854	0.0854609	0		2.15653
20806	TGACCACACAGTGTTGTG	CCTCCCTTCATCTTCAGATGA	TAGAAGACGCACCGGCCTCCCTTTATCTTTAGATGAGTTAATATTCATAGCTCATCTGAAGATGAAGGGAGGTTTTTTGGCAAGCAAAAGACGGCATACGAGATCCCACAACACTGTGTGGTCATTCGCCGTCTTCGT	CLL-H-048280	SERPINB8	Homo sapiens serpin peptidase inhibitor, clade B (ovalbumin), member 8 (SERPINB8), transcript variant 1, mRNA.	CAP2; PI8	5271	NM_001031848.1	38504672	NP_002631.3	18	18q21.33b-q22.1a	39.4991	28.3659	33.9325	7.87234	23.2	183.69	10.2653	96.9778	122.63	126.452	5.4134	0.302522	2.85796	3.61393	0.543519	0		2.15143
3368	CATGGTTGTGTGCAACCA	CCAGAATGTATAGACAGGAAA	TAGAAGACGCACCGGCCAGAATGTATAGATAGGAAAGTTAATATTCATAGCTTTCCTGTCTATACATTCTGGTTTTTTGGCAAGCAAAAGACGGCATACGAGATCCTGGTTGCACACAACCATGTTCGCCGTCTTCGT	CLL-H-030842	CHL1	Homo sapiens cell adhesion molecule with homology to L1CAM (close homolog of L1) (CHL1), mRNA.	MGC132578; L1CAM2; CALL; FLJ44930	10752	NM_006614.2	27894375	NP_006605.2	3	3p26.3c	30.1845	29.0927	29.6386	0.771956	2.60456	69.4532	99.7639	84.6085	21.4329	25.3319	2.34333	3.36601	2.85467	0.723142	0.0683944	0		2.14744
23854	GTGTTGCAGTGTGTACTG	CGAGGCGTGGAGAAGCACATA	TAGAAGACGCACCGGCGAGGTGTGGAGAAGCATATAGTTAATATTCATAGCTATGTGCTTCTCCACGCCTCGTTTTTTGGCAAGCAAAAGACGGCATACGAGATCCCAGTACACACTGCAACACTTCGCCGTCTTCGT	CLL-H-051328	TGM6	Homo sapiens transglutaminase 6 (TGM6), mRNA.	TGY; dJ734P14.3; TGM3L	343641	NM_198994.2	148664231	NP_945345.2	20	20p13d	28.3409	37.5548	32.9478	6.51517	19.7742	161.957	26.0055	93.9811	96.132	102.289	4.91555	0.789294	2.85242	2.9177	0.464885	0		2.14471
7844	TGTGGTGTGTGTGTTGCA	CCCAAAGTGCTGGGATTACAG	TAGAAGACGCACCGGCCCAAAGTGTTGGGATTATAGGTTAATATTCATAGCCTGTAATCCCAGCACTTTGGGTTTTTTGGCAAGCAAAAGACGGCATACGAGATCCTGCAACACACACACCACATTCGCCGTCTTCGT	CLL-H-035318	GPR110	Homo sapiens G protein-coupled receptor 110 (GPR110), transcript variant 1, mRNA.	hGPCR36; FLJ22684; PGR19; MGC125952; KPG_012; FLJ30646	266977	NM_025048.2	61743939	NP_722582.2	6	6p12.3e	34.1714	24.1297	29.1506	7.10053	24.3581	97.1547	69.1104	83.1326	19.8303	23.8538	3.33286	2.37081	2.85183	0.680271	0.0684051	0		2.14399
1159	ACTGGTTGGTTGGTACAC	CACGCAACTTTGCAGTCACTT	TAGAAGACGCACCGGCACGCAACTTTGTAGTCATTTGTTAATATTCATAGCAAGTGACTGCAAAGTTGCGTGTTTTTTGGCAAGCAAAAGACGGCATACGAGATCCGTGTACCAACCAACCAGTTTCGCCGTCTTCGT	CLL-H-028633	ARSG	Homo sapiens arylsulfatase G (ARSG), mRNA.	KIAA1001	22901	NM_014960.3	45430056	NP_055775.2	17	17q24.2c	42.2776	34.7825	38.5301	5.29983	13.755	126.088	93.6142	109.851	22.9628	20.9035	3.27247	2.42964	2.85105	0.59597	0.0504921	0		2.14305
27007	TGACTGTGACCACAACCA	TCCGAGAAACAGAGATTCTAA	TAGAAGACGCACCGGTCCGAGAAATAGAGATTCTAAGTTAATATTCATAGCTTAGAATCTCTGTTTCTCGGATTTTTTGGCAAGCAAAAGACGGCATACGAGATCCTGGTTGTGGTCACAGTCATTCGCCGTCTTCGT	CLL-H-054481	ZNF425	Homo sapiens zinc finger protein 425 (ZNF425), mRNA.	MGC150568	155054	NM_001001661.1	48717240	NP_001001661.1	7	7q36.1a-q36.1b	14.6953	18.7203	16.7078	2.84609	17.0345	42.2832	52.9615	47.6224	7.55073	15.8554	2.53075	3.16987	2.85031	0.451929	0.0324182	0		2.14214
15250	TGGTTGTGGTCAGTACTG	CTCTCATATAGGTGCCATCTT	TAGAAGACGCACCGGCTCTCATATAGGTGCTATCTTGTTAATATTCATAGCAAGATGGCACCTATATGAGAGTTTTTTGGCAAGCAAAAGACGGCATACGAGATCCCAGTACTGACCACAACCATTCGCCGTCTTCGT	CLL-H-042724	OR52K2	Homo sapiens olfactory receptor, family 52, subfamily K, member 2 (OR52K2), mRNA.	OR11-7	119774	NM_001005172.2	52353263	NP_001005172.1	11	11p15.4d	9.48226	10.9228	10.2025	1.01859	9.98369	31.8574	26.2717	29.0645	3.94969	13.5894	3.1225	2.57502	2.84876	0.387129	0.0225927	0		2.14026
21872	CAACCATGGTACACTGAC	CAGTCTTTCAAGCTGTGTGTT	TAGAAGACGCACCGGCAGTCTTTCAAGTTGTGTGTTGTTAATATTCATAGCAACACACAGCTTGAAAGACTGTTTTTTGGCAAGCAAAAGACGGCATACGAGATCCGTCAGTGTACCATGGTTGTTCGCCGTCTTCGT	CLL-H-049346	SLC47A1	Homo sapiens solute carrier family 47, member 1 (SLC47A1), mRNA.	FLJ10847; MATE1; MATE2; MGC64822	55244	NM_018242.2	22907059	NP_060712.2	17	17p11.2d	12.5607	35.4159	23.9883	16.1611	67.3707	81.7999	54.8625	68.3312	19.0476	27.8754	3.40999	2.28705	2.84852	0.794036	0.128735	0		2.13997
4611	ACACCAACTGACGTTGCA	CCACTCAGTATCTGCATTACT	TAGAAGACGCACCGGCCACTCAGTATCTGTATTACTGTTAATATTCATAGCAGTAATGCAGATACTGAGTGGTTTTTTGGCAAGCAAAAGACGGCATACGAGATCCTGCAACGTCAGTTGGTGTTTCGCCGTCTTCGT	CLL-H-032085	CYP4Z1	PREDICTED: Homo sapiens cytochrome P450, family 4, subfamily Z, polypeptide 1, transcript variant 3 (CYP4Z1), mRNA.		199974	NM_178134.2	88947718	XP_951034.1		1p33d	13.1605	44.0856	28.623	21.8673	76.3977	121.304	41.7267	81.5156	56.27	69.0297	4.238	1.4578	2.8479	1.9659	0.341008	0		2.13922
2070	CAGTTGCACATGTGACCA	GAATGTACCTTGGGCCTTCAT	TAGAAGACGCACCGGGAATGTACTTTGGGCCTTTATGTTAATATTCATAGCATGAAGGCCCAAGGTACATTCTTTTTTGGCAAGCAAAAGACGGCATACGAGATCCTGGTCACATGTGCAACTGTTCGCCGTCTTCGT	CLL-H-029544	C14ORF4	Homo sapiens chromosome 14 open reading frame 4 (C14orf4), mRNA.	IRF2BPL; KIAA1865; EAP1	64207	NM_024496.2	38327635	NP_078772.1	14	14q24.3c	9.73806	6.37507	8.05656	2.37799	29.5162	18.9308	26.937	22.9339	5.66125	24.6851	2.34973	3.34349	2.84661	0.702688	0.0756382	0		2.13765
26144	GTCAGTGTTGACACTGTG	CCCAGAAATTCCTGGAGGAAA	TAGAAGACGCACCGGCCCAGAAATTCTTGGAGGAAGGTTAATATTCATAGCTTTCCTCCAGGAATTTCTGGGTTTTTTGGCAAGCAAAAGACGGCATACGAGATCCCACAGTGTCAACACTGACTTCGCCGTCTTCGT	CLL-H-053618	WDR40B	Homo sapiens WD repeat domain 40B (WDR40B), mRNA.	KIAA1892L	139170	NM_178470.4	71284431	NP_848565.2	X	Xq25e	23.1191	30.5152	26.8171	5.22985	19.5019	38.3327	114.335	76.3338	53.7417	70.4035	1.42941	4.2635	2.84646	2.00401	0.324121	0		2.13747
13168	CAACCAACTGACGTACGT	CCTTGCAGTTTCCACTGACTA	TAGAAGACGCACCGGCCTTGCAGTTTCTACTGATTAGTTAATATTCATAGCTAGTCAGTGGAAACTGCAAGGTTTTTTGGCAAGCAAAAGACGGCATACGAGATCCACGTACGTCAGTTGGTTGTTCGCCGTCTTCGT	CLL-H-040642	NDUFA4L2	Homo sapiens NADH dehydrogenase (ubiquinone) 1 alpha subcomplex, 4-like 2 (NDUFA4L2), mRNA.	FLJ26118; NUOMS	56901	NM_020142.3	34147589	NP_064527.1	12	12q13.3b	10.5231	34.5334	22.5282	16.9778	75.3624	50.9815	76.99	63.9857	18.3908	28.7421	2.263	3.41749	2.84025	0.816347	0.143921	0		2.12993
4370	ACCAGTCATGACGTACGT	GCGCAATGATATTGCCCTCAT	TAGAAGACGCACCGGGCGCAATGATATTGTCCTTATGTTAATATTCATAGCATGAGGGCAATATCATTGCGCTTTTTTGGCAAGCAAAAGACGGCATACGAGATCCACGTACGTCATGACTGGTTTCGCCGTCTTCGT	CLL-H-031844	CTRC	Homo sapiens chymotrypsin C (caldecrin) (CTRC), mRNA.	ELA4; CLCR	11330	NM_007272.2	62526042	NP_009203.2	1	1p36.21a	24.4334	38.645	31.5392	10.0491	31.8624	57.4447	121.587	89.516	45.3556	50.6676	1.82138	3.85512	2.83825	1.43807	0.219618	0		2.1275
4525	GTACGTTGCAACCAACCA	GCACCACAAGGTGTACGATTT	TAGAAGACGCACCGGGCACCATAAGGTGTATGATTTGTTAATATTCATAGCAAATCGTACACCTTGTGGTGCTTTTTTGGCAAGCAAAAGACGGCATACGAGATCCTGGTTGGTTGCAACGTACTTCGCCGTCTTCGT	CLL-H-031999	CYB5A	Homo sapiens cytochrome b5 type A (microsomal) (CYB5A), transcript variant 2, mRNA.	MCB5; CYB5	1528	NM_001914.2	59853476	NP_001905.1	18	18q22.3c	22.7221	26.2894	24.5058	2.52242	10.2932	23.2074	115.846	69.5268	65.5055	94.2162	0.94702	4.72731	2.83716	2.67307	0.433876	0		2.12619
6043	CAACCAACACACCAACAC	GCACAGAAATAAACACCACTT	TAGAAGACGCACCGGGCACAGAAATAAACACTACTTGTTAATATTCATAGCAAGTGGTGTTTATTTCTGTGCTTTTTTGGCAAGCAAAAGACGGCATACGAGATCCGTGTTGGTGTGTTGGTTGTTCGCCGTCTTCGT	CLL-H-033517	ERVWE1	Homo sapiens endogenous retroviral family W, env(C7), member 1 (ERVWE1), transcript variant 1, mRNA.	HERVW; HERV-7q; Env-W; HERV-W; env; HERV-W-ENV; syncytin	30816	NM_001130925.1	48949850	NP_055405.3	7	7q21.2b	7.93864	9.6249	8.78177	1.19237	13.5778	45.9558	3.8495	24.9026	29.7736	119.56	5.23309	0.438352	2.83572	3.39039	0.524161	0		2.12444
6593	ACGTGTCATGTGACACAC	GAAGTGGAGATGCAGTCAGAT	TAGAAGACGCACCGGGAAGTGGAGATGTAGTTAGATGTTAATATTCATAGCATCTGACTGCATCTCCACTTCTTTTTTGGCAAGCAAAAGACGGCATACGAGATCCGTGTGTCACATGACACGTTTCGCCGTCTTCGT	CLL-H-034067	FBXW4	Homo sapiens F-box and WD repeat domain containing 4 (FBXW4), mRNA.	SHFM3; SHSF3; FBWD4; DAC; FBW4	6468	NM_022039.3	63079686	NP_071322.1	10	10q24.32a	10.576	6.21933	8.39768	3.08065	36.6846	26.4572	21.1485	23.8028	3.75382	15.7705	3.15054	2.51837	2.83446	0.447007	0.0462627	0		2.1229
6608	TGGTACACGTTGTGTGTG	AGAAGGATCCCAGCGCATTAA	TAGAAGACGCACCGGAGAAGGATCTCAGCGTATTAAGTTAATATTCATAGCTTAATGCGCTGGGATCCTTCTTTTTTTGGCAAGCAAAAGACGGCATACGAGATCCCACACACAACGTGTACCATTCGCCGTCTTCGT	CLL-H-034082	FCF1	Homo sapiens FCF1 small subunit (SSU) processome component homolog (S. cerevisiae) (FCF1), mRNA.	C14orf111; MGC99629; Bka; CGI-35	51077	NM_015962.4	74229022	NP_057046.1	14	14q24.3a	29.0201	32.3426	30.6813	2.34933	7.65719	77.8856	95.8764	86.881	12.7214	14.6423	2.53853	3.12491	2.83172	0.414628	0.0254848	0		2.11958
18789	ACTGGTCAGTACGTACGT	GCATCAGCTATTTGACTTGTT	TAGAAGACGCACCGGGCATCAGCTATTTGATTTGTTGTTAATATTCATAGCAACAAGTCAAATAGCTGATGCTTTTTTGGCAAGCAAAAGACGGCATACGAGATCCACGTACGTACTGACCAGTTTCGCCGTCTTCGT	CLL-H-046263	RAB30	Homo sapiens RAB30, member RAS oncogene family (RAB30), mRNA.		27314	NM_014488.3	34147670	NP_055303.2	11	11q14.1d	24.3275	30.2452	27.2864	4.18447	15.3354	101.395	53.1136	77.2544	34.1402	44.1919	3.71596	1.94653	2.83124	1.25118	0.176286	0		2.119
15569	TGACACACACGTGTTGAC	GCTCTGCACACACCTATGTAC	TAGAAGACGCACCGGGCTCTGCACACACTTATGTATGTTAATATTCATAGCGTACATAGGTGTGTGCAGAGCTTTTTTGGCAAGCAAAAGACGGCATACGAGATCCGTCAACACGTGTGTGTCATTCGCCGTCTTCGT	CLL-H-043043	OR6N2	Homo sapiens olfactory receptor, family 6, subfamily N, member 2 (OR6N2), mRNA.	OR1-23	81442	NM_001005278.1	52627157	NP_001005278.1	1	1q23.1g	24.6451	24.3582	24.5016	0.20286	0.827944	54.4245	84.2993	69.3619	21.1247	30.4557	2.22126	3.44056	2.83091	0.862176	0.0952973	0		2.1186
14669	TGTGACACACCAACACTG	GTGATCTCCTACTGCCTCATT	TAGAAGACGCACCGGGTGATCTCCTATTGCCTTATTGTTAATATTCATAGCAATGAGGCAGTAGGAGATCACTTTTTTGGCAAGCAAAAGACGGCATACGAGATCCCAGTGTTGGTGTGTCACATTCGCCGTCTTCGT	CLL-H-042143	OR2C1	Homo sapiens olfactory receptor, family 2, subfamily C, member 1 (OR2C1), mRNA.	OR2C2P; MGC95444; OLFmf3	4993	NM_012368.2	6912555	NP_036500.1	16	16p13.3c	18.3294	11.9195	15.1245	4.53249	29.968	9.43519	75.916	42.6756	47.009	110.154	0.623836	5.01941	2.82163	3.10814	0.496101	0		2.10733
3061	CAGTTGCAGTGTTGACTG	GCTGTCAGTCATAGAGGAGAT	TAGAAGACGCACCGGGCTGTTAGTTATAGAGGAGATGTTAATATTCATAGCATCTCCTCTATGACTGACAGCTTTTTTGGCAAGCAAAAGACGGCATACGAGATCCCAGTCAACACTGCAACTGTTCGCCGTCTTCGT	CLL-H-030535	CDK2AP2	Homo sapiens cyclin-dependent kinase 2 associated protein 2 (CDK2AP2), mRNA.	p14; FLJ10636; DOC-1R	10263	NM_005851.3	39725675	NP_005842.1	11	11q13.1f	2.76088	8.60738	5.68413	4.1341	72.7306	18.0368	14.0388	16.0378	2.82701	17.6272	3.17319	2.46982	2.8215	0.497352	0.0997873	0		2.10718
3222	ACCAGTGTACTGCAACAC	GCCAGCGTGAAAGCATGTATT	TAGAAGACGCACCGGGCCAGTGTGAAAGTATGTATTGTTAATATTCATAGCAATACATGCTTTCACGCTGGCTTTTTTGGCAAGCAAAAGACGGCATACGAGATCCGTGTTGCAGTACACTGGTTTCGCCGTCTTCGT	CLL-H-030696	CENPO	Homo sapiens centromere protein O (CENPO), mRNA.	MGC11266; CENP-O	79172	NM_024322.1	13236564	NP_077298.1	2	2p23.3c	41.9866	28.1479	35.0672	9.78541	27.9047	85.9195	111.721	98.8203	18.2445	18.4623	2.45013	3.18591	2.81802	0.520273	0.0488928	0		2.10296
13781	CATGTGGTACGTACTGAC	CTGAACTTTATGCGAGGTGTT	TAGAAGACGCACCGGCTGAACTTTATGTGAGGTGTTGTTAATATTCATAGCAACACCTCGCATAAAGTTCAGTTTTTTGGCAAGCAAAAGACGGCATACGAGATCCGTCAGTACGTACCACATGTTCGCCGTCTTCGT	CLL-H-041255	NRAP	Homo sapiens nebulin-related anchoring protein (NRAP), transcript variant 1, mRNA.		4892	NM_006175.3	46049091	NP_006166.3	10	10q25.3a	0.0617449	5.44061	2.75118	3.80343	138.247	6.47537	9.0297	7.75253	1.80618	23.298	2.35367	3.28212	2.81789	0.656512	0.235002	0		2.1028
25328	CAGTCACATGCAACTGGT	GCTGTGTTTGTAGACTTGGAA	TAGAAGACGCACCGGGCTGTGTTTGTAGATTTGGAAGTTAATATTCATAGCTTCCAAGTCTACAAACACAGCTTTTTTGGCAAGCAAAAGACGGCATACGAGATCCACCAGTTGCATGTGACTGTTCGCCGTCTTCGT	CLL-H-052802	TUBA1B	Homo sapiens tubulin, alpha 1b (TUBA1B), mRNA.	K-ALPHA-1	10376	NM_006082.2	57013275	NP_006073.2	12	12q13.12b	23.0044	26.85	24.9272	2.71928	10.9089	42.9235	97.4827	70.2031	38.5792	54.9537	1.72195	3.91069	2.81632	1.54767	0.239641	0		2.10089
23762	ACACTGTGGTGTACTGGT	GCTGATATTCAGCAATGAGTA	TAGAAGACGCACCGGGCTGATATTCAGTAATGAGTAGTTAATATTCATAGCTACTCATTGCTGAATATCAGCTTTTTTGGCAAGCAAAAGACGGCATACGAGATCCACCAGTACACCACAGTGTTTCGCCGTCTTCGT	CLL-H-051236	TES	Homo sapiens testis derived transcript (3 LIM domains) (TES), transcript variant 1, mRNA.	DKFZP586B2022; TESS-2; MGC1146; TESTIN; TESS	26136	NM_015641.2	23238186	NP_056456.1	7	7q31.2b	50.3398	53.264	51.8019	2.06776	3.99166	114.285	177.315	145.8	44.5684	30.5682	2.2062	3.42294	2.81457	0.860363	0.0966005	0		2.09877
26531	CACAACGTACCAACACTG	CCATGCAAATGTGGTGAATAT	TAGAAGACGCACCGGCCATGTAAATGTGGTGAATATGTTAATATTCATAGCATATTCACCACATTTGCATGGTTTTTTGGCAAGCAAAAGACGGCATACGAGATCCCAGTGTTGGTACGTTGTGTTCGCCGTCTTCGT	CLL-H-054005	ZFP112	Homo sapiens zinc finger protein 112 homolog (mouse) (ZFP112), transcript variant 1, mRNA.	Zfp112	7771	NM_001083335.1	138175846	NP_001076804.1	19	19q13.31b	0.608629	27.878	14.2433	19.2823	135.378	43.8416	36.3184	40.08	5.31974	13.2728	3.07806	2.54986	2.81396	0.373491	0.209277	0		2.09802
12659	CAGTGTACCAACACACAC	GCCATTCAAGTAGCAGACAAA	TAGAAGACGCACCGGGCCATTCAAGTAGCAGATAAAGTTAATATTCATAGCTTTGTCTGCTACTTGAATGGCTTTTTTGGCAAGCAAAAGACGGCATACGAGATCCGTGTGTGTTGGTACACTGTTCGCCGTCTTCGT	CLL-H-040133	MTM1	Homo sapiens myotubularin 1 (MTM1), mRNA.	CNM; XLMTM; MTMX	4534	NM_000252.2	4557895	NP_000243.1	X	Xq28c	19.8642	10.196	15.0301	6.8365	45.4854	66.4692	18.0879	42.2785	34.2107	80.9175	4.42241	1.20345	2.81293	2.27615	0.384456	0		2.09677
25778	GTCAGTTGACACTGTGTG	GAGCTACTTCATCAAGAAGAA	TAGAAGACGCACCGGGAGCTACTTCATTAAGAAGAAGTTAATATTCATAGCTTCTTCTTGATGAAGTAGCTCTTTTTTGGCAAGCAAAAGACGGCATACGAGATCCCACACAGTGTCAACTGACTTCGCCGTCTTCGT	CLL-H-053252	UPP1	Homo sapiens uridine phosphorylase 1 (UPP1), transcript variant 1, mRNA.	UP; UPASE; UDRPASE; UPP	7378	NM_003364.2	31742506	NP_003355.1	7	7p12.3b	17.2092	14.8994	16.0543	1.63328	10.1735	68.233	22.061	45.147	32.6486	72.3161	4.25014	1.37415	2.81214	2.03363	0.335184	0		2.09582
24553	CAGTACACACACCAACTG	CGGAGAGGTCAGTAACTAAAT	TAGAAGACGCACCGGCGGAGAGGTCAGTAATTAAATGTTAATATTCATAGCATTTAGTTACTGACCTCTCCGTTTTTTGGCAAGCAAAAGACGGCATACGAGATCCCAGTTGGTGTGTGTACTGTTCGCCGTCTTCGT	CLL-H-052027	TPM1	Homo sapiens tropomyosin 1 (alpha) (TPM1), transcript variant 3, mRNA.	TPM1-alpha; TMSA; HTM-alpha; TPM1-kappa; C15orf13	7168	NM_000366.5	63252895	NP_001018004.1	15	15q22.2b	6.80076	0.0519142	3.42634	4.77216	139.279	10.8487	8.41187	9.63027	1.72307	17.8922	3.16625	2.45506	2.81066	0.502889	0.225906	0		2.09402
20730	GTACACCACATGGTACGT	GCACTATTTGGACAGCATCAA	TAGAAGACGCACCGGGCACTATTTGGACAGTATCAAGTTAATATTCATAGCTTGATGCTGTCCAAATAGTGCTTTTTTGGCAAGCAAAAGACGGCATACGAGATCCACGTACCATGTGGTGTACTTCGCCGTCTTCGT	CLL-H-048204	SERPINA11	Homo sapiens serpin peptidase inhibitor, clade A (alpha-1 antiproteinase, antitrypsin), member 11 (SERPINA11), mRNA.		256394	NM_001080451.1	122937296	NP_001073920.1	14	14q32.13a	22.7398	15.6366	19.1882	5.02273	26.1762	56.6716	51.1841	53.9278	3.88021	7.19519	2.95346	2.66748	2.81047	0.202219	0.0162832	0		2.09379
12740	CAGTTGTGTGACACTGGT	CCTGTGAATTACTGCTACAAT	TAGAAGACGCACCGGCCTGTGAATTACTGCTATAATGTTAATATTCATAGCATTGTAGCAGTAATTCACAGGTTTTTTGGCAAGCAAAAGACGGCATACGAGATCCACCAGTGTCACACAACTGTTCGCCGTCTTCGT	CLL-H-040214	MUC4	Homo sapiens mucin 4, cell surface associated (MUC4), transcript variant 1, mRNA.	HSA276359	4585	NM_004532.4	112382234	NP_060876.3	3	3q29e-q29f	11.5375	26.5386	19.038	10.6074	55.7167	49.8217	57.0962	53.4589	5.14385	9.62207	2.61696	2.99906	2.80801	0.270188	0.0539473	0		2.0908
2875	TGGTCAGTTGGTACACAC	GCACTTATGACTACAGTCAAT	TAGAAGACGCACCGGGCACTTATGACTACAGTTAATGTTAATATTCATAGCATTGACTGTAGTCATAAGTGCTTTTTTGGCAAGCAAAAGACGGCATACGAGATCCGTGTGTACCAACTGACCATTCGCCGTCTTCGT	CLL-H-030349	CCRL1	Homo sapiens chemokine (C-C motif) receptor-like 1 (CCRL1), transcript variant 1, mRNA.	CCBP2; CCR11; PPR1; CCX-CKR; CC-CKR-11; VSHK1; CCR10; CKR-11	51554	NM_016557.2	30795216	NP_848540.1	3	3q22.1c	47.6406	36.558	42.0993	7.83659	18.6145	61.4677	174.957	118.213	80.2494	67.8857	1.46006	4.15583	2.80795	1.90619	0.313559	0		2.09073
6002	TGTGACCAACACTGACCA	CCGGACTTATAGCCCTAAGAA	TAGAAGACGCACCGGCCGGATTTATAGCCTTAAGAAGTTAATATTCATAGCTTCTTAGGGCTATAAGTCCGGTTTTTTGGCAAGCAAAAGACGGCATACGAGATCCTGGTCAGTGTTGGTCACATTCGCCGTCTTCGT	CLL-H-033476	ERCC6	Homo sapiens excision repair cross-complementing rodent repair deficiency, complementation group 6 (ERCC6), mRNA.	CSB; COFS1; COFS; ARMD5; RAD26; CKN2	2074	NM_000124.2	4557564	NP_000115.1	10	10q11.23a	15.3657	20.4127	17.8892	3.56878	19.9494	56.9011	43.5516	50.2264	9.43949	18.7939	3.18076	2.43453	2.80764	0.527665	0.0454042	0		2.09036
18095	TGTGGTACCAGTTGTGGT	CCCAACTTGTACCGCTACATA	TAGAAGACGCACCGGCCCAACTTGTATCGCTATATAGTTAATATTCATAGCTATGTAGCGGTACAAGTTGGGTTTTTTGGCAAGCAAAAGACGGCATACGAGATCCACCACAACTGGTACCACATTCGCCGTCTTCGT	CLL-H-045569	PRPF8	Homo sapiens PRP8 pre-mRNA processing factor 8 homolog (S. cerevisiae) (PRPF8), mRNA.	HPRP8; PRPC8; RP13; PRP8	10594	NM_006445.3	91208425	NP_006436.3	17	17p13.3e	15.4715	7.39259	11.4321	5.71267	49.9706	26.5659	37.5921	32.079	7.79665	24.3045	2.32381	3.2883	2.80606	0.681999	0.0943265	0		2.08843
18673	GTTGCAGTTGACACTGGT	GCTCCTGTTGATAGTACATTA	TAGAAGACGCACCGGGCTCCTGTTGATAGTATATTAGTTAATATTCATAGCTAATGTACTATCAACAGGAGCTTTTTTGGCAAGCAAAAGACGGCATACGAGATCCACCAGTGTCAACTGCAACTTCGCCGTCTTCGT	CLL-H-046147	QSER1	Homo sapiens glutamine and serine rich 1 (QSER1), mRNA.	FLJ21924	79832	NM_001076786.1	115647980	NP_001070254.1	11	11p13d	4.48092	12.5944	8.53766	5.7371	67.1975	25.3578	22.5552	23.9565	1.98174	8.27224	2.97012	2.64185	2.80598	0.232118	0.0695016	0		2.08835
8561	CATGTGTGCAGTACACTG	GATGTTTAAGAGCACAGCAAA	TAGAAGACGCACCGGGATGTTTAAGAGCACAGTAAAGTTAATATTCATAGCTTTGCTGTGCTCTTAAACATCTTTTTTGGCAAGCAAAAGACGGCATACGAGATCCCAGTGTACTGCACACATGTTCGCCGTCTTCGT	CLL-H-036035	HCRTR2	Homo sapiens hypocretin (orexin) receptor 2 (HCRTR2), mRNA.	OX2R	3062	NM_001526.3	6006037	NP_001517.1	6	6p12.1b	10.5407	13.8196	12.1802	2.31848	19.0349	36.5206	31.6705	34.0955	3.42956	10.0587	2.99837	2.60017	2.79927	0.281569	0.0173771	0		2.0802
2215	GTTGCATGTGCACAACTG	CCGCTTTGTGAGCATGTGGAT	TAGAAGACGCACCGGCCGCTTTGTGAGTATGTGGGTGTTAATATTCATAGCATCCACATGCTCACAAAGCGGTTTTTTGGCAAGCAAAAGACGGCATACGAGATCCCAGTTGTGCACATGCAACTTCGCCGTCTTCGT	CLL-H-029689	C19ORF6	Homo sapiens chromosome 19 open reading frame 6 (C19orf6), transcript variant 1, mRNA.	R32184_3; ASBABP1; MGC4022	91304	NM_001033026.1	74229024	NP_001028198.1	19	19p13.3i	8.60019	29.4354	19.0178	14.7327	77.468	36.2669	70.1845	53.2257	23.9834	45.0597	1.907	3.69047	2.79873	1.2611	0.227802	0		2.07955
15722	ACCATGTGCATGGTTGTG	CAGCTTCACACTCCCATGTAT	TAGAAGACGCACCGGCAGCTTCATACTCCTATGTATGTTAATATTCATAGCATACATGGGAGTGTGAAGCTGTTTTTTGGCAAGCAAAAGACGGCATACGAGATCCCACAACCATGCACATGGTTTCGCCGTCTTCGT	CLL-H-043196	OR8H3	Homo sapiens olfactory receptor, family 8, subfamily H, member 3 (OR8H3), mRNA.	OR11-172	390152	NM_001005201.1	52353293	NP_001005201.1	11	11q11c	9.60575	16.0727	12.8392	4.57279	35.6159	26.8317	45.0059	35.9188	12.8511	35.7782	2.08983	3.50535	2.79759	1.00093	0.139114	0		2.07816
26663	ACGTCAGTGTGTTGACAC	CCGGATTTCCTTGTCGGATAT	TAGAAGACGCACCGGCCGGATTTCTTTGTTGGATATGTTAATATTCATAGCATATCCGACAAGGAAATCCGGTTTTTTGGCAAGCAAAAGACGGCATACGAGATCCGTGTCAACACACTGACGTTTCGCCGTCTTCGT	CLL-H-054137	ZMYND8	Homo sapiens zinc finger, MYND-type containing 8 (ZMYND8), transcript variant 1, mRNA.	RACK7; PRO2893; PRKCBP1; ZMYND8; MGC31836	23613	NM_012408.3	34335261	NP_898868.1	20	20q13.12c	3.66941	0.0830628	1.87624	2.53593	135.161	8.62577	1.86297	5.24437	4.78202	91.1839	4.59738	0.992928	2.79515	2.54873	0.471681	0		2.0752
16969	CAGTTGGTGTGTTGACAC	CGGAAACATACAACGCGCTTA	TAGAAGACGCACCGGCGGAAACATATAACGCGTTTAGTTAATATTCATAGCTAAGCGCGTTGTATGTTTCCGTTTTTTGGCAAGCAAAAGACGGCATACGAGATCCGTGTCAACACACCAACTGTTCGCCGTCTTCGT	CLL-H-044443	PIP5K1B	Homo sapiens phosphatidylinositol-4-phosphate 5-kinase, type I, beta (PIP5K1B), transcript variant 2, mRNA.	MSS4; STM7	8395	NM_003558.2	4505816	NP_003549.1	9	9q21.11a	14.3601	15.1174	14.7388	0.535506	3.63332	62.3617	19.9509	41.1563	29.989	72.8661	4.23113	1.35363	2.79238	2.0347	0.339048	0		2.07184
3051	TGGTGTGTTGGTGTACCA	CCGATGAATCAGTCTCAAGTT	TAGAAGACGCACCGGCCGATGAATCAGTCTTAAGTTGTTAATATTCATAGCAACTTGAGACTGATTCATCGGTTTTTTGGCAAGCAAAAGACGGCATACGAGATCCTGGTACACCAACACACCATTCGCCGTCTTCGT	CLL-H-030525	CDH8	Homo sapiens cadherin 8, type 2 (CDH8), mRNA.	Nbla04261	1006	NM_001796.2	16306538	NP_001787.2	16	16q21c	17.1033	33.5678	25.3356	11.6421	45.9516	15.7535	125.636	70.6949	77.6989	109.907	0.621795	4.95889	2.79034	3.06679	0.500007	0		2.06936
18592	GTTGTGTGTGACCAACAC	GCACCTGCGAACCACCAGAAT	TAGAAGACGCACCGGGCACCTGTGAACCACTAGAATGTTAATATTCATAGCATTCTGGTGGTTCGCAGGTGCTTTTTTGGCAAGCAAAAGACGGCATACGAGATCCGTGTTGGTCACACACAACTTCGCCGTCTTCGT	CLL-H-046066	PVRL2	Homo sapiens poliovirus receptor-related 2 (herpesvirus entry mediator B) (PVRL2), transcript variant delta, mRNA.	PVRR2; HVEB; PRR2; CD112	5819	NM_001042724.1	112789531	NP_001036189.1	19	19q13.32a	16.0008	4.84879	10.4248	7.88563	75.6432	29.7795	28.3913	29.0854	0.981595	3.37488	2.8566	2.72344	2.79002	0.0941598	0.0799488	0		2.06897
10561	ACTGACGTACGTACACAC	GAGAATGAAGAGGTCCATGAT	TAGAAGACGCACCGGGAGAATGAAGAGGTCTATGATGTTAATATTCATAGCATCATGGACCTCTTCATTCTCTTTTTTGGCAAGCAAAAGACGGCATACGAGATCCGTGTGTACGTACGTCAGTTTCGCCGTCTTCGT	CLL-H-038035	KSR2	Homo sapiens kinase suppressor of ras 2 (KSR2), mRNA.	FLJ25965	283455	NM_173598.4	126090895	NP_775869.2	12	12q24.22b-q24.23a	11.9697	24.3374	18.1535	8.74529	48.174	84.9047	16.3105	50.6076	48.5034	95.8422	4.67703	0.898473	2.78775	2.67184	0.450036	0		2.06622
8262	ACGTACGTCAACACTGAC	GAAGCCTTGTTGATGCTGATA	TAGAAGACGCACCGGGAAGCCTTGTTGATGTTGATAGTTAATATTCATAGCTATCAGCATCAACAAGGCTTCTTTTTTGGCAAGCAAAAGACGGCATACGAGATCCGTCAGTGTTGACGTACGTTTCGCCGTCTTCGT	CLL-H-035736	GSDMB	Homo sapiens gasdermin B (GSDMB), transcript variant 1, mRNA.	PRO2521; PP4052	55876	NM_001042471.1	109689702	NP_001035936.1	17	17q12c	7.7093	8.66968	8.18949	0.679093	8.29225	21.8423	23.8004	22.8213	1.38458	6.06703	2.66711	2.90621	2.78666	0.169068	0.00550838	0		2.06489
18683	ACCATGTGCAACCAACAC	CGACAACCTCTTAGACACGTA	TAGAAGACGCACCGGCGACAACTTCTTAGACATGTAGTTAATATTCATAGCTACGTGTCTAAGAGGTTGTCGTTTTTTGGCAAGCAAAAGACGGCATACGAGATCCGTGTTGGTTGCACATGGTTTCGCCGTCTTCGT	CLL-H-046157	QSOX2	Homo sapiens quiescin Q6 sulfhydryl oxidase 2 (QSOX2), mRNA.	SOXN; QSCN6L1; RP11-83N9.4; DKFZp762A2013	169714	NM_181701.3	145580630	NP_859052.3	9	9q34.3d	69.0044	66.8136	67.909	1.54909	2.28113	296.284	82.1322	189.208	151.428	80.0327	4.36296	1.20944	2.7862	2.22987	0.374833	0		2.06434
27391	CAGTCAGTCAGTCAACCA	CCTGAACTCAGCCCTCAATAT	TAGAAGACGCACCGGCCTGAACTTAGCCCTTAATATGTTAATATTCATAGCATATTGAGGGCTGAGTTCAGGTTTTTTGGCAAGCAAAAGACGGCATACGAGATCCTGGTTGACTGACTGACTGTTCGCCGTCTTCGT	CLL-H-054865	ZNF81	Homo sapiens zinc finger protein 81 (ZNF81), mRNA.	FLJ44367; HFZ20; MRX45	347344	NM_007137.2	148727250	NP_009068.2	X	Xp11.23f	10.1173	6.46852	8.29293	2.58012	31.1122	22.3376	23.8669	23.1023	1.08138	4.68085	2.69357	2.87798	2.78578	0.130398	0.0173789	0		2.06382
9986	CAGTGTACCAACACTGCA	GCCAACTGGCACACAAAGAAA	TAGAAGACGCACCGGGCCAATTGGCACATAAAGAAAGTTAATATTCATAGCTTTCTTTGTGTGCCAGTTGGCTTTTTTGGCAAGCAAAAGACGGCATACGAGATCCTGCAGTGTTGGTACACTGTTCGCCGTCTTCGT	CLL-H-037460	KIAA0247	Homo sapiens KIAA0247 (KIAA0247), mRNA.		9766	NM_014734.3	41281456	NP_055549.1	14	14q24.1e	17.7384	9.31342	13.5259	5.95739	44.0442	42.404	32.8301	37.617	6.76979	17.9966	3.13502	2.4272	2.78111	0.500505	0.0634617	0		2.05815
11456	CACAACTGTGCACAACTG	CTGGAAATGTTTCAACTGTTT	TAGAAGACGCACCGGCTGGAAATGTTTCAACTGTTTGTTAATATTCATAGCAAACAGTTGAAACATTTCCAGTTTTTTGGCAAGCAAAAGACGGCATACGAGATCCCAGTTGTGCACAGTTGTGTTCGCCGTCTTCGT	CLL-H-038930	MAGEE1	Homo sapiens melanoma antigen family E, 1 (MAGEE1), mRNA.	KIAA1587; HCA1; DAMAGE	57692	NM_020932.2	20143481	NP_065983.1	X	Xq13.3c	30.0874	31.5846	30.836	1.05868	3.43326	59.6193	111.826	85.7225	36.9155	43.0639	1.93343	3.62646	2.77995	1.19715	0.170327	0		2.05674
8929	GTGTGTGTGTGTGTACCA	GACTTCCAAGATGAGTATAAA	TAGAAGACGCACCGGGACTTCCAAGATGAGTATAAAGTTAATATTCATAGCTTTATACTCATCTTGGAAGTCTTTTTTGGCAAGCAAAAGACGGCATACGAGATCCTGGTACACACACACACACTTCGCCGTCTTCGT	CLL-H-036403	HRC	Homo sapiens histidine rich calcium binding protein (HRC), mRNA.	MGC133236	3270	NM_002152.2	75905816	NP_002143.1	19	19q13.33a	5.76874	19.634	12.7014	9.8042	77.1902	42.851	27.7639	35.3075	10.6682	30.215	3.37373	2.1859	2.77982	0.839923	0.158086	0		2.05659
3105	ACACTGTGCACAACTGGT	CAGGAGCAGTTACAGGAAATT	TAGAAGACGCACCGGCAGGAGCAGTTATAGGAAATTGTTAATATTCATAGCAATTTCCTGTAACTGCTCCTGTTTTTTGGCAAGCAAAAGACGGCATACGAGATCCACCAGTTGTGCACAGTGTTTCGCCGTCTTCGT	CLL-H-030579	CDR2	Homo sapiens cerebellar degeneration-related protein 2, 62kDa (CDR2), mRNA.	CDR62; Yo	1039	NM_001802.1	55770831	NP_001793.1	16	16p12.1c	69.0132	76.0544	72.5338	4.97886	6.86419	183.582	218.737	201.159	24.8588	12.3578	2.53098	3.01566	2.77332	0.342721	0.0188766	0		2.0487
8271	ACCAACTGGTACTGTGCA	CCTTCTCTTCCCGGATAAGAA	TAGAAGACGCACCGGCCTTCTCTTCCTGGATAAGAGGTTAATATTCATAGCTTCTTATCCGGGAAGAGAAGGTTTTTTGGCAAGCAAAAGACGGCATACGAGATCCTGCACAGTACCAGTTGGTTTCGCCGTCTTCGT	CLL-H-035745	GSDMD	Homo sapiens gasdermin D (GSDMD), mRNA.	FLJ12150; FKSG10; DF5L	79792	NM_001166237.1	83320069	NP_079012.3	8	8q24.3g	74.9495	62.9305	68.94	8.49878	12.3278	237.547	144.523	191.035	65.7781	34.4325	3.44571	2.09635	2.77103	0.954136	0.121282	0		2.04592
21698	GTCAACTGACCATGACCA	GTTATGAACTGGCAGTCATAT	TAGAAGACGCACCGGGTTATGAACTGGCAGTTATATGTTAATATTCATAGCATATGACTGCCAGTTCATAACTTTTTTGGCAAGCAAAAGACGGCATACGAGATCCTGGTCATGGTCAGTTGACTTCGCCGTCTTCGT	CLL-H-049172	SLC2A10	Homo sapiens solute carrier family 2 (facilitated glucose transporter), member 10 (SLC2A10), mRNA.	MGC126706; ATS; GLUT10	81031	NM_030777.3	39777591	NP_110404.1	20	20q13.12c	43.3361	43.8987	43.6174	0.39779	0.911999	126.91	114.649	120.779	8.67009	7.17846	2.90962	2.62851	2.76906	0.198776	0.00626654	0		2.04353
2710	ACGTCACAACTGACACGT	GAATCGCGTGGCTCATCAAAT	TAGAAGACGCACCGGGAATCGTGTGGCTCATTAAATGTTAATATTCATAGCATTTGATGAGCCACGCGATTCTTTTTTGGCAAGCAAAAGACGGCATACGAGATCCACGTGTCAGTTGTGACGTTTCGCCGTCTTCGT	CLL-H-030184	CASP5	Homo sapiens caspase 5, apoptosis-related cysteine peptidase (CASP5), mRNA.	ICEREL-III; ICE(rel)III; MGC141966; ICH-3	838	NM_001136109.1	4757913	NP_004338.1	11	11q22.3b	10.9994	9.6872	10.3433	0.927881	8.97083	14.2796	43.0004	28.64	20.3086	70.91	1.38057	4.15731	2.76894	1.96345	0.331038	0		2.04339
21991	GTTGACTGCAGTTGACGT	GAGATTTGAAAGTGACCTTAA	TAGAAGACGCACCGGGAGATTTGAAAGTGACCTTAAGTTAATATTCATAGCTTAAGGTCACTTTCAAATCTCTTTTTTGGCAAGCAAAAGACGGCATACGAGATCCACGTCAACTGCAGTCAACTTCGCCGTCTTCGT	CLL-H-049465	SLC6A20	Homo sapiens solute carrier family 6 (proline IMINO transporter), member 20 (SLC6A20), transcript variant 2, mRNA.	MGC161475; XT3; Xtrp3; SIT1	54716	NM_020208.3	46249402	NP_071800.1	3	3p21.31j	11.5639	4.54769	8.05582	4.96124	61.5858	23.739	20.8634	22.3012	2.03339	9.11785	2.94681	2.58985	2.76833	0.252412	0.0640984	0		2.04265
2093	GTGTCACATGTGTGTGAC	CCACTCCTTTGCCACCTACTT	TAGAAGACGCACCGGCCACTCCTTTGCTACCTATTTGTTAATATTCATAGCAAGTAGGTGGCAAAGGAGTGGTTTTTTGGCAAGCAAAAGACGGCATACGAGATCCGTCACACACATGTGACACTTCGCCGTCTTCGT	CLL-H-029567	C14ORF68	Homo sapiens chromosome 14 open reading frame 68 (C14orf68), mRNA.	HDMCP; HMFN1655	283600	NM_207117.2	46397376	NP_997000.2	14	14q32.2b	10.135	9.50031	9.81765	0.448789	4.57125	30.8667	23.4867	27.1767	5.21846	19.2019	3.144	2.3923	2.76815	0.531539	0.0426303	0		2.04243
25549	CACAGTACTGGTACACGT	CGAGACTAAGACGGGTATAAT	TAGAAGACGCACCGGCGAGACTAAGATGGGTATAATGTTAATATTCATAGCATTATACCCGTCTTAGTCTCGTTTTTTGGCAAGCAAAAGACGGCATACGAGATCCACGTGTACCAGTACTGTGTTCGCCGTCTTCGT	CLL-H-053023	UBD	Homo sapiens ubiquitin D (UBD), mRNA.	UBD-3; FAT10	10537	NM_006398.3	50355987	NP_006389.1	6	6p22.1a	21.4343	39.1018	30.2681	12.4928	41.2739	51.1989	116.341	83.7697	46.0621	54.9865	1.69152	3.84367	2.76759	1.5218	0.253763	0		2.04175
8883	TGACGTTGCAACTGACCA	ACTACGGGATTAAGCCTGAAA	TAGAAGACGCACCGGACTACGGGATTAAGCTTGAAAGTTAATATTCATAGCTTTCAGGCTTAATCCCGTAGTTTTTTTGGCAAGCAAAAGACGGCATACGAGATCCTGGTCAGTTGCAACGTCATTCGCCGTCTTCGT	CLL-H-036357	HOXD9	Homo sapiens homeobox D9 (HOXD9), mRNA.	Hox-5.2; HOX4C; HOX4; Hox-4.3	3235	NM_014213.3	23397673	NP_055028.2	2	2q31.1h	59.0458	58.3101	58.6779	0.520234	0.886591	109.32	215.468	162.394	75.0575	46.2194	1.86305	3.67204	2.76755	1.27914	0.18989	0		2.04169
190	GTTGACGTCATGCACACA	GCGTTACACCCTTTCTTGACA	TAGAAGACGCACCGGGCGTTACACTCTTTCTTGATAGTTAATATTCATAGCTGTCAAGAAAGGGTGTAACGCTTTTTTGGCAAGCAAAAGACGGCATACGAGATCCTGTGTGCATGACGTCAACTTCGCCGTCTTCGT	CLL-H-027664	ACTB	Homo sapiens actin, beta (ACTB), mRNA.	PS1TP5BP1; beta-actin	60	NM_001101.3	5016088	NP_001092.1	7	7p22.1c	12.4019	10.1648	11.2834	1.58187	14.0195	25.5995	36.8126	31.206	7.92892	25.4083	2.26878	3.26256	2.76567	0.702709	0.0733971	0		2.03942
17530	CAACGTCAGTACTGACAC	GCATTTCCTCAAGTGTCCCAA	TAGAAGACGCACCGGGCATTTCCTTAAGTGTCCTAAGTTAATATTCATAGCTTGGGACACTTGAGGAAATGCTTTTTTGGCAAGCAAAAGACGGCATACGAGATCCGTGTCAGTACTGACGTTGTTCGCCGTCTTCGT	CLL-H-045004	POU3F4	Homo sapiens POU class 3 homeobox 4 (POU3F4), mRNA.	BRN4; OTF9; BRAIN-4; DFN3	5456	NM_000307.3	110624762	NP_000298.2	X	Xq21.1d	15.5685	23.7975	19.683	5.81874	29.5623	0.0845664	108.765	54.4248	76.8487	141.202	0.00429641	5.52583	2.76506	3.90432	0.589036	0		2.03868
25420	GTGTGTACTGTGGTTGGT	GTCTAGAGGTTGACTCTTAGT	TAGAAGACGCACCGGGTCTAGAGGTTGATTCTTAGTGTTAATATTCATAGCACTAAGAGTCAACCTCTAGACTTTTTTGGCAAGCAAAAGACGGCATACGAGATCCACCAACCACAGTACACACTTCGCCGTCTTCGT	CLL-H-052894	TUSC4	Homo sapiens tumor suppressor candidate 4 (TUSC4), mRNA.	NPR2L; NPRL2	10641	NM_006545.4	50592991	NP_006536.3	3	3p21.31b	12.0844	14.5671	13.3258	1.75558	13.1744	22.6034	51.0891	36.8462	20.1424	54.6662	1.69622	3.83386	2.76504	1.51154	0.241674	0		2.03865
142	GTGTCAGTTGGTCAACCA	GCTGGAAAGAAACCTTCAAAT	TAGAAGACGCACCGGGCTGGAAAGAAACCTTTAAATGTTAATATTCATAGCATTTGAAGGTTTCTTTCCAGCTTTTTTGGCAAGCAAAAGACGGCATACGAGATCCTGGTTGACCAACTGACACTTCGCCGTCTTCGT	CLL-H-027616	ACSM3	Homo sapiens acyl-CoA synthetase medium-chain family member 3 (ACSM3), transcript variant 1, mRNA.	SA; SAH	6296	NM_005622.3	47458816	NP_005613.2	16	16p12.2c	19.7496	17.7131	18.7314	1.43997	7.68746	23.0987	80.4593	51.779	40.5601	78.3331	1.23316	4.29544	2.7643	2.16536	0.368581	0		2.03775
18486	TGGTTGCACAACACACGT	CCGAGAAATGCTGGTCACAAA	TAGAAGACGCACCGGCCGAGAAATGTTGGTCATAAAGTTAATATTCATAGCTTTGTGACCAGCATTTCTCGGTTTTTTGGCAAGCAAAAGACGGCATACGAGATCCACGTGTGTTGTGCAACCATTCGCCGTCTTCGT	CLL-H-045960	PTPN3	Homo sapiens protein tyrosine phosphatase, non-receptor type 3 (PTPN3), mRNA.	DKFZp686N0569; PTPH1	5774	NM_001145368.1	18104985	NP_002820.2	9	9q31.3a	32.6807	8.91887	20.7998	16.8022	80.7804	34.6843	80.1457	57.415	32.146	55.9889	1.66753	3.8532	2.76036	1.5455	0.289575	0		2.03298
16850	GTTGACCACAGTTGTGAC	CGCCAACATGTGCAAGCACAA	TAGAAGACGCACCGGCGCCAACATGTGTAAGCATAAGTTAATATTCATAGCTTGTGCTTGCACATGTTGGCGTTTTTTGGCAAGCAAAAGACGGCATACGAGATCCGTCACAACTGTGGTCAACTTCGCCGTCTTCGT	CLL-H-044324	PHOSPHO1	Homo sapiens phosphatase, orphan 1 (PHOSPHO1), mRNA.		162466	NM_001143804.1	31341911	NP_848595.1	17	17q21.32c	2.20518	17.1629	9.68401	10.5767	109.218	23.8598	29.5604	26.7101	4.03091	15.0913	2.46383	3.05249	2.75816	0.416244	0.167229	0		2.03031
26320	CAACACCAACTGGTACCA	GCTGGTATTATCCTTATCATT	TAGAAGACGCACCGGGCTGGTATTATCCTTATCATTGTTAATATTCATAGCAATGATAAGGATAATACCAGCTTTTTTGGCAAGCAAAAGACGGCATACGAGATCCTGGTACCAGTTGGTGTTGTTCGCCGTCTTCGT	CLL-H-053794	XRN1	Homo sapiens 5'-3' exoribonuclease 1 (XRN1), mRNA.	DKFZp686F19113; DKFZp686B22225; DKFZp434P0721; SEP1	54464	NM_001042604.1	40254886	NP_061874.2	3	3q23d	33.8186	17.2251	25.5219	11.7333	45.9736	46.0766	94.6882	70.3824	34.3736	48.8384	1.80538	3.71008	2.75773	1.34683	0.2228	0		2.02978
22243	GTCAGTCATGGTTGACAC	GCCGAGATGTTGATCCGAATA	TAGAAGACGCACCGGGCCGAGGTGTTGATCTGAATAGTTAATATTCATAGCTATTCGGATCAACATCTCGGCTTTTTTGGCAAGCAAAAGACGGCATACGAGATCCGTGTCAACCATGACTGACTTCGCCGTCTTCGT	CLL-H-049717	SMG1	Homo sapiens PI-3-kinase-related kinase SMG-1 (SMG1), mRNA.	ATX; 61E3.4; LIP; KIAA0421	23049	NM_015092.4	62243657	NP_055907.3	16	16p12.3b	14.1484	43.608	28.8782	20.8311	72.1342	35.2159	124.049	79.6324	62.8145	78.8806	1.21946	4.2956	2.75753	2.17515	0.391437	0		2.02954
18377	CAACCATGGTTGTGACTG	CTATCCTACTAATAGTGACTT	TAGAAGACGCACCGGCTATCCTACTAATAGTGACTTGTTAATATTCATAGCAAGTCACTATTAGTAGGATAGTTTTTTGGCAAGCAAAAGACGGCATACGAGATCCCAGTCACAACCATGGTTGTTCGCCGTCTTCGT	CLL-H-045851	PTGR1	Homo sapiens prostaglandin reductase 1 (PTGR1), mRNA.	MGC34943	22949	NM_001146108.1	34222094	NP_036344.1	9	9q31.3b	1.25254	11.961	6.60679	7.57205	114.61	21.6732	14.7612	18.2172	4.88751	26.8291	3.28044	2.23424	2.75734	0.73977	0.210059	0		2.02931
3099	CAGTACTGTGTGCAACGT	CGGTGGATTCAAGCCAGTTAT	TAGAAGACGCACCGGCGGTGGATTTAAGCTAGTTATGTTAATATTCATAGCATAACTGGCTTGAATCCACCGTTTTTTGGCAAGCAAAAGACGGCATACGAGATCCACGTTGCACACAGTACTGTTCGCCGTCTTCGT	CLL-H-030573	CDON	Homo sapiens Cdon homolog (mouse) (CDON), mRNA.	CDO; MGC111524; ORCAM	50937	NM_016952.4	71067337	NP_058648.3	11	11q24.2b	17.0857	7.55871	12.3222	6.7366	54.6704	16.4421	51.5073	33.9747	24.7948	72.9802	1.33435	4.18004	2.75719	2.01221	0.355591	0		2.02913
9081	ACGTTGCAACGTCAACGT	CAGTTGAAACTGTCTTGTTTA	TAGAAGACGCACCGGCAGTTGAAACTGTCTTGTTTAGTTAATATTCATAGCTAAACAAGACAGTTTCAACTGTTTTTTGGCAAGCAAAAGACGGCATACGAGATCCACGTTGACGTTGCAACGTTTCGCCGTCTTCGT	CLL-H-036555	IBTK	Homo sapiens inhibitor of Bruton agammaglobulinemia tyrosine kinase (IBTK), mRNA.	BTKI; RP1-93K22.1; MGC142256; KIAA1417; MGC142258	25998	NM_015525.2	57863303	NP_056340.2	6	6q14.1e	29.6288	18.5022	24.0655	7.86763	32.6926	81.8603	50.7754	66.3178	21.9803	33.1439	3.40156	2.10988	2.75572	0.913354	0.124723	0		2.02734
27105	TGTGACGTACCACAACCA	GCCTCAAAGAACTCCCAATTA	TAGAAGACGCACCGGGCCTCAAAGAACTCCTAATTAGTTAATATTCATAGCTAATTGGGAGTTCTTTGAGGCTTTTTTGGCAAGCAAAAGACGGCATACGAGATCCTGGTTGTGGTACGTCACATTCGCCGTCTTCGT	CLL-H-054579	ZNF543	Homo sapiens zinc finger protein 543 (ZNF543), mRNA.	MGC119384; DKFZp434H055; MGC119382	125919	NM_213598.2	47106062	NP_998763.1	19	19q13.43b	15.498	25.4068	20.4524	7.00662	34.2582	45.9437	66.7627	56.3532	14.7213	26.1232	2.24637	3.2643	2.75533	0.719781	0.089491	0		2.02687
7831	CAACCATGGTGTACACCA	CGCGGTTACCTGCTCCTCTAT	TAGAAGACGCACCGGCGCGGTTACTTGCTCCTTTATGTTAATATTCATAGCATAGAGGAGCAGGTAACCGCGTTTTTTGGCAAGCAAAAGACGGCATACGAGATCCTGGTGTACACCATGGTTGTTCGCCGTCTTCGT	CLL-H-035305	GPR101	Homo sapiens G protein-coupled receptor 101 (GPR101), mRNA.	GPCR6	83550	NM_054021.1	16876434	NP_473362.1	X	Xq26.3c	4.71026	8.70083	6.70554	2.82176	42.081	30.456	6.49188	18.4739	16.9452	91.7248	4.54191	0.968136	2.75502	2.52704	0.434837	0		2.0265
23229	GTGTACTGACACCATGAC	CGTTGCTGCGTTCTTTCAATG	TAGAAGACGCACCGGCGTTGTTGTGTTCTTTCAATGGTTAATATTCATAGCCATTGAAAGAACGCAGCAACGTTTTTTGGCAAGCAAAAGACGGCATACGAGATCCGTCATGGTGTCAGTACACTTCGCCGTCTTCGT	CLL-H-050703	SYN2	Homo sapiens synapsin II (SYN2), transcript variant IIb, mRNA.	SYNIIa; SYNII; SYNIIb	6854	NM_003178.4	119672899	NP_003169.2	3	3p25.2a	14.757	4.82803	9.79253	7.02087	71.6962	25.382	28.5433	26.9627	2.23541	8.29076	2.59197	2.91481	2.75339	0.228277	0.0810397	0		2.02451
25708	GTTGCATGCAACACTGTG	GCTTTGCTACATGAACACCAA	TAGAAGACGCACCGGGCTTTGCTACATGAACATCAAGTTAATATTCATAGCTTGGTGTTCATGTAGCAAAGCTTTTTTGGCAAGCAAAAGACGGCATACGAGATCCCACAGTGTTGCATGCAACTTCGCCGTCTTCGT	CLL-H-053182	UNC13D	Homo sapiens unc-13 homolog D (C. elegans) (UNC13D), mRNA.	Munc13-4; FHL3; HLH3; HPLH3	201294	NM_199242.2	120432045	NP_954712.1	17	17q25.1d	31.2165	39.0707	35.1436	5.55375	15.803	42.1503	151.366	96.7583	77.2273	79.8147	1.19937	4.30708	2.75323	2.19748	0.37732	0		2.02432
7279	CATGTGGTACTGGTACGT	CCTGTGGATGAAACCCTGATT	TAGAAGACGCACCGGCCTGTGGGTGAAACCTTGATTGTTAATATTCATAGCAATCAGGGTTTCATCCACAGGTTTTTTGGCAAGCAAAAGACGGCATACGAGATCCACGTACCAGTACCACATGTTCGCCGTCTTCGT	CLL-H-034753	GALM	Homo sapiens galactose mutarotase (aldose 1-epimerase) (GALM), mRNA.	BLOCK 25	130589	NM_138801.2	20270354	NP_620156.1	2	2p22.1c	3.97814	4.24659	4.11236	0.189821	4.61586	6.25791	16.339	11.2985	7.1284	63.0918	1.52173	3.97314	2.74744	1.73341	0.290174	0		2.01729
5345	GTACGTACGTGTTGACTG	GCACTGGAATGATCTGGCTTT	TAGAAGACGCACCGGGCACTGGGATGATTTGGCTTTGTTAATATTCATAGCAAAGCCAGATCATTCCAGTGCTTTTTTGGCAAGCAAAAGACGGCATACGAGATCCCAGTCAACACGTACGTACTTCGCCGTCTTCGT	CLL-H-032819	DSTYK	Homo sapiens dual serine/threonine and tyrosine protein kinase (DSTYK), transcript variant 1, mRNA.		25778	NM_015375.2	218563733	NP_056190.1	1	1q32.1g	15.9126	9.31342	12.613	4.66629	36.996	14.038	55.1857	34.6119	29.0958	84.0631	1.11298	4.37531	2.74415	2.30681	0.401774	0		2.01329
15096	ACACCATGGTTGGTTGTG	GTGCTGTGCTCACCTTCTATG	TAGAAGACGCACCGGGTGCTGTGTTCACTTTCTATGGTTAATATTCATAGCCATAGAAGGTGAGCACAGCACTTTTTTGGCAAGCAAAAGACGGCATACGAGATCCCACAACCAACCATGGTGTTTCGCCGTCTTCGT	CLL-H-042570	OR51A7	Homo sapiens olfactory receptor, family 51, subfamily A, member 7 (OR51A7), mRNA.	OR11-27	119687	NM_001004749.1	52317139	NP_001004749.1	11	11p15.4c	57.3611	43.1407	50.2509	10.0553	20.0101	222.156	53.4748	137.815	119.276	86.5474	4.42093	1.06416	2.74255	2.3736	0.409577	0		2.01135
3508	CAGTTGCATGCATGTGCA	CCTGTGCATGAGCTGTATTCT	TAGAAGACGCACCGGCCTGTGTATGAGTTGTATTCTGTTAATATTCATAGCAGAATACAGCTCATGCACAGGTTTTTTGGCAAGCAAAAGACGGCATACGAGATCCTGCACATGCATGCAACTGTTCGCCGTCTTCGT	CLL-H-030982	CKS2	Homo sapiens CDC28 protein kinase regulatory subunit 2 (CKS2), mRNA.	CKSHS2	1164	NM_001827.1	4502858	NP_001818.1	9	9q22.2a	12.6577	9.77026	11.214	2.04174	18.2071	19.8731	41.6317	30.7524	15.3856	50.0307	1.77217	3.71248	2.74232	1.372	0.216981	0		2.01108
19034	TGTGACACCATGTGTGCA	CTTATACGTCTAGCCTAATTA	TAGAAGACGCACCGGCTTATACGTCTAGCCTAATTAGTTAATATTCATAGCTAATTAGGCTAGACGTATAAGTTTTTTGGCAAGCAAAAGACGGCATACGAGATCCTGCACACATGGTGTCACATTCGCCGTCTTCGT	CLL-H-046508	RANBP17	Homo sapiens RAN binding protein 17 (RANBP17), mRNA.	FLJ32916	64901	NM_022897.2	22095364	NP_075048.1	5	5q35.1c-q35.1d	9.17353	20.0493	14.6114	7.69032	52.6323	64.9832	15.1034	40.0433	35.2704	88.0807	4.44743	1.03367	2.74055	2.41389	0.42407	0		2.00893
8096	ACCATGCAGTGTACACTG	GCTTCTATTAGCCAGTCTTTA	TAGAAGACGCACCGGGCTTCTATTAGCTAGTCTTTAGTTAATATTCATAGCTAAAGACTGGCTAATAGAAGCTTTTTTGGCAAGCAAAAGACGGCATACGAGATCCCAGTGTACACTGCATGGTTTCGCCGTCTTCGT	CLL-H-035570	GPR44	Homo sapiens G protein-coupled receptor 44 (GPR44), mRNA.	CRTH2; CD294	11251	NM_004778.2	153791423	NP_004769.2	11	11q12.2a	18.1266	12.096	15.1113	4.26423	28.2188	56.3333	26.4047	41.369	21.1627	51.1559	3.7279	1.74735	2.73762	1.40046	0.227551	0		2.00538
116	GTTGACACACTGCAACGT	GCCCATATAATCCAGACACTT	TAGAAGACGCACCGGGCCCATATAATCCAGATACTTGTTAATATTCATAGCAAGTGTCTGGATTATATGGGCTTTTTTGGCAAGCAAAAGACGGCATACGAGATCCACGTTGCAGTGTGTCAACTTCGCCGTCTTCGT	CLL-H-027590	ACBD3	Homo sapiens acyl-Coenzyme A binding domain containing 3 (ACBD3), mRNA.	GOLPH1; PAP7; GOCAP1; GCP60	64746	NM_022735.3	29550827	NP_073572.2	1	1q42.12c	39.0228	35.229	37.1259	2.68262	7.22573	136.913	66.297	101.605	49.9331	49.1443	3.6878	1.78573	2.73677	1.34497	0.209785	0		2.00434
21809	CACACAACCACATGACGT	CCATTCTCATGGATTCGCCAT	TAGAAGACGCACCGGCCATTCTTATGGATTCGCTATGTTAATATTCATAGCATGGCGAATCCATGAGAATGGTTTTTTGGCAAGCAAAAGACGGCATACGAGATCCACGTCATGTGGTTGTGTGTTCGCCGTCTTCGT	CLL-H-049283	SLC38A6	Homo sapiens solute carrier family 38, member 6 (SLC38A6), mRNA.	NAT-1; MGC102697	145389	NM_001172702.1	24429573	NP_722518.1	14	14q23.1c	33.4128	13.913	23.6629	13.7885	58.2703	125.267	4.16317	64.7151	85.6333	132.324	5.29381	0.175936	2.73487	3.61888	0.572199	0		2.00204
19522	CATGCACAGTGTTGTGTG	GAGAACCTAGTCTCGTATATT	TAGAAGACGCACCGGGAGAACCTAGTCTTGTATATTGTTAATATTCATAGCAATATACGAGACTAGGTTCTCTTTTTTGGCAAGCAAAAGACGGCATACGAGATCCCACACAACACTGTGCATGTTCGCCGTCTTCGT	CLL-H-046996	RGL1	Homo sapiens ral guanine nucleotide dissociation stimulator-like 1 (RGL1), mRNA.	RGL; KIAA0959	23179	NM_015149.3	93102366	NP_055964.3	1	1q25.3e	12.1814	28.4075	20.2944	11.4736	56.5356	50.8727	60.1283	55.5005	6.54466	11.7921	2.50673	2.9628	2.73476	0.322485	0.0637289	0		2.00191
23621	GTCAACCAACCACAACAC	CGCCACCAAGGAGGAGCGTGA	TAGAAGACGCACCGGCGCCACTAAGGAGGAGTGTGAGTTAATATTCATAGCTCACGCTCCTCCTTGGTGGCGTTTTTTGGCAAGCAAAAGACGGCATACGAGATCCGTGTTGTGGTTGGTTGACTTCGCCGTCTTCGT	CLL-H-051095	TCAP	Homo sapiens titin-cap (telethonin) (TCAP), mRNA.	TELE; CMD1N; LGMD2G; telethonin; T-cap	8557	NM_003673.3	19924299	NP_003664.1	17	17q12c	19.776	14.3595	17.0678	3.83007	22.4404	44.8443	48.4847	46.6645	2.57413	5.51624	2.62743	2.84072	2.73408	0.150818	0.0119382	0		2.00107
22816	TGGTTGACACCATGTGCA	CCGCGAGAAGTTGGCGCTGTA	TAGAAGACGCACCGGCCGCGAGAGGTTGGCGTTGTAGTTAATATTCATAGCTACAGCGCCAACTTCTCGCGGTTTTTTGGCAAGCAAAAGACGGCATACGAGATCCTGCACATGGTGTCAACCATTCGCCGTCTTCGT	CLL-H-050290	SSBP4	Homo sapiens single stranded DNA binding protein 4 (SSBP4), transcript variant 1, mRNA.	MGC3181	170463	NM_001009998.2	58218982	NP_116016.1	19	19p13.11c	25.0332	21.2537	23.1434	2.67249	11.5475	11.7306	114.734	63.2324	72.8345	115.186	0.506864	4.95753	2.7322	3.14709	0.518054	0		1.99879
20819	CACAACCACATGGTACAC	GCAGCAGATAAGACAAACTTT	TAGAAGACGCACCGGGCAGCAGATAAGATAAACTTTGTTAATATTCATAGCAAAGTTTGTCTTATCTGCTGCTTTTTTGGCAAGCAAAAGACGGCATACGAGATCCGTGTACCATGTGGTTGTGTTCGCCGTCTTCGT	CLL-H-048293	SERPINI2	Homo sapiens serpin peptidase inhibitor, clade I (pancpin), member 2 (SERPINI2), mRNA.	PI14; PANCPIN; TSA2004; MEPI	5276	NM_006217.3	59814587	NP_006208.1	3	3q26.1f	36.65	16.7891	26.7196	14.0438	52.5601	14.0984	131.643	72.8709	83.1169	114.06	0.527645	4.92686	2.72725	3.11071	0.519767	0		1.99279
6719	CATGCAACACCAGTACTG	GCAAGGCTACTACTTGCAAAT	TAGAAGACGCACCGGGCAAGGCTACTACTTGTAAATGTTAATATTCATAGCATTTGCAAGTAGTAGCCTTGCTTTTTTGGCAAGCAAAAGACGGCATACGAGATCCCAGTACTGGTGTTGCATGTTCGCCGTCTTCGT	CLL-H-034193	FGF14	Homo sapiens fibroblast growth factor 14 (FGF14), transcript variant 1, mRNA.	MGC119129; FHF4; SCA27	2259	NM_004115.3	28872754	NP_004106.1	13	13q33.1a-q33.1b	8.57373	20.1427	14.3582	8.18052	56.9744	35.5783	42.7057	39.142	5.03985	12.8758	2.4779	2.9743	2.7261	0.351008	0.0676177	0		1.99139
1502	CATGTGGTGTTGACACCA	CCCAGTTTACAGCGATCAGTT	TAGAAGACGCACCGGCCCAGTTTATAGCGATTAGTTGTTAATATTCATAGCAACTGATCGCTGTAAACTGGGTTTTTTGGCAAGCAAAAGACGGCATACGAGATCCTGGTGTCAACACCACATGTTCGCCGTCTTCGT	CLL-H-028976	BAIAP2L1	Homo sapiens BAI1-associated protein 2-like 1 (BAIAP2L1), mRNA.	IRTKS	55971	NM_018842.4	34222363	NP_061330.2	7	7q21.3d	4.13691	7.16417	5.65054	2.14059	37.883	18.7013	12.0713	15.3863	4.6881	30.4694	3.30964	2.13631	2.72297	0.829673	0.116192	0		1.9876
15912	TGGTTGTGACGTTGTGTG	CTGCCAGGAGGAGAACTACCT	TAGAAGACGCACCGGCTGCTAGGAGGAGAACTATCTGTTAATATTCATAGCAGGTAGTTCTCCTCCTGGCAGTTTTTTGGCAAGCAAAAGACGGCATACGAGATCCCACACAACGTCACAACCATTCGCCGTCTTCGT	CLL-H-043386	OXT	Homo sapiens oxytocin, prepropeptide (OXT), mRNA.	MGC126890; MGC126892; OT-NPI; OT	5020	NM_000915.2	12707574	NP_000906.1	20	20p13c	9.64985	6.12588	7.88787	2.49182	31.5906	21.1537	21.7378	21.4457	0.41304	1.92598	2.6818	2.75585	2.71883	0.0523639	0.0169147	0		1.98256
10923	CAGTGTTGGTCACAACAC	CCACAAAGATTCTCATTGGCT	TAGAAGACGCACCGGCCACAAAGATTCTCATTGGTTGTTAATATTCATAGCAGCCAATGAGAATCTTTGTGGTTTTTTGGCAAGCAAAAGACGGCATACGAGATCCGTGTTGTGACCAACACTGTTCGCCGTCTTCGT	CLL-H-038397	LLGL1	Homo sapiens lethal giant larvae homolog 1 (Drosophila) (LLGL1), mRNA.	HUGL; LLGL; DLG4; HUGL1; HUGL-1	3996	NM_004140.3	62912475	NP_004131.3	17	17p11.2f	10.2849	8.07786	9.1814	1.56065	16.9979	23.5095	26.4047	24.9571	2.04727	8.20315	2.56055	2.87589	2.71822	0.22298	0.0130538	0		1.98183
4778	GTGTACCACACAGTCAAC	GACGGAAGTATTGGACATGTT	TAGAAGACGCACCGGGACGGAAGTATTGGATATGTTGTTAATATTCATAGCAACATGTCCAATACTTCCGTCTTTTTTGGCAAGCAAAAGACGGCATACGAGATCCGTTGACTGTGTGGTACACTTCGCCGTCTTCGT	CLL-H-032252	DDX43	Homo sapiens DEAD (Asp-Glu-Ala-Asp) box polypeptide 43 (DDX43), mRNA.	DKFZp434H2114; HAGE	55510	NM_018665.2	10346128	NP_061135.1	6	6q13c	18.0913	20.9422	19.5167	2.01592	10.3292	86.4752	19.5612	53.0182	47.3153	89.2436	4.43082	1.00228	2.71655	2.42435	0.422488	0		1.9798
16702	TGGTGTCAGTACCACATG	CAGTCTGAGGGAGACACAGAC	TAGAAGACGCACCGGCAGTCTGAGGGAGATACAGATGTTAATATTCATAGCGTCTGTGTCTCCCTCAGACTGTTTTTTGGCAAGCAAAAGACGGCATACGAGATCCCATGTGGTACTGACACCATTCGCCGTCTTCGT	CLL-H-044176	PGC	Homo sapiens progastricsin (pepsinogen C) (PGC), mRNA.		5225	NM_001166424.1	141803236	NP_002621.1	6	6p21.1f	57.6962	37.2848	47.4905	14.4331	30.3914	214.207	43.6847	128.946	120.577	93.5101	4.51051	0.919862	2.71519	2.53897	0.442951	0		1.97815
5817	ACTGTGCATGGTACACTG	GCCTATGCAATCAGCTTCATA	TAGAAGACGCACCGGGCCTATGCAATCAGCTTTATAGTTAATATTCATAGCTATGAAGCTGATTGCATAGGCTTTTTTGGCAAGCAAAAGACGGCATACGAGATCCCAGTGTACCATGCACAGTTTCGCCGTCTTCGT	CLL-H-033291	ELOVL4	Homo sapiens elongation of very long chain fatty acids (FEN1/Elo2, SUR4/Elo3, yeast)-like 4 (ELOVL4), mRNA.	ADMD; STGD3; STGD2	6785	NM_022726.3	21362099	NP_073563.1	6	6q14.1c-q14.1d	15.498	16.3738	15.9359	0.619266	3.88599	48.6619	37.7346	43.1983	7.72676	17.8867	3.05361	2.36791	2.71076	0.484866	0.0381253	0		1.97277
16750	ACACGTACACGTGTACGT	GCTGTGTTTGTGAGAAGAGTA	TAGAAGACGCACCGGGCTGTGTTTGTGGGAAGGGTAGTTAATATTCATAGCTACTCTTCTCACAAACACAGCTTTTTTGGCAAGCAAAAGACGGCATACGAGATCCACGTACACGTGTACGTGTTTCGCCGTCTTCGT	CLL-H-044224	PHACTR3	Homo sapiens phosphatase and actin regulator 3 (PHACTR3), transcript variant 3, mRNA.	SCAPIN1; H17739; MGC117178; C20orf101	116154	NM_080672.3	34304355	NP_899069.1	20	20q13.32b	9.85273	9.16806	9.51039	0.484136	5.0906	14.4246	37.1263	25.7755	16.0525	62.2783	1.51672	3.90376	2.71024	1.68789	0.288418	0		1.97214
8549	GTTGACTGTGGTCAACCA	GACTTGCTCTTGCCGCCTCTA	TAGAAGACGCACCGGGACTTGCTCTTGTCGCCTTTAGTTAATATTCATAGCTAGAGGCGGCAAGAGCAAGTCTTTTTTGGCAAGCAAAAGACGGCATACGAGATCCTGGTTGACCACAGTCAACTTCGCCGTCTTCGT	CLL-H-036023	HCRT	Homo sapiens hypocretin (orexin) neuropeptide precursor (HCRT), mRNA.	OX; PPOX	3060	NM_001524.1	4557634	NP_001515.1	17	17q21.2b	16.68	19.6755	18.1777	2.11817	11.6526	61.0932	37.3924	49.2428	16.7589	34.0333	3.36088	2.05705	2.70896	0.921949	0.121483	0		1.97059
26756	CAGTGTTGACCAACACAC	CGGAGCTCATTCCTTATTGAA	TAGAAGACGCACCGGCGGAGCTCATTCTTTATTGAAGTTAATATTCATAGCTTCAATAAGGAATGAGCTCCGTTTTTTGGCAAGCAAAAGACGGCATACGAGATCCGTGTGTTGGTCAACACTGTTCGCCGTCTTCGT	CLL-H-054230	ZNF189	Homo sapiens zinc finger protein 189 (ZNF189), transcript variant 2, mRNA.		7743	NM_003452.2	37574607	NP_932094.1	9	9q31.1b	6.89779	9.71835	8.30807	1.99443	24.006	31.7607	13.2119	22.4863	13.116	58.3289	3.82288	1.59025	2.70656	1.57871	0.269813	0		1.96768
8074	ACACGTGTCAGTTGTGTG	CGTGGTTTATCCACTCTCCAA	TAGAAGACGCACCGGCGTGGTTTATCTACTCTCTAAGTTAATATTCATAGCTTGGAGAGTGGATAAACCACGTTTTTTGGCAAGCAAAAGACGGCATACGAGATCCCACACAACTGACACGTGTTTCGCCGTCTTCGT	CLL-H-035548	GPR3	Homo sapiens G protein-coupled receptor 3 (GPR3), mRNA.	ACCA	2827	NM_005281.2	31377791	NP_005272.1	1	1p36.11a	35.6268	31.1174	33.3721	3.18865	9.55483	148.704	31.8986	90.3013	82.5939	91.4648	4.45593	0.955846	2.70589	2.47494	0.432771	0		1.96686
9982	CATGGTACCAACACTGGT	GATTCAGAGAACAGTGACATA	TAGAAGACGCACCGGGATTCAGAGAACAGTGATATAGTTAATATTCATAGCTATGTCACTGTTCTCTGAATCTTTTTTGGCAAGCAAAAGACGGCATACGAGATCCACCAGTGTTGGTACCATGTTCGCCGTCTTCGT	CLL-H-037456	KIAA0247	Homo sapiens KIAA0247 (KIAA0247), mRNA.		9766	NM_014734.3	41281456	NP_055549.1	14	14q24.1e	24.0717	21.4717	22.7717	1.83846	8.07343	53.8809	69.3291	61.605	10.9235	17.7316	2.36613	3.04452	2.70533	0.479697	0.038358	0		1.96618
18003	CACAACCAACACACACCA	CAGAACATTTAAGGACAGCAA	TAGAAGACGCACCGGCAGAACATTTAAGGATAGCAAGTTAATATTCATAGCTTGCTGTCCTTAAATGTTCTGTTTTTTGGCAAGCAAAAGACGGCATACGAGATCCTGGTGTGTGTTGGTTGTGTTCGCCGTCTTCGT	CLL-H-045477	PRKG1	Homo sapiens protein kinase, cGMP-dependent, type I (PRKG1), transcript variant 1, mRNA.	FLJ36117; PGK; cGKI-alpha; MGC71944; CGKI; PRKG1B; cGKI-BETA; PRKGR1B; DKFZp686K042	5592	NM_001098512.1	148612817	NP_001091982.1	10	10q11.23c-q21.1a	10.0468	30.1206	20.0837	14.1944	70.676	76.2064	32.3738	54.2901	30.9943	57.0901	3.79444	1.61194	2.70319	1.54326	0.291689	0		1.96359
1835	GTCAGTCACACACAACAC	TGGGCTCAGATACCTGCTATA	TAGAAGACGCACCGGTGGGCTTAGATACCTGTTATAGTTAATATTCATAGCTATAGCAGGTATCTGAGCCCATTTTTTGGCAAGCAAAAGACGGCATACGAGATCCGTGTTGTGTGTGACTGACTTCGCCGTCTTCGT	CLL-H-029309	BSCL2	Homo sapiens Bernardinelli-Seip congenital lipodystrophy 2 (seipin) (BSCL2), mRNA.	SPG17; MGC4694; HMN5; GNG3LG	26580	NM_001122955.2	40068504	NP_116056.3	11	11q12.3a	19.8466	19.0214	19.434	0.58351	3.00252	28.4022	76.6003	52.5013	34.0812	64.915	1.46147	3.94157	2.70152	1.75369	0.303702	0		1.96156
23654	CAACACACCACAACACCA	CTGAGGACTTGCCTTGGAAAT	TAGAAGACGCACCGGCTGAGGATTTGCTTTGGAAATGTTAATATTCATAGCATTTCCAAGGCAAGTCCTCAGTTTTTTGGCAAGCAAAAGACGGCATACGAGATCCTGGTGTTGTGGTGTGTTGTTCGCCGTCTTCGT	CLL-H-051128	TCEB3	Homo sapiens transcription elongation factor B (SIII), polypeptide 3 (110kDa, elongin A) (TCEB3), mRNA.	SIII; TCEB3A	6924	NM_003198.2	4507388	NP_003189.1	1	1p36.11d	23.4543	11.0058	17.23	8.80237	51.0874	50.1841	42.8958	46.54	5.15361	11.0735	2.91259	2.48959	2.70109	0.299106	0.0555564	0		1.96104
8172	ACGTACTGGTCAGTACTG	CCTTGAGTAATGCTTTGATTT	TAGAAGACGCACCGGCCTTGAGTAATGCTTTGATTTGTTAATATTCATAGCAAATCAAAGCATTACTCAAGGTTTTTTGGCAAGCAAAAGACGGCATACGAGATCCCAGTACTGACCAGTACGTTTCGCCGTCTTCGT	CLL-H-035646	GPRASP1	Homo sapiens G protein-coupled receptor associated sorting protein 1 (GPRASP1), transcript variant 3, mRNA.	GASP; KIAA0443; GASP1	9737	NM_001099410.1	150378527	NP_001092881.1	X	Xq22.1e	7.68283	30.5983	19.1405	16.2037	84.6562	88.7101	14.514	51.6121	52.4646	101.652	4.63467	0.758288	2.69648	2.74102	0.490982	0		1.95544
21617	GTCAACCATGGTTGTGTG	CCAGGAATGTTCACATCCAAA	TAGAAGACGCACCGGCCAGGAATGTTCACATTCAAAGTTAATATTCATAGCTTTGGATGTGAACATTCCTGGTTTTTTGGCAAGCAAAAGACGGCATACGAGATCCCACACAACCATGGTTGACTTCGCCGTCTTCGT	CLL-H-049091	SLC25A44	Homo sapiens solute carrier family 25, member 44 (SLC25A44), mRNA.	FLJ90431; KIAA0446; RP11-54H19.3	9673	NM_001135672.1	45237192	NP_055470.1	1	1q22d	30.7225	39.2472	34.9848	6.02784	17.2299	113.947	74.7089	94.328	27.7457	29.414	3.25704	2.13546	2.69625	0.793077	0.0979332	0		1.95517
21709	TGTGGTTGTGCATGACGT	GCACCTCAACAGGTAATAATA	TAGAAGACGCACCGGGCACCTCAATAGGTAATAATAGTTAATATTCATAGCTATTATTACCTGTTGAGGTGCTTTTTTGGCAAGCAAAAGACGGCATACGAGATCCACGTCATGCACAACCACATTCGCCGTCTTCGT	CLL-H-049183	SLC2A2	Homo sapiens solute carrier family 2 (facilitated glucose transporter), member 2 (SLC2A2), mRNA.	GLUT2	6514	NM_000340.1	4557850	NP_000331.1	3	3q26.2c	30.3873	36.4438	33.4156	4.28257	12.8161	89.29	90.8387	90.0644	1.09511	1.21592	2.67211	2.71846	2.69528	0.0327723	0.0030306	0		1.95399
25378	CAGTACCAGTTGACTGTG	GCTTGACTTCAATGGTTTCTA	TAGAAGACGCACCGGGCTTGACTTTAATGGTTTCTAGTTAATATTCATAGCTAGAAACCATTGAAGTCAAGCTTTTTTGGCAAGCAAAAGACGGCATACGAGATCCCACAGTCAACTGGTACTGTTCGCCGTCTTCGT	CLL-H-052852	TUBGCP2	Homo sapiens tubulin, gamma complex associated protein 2 (TUBGCP2), mRNA.	Spc97p; GCP2; SPBC97; MGC138162	10844	NM_006659.2	89363032	NP_006650.1	10	10q26.3f	28.4291	10.4036	19.4164	12.746	65.6455	63.9926	40.6526	52.3226	16.5038	31.5425	3.29581	2.09373	2.69477	0.849996	0.155321	0		1.95336
1949	TGGTGTTGGTTGACACAC	CCCACTATTGACCTGAGTCAA	TAGAAGACGCACCGGCCCACTATTGACTTGAGTTAAGTTAATATTCATAGCTTGACTCAGGTCAATAGTGGGTTTTTTGGCAAGCAAAAGACGGCATACGAGATCCGTGTGTCAACCAACACCATTCGCCGTCTTCGT	CLL-H-029423	C11ORF30	Homo sapiens chromosome 11 open reading frame 30 (C11orf30), mRNA.	GL002; FLJ90741; EMSY	56946	NM_020193.3	57164958	NP_064578.2	11	11q13.5b	13.2399	13.5392	13.3896	0.211677	1.58091	28.0881	44.0744	36.0813	11.304	31.3293	2.09776	3.2917	2.69473	0.844241	0.104945	0		1.95332
13092	ACTGCATGGTTGTGTGCA	GACGAAGGCAAGACCACAATG	TAGAAGACGCACCGGGACGAAGGTAAGACCATAATGGTTAATATTCATAGCCATTGTGGTCTTGCCTTCGTCTTTTTTGGCAAGCAAAAGACGGCATACGAGATCCTGCACACAACCATGCAGTTTCGCCGTCTTCGT	CLL-H-040566	NCAPH2	Homo sapiens non-SMC condensin II complex, subunit H2 (NCAPH2), transcript variant 2, mRNA.	MGC18000; CAP-H2; MGC8640; MGC5305; hCAP-H2; MGC2455; 384D8-2; MGC15858; 384D8_6; MGC4133	29781	NM_014551.4	148368977	NP_689512.2	22	22q13.33b	20.5258	17.0798	18.8028	2.43669	12.9592	40.0724	61.2403	50.6564	14.968	29.5481	2.13119	3.25698	2.69409	0.796053	0.0971029	0		1.95254
4774	CAACTGACACACACACTG	GCGATATTGACATGGGAGAAA	TAGAAGACGCACCGGGCGATATTGATATGGGAGAAAGTTAATATTCATAGCTTTCTCCCATGTCAATATCGCTTTTTTGGCAAGCAAAAGACGGCATACGAGATCCCAGTGTGTGTGTCAGTTGTTCGCCGTCTTCGT	CLL-H-032248	DDX3Y	Homo sapiens DEAD (Asp-Glu-Ala-Asp) box polypeptide 3, Y-linked (DDX3Y), mRNA.	DBY	8653	NM_001122665.1	13514808	NP_004651.2	Y	Yq11.21b	16.1595	16.8514	16.5054	0.489199	2.96386	38.9609	49.9675	44.4642	7.7828	17.5035	2.36049	3.02733	2.69391	0.471529	0.0367655	0		1.95232
7430	ACGTGTTGACACTGTGTG	CCTTTGTTAACGGGTTGTTTA	TAGAAGACGCACCGGCCTTTGTTAATGGGTTGTTTAGTTAATATTCATAGCTAAACAACCCGTTAACAAAGGTTTTTTGGCAAGCAAAAGACGGCATACGAGATCCCACACAGTGTCAACACGTTTCGCCGTCTTCGT	CLL-H-034904	GFM1	Homo sapiens G elongation factor, mitochondrial 1 (GFM1), nuclear gene encoding mitochondrial protein, mRNA.	FLJ12662; EFG; GFM; FLJ20773; COXPD1; hEFG1; EFG1; EGF1; FLJ13632; EFGM	85476	NM_024996.5	25306276	NP_079272.4	3	3q25.32b	21.1079	19.9974	20.5527	0.785299	3.82091	90.7881	19.9129	55.3505	50.1163	90.5437	4.41734	0.96887	2.6931	2.43844	0.429709	0		1.95135
18457	TGGTGTACACGTACACCA	GCGGTAATATACAGGTGGAAT	TAGAAGACGCACCGGGCGGTAATATATAGGTGGAATGTTAATATTCATAGCATTCCACCTGTATATTACCGCTTTTTTGGCAAGCAAAAGACGGCATACGAGATCCTGGTGTACGTGTACACCATTCGCCGTCTTCGT	CLL-H-045931	PTPN14	Homo sapiens protein tyrosine phosphatase, non-receptor type 14 (PTPN14), mRNA.	PTP36; PEZ; MGC126803	5784	NM_005401.3	34328898	NP_005392.2	1	1q41a	5.38945	9.91562	7.65254	3.20049	41.8225	28.4022	12.7556	20.5789	11.0638	53.7628	3.71148	1.66685	2.68916	1.44577	0.253374	0		1.94656
4365	TGTGACGTCACAACTGCA	CGTGAACAATGACATCACCCT	TAGAAGACGCACCGGCGTGAACAATGATATCACTCTGTTAATATTCATAGCAGGGTGATGTCATTGTTCACGTTTTTTGGCAAGCAAAAGACGGCATACGAGATCCTGCAGTTGTGACGTCACATTCGCCGTCTTCGT	CLL-H-031839	CTRB2	Homo sapiens chymotrypsinogen B2 (CTRB2), mRNA.		440387	NM_001025200.3	118498349	NP_001020371.3	16	16q23.1a	39.9049	36.5372	38.2211	2.38127	6.23026	144.56	60.9742	102.767	59.1042	57.5127	3.78221	1.5953	2.68876	1.54638	0.26276	0		1.94607
17138	CAGTTGACTGTGGTACCA	CCGCATTGATTCCAGTAACTT	TAGAAGACGCACCGGCCGCATTGATTCCAGTAATTTGTTAATATTCATAGCAAGTTACTGGAATCAATGCGGTTTTTTGGCAAGCAAAAGACGGCATACGAGATCCTGGTACCACAGTCAACTGTTCGCCGTCTTCGT	CLL-H-044612	PLCH1	Homo sapiens phospholipase C, eta 1 (PLCH1), mRNA.	DKFZp434C1372; PLCeta1; PLCL3; MGC117152	23007	NM_001130960.1	57863297	NP_055811.1	3	3q25.31a	20.2171	19.7586	19.9878	0.324205	1.62201	34.8293	72.6463	53.7378	26.7407	49.7614	1.74253	3.63453	2.68853	1.33785	0.216224	0		1.94579
17038	CAGTACGTGTGTGTACAC	GCAGCACTAACCGAGAGAAAT	TAGAAGACGCACCGGGCAGTACTAACTGAGAGAAATGTTAATATTCATAGCATTTCTCTCGGTTAGTGCTGCTTTTTTGGCAAGCAAAAGACGGCATACGAGATCCGTGTACACACACGTACTGTTCGCCGTCTTCGT	CLL-H-044512	PKD2	Homo sapiens polycystic kidney disease 2 (autosomal dominant) (PKD2), mRNA.	PC2; PKD4; APKD2; MGC138468; MGC138466	5311	NM_000297.2	33286447	NP_000288.1	4	4q22.1b	15.9655	5.29525	10.6304	7.54499	70.9758	33.0292	24.019	28.5241	6.37119	22.3362	3.10706	2.25947	2.68327	0.599339	0.124479	0		1.9394
882	TGTGCAGTACCAGTACTG	CCTGGAAATAATTCATCGTTA	TAGAAGACGCACCGGCCTGGAAATAATTCATCGTTAGTTAATATTCATAGCTAACGATGAATTATTTCCAGGTTTTTTGGCAAGCAAAAGACGGCATACGAGATCCCAGTACTGGTACTGCACATTCGCCGTCTTCGT	CLL-H-028356	AP1S2	Homo sapiens adaptor-related protein complex 1, sigma 2 subunit (AP1S2), mRNA.	MGC:1902; SIGMA1B; MRX59; DC22	8905	NM_003916.3	22027654	NP_003907.3	X	Xp22.2	30.0962	47.5535	38.8249	12.3441	31.7943	171.356	36.8412	104.098	95.1161	91.3713	4.41356	0.948907	2.68123	2.44988	0.437382	0		1.93694
13716	ACGTCAGTCACACAACGT	GCTTAGCTGATCTTTATGAAA	TAGAAGACGCACCGGGCTTAGCTGATCTTTATGAAAGTTAATATTCATAGCTTTCATAAAGATCAGCTAAGCTTTTTTGGCAAGCAAAAGACGGCATACGAGATCCACGTTGTGTGACTGACGTTTCGCCGTCTTCGT	CLL-H-041190	NPHP3	Homo sapiens nephronophthisis 3 (adolescent) (NPHP3), mRNA.	FLJ30691; FLJ36696; DKFZp781K1312; DKFZp667K242; NPH3; KIAA2000	27031	NM_153240.3	34304359	NP_694972.3	3	3q22.1c	10.8318	14.0168	12.4243	2.25215	18.1269	6.43913	60.1093	33.2742	37.9505	114.054	0.518267	4.83803	2.67815	3.05453	0.519138	0		1.93319
5774	ACGTACTGGTACCAACTG	GCTACGGGTTTGTGAACTATT	TAGAAGACGCACCGGGCTACGGGTTTGTGAATTATTGTTAATATTCATAGCAATAGTTCACAAACCCGTAGCTTTTTTGGCAAGCAAAAGACGGCATACGAGATCCCAGTTGGTACCAGTACGTTTCGCCGTCTTCGT	CLL-H-033248	ELAVL3	Homo sapiens ELAV (embryonic lethal, abnormal vision, Drosophila)-like 3 (Hu antigen C) (ELAVL3), transcript variant 1, mRNA.	PLE21; HUCL; MGC20653; HUC; DKFZp547J036	1995	NM_001420.3	49355760	NP_001411.2	19	19p13.2b	7.36529	8.87734	8.12131	1.06918	13.1651	19.0154	24.4657	21.7405	3.85399	17.7272	2.34141	3.01253	2.67697	0.474553	0.0405181	0		1.93177
8907	ACGTACTGTGGTCAACTG	GCTCCTGATATTTCGTCCTAT	TAGAAGACGCACCGGGCTCCTGATATTTCGTTCTATGTTAATATTCATAGCATAGGACGAAATATCAGGAGCTTTTTTGGCAAGCAAAAGACGGCATACGAGATCCCAGTTGACCACAGTACGTTTCGCCGTCTTCGT	CLL-H-036381	HPS3	Homo sapiens Hermansky-Pudlak syndrome 3 (HPS3), mRNA.	SUTAL; DKFZp686F0413; FLJ22704	84343	NM_032383.3	28416957	NP_115759.2	3	3q24f	30.4755	27.3069	28.8912	2.24057	7.75519	112.171	42.4871	77.3292	49.2742	63.72	3.88254	1.47059	2.67656	1.70551	0.299338	0		1.93127
24589	TGTGCAACGTTGGTACTG	ACAGTTCTACACCGCCCAGAT	TAGAAGACGCACCGGACAGTTCTATACCGCCTAGATGTTAATATTCATAGCATCTGGGCGGTGTAGAACTGTTTTTTTGGCAAGCAAAAGACGGCATACGAGATCCCAGTACCAACGTTGCACATTCGCCGTCTTCGT	CLL-H-052063	TPSAB1	Homo sapiens tryptase alpha/beta 1 (TPSAB1), mRNA.	TPS2; TPSB1; alpha II; TPS1	7177	NM_003294.3	61744442	NP_003285.2	16	16p13.3e	3.13135	33.1836	18.1575	21.2501	117.033	37.1126	60.0712	48.5919	16.2342	33.4093	2.04393	3.30835	2.67614	0.89408	0.24879	0		1.93075
8203	ACGTTGACCAGTACTGAC	CGGAAGTAGACGTAACTTATT	TAGAAGACGCACCGGCGGAAGTAGACGTAATTTATTGTTAATATTCATAGCAATAAGTTACGTCTACTTCCGTTTTTTGGCAAGCAAAAGACGGCATACGAGATCCGTCAGTACTGGTCAACGTTTCGCCGTCTTCGT	CLL-H-035677	GREM2	Homo sapiens gremlin 2, cysteine knot superfamily, homolog (Xenopus laevis) (GREM2), mRNA.	DAND3; PRDC; CKTSF1B2	64388	NM_022469.3	71164891	NP_071914.3	1	1q43d	13.2311	21.4925	17.3618	5.84172	33.647	58.9428	33.9612	46.452	17.6647	38.0278	3.39497	1.95609	2.67553	1.01745	0.157568	0		1.93002
1994	CAGTCAGTTGCAACTGTG	CTCTCTGAGTTGTTTGTCTAT	TAGAAGACGCACCGGCTCTCTGAGTTGTTTGTTTATGTTAATATTCATAGCATAGACAAACAACTCAGAGAGTTTTTTGGCAAGCAAAAGACGGCATACGAGATCCCACAGTTGCAACTGACTGTTCGCCGTCTTCGT	CLL-H-029468	C14ORF1	Homo sapiens chromosome 14 open reading frame 1 (C14orf1), mRNA.		11161	NM_007176.2	6005718	NP_009107.1	14	14q24.3b	2.9814	9.20959	6.09549	4.40399	72.25	12.6487	19.9224	16.2855	5.14324	31.5817	2.07509	3.26838	2.67173	0.843778	0.167112	0		1.92541
10517	CAGTACTGTGGTCAACCA	CCCGTCTGTTACACATGTGAA	TAGAAGACGCACCGGCCCGTTTGTTACATATGTGAAGTTAATATTCATAGCTTCACATGTGTAACAGACGGGTTTTTTGGCAAGCAAAAGACGGCATACGAGATCCTGGTTGACCACAGTACTGTTCGCCGTCTTCGT	CLL-H-037991	KRT75	Homo sapiens keratin 75 (KRT75), mRNA.	K6HF	9119	NM_004693.2	153791157	NP_004684.2	12	12q13.13d	3.81054	3.54055	3.67555	0.190914	5.19416	7.99756	11.6245	9.81105	2.56466	26.1405	2.17588	3.16267	2.66928	0.697763	0.0777416	0		1.92243
9011	GTACTGTGGTACTGTGGT	GCTGCCTATTGAAGCCAACTT	TAGAAGACGCACCGGGCTGCTTATTGAAGCCAATTTGTTAATATTCATAGCAAGTTGGCTTCAATAGGCAGCTTTTTTGGCAAGCAAAAGACGGCATACGAGATCCACCACAGTACCACAGTACTTCGCCGTCTTCGT	CLL-H-036485	HSPH1	Homo sapiens heat shock 105kDa/110kDa protein 1 (HSPH1), mRNA.	HSP105B; DKFZp686M05240; HSP105; HSP105A; NY-CO-25; KIAA0201	10808	NM_006644.2	42544158	NP_006635.2	13	13q12.3d	20.8257	26.9227	23.8742	4.31126	18.0582	55.8138	71.5722	63.693	11.1429	17.4947	2.33783	2.99789	2.66786	0.466733	0.0421882	0		1.9207
760	CAACACGTACCACAACCA	GCCAGTATTACACTGGAGTTT	TAGAAGACGCACCGGGCCAGTATTACATTGGAGTTTGTTAATATTCATAGCAAACTCCAGTGTAATACTGGCTTTTTTGGCAAGCAAAAGACGGCATACGAGATCCTGGTTGTGGTACGTGTTGTTCGCCGTCTTCGT	CLL-H-028234	ANGEL2	Homo sapiens angel homolog 2 (Drosophila) (ANGEL2), mRNA.	FLJ12793; KIAA0759L	90806	NM_144567.3	70794817	NP_653168.2	1	1q32.3c	48.7697	28.3036	38.5367	14.4717	37.553	30.2627	175.338	102.8	102.584	99.7892	0.785296	4.54989	2.66759	2.66197	0.472871	0		1.92038
17890	GTACACTGCAACTGACCA	CTCAAACATCTGGAGCCTGAA	TAGAAGACGCACCGGCTCAAACATTTGGAGCTTGAAGTTAATATTCATAGCTTCAGGCTCCAGATGTTTGAGTTTTTTGGCAAGCAAAAGACGGCATACGAGATCCTGGTCAGTTGCAGTGTACTTCGCCGTCTTCGT	CLL-H-045364	PQBP1	Homo sapiens polyglutamine binding protein 1 (PQBP1), transcript variant 1, mRNA.	SHS; NPW38; MRXS3; RENS1; MRXS8; MRX55	10084	NM_001032381.1	74027245	NP_005701.1	X	Xp11.23c	33.6686	52.1011	42.8849	13.0337	30.3924	148.39	80.3928	114.391	48.0812	42.0322	3.46019	1.87462	2.6674	1.12117	0.179487	0		1.92015
14912	CAGTTGCAGTTGGTTGGT	CCTCACTGTGATGGCCTATGA	TAGAAGACGCACCGGCCTCATTGTGATGGCTTATGAGTTAATATTCATAGCTCATAGGCCATCACAGTGAGGTTTTTTGGCAAGCAAAAGACGGCATACGAGATCCACCAACCAACTGCAACTGTTCGCCGTCTTCGT	CLL-H-042386	OR4C6	Homo sapiens olfactory receptor, family 4, subfamily C, member 6 (OR4C6), mRNA.	OR11-138	219432	NM_001004704.1	52317236	NP_001004704.1	11	11q11b	4.17219	9.00193	6.58706	3.41514	51.8462	23.5215	11.5865	17.554	8.43933	48.0763	3.57087	1.75898	2.66493	1.2812	0.230573	0		1.91714
8894	CAGTGTCAGTGTGTACCA	GAACACAGAGTTCTCAGAGCT	TAGAAGACGCACCGGGAACATAGAGTTCTCAGAGTTGTTAATATTCATAGCAGCTCTGAGAACTCTGTGTTCTTTTTTGGCAAGCAAAAGACGGCATACGAGATCCTGGTACACACTGACACTGTTCGCCGTCTTCGT	CLL-H-036368	HPCA	Homo sapiens hippocalcin (HPCA), mRNA.	BDR2	3208	NM_002143.2	19913445	NP_002134.2	1	1p35.1b	30.2109	47.6365	38.9237	12.3218	31.6562	25.986	181.421	103.703	109.909	105.984	0.667615	4.66093	2.66427	2.8237	0.49459	0		1.91635
14267	CATGCAGTTGTGGTTGAC	GACCACATTGTCTCCTTTGTA	TAGAAGACGCACCGGGACCACATTGTGTTCTTTGTAGTTAATATTCATAGCTACAAAGGAGACAATGTGGTCTTTTTTGGCAAGCAAAAGACGGCATACGAGATCCGTCAACCACAACTGCATGTTCGCCGTCTTCGT	CLL-H-041741	OR10AD1	Homo sapiens olfactory receptor, family 10, subfamily AD, member 1 (OR10AD1), mRNA.	OR10AD1P; OR12-1	121275	NM_001004134.1	51921276	NP_001004134.1	12	12q13.11c	14.5101	6.10512	10.3076	5.94319	57.6584	33.5487	21.3481	27.4484	8.62712	31.4303	3.25476	2.07111	2.66293	0.836968	0.146744	0		1.91472
13180	TGTGTGTGGTTGTGACCA	CGAGTAGTACAACACAGCAAT	TAGAAGACGCACCGGCGAGTAGTACAACACAGTAATGTTAATATTCATAGCATTGCTGTGTTGTACTACTCGTTTTTTGGCAAGCAAAAGACGGCATACGAGATCCTGGTCACAACCACACACATTCGCCGTCTTCGT	CLL-H-040654	NDUFA9	Homo sapiens NADH dehydrogenase (ubiquinone) 1 alpha subcomplex, 9, 39kDa (NDUFA9), mRNA.	MGC111043; NDUFS2L	4704	NM_005002.3	39725687	NP_004993.1	12	12p13.32a	5.67171	34.6683	20.17	20.5037	101.654	53.5064	53.912	53.7092	0.286855	0.534089	2.65277	2.67288	2.66282	0.0142219	0.146826	0		1.91459
16136	CACACATGACGTACACCA	CCTTGCGTACAACAGCTCATT	TAGAAGACGCACCGGCCTTGCGTATAACAGCTTATTGTTAATATTCATAGCAATGAGCTGTTGTACGCAAGGTTTTTTGGCAAGCAAAAGACGGCATACGAGATCCTGGTGTACGTCATGTGTGTTCGCCGTCTTCGT	CLL-H-043610	PASK	Homo sapiens PAS domain containing serine/threonine kinase (PASK), mRNA.	KIAA0135; STK37; PASKIN; DKFZp686P2031; DKFZP434O051	23178	NM_015148.2	35038527	NP_055963.2	2	2q37.3f	25.1302	32.9863	29.0583	5.55512	19.1172	89.0001	65.6221	77.3111	16.5307	21.3821	3.06282	2.2583	2.66056	0.568882	0.0595364	0		1.91184
16417	ACTGACTGACTGGTACCA	TGTTGCTAATACCCATCTTTA	TAGAAGACGCACCGGTGTTGCTAATACCCATCTTTAGTTAATATTCATAGCTAAAGATGGGTATTAGCAACATTTTTTGGCAAGCAAAAGACGGCATACGAGATCCTGGTACCAGTCAGTCAGTTTCGCCGTCTTCGT	CLL-H-043891	PDE12	Homo sapiens phosphodiesterase 12 (PDE12), mRNA.		201626	NM_177966.5	68051727	NP_808881.2	3	3p14.3a	52.8184	27.2134	40.0159	18.1054	45.2456	187.484	25.3782	106.431	114.626	107.7	4.68523	0.634203	2.65972	2.86451	0.503283	0		1.91082
8241	CAGTTGCACACAACTGTG	CAGTGGAAACTCTTCGAGATG	TAGAAGACGCACCGGCAGTGGAAATTCTTTGAGATGGTTAATATTCATAGCCATCTCGAAGAGTTTCCACTGTTTTTTGGCAAGCAAAAGACGGCATACGAGATCCCACAGTTGTGTGCAACTGTTCGCCGTCTTCGT	CLL-H-035715	GRK7	Homo sapiens G protein-coupled receptor kinase 7 (GRK7), mRNA.	GPRK7	131890	NM_139209.2	51896040	NP_631948.1	3	3q23c	5.63643	6.45813	6.04728	0.581031	9.60813	22.543	9.6095	16.0762	9.14536	56.8874	3.72779	1.58906	2.65842	1.51231	0.261768	0		1.90925
25932	CATGACACTGGTACACGT	GCCTTCATGTATTTGTCTCTA	TAGAAGACGCACCGGGCCTTCATGTATTTGTTTCTAGTTAATATTCATAGCTAGAGACAAATACATGAAGGCTTTTTTGGCAAGCAAAAGACGGCATACGAGATCCACGTGTACCAGTGTCATGTTCGCCGTCTTCGT	CLL-H-053406	USP8	Homo sapiens ubiquitin specific peptidase 8 (USP8), mRNA.	KIAA0055; FLJ34456; MGC129718; UBPY; HumORF8	9101	NM_001128610.1	41281375	NP_005145.2	15	15q21.2a	7.65637	5.57559	6.61598	1.47134	22.2391	10.0634	25.1121	17.5877	10.641	60.5025	1.52107	3.79567	2.65837	1.60838	0.28546	0		1.90919
6174	TGCAGTGTGTTGGTACTG	CCAGGCTTTAGAGCTTGATTT	TAGAAGACGCACCGGCCAGGCTTTAGAGTTTGATTTGTTAATATTCATAGCAAATCAAGCTCTAAAGCCTGGTTTTTTGGCAAGCAAAAGACGGCATACGAGATCCCAGTACCAACACACTGCATTCGCCGTCTTCGT	CLL-H-033648	EYA3	Homo sapiens eyes absent homolog 3 (Drosophila) (EYA3), mRNA.	DKFZp686C132	2140	NM_001990.2	26667242	NP_001981.2	1	1p35.3b	13.7427	21.0045	17.3736	5.1349	29.5558	42.9597	49.2451	46.1024	4.44444	9.64036	2.4727	2.83448	2.65359	0.255816	0.026821	0		1.90339
24823	ACCAGTCACATGTGACTG	CTGGCACTATACCGTTGAGTT	TAGAAGACGCACCGGCTGGCATTATACTGTTGAGTTGTTAATATTCATAGCAACTCAACGGTATAGTGCCAGTTTTTTGGCAAGCAAAAGACGGCATACGAGATCCCAGTCACATGTGACTGGTTTCGCCGTCTTCGT	CLL-H-052297	TRIM46	Homo sapiens tripartite motif-containing 46 (TRIM46), mRNA.	TRIFIC; GENEY; FLJ23229	80128	NM_025058.3	47174858	NP_079334.3	1	1q22a	7.55935	11.5976	9.57849	2.85551	29.8117	43.0926	7.6895	25.3911	25.0338	98.5929	4.49889	0.802788	2.65084	2.61354	0.468431	0		1.90005
22997	ACACACACGTCATGTGAC	CTGCTGCTGTTTGCCTGGTTT	TAGAAGACGCACCGGCTGCTGTTGTTTGCTTGGTTTGTTAATATTCATAGCAAACCAGGCAAACAGCAGCAGTTTTTTGGCAAGCAAAAGACGGCATACGAGATCCGTCACATGACGTGTGTGTTTCGCCGTCTTCGT	CLL-H-050471	STK19	Homo sapiens serine/threonine kinase 19 (STK19), transcript variant 1, mRNA.	RP1; G11; D6S60; HLA-RP1; MGC117388; D6S60E	8859	NM_004197.1	4759179	NP_004188.1	6	6p21.32b	31.931	50.2945	41.1127	12.985	31.5839	156.097	61.8202	108.959	66.6641	61.1829	3.79682	1.50367	2.65024	1.6215	0.293263	0		1.89933
2769	ACTGACTGTGACACACTG	GAGTTCAAGGAGCAGTTCAAA	TAGAAGACGCACCGGGAGTTCAAGGAGCAGTTTAAAGTTAATATTCATAGCTTTGAACTGCTCCTTGAACTCTTTTTTGGCAAGCAAAAGACGGCATACGAGATCCCAGTGTGTCACAGTCAGTTTCGCCGTCTTCGT	CLL-H-030243	CC2D1A	Homo sapiens coiled-coil and C2 domain containing 1A (CC2D1A), mRNA.	FLJ41160; FREUD-1; MRT3; FLJ20241	54862	NM_017721.4	96974984	NP_060191.3	19	19p13.12c	48.3728	47.5535	47.9631	0.579332	1.20787	157.753	96.4657	127.109	43.3364	34.0938	3.28904	2.01125	2.65014	0.903536	0.122896	0		1.8992
10301	GTGTTGTGTGCAACACCA	GCTCCCACTGTGACAGGTGTT	TAGAAGACGCACCGGGCTCCCATTGTGATAGGTGTTGTTAATATTCATAGCAACACCTGTCACAGTGGGAGCTTTTTTGGCAAGCAAAAGACGGCATACGAGATCCTGGTGTTGCACACAACACTTCGCCGTCTTCGT	CLL-H-037775	KLF6	Homo sapiens Kruppel-like factor 6 (KLF6), transcript variant 2, mRNA.	GBF; ZF9; ST12; CPBP; BCD1; PAC1; DKFZp686N0199; COPEB	1316	NM_001160124.1	56550115	NP_001291.3	10	10p15.1e	0.105848	12.8021	6.45395	8.97757	139.102	20.9483	13.2594	17.1038	5.43688	31.7875	3.24581	2.05446	2.65014	0.842411	0.287751	0		1.89919
19773	TGTGTGCACAGTTGACGT	GTGATCTGTATGATGGACTTT	TAGAAGACGCACCGGGTGATTTGTATGATGGACTTTGTTAATATTCATAGCAAAGTCCATCATACAGATCACTTTTTTGGCAAGCAAAAGACGGCATACGAGATCCACGTCAACTGTGCACACATTCGCCGTCTTCGT	CLL-H-047247	RNF11	Homo sapiens ring finger protein 11 (RNF11), mRNA.	SID1669; CGI-123; MGC51169	26994	NM_014372.4	34452682	NP_055187.1	1	1p32.3e	15.745	43.2861	29.5155	19.4745	65.9806	129.145	27.2222	78.1836	72.0703	92.1809	4.37549	0.922299	2.6489	2.44178	0.45389	0		1.89769
2437	ACGTGTACACACTGTGGT	GATTCCAAAGATCCTGTGTCT	TAGAAGACGCACCGGGATTCCAAAGATCCTGTGTTTGTTAATATTCATAGCAGACACAGGATCTTTGGAATCTTTTTTGGCAAGCAAAAGACGGCATACGAGATCCACCACAGTGTGTACACGTTTCGCCGTCTTCGT	CLL-H-029911	C6ORF66	Homo sapiens chromosome 6 open reading frame 66 (C6orf66), mRNA.	bA22L21.1; HRPAP20; My013; HSPC125	29078	NM_014165.3	7661785	NP_054884.1	6	6q16.1f	13.1781	9.86371	11.5209	2.34365	20.3426	27.2425	33.7425	30.4925	4.59626	15.0734	2.36461	2.92881	2.64671	0.398949	0.0350457	0		1.89503
10883	TGGTTGTGGTACTGACCA	GTGTCATCTGTAATGAGTGTT	TAGAAGACGCACCGGGTGTCATTTGTAATGAGTGTTGTTAATATTCATAGCAACACTCATTACAGATGACACTTTTTTGGCAAGCAAAAGACGGCATACGAGATCCTGGTCAGTACCACAACCATTCGCCGTCTTCGT	CLL-H-038357	LIMD1	Homo sapiens LIM domains containing 1 (LIMD1), mRNA.		8994	NM_014240.2	7657306	NP_055055.1	3	3p21.31j	22.7574	18.7618	20.7596	2.82532	13.6097	45.3759	64.4625	54.9192	13.4963	24.5748	2.18578	3.10519	2.64548	0.650122	0.0726979	0		1.89355
26776	ACGTCATGACCAACACTG	GCCAATTACAGAAGAGGCTAT	TAGAAGACGCACCGGGCCAATTACAGAAGAGGTTATGTTAATATTCATAGCATAGCCTCTTCTGTAATTGGCTTTTTTGGCAAGCAAAAGACGGCATACGAGATCCCAGTGTTGGTCATGACGTTTCGCCGTCTTCGT	CLL-H-054250	ZNF217	Homo sapiens zinc finger protein 217 (ZNF217), mRNA.	ZABC1	7764	NM_006526.2	40807454	NP_006517.1	20	20q13.2b	3.92521	30.6398	17.2825	18.8901	109.302	63.7389	27.6119	45.6754	25.5457	55.9288	3.68806	1.59768	2.64287	1.47812	0.333649	0		1.89037
25082	ACGTACGTACCATGTGAC	CCAGAACTTGGGCATCATCAA	TAGAAGACGCACCGGCCAGAACTTGGGTATCATTAAGTTAATATTCATAGCTTGATGATGCCCAAGTTCTGGTTTTTTGGCAAGCAAAAGACGGCATACGAGATCCGTCACATGGTACGTACGTTTCGCCGTCTTCGT	CLL-H-052556	TRPV4	Homo sapiens transient receptor potential cation channel, subfamily V, member 4 (TRPV4), transcript variant 1, mRNA.	VROAC; TRP12; VRL2; VR-OAC; OTRPC4; VRL-2	59341	NM_021625.3	22547183	NP_067638.3	12	12q24.11b	20.173	13.9857	17.0793	4.37505	25.6161	57.5051	32.735	45.1201	17.5151	38.8189	3.36694	1.91665	2.6418	1.02552	0.159191	0		1.88907
7545	CAGTCAACGTACCATGAC	CTCTCTGCGAGTGTGCATACA	TAGAAGACGCACCGGCTCTCTGTGAGTGTGCATATAGTTAATATTCATAGCTGTATGCACACTCGCAGAGAGTTTTTTGGCAAGCAAAAGACGGCATACGAGATCCGTCATGGTACGTTGACTGTTCGCCGTCTTCGT	CLL-H-035019	GJD3	Homo sapiens gap junction protein, delta 3, 31.9kDa (GJD3), mRNA.	CX31.9; Cx30.2; GJC1; GJA11	125111	NM_152219.3	148839377	NP_689343.3	17	17q21.2a	6.81841	6.64502	6.73171	0.122599	1.82122	3.35849	32.1932	17.7759	20.3892	114.702	0.498906	4.78232	2.64062	3.02883	0.523724	0		1.88764
18631	CATGTGGTCACATGTGGT	CTCCTGTCCCATGTTGGAAGT	TAGAAGACGCACCGGCTCCTGTCCTATGTTGGAGGTGTTAATATTCATAGCACTTCCAACATGGGACAGGAGTTTTTTGGCAAGCAAAAGACGGCATACGAGATCCACCACATGTGACCACATGTTCGCCGTCTTCGT	CLL-H-046105	PYCR2	Homo sapiens pyrroline-5-carboxylate reductase family, member 2 (PYCR2), mRNA.	P5CR2	29920	NM_013328.2	21361453	NP_037460.2	1	1q42.12c	0.0176414	12.3244	6.17104	8.70222	141.017	20.4047	12.1853	16.295	5.81194	35.667	3.30652	1.9746	2.64056	0.941809	0.304687	0		1.88757
15703	CAGTACTGCATGGTTGCA	CTGTGACATTGTCCCTCTTAT	TAGAAGACGCACCGGCTGTGACATTGTCCTTCTTATGTTAATATTCATAGCATAAGAGGGACAATGTCACAGTTTTTTGGCAAGCAAAAGACGGCATACGAGATCCTGCAACCATGCAGTACTGTTCGCCGTCTTCGT	CLL-H-043177	OR8D4	Homo sapiens olfactory receptor, family 8, subfamily D, member 4 (OR8D4), mRNA.	OR11-275	338662	NM_001005197.1	52353287	NP_001005197.1	11	11q24.1c	1.5348	3.11485	2.32483	1.11727	48.058	6.97069	5.30376	6.13722	1.1787	19.2057	2.99837	2.28135	2.63986	0.507004	0.0799999	0		1.88672
22061	TGACTGGTACCATGACCA	GCATTATACAGCGGCCTCTTT	TAGAAGACGCACCGGGCATTATATAGCGGCTTCTTTGTTAATATTCATAGCAAAGAGGCCGCTGTATAATGCTTTTTTGGCAAGCAAAAGACGGCATACGAGATCCTGGTCATGGTACCAGTCATTCGCCGTCTTCGT	CLL-H-049535	SLC7A5	Homo sapiens solute carrier family 7 (cationic amino acid transporter, y+ system), member 5 (SLC7A5), mRNA.	MPE16; CD98; 4F2LC; hLAT1; D16S469E; LAT1; E16	8140	NM_003486.5	71979931	NP_003477.4	16	16q24.2b	7.22416	18.7307	12.9774	8.13633	62.6961	19.5228	48.941	34.2319	20.8018	60.7674	1.50436	3.77124	2.6378	1.60292	0.310656	0		1.88423
16323	TGACACGTCATGTGTGCA	TCGGGCACTGAGCACCAATTT	TAGAAGACGCACCGGTCGGGCATTGAGCACTAATTTGTTAATATTCATAGCAAATTGGTGCTCAGTGCCCGATTTTTTGGCAAGCAAAAGACGGCATACGAGATCCTGCACACATGACGTGTCATTCGCCGTCTTCGT	CLL-H-043797	PCOLCE	Homo sapiens procollagen C-endopeptidase enhancer (PCOLCE), mRNA.	PCPE	5118	NM_002593.3	7262388	NP_002584.1	7	7q22.1c	52.245	64.2387	58.2419	8.48079	14.5613	96.1278	210.924	153.526	81.1733	52.8727	1.65049	3.62152	2.63601	1.39373	0.240519	0		1.88205
19708	GTTGACGTGTGTTGTGAC	ACTCGGCCAAGGGCAACTTTA	TAGAAGACGCACCGGACTCGGCTAAGGGTAACTTTAGTTAATATTCATAGCTAAAGTTGCCCTTGGCCGAGTTTTTTTGGCAAGCAAAAGACGGCATACGAGATCCGTCACAACACACGTCAACTTCGCCGTCTTCGT	CLL-H-047182	RIN2	Homo sapiens Ras and Rab interactor 2 (RIN2), mRNA.	RASSF4	54453	NM_018993.2	35493905	NP_061866.1	20	20p11.23b	28.6055	24.0467	26.3261	3.22361	12.2449	54.5212	84.2138	69.3675	20.9959	30.2676	2.07099	3.19887	2.63493	0.79753	0.103262	0		1.88074
24097	CAACGTACTGGTACTGGT	GATAGGTCTAAACCTTGTCAT	TAGAAGACGCACCGGGATAGGTCTAAACCTTGTTATGTTAATATTCATAGCATGACAAGGTTTAGACCTATCTTTTTTGGCAAGCAAAAGACGGCATACGAGATCCACCAGTACCAGTACGTTGTTCGCCGTCTTCGT	CLL-H-051571	TMEM147	Homo sapiens transmembrane protein 147 (TMEM147), mRNA.	MGC1936; NIFIE14	10430	NM_032635.2	34147430	NP_116024.1	19	19q13.12a	29.1524	31.6573	30.4049	1.77121	5.82543	57.9159	102.14	80.028	31.2712	39.0754	1.90482	3.35933	2.63208	1.02849	0.154361	0		1.87728
14097	CACAACTGGTCATGTGAC	CTGGGTTCCTGCAATGAAGTC	TAGAAGACGCACCGGCTGGGTTCCTGTAATGAAGTTGTTAATATTCATAGCGACTTCATTGCAGGAACCCAGTTTTTTGGCAAGCAAAAGACGGCATACGAGATCCGTCACATGACCAGTTGTGTTCGCCGTCTTCGT	CLL-H-041571	OCLN	Homo sapiens occludin (OCLN), mRNA.		4950	NM_002538.2	9257230	NP_002529.1	5	5q13.2a	20.0318	3.61323	11.8225	11.6097	98.1998	45.8108	16.415	31.1129	20.786	66.8081	3.87488	1.38845	2.63166	1.75817	0.370468	0		1.87678
14636	GTGTCACACAACCACATG	CACCTTGGGAAGTGGCTTCAT	TAGAAGACGCACCGGCACCTTGGGAAGTGGTTTAATGTTAATATTCATAGCATGAAGCCACTTCCCAAGGTGTTTTTTGGCAAGCAAAAGACGGCATACGAGATCCCATGTGGTTGTGTGACACTTCGCCGTCTTCGT	CLL-H-042110	OR2AG1	Homo sapiens olfactory receptor, family 2, subfamily AG, member 1 (OR2AG1), mRNA.	OR2AG3; OR11-79	144125	NM_001004489.2	52218871	NP_001004489.1	11	11p15.4b	15.6038	7.28876	11.4463	5.87964	51.3672	53.2889	6.91009	30.0995	32.7948	108.955	4.65556	0.603697	2.62963	2.8651	0.51149	0		1.8743
4107	GTCAACACTGGTACTGAC	GATCTCCTAAGTAACTGTGAT	TAGAAGACGCACCGGGATCTCCTAAGTAATTGTGATGTTAATATTCATAGCATCACAGTTACTTAGGAGATCTTTTTTGGCAAGCAAAAGACGGCATACGAGATCCGTCAGTACCAGTGTTGACTTCGCCGTCTTCGT	CLL-H-031581	CRISP2	Homo sapiens cysteine-rich secretory protein 2 (CRISP2), mRNA.	MGC111136; TPX1; GAPDL5; TSP1; CRISP-2	7180	NM_001142407.1	4507670	NP_003287.1	6	6p12.3b	18.6205	35.5405	27.0805	11.9642	44.1803	72.6304	69.7758	71.2031	2.01855	2.83492	2.68202	2.57661	2.62931	0.0745389	0.0357924	0		1.87392
17476	GTCATGACCATGTGTGGT	GGGTCTATTTGCTCCGCTAAA	TAGAAGACGCACCGGGGGTTTATTTGCTCCGTTAAAGTTAATATTCATAGCTTTAGCGGAGCAAATAGACCCTTTTTTGGCAAGCAAAAGACGGCATACGAGATCCACCACACATGGTCATGACTTCGCCGTCTTCGT	CLL-H-044950	POMP	Homo sapiens proteasome maturation protein (POMP), mRNA.	UMP1; HSPC014; PNAS-110; C13orf12	51371	NM_015932.4	21361533	NP_057016.1	13	13q12.3a	32.6278	38.4892	35.5585	4.14466	11.6559	85.9074	100.752	93.3299	10.497	11.2472	2.41594	2.83343	2.62469	0.295204	0.0185515	0		1.86831
25003	TGGTTGACCAACCATGAC	GAGGGAGATCCCATCTCTTTA	TAGAAGACGCACCGGGAGGGAGATTCCATTTCTTTAGTTAATATTCATAGCTAAAGAGATGGGATCTCCCTCTTTTTTGGCAAGCAAAAGACGGCATACGAGATCCGTCATGGTTGGTCAACCATTCGCCGTCTTCGT	CLL-H-052477	TROAP	Homo sapiens trophinin associated protein (tastin) (TROAP), mRNA.	TASTIN	10024	NM_001100620.1	33438581	NP_005471.2	12	12q13.12b	12.2079	7.57948	9.89367	3.27276	33.0793	24.6692	27.2317	25.9504	1.81192	6.98222	2.49344	2.75243	2.62293	0.183139	0.026082	0		1.86618
5935	CATGCATGCATGACACGT	CCTTATGCCAACTACACCTTT	TAGAAGACGCACCGGCCTTATGCCAACTACATCTTTGTTAATATTCATAGCAAAGGTGTAGTTGGCATAAGGTTTTTTGGCAAGCAAAAGACGGCATACGAGATCCACGTGTCATGCATGCATGTTCGCCGTCTTCGT	CLL-H-033409	EPHA1	Homo sapiens EPH receptor A1 (EPHA1), mRNA.	EPHT; MGC163163; EPHT1; EPH	2041	NM_005232.4	56119206	NP_005223.3	7	7q34f-q35a	19.5731	8.81504	14.1941	7.60713	53.5936	18.2663	56.1457	37.206	26.7848	71.9904	1.2869	3.95557	2.62123	1.88704	0.362949	0		1.86412
20145	GTACTGACGTACACTGAC	CAGAAGGTGAATGAAGGTGAA	TAGAAGACGCACCGGCAGAAGGTGAATGAGGGTGGAGTTAATATTCATAGCTTCACCTTCATTCACCTTCTGTTTTTTGGCAAGCAAAAGACGGCATACGAGATCCGTCAGTGTACGTCAGTACTTCGCCGTCTTCGT	CLL-H-047619	RSPH9	Homo sapiens radial spoke head 9 homolog (Chlamydomonas) (RSPH9), mRNA.	MRPS18AL1; FLJ30845	221421	NM_152732.3	142388930	NP_689945.2	6	6p21.1c	20.1289	13.3939	16.7614	4.76235	28.4126	60.1992	27.6404	43.9198	23.0226	52.4196	3.59154	1.64905	2.6203	1.37355	0.243934	0		1.86298
18063	TGCAACACACACACACAC	GACTATTTGGAGAGACTGATT	TAGAAGACGCACCGGGACTATTTGGAGAGATTGATTGTTAATATTCATAGCAATCAGTCTCTCCAAATAGTCTTTTTTGGCAAGCAAAAGACGGCATACGAGATCCGTGTGTGTGTGTGTTGCATTCGCCGTCTTCGT	CLL-H-045537	PRPF18	Homo sapiens PRP18 pre-mRNA processing factor 18 homolog (S. cerevisiae) (PRPF18), mRNA.	PRP18; FLJ10210; hPrp18	8559	NM_003675.3	91208421	NP_003666.1	10	10p13d	20.7728	15.8442	18.3085	3.485	19.0349	80.773	15.1604	47.9667	46.3951	96.7236	4.41178	0.828052	2.61991	2.53408	0.462469	0		1.86251
21554	GTTGCATGGTCATGACTG	GCCAGGTTATGCCAACACTTT	TAGAAGACGCACCGGGCCAGGTTATGTCAATACTTTGTTAATATTCATAGCAAAGTGTTGGCATAACCTGGCTTTTTTGGCAAGCAAAAGACGGCATACGAGATCCCAGTCATGACCATGCAACTTCGCCGTCTTCGT	CLL-H-049028	SLC25A3	Homo sapiens solute carrier family 25 (mitochondrial carrier; phosphate carrier), member 3 (SLC25A3), nuclear gene encoding mitochondrial protein, transcript variant 4, mRNA.	OK/SW-cl.48; PHC	5250	NM_002635.3	47132596	NP_998777.1	12	12q23.1c	58.349	30.1829	44.266	19.9164	44.9926	204.373	27.5073	115.94	125.063	107.868	4.61693	0.62141	2.61917	2.82526	0.507444	0		1.86161
5168	TGTGTGCAACTGGTACGT	GCTGTCAAAGACTTCGTGATT	TAGAAGACGCACCGGGCTGTCAAAGACTTTGTGATTGTTAATATTCATAGCAATCACGAAGTCTTTGACAGCTTTTTTGGCAAGCAAAAGACGGCATACGAGATCCACGTACCAGTTGCACACATTCGCCGTCTTCGT	CLL-H-032642	DNASE1L3	Homo sapiens deoxyribonuclease I-like 3 (DNASE1L3), mRNA.	LSD; DNAS1L3; DHP2	1776	NM_004944.2	58331226	NP_004935.1	3	3p14.3a	22.731	33.6404	28.1857	7.71416	27.3691	89.2055	58.3508	73.7782	21.8175	29.5718	3.16492	2.07023	2.61757	0.774063	0.108287	0		1.85967
8516	CACACAACACACACTGTG	CGCGGTGAAGAGCATCGACGA	TAGAAGACGCACCGGCGCGGTGAAGAGTATCGATGAGTTAATATTCATAGCTCGTCGATGCTCTTCACCGCGTTTTTTGGCAAGCAAAAGACGGCATACGAGATCCCACAGTGTGTGTTGTGTGTTCGCCGTCTTCGT	CLL-H-035990	HBZ	Homo sapiens hemoglobin, zeta (HBZ), mRNA.		3050	NM_005332.2	6633805	NP_005323.1	16	16p13.3f	21.743	48.0934	34.9182	18.6325	53.3604	28.064	154.702	91.3832	89.5469	97.9906	0.803706	4.43042	2.61707	2.56448	0.474696	0		1.85906
21618	CAACTGTGGTGTACTGAC	CCAGGTTGAAAGCTTGCAAAT	TAGAAGACGCACCGGCCAGGTTGAAAGCTTGTAAATGTTAATATTCATAGCATTTGCAAGCTTTCAACCTGGTTTTTTGGCAAGCAAAAGACGGCATACGAGATCCGTCAGTACACCACAGTTGTTCGCCGTCTTCGT	CLL-H-049092	SLC25A45	Homo sapiens solute carrier family 25, member 45 (SLC25A45), transcript variant 2, mRNA.		283130	NM_001077241.1	116235465	NP_001070709.1	11	11q13.1c	28.5703	9.65605	19.1132	13.3744	69.9747	60.018	39.9778	49.9979	14.1706	28.3423	3.14014	2.09164	2.61589	0.741403	0.154254	0		1.85763
26527	CACAACACACGTTGTGTG	GGCTATGACCAGTACTATTTA	TAGAAGACGCACCGGGGCTATGACCAGTATTATTTAGTTAATATTCATAGCTAAATAGTACTGGTCATAGCCTTTTTTGGCAAGCAAAAGACGGCATACGAGATCCCACACAACGTGTGTTGTGTTCGCCGTCTTCGT	CLL-H-054001	ZFHX3	Homo sapiens zinc finger homeobox 3 (ZFHX3), transcript variant A, mRNA.	ATBF1; ZFHX3; ATBT	463	NM_001164766.1	118498344	NP_008816.3	16	16q22.3b	3.81937	10.1544	6.9869	4.47956	64.1138	5.84716	30.6915	18.2693	17.5676	96.1589	0.836875	4.39272	2.6148	2.51436	0.47164	0		1.8563
22871	CACAACACCAGTTGTGCA	GCTGCTATTGAAGCCCTAAAT	TAGAAGACGCACCGGGCTGCTATTGAAGCCTTAAATGTTAATATTCATAGCATTTAGGGCTTCAATAGCAGCTTTTTTGGCAAGCAAAAGACGGCATACGAGATCCTGCACAACTGGTGTTGTGTTCGCCGTCTTCGT	CLL-H-050345	ST13	Homo sapiens suppression of tumorigenicity 13 (colon carcinoma) (Hsp70 interacting protein) (ST13), mRNA.	HOP; FLJ27260; AAG2; SNC6; HSPABP; PRO0786; MGC129952; FAM10A4; P48; HSPABP1; HIP; FAM10A1	6767	NM_003932.3	21237722	NP_003923.2	22	22q13.2a	23.0309	8.55547	15.7932	10.2357	64.8106	38.067	44.5212	41.2941	4.56381	11.052	2.41034	2.81901	2.61468	0.288974	0.0845078	0		1.85616
22008	CAACGTACGTGTACACTG	CTACGTGCTCTTCTACCTCTT	TAGAAGACGCACCGGCTACGTGTTCTTCTACTTCTTGTTAATATTCATAGCAAGAGGTAGAAGAGCACGTAGTTTTTTGGCAAGCAAAAGACGGCATACGAGATCCCAGTGTACACGTACGTTGTTCGCCGTCTTCGT	CLL-H-049482	SLC6A7	Homo sapiens solute carrier family 6 (neurotransmitter transporter, L-proline), member 7 (SLC6A7), mRNA.	PROT	6534	NM_014228.3	134304855	NP_055043.2	5	5q33.1c	13.725	14.2557	13.9903	0.375215	2.68196	41.0872	32.0031	36.5452	6.42339	17.5766	2.93683	2.28752	2.61217	0.45913	0.0383646	0		1.85312
23030	TGTGCATGACGTACACAC	CAGTCCGAGAATGACTATCTT	TAGAAGACGCACCGGCAGTCCGAGAATGATTATCTTGTTAATATTCATAGCAAGATAGTCATTCTCGGACTGTTTTTTGGCAAGCAAAAGACGGCATACGAGATCCGTGTGTACGTCATGCACATTCGCCGTCTTCGT	CLL-H-050504	STK32C	Homo sapiens serine/threonine kinase 32C (STK32C), mRNA.	YANK3; MGC23665; PKE; RP11-140A10.1	282974	NM_173575.2	32455268	NP_775846.2	10	10q26.3e	13.1958	10.0091	11.6024	2.25334	19.4213	41.2201	19.3806	30.3003	15.4429	50.966	3.55271	1.67039	2.61155	1.331	0.23228	0		1.85237
15535	CAGTACTGTGGTGTTGCA	GACGGATAATTCTCAGTTACA	TAGAAGACGCACCGGGACGGATAATTCTCAGTTATAGTTAATATTCATAGCTGTAACTGAGAATTATCCGTCTTTTTTGGCAAGCAAAAGACGGCATACGAGATCCTGCAACACCACAGTACTGTTCGCCGTCTTCGT	CLL-H-043009	OR6C70	Homo sapiens olfactory receptor, family 6, subfamily C, member 70 (OR6C70), mRNA.		390327	NM_001005499.1	53933271	NP_001005499.1	12	12q13.2b	5.29242	22.022	13.6572	11.8296	86.618	21.9752	49.3402	35.6577	19.35	54.2659	1.60905	3.61275	2.6109	1.41683	0.303721	0		1.85158
15865	CATGCACAGTGTTGACGT	CCTCAAGTTCTTGGACCAGTT	TAGAAGACGCACCGGCCTCAGGTTCTTGGACTAGTTGTTAATATTCATAGCAACTGGTCCAAGAACTTGAGGTTTTTTGGCAAGCAAAAGACGGCATACGAGATCCACGTCAACACTGTGCATGTTCGCCGTCTTCGT	CLL-H-043339	OVCA2	Homo sapiens ovarian tumor suppressor candidate 2 (OVCA2), mRNA.		124641	NM_080822.2	115529459	NP_543012.1	17		12.7283	21.3056	17.0169	6.06509	35.6415	51.0902	37.7441	44.4172	9.43708	21.2465	3.00231	2.21803	2.61017	0.55457	0.0745577	0		1.85069
2844	GTTGCAACTGTGACACCA	TCAGGCCAGGAAGTCATGTTT	TAGAAGACGCACCGGTCAGGCTAGGAAGTTATGTTTGTTAATATTCATAGCAAACATGACTTCCTGGCCTGATTTTTTGGCAAGCAAAAGACGGCATACGAGATCCTGGTGTCACAGTTGCAACTTCGCCGTCTTCGT	CLL-H-030318	CCNF	Homo sapiens cyclin F (CCNF), mRNA.	FBX1; FBXO1	899	NM_001761.2	4502620	NP_001752.1	16	16p13.3d	10.329	28.096	19.2125	12.5631	65.3903	75.5419	24.7129	50.1274	35.9416	71.7005	3.93191	1.28629	2.6091	1.87074	0.369656	0		1.84939
9160	GTTGCAACACACCATGTG	CCTCTCTCTGGCTTATAAAGG	TAGAAGACGCACCGGCCTCTTTCTGGTTTATAAAGGGTTAATATTCATAGCCCTTTATAAGCCAGAGAGAGGTTTTTTGGCAAGCAAAAGACGGCATACGAGATCCCACATGGTGTGTTGCAACTTCGCCGTCTTCGT	CLL-H-036634	IGHMBP2	Homo sapiens immunoglobulin mu binding protein 2 (IGHMBP2), mRNA.	SMARD1; SMUBP2; HMN6; CATF1; FLJ41171; HCSA; FLJ34220	3508	NM_002180.2	119392093	NP_002171.2	11	11q13.2b	26.2592	6.55158	16.4054	13.9354	84.9441	77.2816	8.27881	42.7802	48.7923	114.054	4.71074	0.504639	2.60769	2.97416	0.538809	0		1.84768
20032	GTTGACCAACGTACACAC	GCCAAGATCCAGGATAAGGAA	TAGAAGACGCACCGGGCCAAGATCTAGGATAAGGAGGTTAATATTCATAGCTTCCTTATCCTGGATCTTGGCTTTTTTGGCAAGCAAAAGACGGCATACGAGATCCGTGTGTACGTTGGTCAACTTCGCCGTCTTCGT	CLL-H-047506	RPS27A	Homo sapiens ribosomal protein S27a (RPS27A), mRNA.	UBCEP1; UBA80; CEP80; HUBCEP80; UBCEP80	6233	NM_001135592.1	27436941	NP_002945.1	2	2p16.1d	17.3768	20.1843	18.7805	1.98518	10.5704	58.4837	39.3505	48.9171	13.5292	27.6575	3.11406	2.09528	2.60467	0.720387	0.0893568	0		1.84401
8122	GTACACACCAGTACACCA	ACTCTCTGGATAGCCGCCTTT	TAGAAGACGCACCGGACTCTTTGGATAGCCGTCTTTGTTAATATTCATAGCAAAGGCGGCTATCCAGAGAGTTTTTTTGGCAAGCAAAAGACGGCATACGAGATCCTGGTGTACTGGTGTGTACTTCGCCGTCTTCGT	CLL-H-035596	GPR62	Homo sapiens G protein-coupled receptor 62 (GPR62), mRNA.	KPG_005; MGC26943; GPCR8	118442	NM_080865.3	145309314	NP_543141.3	3	3p21.1e	24.301	29.8611	27.0811	3.93154	14.5177	37.4871	103.575	70.5312	46.7315	66.2564	1.38425	3.82464	2.60445	1.72561	0.320361	0		1.84374
9363	CACATGTGGTACTGTGAC	CAGGATGATATTCTATCCTTT	TAGAAGACGCACCGGCAGGATGATATTCTATCCTTTGTTAATATTCATAGCAAAGGATAGAATATCATCCTGTTTTTTGGCAAGCAAAAGACGGCATACGAGATCCGTCACAGTACCACATGTGTTCGCCGTCTTCGT	CLL-H-036837	IPO13	Homo sapiens importin 13 (IPO13), mRNA.	RANBP13; KIAA0724; IMP13; KAP13	9670	NM_014652.3	41281424	NP_055467.2	1	1p34.1f	20.12	23.1953	21.6577	2.17453	10.0405	79.8548	32.9441	56.3995	33.1709	58.8141	3.68714	1.52113	2.60414	1.5316	0.27747	0		1.84336
19786	GTGTACGTTGTGACACAC	GCTTGCTGGATCATTGTATTA	TAGAAGACGCACCGGGCTTGCTGGATTATTGTATTAGTTAATATTCATAGCTAATACAATGATCCAGCAAGCTTTTTTGGCAAGCAAAAGACGGCATACGAGATCCGTGTGTCACAACGTACACTTCGCCGTCTTCGT	CLL-H-047260	RNF125	Homo sapiens ring finger protein 125 (RNF125), mRNA.	FLJ20456; MGC21737; TRAC1	54941	NM_017831.3	115387109	NP_060301.2	18	18q12.1e	16.4594	20.6307	18.5451	2.94954	15.9047	64.645	31.9366	48.2908	23.1283	47.8938	3.48583	1.72211	2.60397	1.24714	0.212962	0		1.84316
20247	ACACTGTGTGGTGTACCA	TGTGGGCTCTCTTGATGAGAA	TAGAAGACGCACCGGTGTGGGCTTTCTTGATGAGAGGTTAATATTCATAGCTTCTCATCAAGAGAGCCCACATTTTTTGGCAAGCAAAAGACGGCATACGAGATCCTGGTACACCACACAGTGTTTCGCCGTCTTCGT	CLL-H-047721	S100A13	Homo sapiens S100 calcium binding protein A13 (S100A13), transcript variant 1, mRNA.		6284	NM_001024210.1	66737367	NP_001019381.1	1	1q21.3d	22.5898	20.5788	21.5843	1.42201	6.58814	33.9474	78.3778	56.1626	31.417	55.9395	1.57278	3.63124	2.60201	1.45555	0.260214	0		1.84078
26552	CAGTACGTCAACTGACGT	GCTGTCATAGTTCATCCCATA	TAGAAGACGCACCGGGCTGTCATAGTTCATCTCATAGTTAATATTCATAGCTATGGGATGAACTATGACAGCTTTTTTGGCAAGCAAAAGACGGCATACGAGATCCACGTCAGTTGACGTACTGTTCGCCGTCTTCGT	CLL-H-054026	ZFP37	Homo sapiens zinc finger protein 37 homolog (mouse) (ZFP37), mRNA.	FLJ38524	7539	NM_003408.1	4507962	NP_003399.1	9	9q32b	12.8518	5.82478	9.33827	4.96883	53.2093	20.308	28.2772	24.2926	5.63507	23.1966	2.17471	3.0281	2.6014	0.603438	0.106428	0		1.84005
17153	TGCATGCATGACACACGT	ACTGTGAATGTATGTAGCAAT	TAGAAGACGCACCGGACTGTGAATGTATGTAGCAATGTTAATATTCATAGCATTGCTACATACATTCACAGTTTTTTTGGCAAGCAAAAGACGGCATACGAGATCCACGTGTGTCATGCATGCATTCGCCGTCTTCGT	CLL-H-044627	PLCL2	Homo sapiens phospholipase C-like 2 (PLCL2), mRNA.	PLCE2; KIAA1092; FLJ13484	23228	NM_001144382.1	142369931	NP_055999.1	3	3p24.3d	79.5275	64.5398	72.0336	10.5979	14.7124	197.752	176.992	187.372	14.6802	7.83478	2.74528	2.45707	2.60117	0.203796	0.0120983	0		1.83977
17562	ACGTGTCATGTGGTACGT	GATTGCTACAAAGGACCCTTT	TAGAAGACGCACCGGGATTGCTACAAAGGACTCTTTGTTAATATTCATAGCAAAGGGTCCTTTGTAGCAATCTTTTTTGGCAAGCAAAAGACGGCATACGAGATCCACGTACCACATGACACGTTTCGCCGTCTTCGT	CLL-H-045036	PPA1	Homo sapiens pyrophosphatase (inorganic) 1 (PPA1), mRNA.	PP1; IOPPP; MGC111556; PP; SID6-8061	5464	NM_021129.3	78482607	NP_066952.1	10	10q22.1a	4.50738	12.5632	8.53531	5.69636	66.7387	26.6263	17.7362	22.1813	6.28626	28.3404	3.11955	2.07798	2.59877	0.7365	0.150732	0		1.83685
22337	CATGTGCAACGTACTGTG	GCCTTCTGGAAACAAGTAGAA	TAGAAGACGCACCGGGCCTTCTGGAAATAAGTAGAAGTTAATATTCATAGCTTCTACTTGTTTCCAGAAGGCTTTTTTGGCAAGCAAAAGACGGCATACGAGATCCCACAGTACGTTGCACATGTTCGCCGTCTTCGT	CLL-H-049811	SNX5	Homo sapiens sorting nexin 5 (SNX5), transcript variant 1, mRNA.	FLJ10931	27131	NM_014426.2	23111046	NP_689413.1	20	20p11.23d	11.7492	9.81179	10.7805	1.36994	12.7076	41.8	14.2099	28.0049	19.5091	69.6632	3.87737	1.31811	2.59774	1.80967	0.339067	0		1.8356
2896	TGTGGTTGGTGTGTTGTG	GTGCTAGGCAAGGCTACTTCA	TAGAAGACGCACCGGGTGCTAGGCAAGGTTACTTTAGTTAATATTCATAGCTGAAGTAGCCTTGCCTAGCACTTTTTTGGCAAGCAAAAGACGGCATACGAGATCCCACAACACACCAACCACATTCGCCGTCTTCGT	CLL-H-030370	CCT3	Homo sapiens chaperonin containing TCP1, subunit 3 (gamma) (CCT3), transcript variant 1, mRNA.	CCTG; TRIC5; TCP-1-gamma; PIG48; CCT-gamma	7203	NM_001008800.1	63162571	NP_005989.3	1	1q22d	34.6477	30.8163	32.732	2.70923	8.27701	34.3581	135.55	84.9541	71.5535	84.2261	1.04968	4.14121	2.59544	2.18604	0.410752	0		1.83281
2498	CATGTGTGGTCATGTGTG	CAGCCAACCTCTCGTTGACAT	TAGAAGACGCACCGGCAGCCAACCTCTTGTTGATATGTTAATATTCATAGCATGTCAACGAGAGGTTGGCTGTTTTTTGGCAAGCAAAAGACGGCATACGAGATCCCACACATGACCACACATGTTCGCCGTCTTCGT	CLL-H-029972	C8ORF17	Homo sapiens chromosome 8 open reading frame 17 (C8orf17), mRNA.	MOST-1	56988	NM_020237.1	9910447	NP_064622.1	8	8q24.3b	3.9605	7.07072	5.51561	2.19926	39.8734	25.0558	3.57386	14.3148	15.19	106.114	4.54271	0.647954	2.59533	2.75401	0.502639	0		1.83268
12038	ACCAGTGTTGCAACTGTG	GACGTTTGTGACAACTGGCTT	TAGAAGACGCACCGGGACGTTTGTGATAACTGGTTTGTTAATATTCATAGCAAGCCAGTTGTCACAAACGTCTTTTTTGGCAAGCAAAAGACGGCATACGAGATCCCACAGTTGCAACACTGGTTTCGCCGTCTTCGT	CLL-H-039512	MICALL2	Homo sapiens MICAL-like 2 (MICALL2), transcript variant 1, mRNA.	JRAB; MICAL-L2; FLJ23471; FLJ44858; MGC46023	79778	NM_182924.3	142387938	NP_891554.1		7p22.3b	30.1404	6.58273	18.3615	16.6578	90.7209	29.6466	65.6601	47.6534	25.4655	53.4389	1.6146	3.57596	2.59528	1.38689	0.306492	0		1.83262
1662	GTTGGTGTTGCACAACAC	GCAGGATATAACAGCAGCAAA	TAGAAGACGCACCGGGCAGGATATAACAGCAGTAAAGTTAATATTCATAGCTTTGCTGCTGTTATATCCTGCTTTTTTGGCAAGCAAAAGACGGCATACGAGATCCGTGTTGTGCAACACCAACTTCGCCGTCTTCGT	CLL-H-029136	BFSP1	Homo sapiens beaded filament structural protein 1, filensin (BFSP1), mRNA.	FILENSIN; CP94; CP115; LIFL-H	631	NM_001161705.1	13518027	NP_001186.1	20	20p12.1a	3.26366	26.3309	14.7973	16.311	110.23	42.3194	34.4364	38.3779	5.57414	14.5243	2.85995	2.32721	2.59358	0.3767	0.192693	0		1.83055
21351	TGGTGTGTCACATGACGT	GCTTGGATATTGCTCCCAGAT	TAGAAGACGCACCGGGCTTGGATATTGTTCCTAGATGTTAATATTCATAGCATCTGGGAGCAATATCCAAGCTTTTTTGGCAAGCAAAAGACGGCATACGAGATCCACGTCATGTGACACACCATTCGCCGTCTTCGT	CLL-H-048825	SLC17A1	Homo sapiens solute carrier family 17 (sodium phosphate), member 1 (SLC17A1), mRNA.	MGC126796; NPT-1; NPT1; NAPI-1; MGC126794	6568	NM_005074.3	142378869	NP_005065.1		6p22.2a	20.5522	35.0525	27.8024	10.2532	36.879	52.4795	91.7322	72.1058	27.7559	38.4932	1.88759	3.29944	2.59351	0.998327	0.168413	0		1.83047
862	CAGTTGCAGTGTGTACAC	CCAGAGTATAAACCACCAAAT	TAGAAGACGCACCGGCCAGAGTATAAACCACTAAATGTTAATATTCATAGCATTTGGTGGTTTATACTCTGGTTTTTTGGCAAGCAAAAGACGGCATACGAGATCCGTGTACACACTGCAACTGTTCGCCGTCTTCGT	CLL-H-028336	ANXA7	Homo sapiens annexin A7 (ANXA7), transcript variant 2, mRNA.	ANX7; SNX	310	NM_001156.3	4809278	NP_004025.1	10	10q22.2a	11.0171	20.5788	15.7979	6.76118	42.7978	43.2859	38.5996	40.9427	3.31374	8.0936	2.73997	2.44333	2.59165	0.209758	0.0420283	0		1.82821
24655	CAGTCACAACGTTGTGCA	CCGCTACACCCTGCACTATAA	TAGAAGACGCACCGGCCGCTACACTCTGCATTATAAGTTAATATTCATAGCTTATAGTGCAGGGTGTAGCGGTTTTTTGGCAAGCAAAAGACGGCATACGAGATCCTGCACAACGTTGTGACTGTTCGCCGTCTTCGT	CLL-H-052129	TRAP1	Homo sapiens TNF receptor-associated protein 1 (TRAP1), mRNA.	HSP75; HSP90L	10131	NM_016292.2	7706484	NP_057376.1	16	16p13.3c	7.82397	9.23035	8.52716	0.994466	11.6623	28.7163	15.4645	22.0904	9.37043	42.4185	3.36763	1.81356	2.5906	1.09889	0.178747	0		1.82693
14606	CATGCAGTACTGGTTGCA	GCACCTACCTCAACACCCTTA	TAGAAGACGCACCGGGCACCTACCTTAACACCTTTAGTTAATATTCATAGCTAAGGGTGTTGAGGTAGGTGCTTTTTTGGCAAGCAAAAGACGGCATACGAGATCCTGCAACCAGTACTGCATGTTCGCCGTCTTCGT	CLL-H-042080	OR1Q1	Homo sapiens olfactory receptor, family 1, subfamily Q, member 1 (OR1Q1), mRNA.	TPCR106; OST226OR9-A; HSTPCR106; OR1Q3; OR1Q2; OR9-A; OR9-25; OST226	158131	NM_012364.1	50052933	NP_036496.1	9	9q33.2b	4.17219	10.9124	7.54228	4.76603	63.1908	31.9299	7.12871	19.5293	17.5371	89.7988	4.23345	0.945166	2.58931	2.32517	0.449391	0		1.82537
13542	TGACGTGTACCAGTCACA	GTGACTGGGATGCAAGAGAAT	TAGAAGACGCACCGGGTGATTGGGATGTAAGAGAATGTTAATATTCATAGCATTCTCTTGCATCCCAGTCACTTTTTTGGCAAGCAAAAGACGGCATACGAGATCCTGTGACTGGTACACGTCATTCGCCGTCTTCGT	CLL-H-041016	NLRP11	Homo sapiens NLR family, pyrin domain containing 11 (NLRP11), mRNA.	PAN10; FLJ26273; PYPAF6; CLR19.6; PYPAF7; NOD17; NALP11	204801	NM_145007.3	142354554	NP_659444.1	19	19q13.42c	31.1371	31.7819	31.4595	0.45595	1.44932	127.297	35.5675	81.432	64.8623	79.652	4.04636	1.13058	2.58847	2.06177	0.389697	0		1.82435
15908	ACGTGTGTTGACACACGT	CCTGATGATGGTAAACTGATA	TAGAAGACGCACCGGCCTGATGATGGTAAATTGATAGTTAATATTCATAGCTATCAGTTTACCATCATCAGGTTTTTTGGCAAGCAAAAGACGGCATACGAGATCCACGTGTGTCAACACACGTTTCGCCGTCTTCGT	CLL-H-043382	OXSR1	Homo sapiens oxidative-stress responsive 1 (OXSR1), mRNA.	OSR1; KIAA1101	9943	NM_005109.2	75709206	NP_005100.1	3	3p22.2a	21.7342	6.20894	13.9716	10.978	78.574	28.7163	43.5326	36.1245	10.4767	29.0017	2.05534	3.1158	2.58557	0.749859	0.175	0		1.82083
10235	GTCAGTACACACACACAC	CAGCTACTATCGTCATTGAAA	TAGAAGACGCACCGGCAGCTACTATCGTTATTGAAAGTTAATATTCATAGCTTTCAATGACGATAGTAGCTGTTTTTTGGCAAGCAAAAGACGGCATACGAGATCCGTGTGTGTGTGTACTGACTTCGCCGTCTTCGT	CLL-H-037709	KIN	Homo sapiens KIN, antigenic determinant of recA protein homolog (mouse) (KIN), mRNA.	KIN17; BTCD	22944	NM_012311.2	40068516	NP_036443.1	10	10p14d	4.22512	14.2868	9.25596	7.11468	76.866	26.6626	21.158	23.9103	3.89232	16.2788	2.88058	2.28588	2.58323	0.42052	0.125046	0		1.81799
8770	ACCAACTGGTACTGACAC	GACCAGGCACAGAAAGCTGAA	TAGAAGACGCACCGGGACCAGGCATAGAAAGTTGAAGTTAATATTCATAGCTTCAGCTTTCTGTGCCTGGTCTTTTTTGGCAAGCAAAAGACGGCATACGAGATCCGTGTCAGTACCAGTTGGTTTCGCCGTCTTCGT	CLL-H-036244	HMGN2	Homo sapiens high-mobility group nucleosomal binding domain 2 (HMGN2), mRNA.	HMG17; MGC5629; MGC88718	3151	NM_005517.3	148922918	NP_005508.1	1	1p36.11b	18.2236	26.0402	22.1319	5.52718	24.9738	61.7818	52.4673	57.1245	6.58635	11.5298	2.79153	2.37067	2.5811	0.297595	0.0288864	0		1.8154
4858	CATGTGCAACGTTGTGAC	GAAGTGGAAGTATCAACATTA	TAGAAGACGCACCGGGAAGTGGAAGTATCAACATTAGTTAATATTCATAGCTAATGTTGATACTTCCACTTCTTTTTTGGCAAGCAAAAGACGGCATACGAGATCCGTCACAACGTTGCACATGTTCGCCGTCTTCGT	CLL-H-032332	DFNB59	Homo sapiens deafness, autosomal recessive 59 (DFNB59), mRNA.	PJVK	494513	NM_001042702.3	148747415	NP_001036167.1	2	2q31.2b	11.661	23.133	17.397	8.11194	46.6284	54.4004	35.3109	44.8556	13.4983	30.0928	3.127	2.02971	2.57836	0.775899	0.132542	0		1.81208
20841	GTACTGTGGTTGTGTGCA	TCGAGTACGTGGGCCAGAATA	TAGAAGACGCACCGGTCGAGTATGTGGGCTAGAATAGTTAATATTCATAGCTATTCTGGCCCACGTACTCGATTTTTTGGCAAGCAAAAGACGGCATACGAGATCCTGCACACAACCACAGTACTTCGCCGTCTTCGT	CLL-H-048315	SETD1B	PREDICTED: Homo sapiens SET domain containing 1B (SETD1B), mRNA.		23067	NM_015048.1	113423508	XP_037523.11	12	12q24.31b	12.6136	13.4562	13.0349	0.595783	4.57068	42.5127	24.6653	33.589	12.62	37.5719	3.26146	1.89225	2.57686	0.968172	0.148071	0		1.81025
7854	TGTGACGTGTGTACACAC	GCTGACGTTAAGCACACATTT	TAGAAGACGCACCGGGCTGACGTTAAGCACATATTTGTTAATATTCATAGCAAATGTGTGCTTAACGTCAGCTTTTTTGGCAAGCAAAAGACGGCATACGAGATCCGTGTGTACACACGTCACATTCGCCGTCTTCGT	CLL-H-035328	GPR112	Homo sapiens G protein-coupled receptor 112 (GPR112), mRNA.	RP1-299I16; DKFZp781E1948; PGR17	139378	NM_153834.3	59710092	NP_722576.3	X	Xq26.3b	5.68936	8.10901	6.89918	1.71095	24.7993	20.5496	14.9608	17.7552	3.95192	22.2578	2.97856	2.16849	2.57352	0.572809	0.0704636	0		1.80621
10054	GTCAGTTGGTGTTGTGGT	CCTTGCGTCCTTGGGATATTA	TAGAAGACGCACCGGCCTTGTGTCTTTGGGATATTAGTTAATATTCATAGCTAATATCCCAAGGACGCAAGGTTTTTTGGCAAGCAAAAGACGGCATACGAGATCCACCACAACACCAACTGACTTCGCCGTCTTCGT	CLL-H-037528	KIAA1109	PREDICTED: Homo sapiens KIAA1109, transcript variant 14 (KIAA1109), mRNA.		84162	NM_015312.3	88981059	XP_948163.1		4q27d	23.6395	5.34717	14.4933	12.9346	89.2454	19.7644	54.7675	37.2659	24.7509	66.4171	1.36369	3.77881	2.57125	1.70775	0.368038	0		1.80345
1573	GTCAGTGTGTGTCAACCA	GCAGGAGAATGTGTGACATTT	TAGAAGACGCACCGGGCAGGAGAATGTGTGATATTTGTTAATATTCATAGCAAATGTCACACATTCTCCTGCTTTTTTGGCAAGCAAAAGACGGCATACGAGATCCTGGTTGACACACACTGACTTCGCCGTCTTCGT	CLL-H-029047	BBS7	Homo sapiens Bardet-Biedl syndrome 7 (BBS7), transcript variant 1, mRNA.	FLJ10715; BBS2L1	55212	NM_018190.2	29029556	NP_789794.1	4	4q27c	42.1983	46.9409	44.5696	3.35353	7.52426	126.922	102.216	114.569	17.4697	15.2482	2.84773	2.29341	2.57057	0.391965	0.0308056	0		1.80262
752	ACACTGTGTGTGACTGCA	CCAGTTCACTCTGATGTCTTA	TAGAAGACGCACCGGCCAGTTCACTTTGATGTCTTAGTTAATATTCATAGCTAAGACATCAGAGTGAACTGGTTTTTTGGCAAGCAAAAGACGGCATACGAGATCCTGCAGTCACACACAGTGTTTCGCCGTCTTCGT	CLL-H-028226	ANGEL1	Homo sapiens angel homolog 1 (Drosophila) (ANGEL1), mRNA.	KIAA0759	23357	NM_015305.3	34222097	NP_056120.1	14	14q24.3c	46.9526	51.364	49.1583	3.11929	6.3454	117.475	135.217	126.346	12.5459	9.92976	2.38973	2.75065	2.57019	0.255214	0.0137373	0		1.80216
1775	CACATGCAACTGCACAGT	GAGGTTGGACTTGTATTAGGT	TAGAAGACGCACCGGGAGGTTGGATTTGTATTAGGTGTTAATATTCATAGCACCTAATACAAGTCCAACCTCTTTTTTGGCAAGCAAAAGACGGCATACGAGATCCACTGTGCAGTTGCATGTGTTCGCCGTCTTCGT	CLL-H-029249	BRD7	Homo sapiens bromodomain containing 7 (BRD7), mRNA.	CELTIX1; NAG4; BP75	29117	NM_001173984.1	41350211	NP_037395.2	16	16q12.1c	13.0635	16.9967	15.0301	2.78123	18.5044	46.2095	31.0051	38.6073	10.7511	27.8473	3.07446	2.06287	2.56867	0.715306	0.0953273	0		1.80032
21295	CAACACGTCAGTTGACGT	CCCATATTTATGTGACTAGAA	TAGAAGACGCACCGGCCCATATTTATGTGACTAGAAGTTAATATTCATAGCTTCTAGTCACATAAATATGGGTTTTTTGGCAAGCAAAAGACGGCATACGAGATCCACGTCAACTGACGTGTTGTTCGCCGTCTTCGT	CLL-H-048769	SLC12A5	Homo sapiens solute carrier family 12, (potassium-chloride transporter) member 5 (SLC12A5), mRNA.	KIAA1176; KCC2	57468	NM_001134771.1	38570143	NP_065759.1	20	20q13.12b	0.202876	6.95651	3.57969	4.77554	133.406	8.35999	10.0182	9.1891	1.17254	12.7601	2.33539	2.79862	2.56701	0.327553	0.248031	0		1.7983
7282	ACCAGTGTACCATGTGCA	ACTTCCTGGATGGCACATTAA	TAGAAGACGCACCGGACTTCCTGGATGGCATATTAAGTTAATATTCATAGCTTAATGTGCCATCCAGGAAGTTTTTTTGGCAAGCAAAAGACGGCATACGAGATCCTGCACATGGTACACTGGTTTCGCCGTCTTCGT	CLL-H-034756	GALM	Homo sapiens galactose mutarotase (aldose 1-epimerase) (GALM), mRNA.	BLOCK 25	130589	NM_138801.2	20270354	NP_620156.1	2	2p22.1c	63.659	50.0246	56.8418	9.64102	16.9611	226.71	65.0994	145.905	114.276	78.3224	3.98845	1.14527	2.56686	2.01043	0.386635	0		1.79812
510	TGGTGTGTACGTACTGCA	GTCAATCTCCATGACAACTTT	TAGAAGACGCACCGGGTCAATCTCCATGATAACTTTGTTAATATTCATAGCAAAGTTGTCATGGAGATTGACTTTTTTGGCAAGCAAAAGACGGCATACGAGATCCTGCAGTACGTACACACCATTCGCCGTCTTCGT	CLL-H-027984	AGFG2	Homo sapiens ArfGAP with FG repeats 2 (AGFG2), mRNA.	RABR	3268	NM_006076.4	91984780	NP_006067.3	7	7q22.1c	7.88571	14.8786	11.3822	4.94474	43.4428	35.2521	23.154	29.2031	8.55462	29.2936	3.09713	2.03424	2.56569	0.751581	0.125434	0		1.7967
17434	CATGGTACGTTGCACAAC	CCACGATATTTGCTGAAGTTT	TAGAAGACGCACCGGCCACGATATTTGTTGAAGTTTGTTAATATTCATAGCAAACTTCAGCAAATATCGTGGTTTTTTGGCAAGCAAAAGACGGCATACGAGATCCGTTGTGCAACGTACCATGTTCGCCGTCTTCGT	CLL-H-044908	POLR2B	Homo sapiens polymerase (RNA) II (DNA directed) polypeptide B, 140kDa (POLR2B), mRNA.	RPB2; hsRPB2; hRPB140; POL2RB	5431	NM_000938.1	4505940	NP_000929.1	4	4q12e	16.777	18.876	17.8265	1.48424	8.32605	11.5494	79.9081	45.7287	48.3369	105.704	0.647875	4.48254	2.56521	2.71152	0.500246	0		1.79612
9097	CACAGTCAACGTTGACGT	GCTGCTCTTTCTTCTTGGTTA	TAGAAGACGCACCGGGCTGTTCTTTCTTCTTGGTTAGTTAATATTCATAGCTAACCAAGAAGAAAGAGCAGCTTTTTTGGCAAGCAAAAGACGGCATACGAGATCCACGTCAACGTTGACTGTGTTCGCCGTCTTCGT	CLL-H-036571	ICMT	Homo sapiens isoprenylcysteine carboxyl methyltransferase (ICMT), mRNA.	MST098; PCMT; PCCMT; PPMT; HSTE14; MSTP098; MGC39955	23463	NM_012405.3	89142738	NP_036537.1	1	1p36.31a	10.6113	8.78389	9.6976	1.29218	13.3247	35.0951	14.6471	24.8711	14.4589	58.1353	3.61894	1.51039	2.56466	1.49097	0.277423	0		1.79546
10511	CACAGTACTGGTCAACCA	GCACAGCAGCAGAGAATGAAT	TAGAAGACGCACCGGGCACAGTAGTAGAGAATGAATGTTAATATTCATAGCATTCATTCTCTGCTGCTGTGCTTTTTTGGCAAGCAAAAGACGGCATACGAGATCCTGGTTGACCAGTACTGTGTTCGCCGTCTTCGT	CLL-H-037985	KRT6B	Homo sapiens keratin 6B (KRT6B), mRNA.	PC2; K6B; CK6B; KRTL1	3854	NM_005555.3	119703752	NP_005546.2	12	12q13.13d	2.99022	12.9059	7.94805	7.01143	88.2157	20.151	20.5972	20.3741	0.315546	1.54876	2.53533	2.59148	2.56341	0.039701	0.129291	0		1.79393
6251	CAGTGTGTACTGACTGCA	GCCAAGGATCTAGCCAAGAAA	TAGAAGACGCACCGGGCCAAGGATTTAGCTAAGAAAGTTAATATTCATAGCTTTCTTGGCTAGATCCTTGGCTTTTTTGGCAAGCAAAAGACGGCATACGAGATCCTGCAGTCAGTACACACTGTTCGCCGTCTTCGT	CLL-H-033725	FAM161B	Homo sapiens family with sequence similarity 161, member B (FAM161B), mRNA.	c14_5547; FLJ31697	145483	NM_152445.1	22748942	NP_689658.1	14	14q24.3a	12.2784	6.37507	9.32675	4.1743	44.7562	14.7266	33.0487	23.8877	12.9556	54.2357	1.57897	3.54343	2.5612	1.38909	0.269479	0		1.79125
19485	CAGTTGGTTGTGTGTGAC	GTGCAACTGAAATGTGGATAT	TAGAAGACGCACCGGGTGCAATTGAAATGTGGATATGTTAATATTCATAGCATATCCACATTTCAGTTGCACTTTTTTGGCAAGCAAAAGACGGCATACGAGATCCGTCACACACAACCAACTGTTCGCCGTCTTCGT	CLL-H-046959	RFPL4A	PREDICTED: Homo sapiens ret finger protein-like 4A (RFPL4A), mRNA.		342931	NM_001145014.1	169214105	XP_001719286.1		19q13.42c	14.9423	23.6625	19.3024	6.16614	31.9449	46.3182	52.5148	49.4165	4.38165	8.86678	2.39961	2.72064	2.56012	0.227	0.0301299	0		1.78995
1492	GTGTGTGTTGGTACACCA	GCTACCTGTATCTGTCACTTA	TAGAAGACGCACCGGGCTACCTGTATCTGTCATTTAGTTAATATTCATAGCTAAGTGACAGATACAGGTAGCTTTTTTGGCAAGCAAAAGACGGCATACGAGATCCTGGTGTACCAACACACACTTCGCCGTCTTCGT	CLL-H-028966	BAI2	Homo sapiens brain-specific angiogenesis inhibitor 2 (BAI2), mRNA.		576	NM_001703.2	115387098	NP_001694.2	1	1p35.2a	6.99482	12.0233	9.50908	3.5557	37.3927	20.9121	27.7544	24.3332	4.83829	19.8834	2.19917	2.91873	2.55895	0.508807	0.0731419	0		1.78852
1426	TGGTGTCACATGTGTGAC	ATTACAACAACAAGCATATTC	TAGAAGACGCACCGGATTACAACAACAAGCATATTCGTTAATATTCATAGCGAATATGCTTGTTGTTGTAATTTTTTTGGCAAGCAAAAGACGGCATACGAGATCCGTCACACATGTGACACCATTCGCCGTCTTCGT	CLL-H-028900	ATXN3L	Homo sapiens ataxin 3-like (ATXN3L), non-coding RNA.	MJDL	92552	NM_001135995.1	149363705		X	Xp22.2	10.7348	27.6288	19.1818	11.9458	62.277	47.2122	50.956	49.0841	2.64726	5.39332	2.4613	2.65648	2.55889	0.138009	0.0744842	0		1.78845
26211	GTCACATGTGACACACCA	GCCTCACGTTTGTCAGTATAA	TAGAAGACGCACCGGGCCTCACGTTTGTTAGTATAAGTTAATATTCATAGCTTATACTGACAAACGTGAGGCTTTTTTGGCAAGCAAAAGACGGCATACGAGATCCTGGTGTGTCACATGTGACTTCGCCGTCTTCGT	CLL-H-053685	WNK3	Homo sapiens WNK lysine deficient protein kinase 3 (WNK3), transcript variant 1, mRNA.	KIAA1566; PRKWNK3	65267	NM_001002838.2	50845417	NP_065973.2	X	Xp11.22a	26.7708	18.2738	22.5223	6.00831	26.6771	53.7359	61.5065	57.6212	5.49463	9.53579	2.38589	2.73091	2.5584	0.243964	0.0258659	0		1.78786
12031	GTGTGTACTGACGTACGT	CCCTGAGAATGTGAGTAAGAA	TAGAAGACGCACCGGCCCTGAGAATGTGGGTAAGGAGTTAATATTCATAGCTTCTTACTCACATTCTCAGGGTTTTTTGGCAAGCAAAAGACGGCATACGAGATCCACGTACGTCAGTACACACTTCGCCGTCTTCGT	CLL-H-039505	MICAL3	Homo sapiens microtubule associated monoxygenase, calponin and LIM domain containing 3 (MICAL3), mRNA.	KIAA0819	57553	NM_001122731.1	149363657	NP_056056.1	22	22q11.21a	10.6113	6.14665	8.37898	3.15699	37.6775	22.9779	19.8843	21.4311	2.18747	10.207	2.74233	2.37312	2.55772	0.261067	0.0406728	0		1.78704
7787	GTACTGGTACGTCAACGT	GCTCTGGTGATGGAATGATAA	TAGAAGACGCACCGGGCTCTGGTGATGGAGTGATGAGTTAATATTCATAGCTTATCATTCCATCACCAGAGCTTTTTTGGCAAGCAAAAGACGGCATACGAGATCCACGTTGACGTACCAGTACTTCGCCGTCTTCGT	CLL-H-035261	GPC3	Homo sapiens glypican 3 (GPC3), mRNA.	OCI-5; SGBS; DGSX; SDYS; SGBS1; SGB	2719	NM_001164617.1	5360213	NP_004475.1	X	Xq26.2b	20.7728	23.1122	21.9425	1.65425	7.53902	47.478	64.7382	56.1081	12.2048	21.7523	2.16375	2.95036	2.55705	0.556217	0.0592599	0		1.78622
12917	GTACGTACCAACACACCA	CCTATGATGCTTGGACTTGAA	TAGAAGACGCACCGGCCTATGATGCTTGGATTTGAAGTTAATATTCATAGCTTCAAGTCCAAGCATCATAGGTTTTTTGGCAAGCAAAAGACGGCATACGAGATCCTGGTGTGTTGGTACGTACTTCGCCGTCTTCGT	CLL-H-040391	MYO3B	Homo sapiens myosin IIIB (MYO3B), transcript variant 1, mRNA.		140469	NM_001083615.2	134288914	NP_001077084.1	2	2q31.1b	40.4694	51.1148	45.7921	7.52741	16.4382	166.294	67.8273	117.061	69.6263	59.4789	3.6315	1.4812	2.55635	1.52049	0.286733	0		1.78537
20476	TGACACGTTGGTCAACGT	GCCCAGAGAAAGCATCATTAA	TAGAAGACGCACCGGGCCCAGAGAAAGCATTATTAAGTTAATATTCATAGCTTAATGATGCTTTCTCTGGGCTTTTTTGGCAAGCAAAAGACGGCATACGAGATCCACGTTGACCAACGTGTCATTCGCCGTCTTCGT	CLL-H-047950	SCGB1A1	Homo sapiens secretoglobin, family 1A, member 1 (uteroglobin) (SCGB1A1), mRNA.	UGB; CCSP; CC10; CC16	7356	NM_003357.3	39725696	NP_003348.1	11	11q12.3a	13.381	6.83192	10.1065	4.63091	45.8213	24.4155	27.2222	25.8188	1.98459	7.68659	2.41583	2.69354	2.55469	0.196368	0.047757	0		1.78335
25385	GTTGTGCAACCACAACTG	GCCACTACCTAAGAGTATTTA	TAGAAGACGCACCGGGCCACTACTTAAGAGTATTTAGTTAATATTCATAGCTAAATACTCTTAGGTAGTGGCTTTTTTGGCAAGCAAAAGACGGCATACGAGATCCCAGTTGTGGTTGCACAACTTCGCCGTCTTCGT	CLL-H-052859	TUBGCP3	Homo sapiens tubulin, gamma complex associated protein 3 (TUBGCP3), mRNA.	SPBC98; Spc98p; GCP3	10426	NM_006322.4	34222302	NP_006313.1	13	13q34c	34.3125	34.4814	34.397	0.119429	0.347207	126.427	49.093	87.7599	54.6832	62.31	3.67552	1.42725	2.55138	1.58977	0.301587	0		1.77934
11447	GTACACTGTGCACAACCA	CGCCTCTTCCACTTTGTACTT	TAGAAGACGCACCGGCGCCTCTTCTACTTTGTATTTGTTAATATTCATAGCAAGTACAAAGTGGAAGAGGCGTTTTTTGGCAAGCAAAAGACGGCATACGAGATCCTGGTTGTGCACAGTGTACTTCGCCGTCTTCGT	CLL-H-038921	MAGEC2	Homo sapiens melanoma antigen family C, 2 (MAGEC2), mRNA.	HCA587; CT10; MAGEE1; MGC13377	51438	NM_016249.3	29337297	NP_057333.1	X	Xq27.2a	10.2849	21.6067	15.9458	8.0057	50.2056	42.8631	38.4855	40.6743	3.09541	7.61022	2.68804	2.41352	2.55078	0.19412	0.0552909	0		1.77861
15377	CACACAACGTGTGTTGAC	CCTCTTGGGATTAACAGATGA	TAGAAGACGCACCGGCCTCTTGGGATTAATAGATGAGTTAATATTCATAGCTCATCTGTTAATCCCAAGAGGTTTTTTGGCAAGCAAAAGACGGCATACGAGATCCGTCAACACACGTTGTGTGTTCGCCGTCTTCGT	CLL-H-042851	OR5B21	Homo sapiens olfactory receptor, family 5, subfamily B, member 21 (OR5B21), mRNA.		219968	NM_001005218.1	57634529	NP_001005218.1	11	11q12.1b	3.60767	12.4698	8.03874	6.26647	77.9535	13.0957	27.8685	20.4821	10.4459	51.0003	1.62908	3.46678	2.54793	1.29945	0.285411	0		1.77514
15330	TGTGCAGTCATGGTTGAC	CCTGCATCCTCTGGTTCATGT	TAGAAGACGCACCGGCCTGCATCCTTTGGTTTATGTGTTAATATTCATAGCACATGAACCAGAGGATGCAGGTTTTTTGGCAAGCAAAAGACGGCATACGAGATCCGTCAACCATGACTGCACATTCGCCGTCTTCGT	CLL-H-042804	OR5AC2	Homo sapiens olfactory receptor, family 5, subfamily AC, member 2 (OR5AC2), mRNA.	HSA1	81050	NM_054106.1	52546682	NP_473447.1	3	3q11.2c	30.2197	22.6761	26.4479	5.33413	20.1684	72.4492	62.3239	67.3866	7.15968	10.6248	2.73931	2.35647	2.54789	0.270709	0.0229654	0		1.77511
14875	ACTGTGGTACGTGTTGAC	CTCCACCTGTGCTTCTCACAT	TAGAAGACGCACCGGCTCCACCTGTGTTTCTCATATGTTAATATTCATAGCATGTGAGAAGCACAGGTGGAGTTTTTTGGCAAGCAAAAGACGGCATACGAGATCCGTCAACACGTACCACAGTTTCGCCGTCTTCGT	CLL-H-042349	OR4B1	Homo sapiens olfactory receptor, family 4, subfamily B, member 1 (OR4B1), mRNA.	OR11-106; OST208	119765	NM_001005470.1	53793678	NP_001005470.1	11	11p11.2a	25.1478	21.4821	23.315	2.59205	11.1175	103.992	14.7897	59.3911	63.0759	106.204	4.46033	0.634343	2.54734	2.70538	0.503837	0		1.77443
9215	GTCAACACACCAGTACCA	CTCACGCGAGACCTCAAATAT	TAGAAGACGCACCGGCTCACGTGAGACCTTAAATATGTTAATATTCATAGCATATTTGAGGTCTCGCGTGAGTTTTTTGGCAAGCAAAAGACGGCATACGAGATCCTGGTACTGGTGTGTTGACTTCGCCGTCTTCGT	CLL-H-036689	IL29	Homo sapiens interleukin 29 (interferon, lambda 1) (IL29), mRNA.	IL-29; IFNL1	282618	NM_172140.1	26024324	NP_742152.1	19	19q13.2a	16.8917	37.4821	27.1869	14.5596	53.5539	15.2824	123.165	69.2237	76.2846	110.2	0.562123	4.53031	2.54622	2.80593	0.523978	0		1.77307
18334	GTTGTGACCAACTGTGCA	GCAGTCAATCAACAGTCTCAA	TAGAAGACGCACCGGGCAGTCAATCAACAGTTTCAAGTTAATATTCATAGCTTGAGACTGTTGATTGACTGCTTTTTTGGCAAGCAAAAGACGGCATACGAGATCCTGCACAGTTGGTCACAACTTCGCCGTCTTCGT	CLL-H-045808	PTCHD1	Homo sapiens patched domain containing 1 (PTCHD1), mRNA.	MGC149798; FLJ30296	139411	NM_173495.2	148271103	NP_775766.2	X	Xp22.11b	23.172	16.1349	19.6535	4.97594	25.3184	47.3693	52.7049	50.0371	3.77287	7.54016	2.41022	2.68171	2.54597	0.19197	0.0204737	0		1.77277
24287	GTGTGTTGGTTGGTACAC	GCATTACACCACTCAGTATAT	TAGAAGACGCACCGGGCATTACACCACTTAGTATATGTTAATATTCATAGCATATACTGAGTGGTGTAATGCTTTTTTGGCAAGCAAAAGACGGCATACGAGATCCGTGTACCAACCAACACACTTCGCCGTCTTCGT	CLL-H-051761	TMPRSS3	Homo sapiens transmembrane protease, serine 3 (TMPRSS3), transcript variant C, mRNA.	ECHOS1; DFNB10; DFNB8; TADG12	64699	NM_024022.2	14602454	NP_115780.1	21	21q22.3b	14.4042	14.266	14.3351	0.0977061	0.681585	39.2509	33.714	36.4825	3.91515	10.7316	2.73809	2.35185	2.54497	0.273116	0.0152775	0		1.77156
10494	GTGTCAGTGTGTCAACTG	CGAGGTGAGAATGCCCTTAAA	TAGAAGACGCACCGGCGAGGTGAGGATGCCTTTAAAGTTAATATTCATAGCTTTAAGGGCATTCTCACCTCGTTTTTTGGCAAGCAAAAGACGGCATACGAGATCCCAGTTGACACACTGACACTTCGCCGTCTTCGT	CLL-H-037968	KRT4	Homo sapiens keratin 4 (KRT4), mRNA.	CK4; CYK4; K4; FLJ31692	3851	NM_002272.2	109255248	NP_002263.2	12	12q13.13d	24.4422	22.2193	23.3307	1.57181	6.73709	59.9455	58.7881	59.3668	0.818417	1.37858	2.56938	2.51977	2.54457	0.0350789	0.00120696	0		1.77108
19855	TGACGTCAACGTTGACGT	GCTCATTTCAGACGCTCTCAA	TAGAAGACGCACCGGGCTCATTTCAGATGCTCTTAAGTTAATATTCATAGCTTGAGAGCGTCTGAAATGAGCTTTTTTGGCAAGCAAAAGACGGCATACGAGATCCACGTCAACGTTGACGTCATTCGCCGTCTTCGT	CLL-H-047329	RNMTL1	Homo sapiens RNA methyltransferase like 1 (RNMTL1), mRNA.	FLJ10581; HC90	55178	NM_018146.2	21359921	NP_060616.1	17	17p13.3f	4.2163	10.3932	7.30477	4.36775	59.7932	34.3219	2.85148	18.5867	22.2529	119.725	4.69856	0.390359	2.54446	3.04636	0.554583	0		1.77094
14026	GTGTCAGTTGACGTACGT	GCACATCAATAGTCTAACATA	TAGAAGACGCACCGGGCACATCAATAGTCTAACATAGTTAATATTCATAGCTATGTTAGACTATTGATGTGCTTTTTTGGCAAGCAAAAGACGGCATACGAGATCCACGTACGTCAACTGACACTTCGCCGTCTTCGT	CLL-H-041500	NUP98	Homo sapiens nucleoporin 98kDa (NUP98), transcript variant 1, mRNA.	NUP196; ADIR2	4928	NM_005387.4	56550110	NP_057404.2	11	11p15.4d	14.7218	5.36793	10.0448	6.61415	65.8462	34.5393	16.5481	25.5437	12.7217	49.8037	3.43851	1.64742	2.54297	1.26649	0.265946	0		1.76913
12449	TGACGTCATGGTTGACCA	GCGTCAAAGACAGGGAGTCAT	TAGAAGACGCACCGGGCGTCAAAGATAGGGAGTTATGTTAATATTCATAGCATGACTCCCTGTCTTTGACGCTTTTTTGGCAAGCAAAAGACGGCATACGAGATCCTGGTCAACCATGACGTCATTCGCCGTCTTCGT	CLL-H-039923	MRAS	Homo sapiens muscle RAS oncogene homolog (MRAS), transcript variant 1, mRNA.	RRAS3; M-RAs; FLJ42964; R-RAS3	22808	NM_001085049.1	145386561	NP_036351.3	3	3q22.3c	40.8928	12.8955	26.8941	19.7971	73.6111	80.9059	55.8035	68.3547	17.75	25.9676	3.00831	2.07493	2.54162	0.659997	0.158231	0		1.76749
15140	ACCAGTACGTCAGTACTG	GCTCTCCTATATCCTGATCAT	TAGAAGACGCACCGGGCTCTCCTATATCCTGATTATGTTAATATTCATAGCATGATCAGGATATAGGAGAGCTTTTTTGGCAAGCAAAAGACGGCATACGAGATCCCAGTACTGACGTACTGGTTTCGCCGTCTTCGT	CLL-H-042614	OR51F2	Homo sapiens olfactory receptor, family 51, subfamily F, member 2 (OR51F2), mRNA.	OR11-23	119694	NM_001004753.1	52317268	NP_001004753.1	11	11p15.4c	7.7093	29.3731	18.5412	15.3186	82.6193	35.6508	58.579	47.1149	16.2127	34.411	1.92279	3.1594	2.54109	0.874414	0.211732	0		1.76685
11841	CAACGTTGGTTGTGTGTG	TGACCCGCTCAGTCTCAATAC	TAGAAGACGCACCGGTGACCCGCTCAGTTTCAATATGTTAATATTCATAGCGTATTGAGACTGAGCGGGTCATTTTTTGGCAAGCAAAAGACGGCATACGAGATCCCACACACAACCAACGTTGTTCGCCGTCTTCGT	CLL-H-039315	MEPCE	Homo sapiens methylphosphate capping enzyme (MEPCE), mRNA.	FLJ20257; BCDIN3	56257	NM_019606.4	47271405	NP_062552.2	7	7q22.1c	41.6161	32.7579	37.187	6.26369	16.8438	79.879	109.098	94.4884	20.6608	21.8659	2.14804	2.93376	2.5409	0.555591	0.0642162	0		1.76661
5089	TGTGACCAACGTGTACAC	GCTTGATGACAACAACACAAT	TAGAAGACGCACCGGGCTTGATGACAACAACATAATGTTAATATTCATAGCATTGTGTTGTTGTCATCAAGCTTTTTTGGCAAGCAAAAGACGGCATACGAGATCCGTGTACACGTTGGTCACATTCGCCGTCTTCGT	CLL-H-032563	DMP1	Homo sapiens dentin matrix acidic phosphoprotein (DMP1), mRNA.		1758	NM_001079911.2	4758171	NP_004398.1	4	4q22.1a	12.7195	17.4224	15.0709	3.3255	22.0656	42.6939	33.8756	38.2848	6.2355	16.2872	2.83287	2.24774	2.5403	0.413743	0.0433464	0		1.76589
2218	ACTGTGACACCAGTTGAC	CGCTAGTGAGGTGTTTGAGCT	TAGAAGACGCACCGGCGCTAGTGGGGTGTTTGAGTTGTTAATATTCATAGCAGCTCAAACACCTCACTAGCGTTTTTTGGCAAGCAAAAGACGGCATACGAGATCCGTCAACTGGTGTCACAGTTTCGCCGTCTTCGT	CLL-H-029692	C19ORF6	Homo sapiens chromosome 19 open reading frame 6 (C19orf6), transcript variant 1, mRNA.	R32184_3; ASBABP1; MGC4022	91304	NM_001033026.1	74229024	NP_001028198.1	19	19p13.3i	4.46328	4.60999	4.53663	0.103738	2.28668	15.9347	7.09069	11.5127	6.25368	54.3198	3.51246	1.56299	2.53772	1.37848	0.255437	0		1.76276
19506	CACAGTCAGTCAACACCA	CGAAGGAATCACATCACACAA	TAGAAGACGCACCGGCGAAGGAATCACATCATACAAGTTAATATTCATAGCTTGTGTGATGTGATTCCTTCGTTTTTTGGCAAGCAAAAGACGGCATACGAGATCCTGGTGTTGACTGACTGTGTTCGCCGTCTTCGT	CLL-H-046980	RFX2	Homo sapiens regulatory factor X, 2 (influences HLA class II expression) (RFX2), transcript variant 2, mRNA.	FLJ14226	5990	NM_000635.3	19743878	NP_602309.1	19	19p13.3b	28.041	24.0259	26.0335	2.83911	10.9056	47.2968	84.7271	66.0119	26.4672	40.0946	1.81677	3.25454	2.53566	1.01666	0.16763	0		1.76025
17848	GTGTACTGGTGTGTACCA	CGAATGGAAAGGAGGTAGAAA	TAGAAGACGCACCGGCGAATGGAAGGGAGGTAGGAAGTTAATATTCATAGCTTTCTACCTCCTTTCCATTCGTTTTTTGGCAAGCAAAAGACGGCATACGAGATCCTGGTACACACCAGTACACTTCGCCGTCTTCGT	CLL-H-045322	PPP2R3C	Homo sapiens protein phosphatase 2 (formerly 2A), regulatory subunit B'', gamma (PPP2R3C), mRNA.	G5pr; FLJ20644; G4-1; C14orf10	55012	NM_017917.2	31542241	NP_060387.2	14	14q13.2a	6.27152	8.9604	7.61596	1.90132	24.965	23.6907	14.9228	19.3067	6.19985	32.1124	3.11066	1.95941	2.53503	0.81406	0.125525	0		1.7595
16913	CAGTACACCATGTGTGTG	GAGGGCCTTGAGGACAAATAC	TAGAAGACGCACCGGGAGGGCCTTGAGGATAAATATGTTAATATTCATAGCGTATTTGTCCTCAAGGCCCTCTTTTTTGGCAAGCAAAAGACGGCATACGAGATCCCACACACATGGTGTACTGTTCGCCGTCTTCGT	CLL-H-044387	PIH1D1	Homo sapiens PIH1 domain containing 1 (PIH1D1), mRNA.	NOP17; FLJ20643	55011	NM_017916.2	8923597	NP_060386.1	19	19q13.33b	18.3471	15.0344	16.6907	2.34243	14.0344	51.8513	32.735	42.2932	13.5172	31.9608	3.10659	1.96127	2.53393	0.809865	0.118565	0		1.75816
26982	CAGTACACACTGTGACAC	CCAAAGAACCACCCTCAATAA	TAGAAGACGCACCGGCCAAAGAACCACCCTTAATAAGTTAATATTCATAGCTTATTGAGGGTGGTTCTTTGGTTTTTTGGCAAGCAAAAGACGGCATACGAGATCCGTGTCACAGTGTGTACTGTTCGCCGTCTTCGT	CLL-H-054456	ZNF416	Homo sapiens zinc finger protein 416 (ZNF416), mRNA.	FLJ20557	55659	NM_017879.1	33859677	NP_060349.1	19	19q13.43b	3.90757	8.61777	6.26267	3.33061	53.1819	24.2222	7.47089	15.8466	11.845	74.748	3.86772	1.19292	2.53032	1.89136	0.385506	0		1.75378
11579	TGTGTGGTTGACACACCA	TGATCTGGGTTCTAGGTATAT	TAGAAGACGCACCGGTGATTTGGGTTCTAGGTATATGTTAATATTCATAGCATATACCTAGAACCCAGATCATTTTTTGGCAAGCAAAAGACGGCATACGAGATCCTGGTGTGTCAACCACACATTCGCCGTCTTCGT	CLL-H-039053	MAPK6	Homo sapiens mitogen-activated protein kinase 6 (MAPK6), mRNA.	HsT17250; PRKM6; p97MAPK; ERK3; DKFZp686F03189	5597	NM_002748.3	16306569	NP_002739.1	15	15q21.2c	75.5052	30.131	52.8181	32.0844	60.7451	219.244	48	133.622	121.088	90.6198	4.15093	0.908778	2.52985	2.29255	0.457935	0		1.75321
17944	CAGTGTTGCACAACACGT	CACTTAAAGAAGCATCTCAAT	TAGAAGACGCACCGGCACTTAAAGAAGCATCTCAATGTTAATATTCATAGCATTGAGATGCTTCTTTAAGTGTTTTTTGGCAAGCAAAAGACGGCATACGAGATCCACGTGTTGTGCAACACTGTTCGCCGTCTTCGT	CLL-H-045418	PRDM4	Homo sapiens PR domain containing 4 (PRDM4), mRNA.	MGC45046; PFM1	11108	NM_012406.3	41349473	NP_036538.3	12	12q23.3d	19.1762	10.1856	14.6809	6.35734	43.3035	62.6154	11.6436	37.1295	36.0425	97.0725	4.26509	0.793109	2.5291	2.45506	0.47715	0		1.7523
11356	CAGTACCAACACTGTGAC	CTTCAAGAAGTCCCGAGATGT	TAGAAGACGCACCGGCTTCAAGGAGTCCTGAGATGTGTTAATATTCATAGCACATCTCGGGACTTCTTGAAGTTTTTTGGCAAGCAAAAGACGGCATACGAGATCCGTCACAGTGTTGGTACTGTTCGCCGTCTTCGT	CLL-H-038830	LZTR1	Homo sapiens leucine-zipper-like transcription regulator 1 (LZTR1), mRNA.	MGC21205; TCFL2; LZTR-1	8216	NM_006767.3	122939136	NP_006758.2	22	22q11.21e	3.40479	6.1778	4.79129	1.96081	40.9244	12.1896	12.0428	12.1162	0.103859	0.857187	2.54412	2.51347	2.5288	0.0216765	0.0341024	0		1.75193
26387	ACGTGTACACACCAACTG	CGACGAAATGGTGGAGTCAAT	TAGAAGACGCACCGGCGACGAAGTGGTGGAGTTAATGTTAATATTCATAGCATTGACTCCACCATTTCGTCGTTTTTTGGCAAGCAAAAGACGGCATACGAGATCCCAGTTGGTGTGTACACGTTTCGCCGTCTTCGT	CLL-H-053861	YWHAE	Homo sapiens tyrosine 3-monooxygenase/tryptophan 5-monooxygenase activation protein, epsilon polypeptide (YWHAE), mRNA.	KCIP-1; MDS; FLJ45465; MDCR; 14-3-3E	7531	NM_006761.4	34304385	NP_006752.1	17	17p13.3e	29.4435	28.3971	28.9203	0.739932	2.55852	48.5411	97.7013	73.1212	34.7615	47.5396	1.67844	3.37829	2.52837	1.20198	0.214028	0		1.75141
24807	CAGTTGACTGTGCAACGT	CCGCAATACCATCATCACTTT	TAGAAGACGCACCGGCCGCAATACCATCATTACTTTGTTAATATTCATAGCAAAGTGATGATGGTATTGCGGTTTTTTGGCAAGCAAAAGACGGCATACGAGATCCACGTTGCACAGTCAACTGTTCGCCGTCTTCGT	CLL-H-052281	TRIM42	Homo sapiens tripartite motif-containing 42 (TRIM42), mRNA.	MGC163346; FLJ40097	287015	NM_152616.3	29029527	NP_689829.2	3	3q23b	11.8903	6.29201	9.09116	3.9586	43.5434	43.153	2.80396	22.9785	28.5311	124.164	4.7467	0.308427	2.52756	3.13833	0.565714	0		1.75043
2332	CACAGTTGTGCAACTGTG	GAGACAGTTGACAATACTCTT	TAGAAGACGCACCGGGAGACAGTTGACAATATTCTTGTTAATATTCATAGCAAGAGTATTGTCAACTGTCTCTTTTTTGGCAAGCAAAAGACGGCATACGAGATCCCACAGTTGCACAACTGTGTTCGCCGTCTTCGT	CLL-H-029806	C20ORF70	Homo sapiens chromosome 20 open reading frame 70 (C20orf70), mRNA.	bA49G10.1; SPLUNC2	140683	NM_080574.2	46309852	NP_542141.1	20	20q11.21c	3.73116	7.01881	5.37498	2.32472	43.2507	12.2742	14.8942	13.5842	1.85265	13.6382	2.28358	2.77103	2.52731	0.34468	0.0597463	0		1.75012
12609	CACAACTGGTCAGTTGCA	CACCAAACCTACGTCAAGATT	TAGAAGACGCACCGGCACCAAACCTACGTTAAGATTGTTAATATTCATAGCAATCTTGACGTAGGTTTGGTGTTTTTTGGCAAGCAAAAGACGGCATACGAGATCCTGCAACTGACCAGTTGTGTTCGCCGTCTTCGT	CLL-H-040083	MST4	Homo sapiens serine/threonine protein kinase MST4 (MST4), transcript variant 2, mRNA.	MASK	51765	NM_001042452.1	109633027	NP_001035918.1	X	Xq26.2a	10.8759	8.74236	9.80915	1.50866	15.3802	12.4554	37.1168	24.7861	17.4382	70.3548	1.26978	3.7839	2.52684	1.77775	0.349858	0		1.74955
3022	ACACTGGTTGGTGTACTG	CGACCTTCAATATCCTGGTTA	TAGAAGACGCACCGGCGACCTTCAATATCTTGGTTAGTTAATATTCATAGCTAACCAGGATATTGAAGGTCGTTTTTTGGCAAGCAAAAGACGGCATACGAGATCCCAGTACACCAACCAGTGTTTCGCCGTCTTCGT	CLL-H-030496	CDH23	Homo sapiens cadherin-like 23 (CDH23), transcript variant 2, mRNA.	DKFZp434P2350; USH1H; KIAA1774; FLJ00233; MGC102761; FLJ36499; DFNB12; USH1D; KIAA1812	64072	NM_001171930.1	16507963	NP_443068.1	10	10q22.1d-q22.1e	43.6272	34.8137	39.2205	6.2321	15.8899	138.979	59.1493	99.064	56.448	56.9813	3.54353	1.50812	2.52583	1.43925	0.274635	0		1.74832
595	GTTGGTACGTCAGTACGT	GCTGGAGCACACCAGTGATAT	TAGAAGACGCACCGGGCTGGAGTACACTAGTGATATGTTAATATTCATAGCATATCACTGGTGTGCTCCAGCTTTTTTGGCAAGCAAAAGACGGCATACGAGATCCACGTACTGACGTACCAACTTCGCCGTCTTCGT	CLL-H-028069	AIPL1	Homo sapiens aryl hydrocarbon receptor interacting protein-like 1 (AIPL1), transcript variant 1, mRNA.	AIPL2; LCA4	23746	NM_001033054.1	74272275	NP_055151.3	17	17p13.2a	9.58811	15.7404	12.6643	4.35033	34.3512	39.6616	24.3136	31.9876	10.8527	33.9277	3.13178	1.91986	2.52582	0.856953	0.144429	0		1.74832
20207	ACGTTGGTTGACACACCA	GCAAGTTAGTAGAGGCCAATA	TAGAAGACGCACCGGGCAAGTTAGTAGAGGCTAATAGTTAATATTCATAGCTATTGGCCTCTACTAACTTGCTTTTTTGGCAAGCAAAAGACGGCATACGAGATCCTGGTGTGTCAACCAACGTTTCGCCGTCTTCGT	CLL-H-047681	RYK	Homo sapiens RYK receptor-like tyrosine kinase (RYK), transcript variant 1, mRNA.	JTK5; RYK1; D3S3195; JTK5A	6259	NM_001005861.2	54607019	NP_001005861.1	3	3q22.1e	17.712	27.3277	22.5198	6.79931	30.1926	59.3052	54.3968	56.851	3.47077	6.10503	2.63347	2.41551	2.52449	0.154121	0.0238417	0		1.7467
14832	GTGTACGTCAGTGTTGCA	CACCCAAACCCATTTCATCCT	TAGAAGACGCACCGGCACCCAAACCTATTTCATTCTGTTAATATTCATAGCAGGATGAAATGGGTTTGGGTGTTTTTTGGCAAGCAAAAGACGGCATACGAGATCCTGCAACACTGACGTACACTTCGCCGTCTTCGT	CLL-H-042306	OR2W3	Homo sapiens olfactory receptor, family 2, subfamily W, member 3 (OR2W3), mRNA.	OR2W8P; OR2W3P; OST718	343171	NM_001001957.2	68533231	NP_001001957.2	1	1q44e	35.1064	51.447	43.2767	11.5546	26.6992	191.99	26.4808	109.235	117.033	107.138	4.43633	0.611894	2.52411	2.70429	0.510823	0		1.74624
5536	GTTGACGTGTTGACACTG	CTGGAGAATGTCGGCTAGAAA	TAGAAGACGCACCGGCTGGAGAATGTTGGTTAGAAAGTTAATATTCATAGCTTTCTAGCCGACATTCTCCAGTTTTTTGGCAAGCAAAAGACGGCATACGAGATCCCAGTGTCAACACGTCAACTTCGCCGTCTTCGT	CLL-H-033010	EAF2	Homo sapiens ELL associated factor 2 (EAF2), mRNA.	TRAITS; BM040; U19	55840	NM_018456.4	41350199	NP_060926.2	3	3q13.33c	12.1461	37.2121	24.6791	17.7244	71.8192	56.2125	68.331	62.2718	8.56911	13.7608	2.27773	2.76878	2.52326	0.347221	0.114127	0		1.7452
3842	CATGTGACACTGGTACTG	CCCAGACATGAAGAATCTCAT	TAGAAGACGCACCGGCCCAGACATGAAGAATTTCATGTTAATATTCATAGCATGAGATTCTTCATGTCTGGGTTTTTTGGCAAGCAAAAGACGGCATACGAGATCCCAGTACCAGTGTCACATGTTCGCCGTCTTCGT	CLL-H-031316	COLQ	Homo sapiens collagen-like tail subunit (single strand of homotrimer) of asymmetric acetylcholinesterase (COLQ), transcript variant III, mRNA.	EAD	8292	NM_005677.3	116805305	NP_536800.1		3p24.3e	14.4042	12.2725	13.3384	1.50733	11.3007	34.3702	32.9346	33.6524	1.0151	3.01643	2.57679	2.46916	2.52298	0.0761038	0.00397758	0		1.74486
14306	CATGACCACAGTACACTG	TCCAACTGACTTTCTGTGGAT	TAGAAGACGCACCGGTCCAATTGACTTTCTGTGGATGTTAATATTCATAGCATCCACAGAAAGTCAGTTGGATTTTTTGGCAAGCAAAAGACGGCATACGAGATCCCAGTGTACTGTGGTCATGTTCGCCGTCTTCGT	CLL-H-041780	OR10H2	Homo sapiens olfactory receptor, family 10, subfamily H, member 2 (OR10H2), mRNA.	MGC138383	26538	NM_013939.2	7330336	NP_039227.1	19	19p13.12a	12.349	3.35366	7.85132	6.36066	81.0138	34.3581	5.25623	19.8072	20.5781	103.892	4.37609	0.669471	2.52278	2.62098	0.514671	0		1.74463
2203	ACGTACTGACTGTGTGAC	GTGAACACAGATGATGTCAAC	TAGAAGACGCACCGGGTGAACACAGATGATGTTAACGTTAATATTCATAGCGTTGACATCATCTGTGTTCACTTTTTTGGCAAGCAAAAGACGGCATACGAGATCCGTCACACAGTCAGTACGTTTCGCCGTCTTCGT	CLL-H-029677	C19ORF50	Homo sapiens chromosome 19 open reading frame 50 (C19orf50), mRNA.	MSTP096; FLJ25480; MST096; MGC2749	79036	NM_001171948.1	34147360	NP_076974.1	19	19p13.11c	17.8796	14.2037	16.0417	2.59921	16.2029	42.0657	38.8562	40.461	2.26948	5.60906	2.62228	2.42221	2.52224	0.141474	0.00983647	0		1.74397
14472	ACCATGACGTTGGTTGCA	CAGGCTTTGGTGCATTGTTTC	TAGAAGACGCACCGGCAGGCTTTGGTGTATTGTTTCGTTAATATTCATAGCGAAACAATGCACCAAAGCCTGTTTTTTGGCAAGCAAAAGACGGCATACGAGATCCTGCAACCAACGTCATGGTTTCGCCGTCTTCGT	CLL-H-041946	OR13H1	Homo sapiens olfactory receptor, family 13, subfamily H, member 1 (OR13H1), mRNA.	ORX1	347468	NM_001004486.1	52218867	NP_001004486.1	X	Xq26.2a	38.1584	17.5885	27.8735	14.5451	52.1825	53.893	86.6851	70.289	23.1875	32.9888	1.93349	3.10995	2.52172	0.831886	0.159767	0		1.74334
9682	TGCAGTTGGTCATGACGT	GTGCATTGTCTGGTTCACTTT	TAGAAGACGCACCGGGTGCATTGTCTGGTTTACTTTGTTAATATTCATAGCAAAGTGAACCAGACAATGCACTTTTTTGGCAAGCAAAAGACGGCATACGAGATCCACGTCATGACCAACTGCATTCGCCGTCTTCGT	CLL-H-037156	KCNA6	Homo sapiens potassium voltage-gated channel, shaker-related subfamily, member 6 (KCNA6), mRNA.	KV1.6; HBK2	3742	NM_002235.3	25952089	NP_002226.1	12	12p13.32a	32.9365	23.7871	28.3618	6.46961	22.811	19.5469	123.346	71.4463	73.3968	102.73	0.689198	4.349	2.5191	2.58787	0.495223	0		1.74016
13181	GTTGTGTGGTTGTGACTG	TCACAGATTGTTCCTCCCATT	TAGAAGACGCACCGGTCACAGATTGTTCCTCTCATTGTTAATATTCATAGCAATGGGAGGAACAATCTGTGATTTTTTGGCAAGCAAAAGACGGCATACGAGATCCCAGTCACAACCACACAACTTCGCCGTCTTCGT	CLL-H-040655	NDUFA9	Homo sapiens NADH dehydrogenase (ubiquinone) 1 alpha subcomplex, 9, 39kDa (NDUFA9), mRNA.	MGC111043; NDUFS2L	4704	NM_005002.3	39725687	NP_004993.1	12	12p13.32a	29.4259	9.58337	19.5046	14.0308	71.9356	47.8042	50.4142	49.1092	1.84558	3.75812	2.45091	2.58473	2.51782	0.0946228	0.0977818	0		1.73861
21302	CATGCATGACCATGACTG	GAAGGGAAGAACATGGCACTT	TAGAAGACGCACCGGGAAGGGAAGAATATGGCATTTGTTAATATTCATAGCAAGTGCCATGTTCTTCCCTTCTTTTTTGGCAAGCAAAAGACGGCATACGAGATCCCAGTCATGGTCATGCATGTTCGCCGTCTTCGT	CLL-H-048776	SLC12A7	Homo sapiens solute carrier family 12 (potassium/chloride transporters), member 7 (SLC12A7), mRNA.	KCC4; DKFZP434F076	10723	NM_006598.2	5730042	NP_006589.1	5	5p15.33d	21.2844	40.5969	30.9407	13.6561	44.1363	26.9284	128.659	77.7936	71.9344	92.4682	0.870323	4.15825	2.51429	2.32491	0.461006	0		1.73431
27337	GTCAGTCATGGTACTGAC	CCATTGTGAATCACTGGAGAA	TAGAAGACGCACCGGCCATTGTGAATCATTGGAGAAGTTAATATTCATAGCTTCTCCAGTGATTCACAATGGTTTTTTGGCAAGCAAAAGACGGCATACGAGATCCGTCAGTACCATGACTGACTTCGCCGTCTTCGT	CLL-H-054811	ZNF761	Homo sapiens zinc finger protein 761 (ZNF761), mRNA.	FLJ16231; ZNF468; KIAA2033; FLJ35333	388561	NM_001008401.3	121247448	NP_001008401.2	19	19q13.41b	26.0123	7.96365	16.988	12.7623	75.1256	54.6057	30.796	42.7009	16.836	39.4278	3.21438	1.81281	2.5136	0.991056	0.227349	0		1.73348
845	CAACTGGTTGACCAACAC	GCTGCACCACTGGAATGAAAT	TAGAAGACGCACCGGGCTGTACCATTGGAATGAAATGTTAATATTCATAGCATTTCATTCCAGTGGTGCAGCTTTTTTGGCAAGCAAAAGACGGCATACGAGATCCGTGTTGGTCAACCAGTTGTTCGCCGTCTTCGT	CLL-H-028319	ANTXR1	Homo sapiens anthrax toxin receptor 1 (ANTXR1), transcript variant 1, mRNA.	ATR; FLJ21776; FLJ11298; TEM8; FLJ10601	84168	NM_018153.3	14149903	NP_115584.1	2	2p14a	22.087	17.7858	19.9364	3.04143	15.2556	55.8621	44.2835	50.0728	8.18731	16.3508	2.80201	2.22124	2.51162	0.410671	0.0395233	0		1.73108
781	GTACTGGTGTGTCAACTG	GCCAATTTCAATACGAATCAT	TAGAAGACGCACCGGGCCAATTTCAATACGAATCATGTTAATATTCATAGCATGATTCGTATTGAAATTGGCTTTTTTGGCAAGCAAAAGACGGCATACGAGATCCCAGTTGACACACCAGTACTTCGCCGTCTTCGT	CLL-H-028255	ANK1	Homo sapiens ankyrin 1, erythrocytic (ANK1), transcript variant 4, mRNA.	SPH2; ANK; SPH1	286	NM_000037.3	70780352	NP_065208.2	8	8p11.21b	11.8286	16.6022	14.2154	3.37545	23.7451	47.4901	23.9049	35.6975	16.6772	46.7181	3.34075	1.68163	2.51119	1.17318	0.216109	0		1.73056
13838	GTGTACCAGTACTGTGAC	GCTGTTGTAAAGGAGAAACAA	TAGAAGACGCACCGGGCTGTTGTAAAGGAGAAATAAGTTAATATTCATAGCTTGTTTCTCCTTTACAACAGCTTTTTTGGCAAGCAAAAGACGGCATACGAGATCCGTCACAGTACTGGTACACTTCGCCGTCTTCGT	CLL-H-041312	NRXN1	Homo sapiens neurexin 1 (NRXN1), transcript variant alpha, mRNA.	FLJ35941; DKFZp313P2036; Hs.22998; KIAA0578	9378	NM_001135659.1	154330995	NP_004792.1	2	2p16.3c-p16.3b	12.0226	33.7131	22.8679	15.3375	67.0701	70.6009	44.236	57.4184	18.6428	32.4683	3.08734	1.93442	2.51088	0.815238	0.180274	0		1.73018
2709	CATGCACAACTGACACCA	TCATTACGGAACTCATCACAT	TAGAAGACGCACCGGTCATTACGGAACTCATTACATGTTAATATTCATAGCATGTGATGAGTTCCGTAATGATTTTTTGGCAAGCAAAAGACGGCATACGAGATCCTGGTGTCAGTTGTGCATGTTCGCCGTCTTCGT	CLL-H-030183	CASP5	Homo sapiens caspase 5, apoptosis-related cysteine peptidase (CASP5), mRNA.	ICEREL-III; ICE(rel)III; MGC141966; ICH-3	838	NM_001136109.1	4757913	NP_004338.1	11	11q22.3b	17.562	12.1479	14.855	3.82834	25.7714	29.2358	45.3576	37.2967	11.3998	30.5652	1.96808	3.05336	2.51072	0.767407	0.118571	0		1.72999
421	TGTGGTTGACGTCAACGT	GCTCAGATGAATGATGTTATT	TAGAAGACGCACCGGGCTCAGATGAATGATGTTATTGTTAATATTCATAGCAATAACATCATTCATCTGAGCTTTTTTGGCAAGCAAAAGACGGCATACGAGATCCACGTTGACGTCAACCACATTCGCCGTCTTCGT	CLL-H-027895	ADCY10	Homo sapiens adenylate cyclase 10 (soluble) (ADCY10), mRNA.		55811	NM_001167749.1	209976993	NP_060887.2	1	1q24.2a	6.58025	34.4399	20.5101	19.6998	96.0492	48.9156	54.0641	51.4899	3.64054	7.0704	2.38495	2.63598	2.51047	0.1775	0.160276	0		1.72968
19054	ACTGGTGTCAACGTACAC	GCCTGGTTAATCAACAGTCTT	TAGAAGACGCACCGGGCCTGGTTAATCAATAGTCTTGTTAATATTCATAGCAAGACTGTTGATTAACCAGGCTTTTTTGGCAAGCAAAAGACGGCATACGAGATCCGTGTACGTTGACACCAGTTTCGCCGTCTTCGT	CLL-H-046528	RAP2C	Homo sapiens RAP2C, member of RAS oncogene family (RAP2C), mRNA.	DKFZp313B211	57826	NM_021183.3	32129208	NP_067006.3	X	Xq26.2a	61.8949	46.5256	54.2102	10.8678	20.0475	49.4713	222.682	136.077	122.478	90.0069	0.912583	4.10775	2.51016	2.25932	0.4458	0		1.72931
15830	ACCATGTGACCAGTACGT	GCCTGGATGTTCCTAAACTGA	TAGAAGACGCACCGGGCCTGGATGTTTCTAAATTGAGTTAATATTCATAGCTCAGTTTAGGAACATCCAGGCTTTTTTGGCAAGCAAAAGACGGCATACGAGATCCACGTACTGGTCACATGGTTTCGCCGTCTTCGT	CLL-H-043304	OSM	Homo sapiens oncostatin M (OSM), mRNA.	MGC20461	5008	NM_020530.3	28178862	NP_065391.1	22	22q12.2b	76.5902	54.9045	65.7474	15.3341	23.3228	279.528	50.2431	164.886	162.129	98.3281	4.25155	0.764185	2.50787	2.46594	0.480012	0		1.72653
24829	GTCATGCACATGTGACTG	CCCAATTCTTACTCAGTGCTT	TAGAAGACGCACCGGCCCAATTCTTACTCAGTGTTTGTTAATATTCATAGCAAGCACTGAGTAAGAATTGGGTTTTTTGGCAAGCAAAAGACGGCATACGAGATCCCAGTCACATGTGCATGACTTCGCCGTCTTCGT	CLL-H-052303	TRIM48	Homo sapiens tripartite motif-containing 48 (TRIM48), mRNA.	MGC4827; RNF101	79097	NM_024114.3	34147361	NP_077019.1	11	11q11b	99.9827	54.593	77.2879	32.0953	41.527	49.7854	337.787	193.786	203.648	105.089	0.644156	4.3705	2.50733	2.63492	0.508032	0		1.72587
291	CAACCATGTGTGGTACGT	CCTACGATGCAGATGAGCAAT	TAGAAGACGCACCGGCCTACGATGTAGATGAGTAATGTTAATATTCATAGCATTGCTCATCTGCATCGTAGGTTTTTTGGCAAGCAAAAGACGGCATACGAGATCCACGTACCACACATGGTTGTTCGCCGTCTTCGT	CLL-H-027765	ADAMTS10	Homo sapiens ADAM metallopeptidase with thrombospondin type 1 motif, 10 (ADAMTS10), mRNA.	WMS; ADAM-TS10	81794	NM_030957.2	56121814	NP_112219.2	19	19p13.2d	28.2792	20.5684	24.4238	5.45233	22.3238	87.4416	35.0257	61.2337	37.0637	60.5282	3.58018	1.43408	2.50713	1.51752	0.299134	0		1.72563
14835	TGCAACGTCAGTGTTGGT	CTGCTCTACAACCTTAATGGA	TAGAAGACGCACCGGCTGCTCTACAACTTTAATGGAGTTAATATTCATAGCTCCATTAAGGTTGTAGAGCAGTTTTTTGGCAAGCAAAAGACGGCATACGAGATCCACCAACACTGACGTTGCATTCGCCGTCTTCGT	CLL-H-042309	OR2W3	Homo sapiens olfactory receptor, family 2, subfamily W, member 3 (OR2W3), mRNA.	OR2W8P; OR2W3P; OST718	343171	NM_001001957.2	68533231	NP_001001957.2	1	1q44e	32.9277	35.229	34.0784	1.62727	4.7751	49.0485	121.815	85.4319	51.4539	60.228	1.43929	3.57457	2.50693	1.50987	0.293761	0		1.72538
13390	TGGTCACAGTCAACACAC	CCAGTATATCATTCTTGTCAT	TAGAAGACGCACCGGCCAGTATATCATTCTTGTCATGTTAATATTCATAGCATGACAAGAATGATATACTGGTTTTTTGGCAAGCAAAAGACGGCATACGAGATCCGTGTGTTGACTGTGACCATTCGCCGTCTTCGT	CLL-H-040864	NFX1	Homo sapiens nuclear transcription factor, X-box binding 1 (NFX1), transcript variant 3, mRNA.	MGC20369; NFX2; DKFZp779G2416	4799	NM_002504.3	22212926	NP_667345.1	9	9p13.3e	26.665	22.3439	24.5044	3.05548	12.4691	79.5649	43.1429	61.3539	25.7542	41.9765	3.24696	1.76062	2.50379	1.051	0.182232	0		1.72157
3168	CACATGCAGTCAACTGCA	GAGCACGATCCTGAAGAACAA	TAGAAGACGCACCGGGAGCACGATCTTGAAGAATAAGTTAATATTCATAGCTTGTTCTTCAGGATCGTGCTCTTTTTTGGCAAGCAAAAGACGGCATACGAGATCCTGCAGTTGACTGCATGTGTTCGCCGTCTTCGT	CLL-H-030642	CENPB	Homo sapiens centromere protein B, 80kDa (CENPB), mRNA.		1059	NM_001810.5	51944960	NP_001801.1	20	20p13b	21.1697	22.7177	21.9437	1.09459	4.98817	76.1581	33.695	54.9265	30.0259	54.6656	3.47061	1.53552	2.50307	1.36832	0.260746	0		1.7207
3573	GTTGGTCAGTACCATGCA	CCCTTGGATGATGGAGCCAAA	TAGAAGACGCACCGGCCCTTGGATGGTGGAGCTAAAGTTAATATTCATAGCTTTGGCTCCATCATCCAAGGGTTTTTTGGCAAGCAAAAGACGGCATACGAGATCCTGCATGGTACTGACCAACTTCGCCGTCTTCGT	CLL-H-031047	CLDN6	Homo sapiens claudin 6 (CLDN6), mRNA.		9074	NM_021195.4	153792767	NP_067018.2	16	16p13.3d	12.2079	11.4315	11.8197	0.548955	4.64441	31.0117	28.1346	29.5732	2.0344	6.8792	2.62373	2.38032	2.50203	0.172119	0.0069701	0		1.71944
20400	CACATGACACTGTGACAC	GCCATGCAGAATTTCCTCAAT	TAGAAGACGCACCGGGCCATGCAGAATTTCCTTAATGTTAATATTCATAGCATTGAGGAAATTCTGCATGGCTTTTTTGGCAAGCAAAAGACGGCATACGAGATCCGTGTCACAGTGTCATGTGTTCGCCGTCTTCGT	CLL-H-047874	SATB2	Homo sapiens SATB homeobox 2 (SATB2), mRNA.	MGC119474; MGC119477; KIAA1034; FLJ21474; FLJ32076	23314	NM_001172509.1	38016201	NP_056080.1	2	2q33.1c-q33.1d	32.5572	17.3394	24.9483	10.7607	43.1318	2.82693	121.891	62.3592	84.1913	135.01	0.113312	4.88576	2.49954	3.37463	0.596671	0		1.71641
7504	CATGTGACTGCAGTACAC	GAACGTGTGCTACGATCACTA	TAGAAGACGCACCGGGAACGTGTGCTATGATCATTAGTTAATATTCATAGCTAGTGATCGTAGCACACGTTCTTTTTTGGCAAGCAAAAGACGGCATACGAGATCCGTGTACTGCAGTCACATGTTCGCCGTCTTCGT	CLL-H-034978	GJB2	Homo sapiens gap junction protein, beta 2, 26kDa (GJB2), mRNA.	DFNB1; NSRD1; HID; DFNA3; PPK; KID; CX26	2706	NM_004004.5	118572604	NP_003995.2	13	13q12.11a	16.3977	9.90524	13.1515	4.59086	34.9076	46.9102	18.8198	32.865	19.8629	60.4379	3.56692	1.431	2.49896	1.51032	0.304859	0		1.71571
1774	TGTGTGACCACAACTGTG	CGGAGAAGAGTTAAGGAGGAT	TAGAAGACGCACCGGCGGAGAAGAGTTAGGGAGGGTGTTAATATTCATAGCATCCTCCTTAACTCTTCTCCGTTTTTTGGCAAGCAAAAGACGGCATACGAGATCCCACAGTTGTGGTCACACATTCGCCGTCTTCGT	CLL-H-029248	BRD7	Homo sapiens bromodomain containing 7 (BRD7), mRNA.	CELTIX1; NAG4; BP75	29117	NM_001173984.1	41350211	NP_037395.2	16	16q12.1c	5.98044	18.6476	12.314	8.95703	72.7385	38.2965	23.2301	30.7633	10.6536	34.6308	3.10999	1.88647	2.49823	0.865157	0.201699	0		1.71483
1761	ACGTACTGCATGACACAC	CCCTTTGCTGTGACACTTCTT	TAGAAGACGCACCGGCCCTTTGTTGTGACATTTCTTGTTAATATTCATAGCAAGAAGTGTCACAGCAAAGGGTTTTTTGGCAAGCAAAAGACGGCATACGAGATCCGTGTGTCATGCAGTACGTTTCGCCGTCTTCGT	CLL-H-029235	BRD2	Homo sapiens bromodomain containing 2 (BRD2), mRNA.	FLJ31942; RNF3; D6S113E; RING3; DKFZp686N0336; NAT; FSRG1; KIAA9001	6046	NM_001113182.1	12408641	NP_005095.1	6	6p21.32a	44.4034	22.3024	33.3529	15.6278	46.856	27.6895	138.934	83.3116	78.6616	94.4185	0.830196	4.16557	2.49788	2.35846	0.471262	0		1.71441
15012	CATGACCAGTCAGTACTG	GCTTGCCTGTATAGACATATA	TAGAAGACGCACCGGGCTTGCCTGTATAGATATATAGTTAATATTCATAGCTATATGTCTATACAGGCAAGCTTTTTTGGCAAGCAAAAGACGGCATACGAGATCCCAGTACTGACTGGTCATGTTCGCCGTCTTCGT	CLL-H-042486	OR4K17	Homo sapiens olfactory receptor, family 4, subfamily K, member 17 (OR4K17), mRNA.	OR14-29	390436	NM_001004715.1	52317250	NP_001004715.1	14	14q11.2a	7.10949	36.3711	21.7403	20.6911	95.1739	25.7444	82.7976	54.271	40.3427	74.3356	1.18418	3.80848	2.49633	1.85566	0.417037	0		1.71252
17321	CAGTACACGTCATGTGAC	CCTGGCTTAATCTGGCAAAGT	TAGAAGACGCACCGGCCTGGTTTAATCTGGTAAAGTGTTAATATTCATAGCACTTTGCCAGATTAAGCCAGGTTTTTTGGCAAGCAAAAGACGGCATACGAGATCCGTCACATGACGTGTACTGTTCGCCGTCTTCGT	CLL-H-044795	PLXNC1	Homo sapiens plexin C1 (PLXNC1), mRNA.	CD232; VESPR; PLXN-C1	10154	NM_005761.1	5032222	NP_005752.1	12	12q22c	11.2376	18.8137	15.0257	5.35714	35.6533	62.2046	12.7937	37.4991	34.9388	93.1724	4.13989	0.851454	2.49567	2.32528	0.463467	0		1.71173
13677	CACATGACCATGACTGGT	GCAGGAATGGATGTAGACAAA	TAGAAGACGCACCGGGCAGGAATGGATGTAGATAAAGTTAATATTCATAGCTTTGTCTACATCCATTCCTGCTTTTTTGGCAAGCAAAAGACGGCATACGAGATCCACCAGTCATGGTCATGTGTTCGCCGTCTTCGT	CLL-H-041151	NPAT	Homo sapiens nuclear protein, ataxia-telangiectasia locus (NPAT), mRNA.	E14	4863	NM_002519.2	4505430	NP_002510.1	11	11q22.3c	30.4403	17.194	23.8171	9.36652	39.3268	57.0702	61.7536	59.4119	3.31165	5.57405	2.39618	2.59282	2.4945	0.139045	0.0368127	0		1.71031
6056	TGGTGTCATGTGCAACGT	CCGCTTCTTACACCAGTAATT	TAGAAGACGCACCGGCCGCTTCTTACACTAGTAATTGTTAATATTCATAGCAATTACTGGTGTAAGAAGCGGTTTTTTGGCAAGCAAAAGACGGCATACGAGATCCACGTTGCACATGACACCATTCGCCGTCTTCGT	CLL-H-033530	ESPL1	Homo sapiens extra spindle pole bodies homolog 1 (S. cerevisiae) (ESPL1), mRNA.	SEPARIN; ESP1; KIAA0165; FLJ46492	9700	NM_012291.4	134276942	NP_036423.4	12	12q13.13e	42.6128	36.1635	39.3881	4.56039	11.5781	136.055	60.4229	98.2391	53.4801	54.4387	3.45422	1.53404	2.49413	1.35777	0.261144	0		1.70985
6374	CAGTGTGTACTGTGTGGT	GCTCTTTATGAAACGCAACAT	TAGAAGACGCACCGGGCTCTTTATGAAACGTAACATGTTAATATTCATAGCATGTTGCGTTTCATAAAGAGCTTTTTTGGCAAGCAAAAGACGGCATACGAGATCCACCACACAGTACACACTGTTCGCCGTCTTCGT	CLL-H-033848	FAM76B	Homo sapiens family with sequence similarity 76, member B (FAM76B), mRNA.	MGC33371	143684	NM_144664.4	46195786	NP_653265.2	11	11q21c	23.2161	2.34652	12.7813	14.757	115.458	57.8313	5.92158	31.8765	36.7057	115.15	4.52468	0.4633	2.49399	2.87183	0.565312	0		1.70968
17393	GTTGGTACACTGCAACAC	GCATCGAATTTGCAGAACAAA	TAGAAGACGCACCGGGCATCGAATTTGCAGAATAAAGTTAATATTCATAGCTTTGTTCTGCAAATTCGATGCTTTTTTGGCAAGCAAAAGACGGCATACGAGATCCGTGTTGCAGTGTACCAACTTCGCCGTCTTCGT	CLL-H-044867	PNN	Homo sapiens pinin, desmosome associated protein (PNN), mRNA.	SDK3; DRS; memA; pinin	5411	NM_002687.3	133908618	NP_002678.2	14	14q21.1b	35.6445	48.8202	42.2323	9.31662	22.0604	121.075	89.5651	105.32	22.2808	21.1554	2.86688	2.12077	2.49382	0.527577	0.0660889	0		1.70948
3739	GTACTGGTGTGTTGACCA	CACTGAATTATGGCCTCGAAA	TAGAAGACGCACCGGCACTGAATTATGGCCTTGAAAGTTAATATTCATAGCTTTCGAGGCCATAATTCAGTGTTTTTTGGCAAGCAAAAGACGGCATACGAGATCCTGGTCAACACACCAGTACTTCGCCGTCTTCGT	CLL-H-031213	CNKSR3	Homo sapiens CNKSR family member 3 (CNKSR3), mRNA.	MAGI1; RP11-486M3.1; FLJ31349	154043	NM_173515.2	74316005	NP_775786.2	6	6q25.2c	4.45446	13.0512	8.75285	6.07885	69.4499	20.006	23.6388	21.8224	2.56878	11.7713	2.28565	2.7007	2.49318	0.293479	0.107343	0		1.70869
13567	ACGTCAGTCAACACTGTG	GAGTGGCATAATTAAGCTCTT	TAGAAGACGCACCGGGAGTGGCATAATTAAGTTCTTGTTAATATTCATAGCAAGAGCTTAATTATGCCACTCTTTTTTGGCAAGCAAAAGACGGCATACGAGATCCCACAGTGTTGACTGACGTTTCGCCGTCTTCGT	CLL-H-041041	NLRP7	Homo sapiens NLR family, pyrin domain containing 7 (NLRP7), transcript variant 2, mRNA.	MGC126470; PYPAF3; NALP7; HYDM; CLR19.4; PAN7; MGC126471; NOD12	199713	NM_001127255.1	75709195	NP_996611.2	19	19q13.42b	33.2541	17.7651	25.5096	10.9524	42.9344	37.2938	89.8882	63.591	37.1899	58.483	1.46195	3.52371	2.49283	1.45788	0.299248	0		1.70828
4451	CATGGTCACAGTGTACTG	CCTGCCCTTATAGGAACAGAA	TAGAAGACGCACCGGCCTGCCTTTATAGGAATAGAAGTTAATATTCATAGCTTCTGTTCCTATAAGGGCAGGTTTTTTGGCAAGCAAAAGACGGCATACGAGATCCCAGTACACTGTGACCATGTTCGCCGTCTTCGT	CLL-H-031925	CXCL1	Homo sapiens chemokine (C-X-C motif) ligand 1 (melanoma growth stimulating activity, alpha) (CXCL1), mRNA.	GROa; FSP; GRO1; MGSA alpha; NAP-3; MGSA-a; MGSA; SCYB1	2919	NM_001511.1	4504152	NP_001502.1	4	4q13.3d	39.7461	38.4996	39.1229	0.881404	2.25291	97.9883	96.8839	97.4361	0.780928	0.801477	2.50463	2.4764	2.49052	0.0199609	0.000203841	0		1.70547
[truncated: 26,678 more rows]

## Sheet: z-Score>2,p<0.05
#	Barcode Sequence	mRNA Target Sequence	Gene Symbol	Definition	Redundancy	ave-fc	sd-fc	t-test	z-Score
10159	GTACTGCAGTTGCACACA	GGATCCCTTGGCTGGTATAAT	KIF11	Homo sapiens kinesin family member 11 (KIF11), mRNA.	5	30.775	0.321811	0.000503854	36.034
[truncated: 133 more rows]
